# Supplementary material for: Infection of C. elegans by Haptoglossa Species Reveals Shared Features in the Host Response to Oomycete Detection
Source: Front Cell Infect Microbiol. 2021 Oct 14;11:733094. doi: 10.3389/fcimb.2021.733094 (PMC8552708; doi:10.3389/fcimb.2021.733094)
Supplement: Supplementary Table 1 — RNA-seq results of C. elegans 6 hour and 12 hour post H. zoospora exposure. Sheet 1 gives the summary of total differentially expressed genes. Sheet 2 (6 h) and Sheet 3 (12 h) give the list of all differentially expressed genes along with their transcript names, Wormbase Gene IDs, gene/sequence names, Wald test p value and p-value adjusted for multiple test correction. [file DataSheet_1.xlsx]

## Sheet: Summary
Table: Differentially expressed genes as determined by Kallisto and Sleuth (pval<0.01, qval<0.1)
	MBAo1 inf 6h	MBAo1 inf 12h
UP genes	1257	514
DOWN genes	713	108
Total Dif. expressed	1970	622

## Sheet: MBAo1 inf 6h L4
Table: Differentially expressed genes as determined by Kallisto and Sleuth (pval<0.01, qval<0.1)
target_id	WormBase Gene ID	Public Name	pval	qval	b	se_b	mean_obs	var_obs	tech_var	sigma_sq	smooth_sigma_sq	final_sigma_sq
T21E8.1c	WBGene00004000	pgp-6	9.84989e-169	2.24154e-164	8.39067	0.303048	3.5022	21.1456	0.00935093	0.0214166	0.128406	0.128406
Y71H2AR.2	WBGene00022189	Y71H2AR.2	3.00011e-22	9.10312e-20	8.22201	0.847586	4.69936	21.1425	0.0946092	0.982994	0.0403368	0.982994
R09D1.5	WBGene00011161	chil-18	1.8179e-133	2.0685e-129	8.00468	0.325589	3.30919	19.2329	0.000317741	0.0126652	0.158695	0.158695
ZK938.5	WBGene00003863	old-2	6.9693e-71	2.26572e-67	7.68573	0.431764	3.14972	17.9448	0.000501841	0.279128	0.189288	0.279128
ZK938.6	WBGene00014162	chil-9	6.73137e-101	3.82964e-97	7.65364	0.358914	3.13368	17.6312	0.0005378	0.071576	0.192691	0.192691
C17H1.4a	WBGene00007657	pals-3	5.11998e-50	7.76769e-47	7.55021	0.50773	3.08196	17.2037	0.182583	-0.0550476	0.204101	0.204101
F56A6.5	WBGene00044427	F56A6.5	1.80429e-36	1.28313e-33	7.075	0.560956	3.34472	15.3943	0.0549973	0.41701	0.152608	0.41701
Y58A7A.4	WBGene00021978	Y58A7A.4	1.18114e-06	4.79799e-05	7.06846	1.45478	5.41407	17.5286	0.0709349	3.10365	0.0263707	3.10365
F11A5.3	WBGene00008671	F11A5.3	8.11566e-62	1.42068e-58	7.04959	0.424908	2.83165	14.9186	0.000878101	0.0111168	0.269943	0.269943
Y32B12B.8	WBGene00202504	Y32B12B.8	5.7592e-25	2.1139e-22	6.88021	0.666727	3.35675	14.7346	0.0520034	0.614783	0.150602	0.614783
Y119D3A.2	WBGene00022477	fbxa-28	1.1242e-44	1.21826e-41	6.86334	0.489427	3.07491	14.4191	0.0720842	0.287224	0.205709	0.287224
Y113G7B.1b	WBGene00013754	fbxa-116	1.0631e-25	4.24436e-23	6.78797	0.647684	3.30041	14.3264	0.163437	0.465804	0.160239	0.465804
ZK938.8	WBGene00044804	ZK938.8	1.59422e-24	5.58149e-22	6.77605	0.662944	3.58305	14.3019	0.158352	0.500889	0.117583	0.500889
B0507.8	WBGene00015225	B0507.8	4.41452e-29	2.23247e-26	6.77337	0.605146	5.17134	14.203	0.0974273	0.451875	0.0307365	0.451875
C38D9.2.1	WBGene00008010	C38D9.2	1.07251e-45	1.28458e-42	6.74237	0.475185	2.67804	13.8639	0.0181714	0.264315	0.320529	0.320529
C53A5.11	WBGene00008269	C53A5.11	4.97837e-23	1.57351e-20	6.70291	0.678289	2.9947	14.0308	0.0900507	0.600063	0.22496	0.600063
B0284.4	WBGene00007134	pals-28	8.64709e-20	2.13893e-17	6.66283	0.731797	3.13864	13.9606	0.063202	0.740089	0.191632	0.740089
Y50D4B.5	WBGene00021744	clec-203	2.61946e-43	2.7096e-40	6.61841	0.479664	2.61606	13.1428	0.00162225	0.000655887	0.343493	0.343493
T05A8.2.1	WBGene00020228	T05A8.2	2.65999e-38	2.16191e-35	6.54931	0.506111	2.58151	13.1051	0.0272384	0.269049	0.356984	0.356984
F14F9.3	WBGene00017466	F14F9.3	9.40042e-41	8.91355e-38	6.46468	0.483622	4.93068	12.8183	0.0783605	0.272475	0.0351403	0.272475
F42C5.3a	WBGene00018345	F42C5.3	2.58049e-09	1.76349e-07	6.43832	1.08093	3.56684	13.8377	0.135216	1.6174	0.119673	1.6174
F40H7.12	WBGene00044379	F40H7.12	2.15738e-12	2.17236e-10	6.43548	0.916224	5.79114	13.432	0.0614964	1.1977	0.0208313	1.1977
W04G5.8	WBGene00012268	W04G5.8	8.29682e-15	1.13741e-12	6.42291	0.827379	3.99727	13.1976	0.109497	0.917337	0.0756916	0.917337
Y119D3A.4	WBGene00022479	fbxa-36	2.94912e-30	1.67783e-27	6.34887	0.55544	3.3264	12.4627	0.150462	0.312309	0.155716	0.312309
K09C8.3b	WBGene00003529	nas-10	4.25747e-15	6.09354e-13	6.33178	0.806893	3.23069	12.8087	0.064909	0.911706	0.173049	0.911706
R09D1.4	WBGene00011160	R09D1.4	8.23566e-27	3.67488e-24	6.0945	0.568538	3.06376	11.5308	0.181083	0.30377	0.20828	0.30377
K08F9.3c	WBGene00010686	K08F9.3	1.5539e-16	2.61941e-14	6.02488	0.730086	2.99562	11.5294	0.107261	0.692276	0.22473	0.692276
F15A4.8b	WBGene00008842	chil-28	1.26079e-23	4.09884e-21	5.90784	0.589678	2.26077	10.5146	0.0123594	0.0424498	0.509221	0.509221
T24A6.7	WBGene00020747	T24A6.7	9.59886e-27	4.20079e-24	5.85344	0.546773	2.56996	10.4493	0.0868348	0.126212	0.361606	0.361606
C35B1.2b	WBGene00016432	C35B1.2	3.80821e-08	2.11891e-06	5.83641	1.06126	2.22509	10.2406	1.15984	-1.13298	0.529561	0.529561
W09G12.8	WBGene00021122	W09G12.8	4.53245e-18	9.82332e-16	5.83597	0.673545	2.73714	10.762	0.0937662	0.586727	0.300041	0.586727
T14G10.5b	WBGene00011775	T14G10.5	9.11961e-07	3.78713e-05	5.82747	1.18692	2.3617	11.8783	1.06135	1.05182	0.455633	1.05182
ZC196.6a	WBGene00022550	droe-8	2.58982e-14	3.27425e-12	5.77247	0.757808	3.2391	10.6856	0.29422	0.56719	0.171448	0.56719
B0507.10	WBGene00015227	ddn-1	3.93702e-68	8.14497e-65	5.7686	0.330724	6.03804	10.1143	0.0219461	0.142122	0.0180469	0.142122
F15H10.6	WBGene00008873	F15H10.6	5.05514e-27	2.3113e-24	5.74927	0.534087	2.89799	10.1271	0.177237	0.0864034	0.250637	0.250637
T26F2.3.2	WBGene00045401	eol-1	5.31626e-18	1.13067e-15	5.71943	0.661483	4.16132	10.3386	0.146375	0.509965	0.0640387	0.509965
Y46E12A.1	WBGene00000560	cnc-6	0.00047608	0.00949324	5.70343	1.63241	4.29751	12.9565	0.0896908	3.90747	0.0559846	3.90747
F58A3.5.2	WBGene00010225	ttr-31	3.8691e-05	0.00107377	5.66975	1.37777	2.37738	9.9385	2.39958	-2.03125	0.447803	0.447803
T20H9.2	WBGene00020638	fbxa-43	2.8354e-30	1.65449e-27	5.61133	0.490769	3.43881	9.68263	0.223654	0.0719803	0.137626	0.137626
Y17D7B.3	WBGene00012451	Y17D7B.3	5.11263e-15	7.27176e-13	5.56951	0.711839	3.29236	9.91389	0.109069	0.651004	0.161666	0.651004
C49A9.8.2	WBGene00016762	ugt-24	1.73291e-07	8.4085e-06	5.5484	1.06171	2.08447	9.281	1.07343	-1.01648	0.617403	0.617403
K10H10.9	WBGene00010764	K10H10.9	1.48201e-17	2.90743e-15	5.53147	0.648583	2.07259	9.50165	0.00556625	0.397557	0.625424	0.625424
ZK1251.11a	WBGene00002091	ins-8	3.07092e-17	5.82374e-15	5.51881	0.653591	2.06626	9.27871	0.011035	0.165874	0.629736	0.629736
K03D3.10	WBGene00004287	rac-2	1.06701e-22	3.3263e-20	5.48308	0.559189	2.72802	9.19734	0.165922	0.056669	0.303116	0.303116
F14H8.6b	WBGene00000562	cng-1	1.29115e-10	1.0346e-08	5.45121	0.848013	2.86884	9.77765	0.36647	0.712219	0.258942	0.712219
C17H1.10.1	WBGene00044237	pals-9	6.3966e-12	6.04014e-10	5.40172	0.786217	2.00772	9.03693	0.256237	0.0979526	0.670969	0.670969
R06B9.1	WBGene00011052	arrd-11	5.82604e-22	1.72186e-19	5.39325	0.559898	3.22236	9.10233	0.237446	0.232783	0.174648	0.232783
F22B7.4	WBGene00017695	fip-1	1.34419e-22	4.13374e-20	5.35347	0.547274	2.48396	8.90752	0.0513478	0.335677	0.397915	0.397915
R11G11.3	WBGene00020013	R11G11.3	5.40457e-15	7.63924e-13	5.3381	0.682873	1.9759	8.66809	0.00504736	0.144332	0.694426	0.694426
ZC47.13a	WBGene00013844	fbxa-50	1.7461e-14	2.23235e-12	5.3113	0.692651	1.9625	8.58476	0.015113	0.13713	0.704536	0.704536
C54D10.14a	WBGene00138721	pals-37	0.00116296	0.0199739	5.29326	1.62979	3.52551	11.5931	0.0817485	3.90259	0.125181	3.90259
F48C1.11	WBGene00195179	F48C1.11	2.26728e-06	8.62817e-05	5.26063	1.11265	3.21193	9.78785	0.0855191	1.77147	0.176675	1.77147
C32B5.13	WBGene00016306	C32B5.13	1.42083e-20	3.75975e-18	5.20018	0.559233	2.95983	8.3036	0.235218	0.00359883	0.233894	0.233894
C18D11.6	WBGene00007682	C18D11.6	0.000448904	0.00903247	5.19898	1.48139	3.38597	10.7422	0.00483469	3.28694	0.145842	3.28694
K02H11.6	WBGene00019349	trx-5	1.00934e-14	1.35914e-12	5.18486	0.670045	2.27255	8.60358	0.11164	0.5618	0.502672	0.5618
W04G5.7	WBGene00012267	W04G5.7	3.92454e-13	4.42132e-11	5.17735	0.713316	1.89553	8.29999	0.00605829	0.317085	0.757171	0.757171
Y48E1B.9b.1	WBGene00013008	clec-146	2.0719e-08	1.21209e-06	5.1391	0.916733	1.8764	8.06638	0.487737	-0.308659	0.772862	0.772862
ZK1098.10p.1	WBGene00006755	unc-16	0.000181567	0.00414851	5.07792	1.35651	1.84678	8.78368	1.96241	-0.6523	0.797776	0.797776
R06C7.3.1	WBGene00000963	dhp-1	0.000176211	0.00406285	5.03845	1.34327	1.82608	8.11766	1.89092	-1.26358	0.815633	0.815633
Y113G7B.1a	WBGene00013754	fbxa-116	1.73988e-14	2.23235e-12	5.00842	0.653114	2.32513	7.85999	0.165437	0.252956	0.474399	0.474399
F20C5.1d	WBGene00004051	parg-1	1.21823e-05	0.000386119	5.00827	1.14493	1.81099	8.60067	1.13742	0.207355	0.828881	0.828881
W04G5.16	WBGene00206393	W04G5.16	2.15266e-11	1.9136e-09	5.00689	0.747824	1.8103	7.58989	0.0093676	0.0771456	0.829494	0.829494
Y54G2A.8a	WBGene00021873	clec-82	2.49531e-07	1.15418e-05	5.00423	0.970178	1.80897	7.54236	0.581195	-0.54411	0.830672	0.830672
C17H1.5	WBGene00007658	pals-4	5.78707e-50	8.23103e-47	4.97912	0.335016	4.75117	7.57218	0.0467058	0.121648	0.0390282	0.121648
Y119D3A.3	WBGene00022478	fbxa-35	1.10259e-19	2.66932e-17	4.97364	0.547859	3.18221	7.53759	0.267638	-0.122057	0.182586	0.182586
Y51H4A.9	WBGene00000710	col-137	1.63349e-13	1.91615e-11	4.96352	0.672945	2.16188	7.61987	0.111803	0.174348	0.56748	0.56748
B0496.3b	WBGene00006814	unc-82	0.00231563	0.0349447	4.95608	1.62684	1.78674	7.43079	3.11931	-3.04184	0.850594	0.850594
F28D1.3	WBGene00009213	thn-1	6.05205e-111	4.59088e-107	4.92126	0.219887	4.86611	7.29203	0.0360802	-0.00308668	0.0364454	0.0364454
C17H1.13b	WBGene00044708	pals-11	2.15419e-10	1.69629e-08	4.92121	0.775002	1.76746	7.3856	0.0326965	0.117451	0.868246	0.868246
F26F12.3b.1	WBGene00017834	F26F12.3	0.00258088	0.0381383	4.88747	1.62175	3.36044	10.3223	0.952365	2.99276	0.149992	2.99276
T05A8.1.2	WBGene00020227	T05A8.1	5.19603e-17	9.45969e-15	4.86569	0.58048	2.5833	7.46442	0.149164	0.303274	0.356272	0.356272
K08F9.3b	WBGene00010686	K08F9.3	7.08221e-11	5.94722e-09	4.86019	0.745553	2.39475	7.75346	0.135768	0.698007	0.439282	0.698007
Y39A3B.7	WBGene00206512	Y39A3B.7	1.42765e-14	1.86718e-12	4.85172	0.630597	2.23308	7.38005	0.0715405	0.326331	0.524938	0.524938
ZC47.12	WBGene00013843	fbxa-49	3.49381e-08	1.96317e-06	4.82347	0.874658	3.15112	7.89779	0.0666152	1.08092	0.188993	1.08092
C45G7.3	WBGene00016670	ilys-3	1.98004e-06	7.65023e-05	4.78654	1.00654	2.07339	8.08905	0.101964	1.41772	0.624878	1.41772
H23L24.5	WBGene00004052	parg-2	6.3536e-25	2.29506e-22	4.78562	0.464175	4.99969	7.1292	0.0509235	0.272264	0.0338247	0.272264
K08F9.3a	WBGene00010686	K08F9.3	9.52612e-19	2.18976e-16	4.68957	0.530462	3.73332	6.79782	0.322106	-0.0718602	0.0999794	0.0999794
T24F1.3b.1	WBGene00011995	rsf-1	0.00142772	0.0236468	4.67758	1.46679	1.6597	7.53223	2.25388	-1.04351	0.973345	0.973345
B0213.17	WBGene00015046	nlp-34	4.4609e-07	1.95978e-05	4.6619	0.923486	6.38491	7.54339	0.0157739	1.26346	0.014882	1.26346
F49E11.10a.2	WBGene00009895	scl-2	0.00249622	0.0371527	4.61613	1.5266	3.12069	9.18919	0.37188	3.12387	0.195492	3.12387
B0281.7	WBGene00023225	B0281.7	3.67213e-08	2.05323e-06	4.5935	0.834281	1.6036	6.34514	0.0113748	0.00746444	1.03266	1.03266
F26D11.13	WBGene00045393	F26D11.13	7.1419e-08	3.80628e-06	4.58804	0.851598	2.75893	7.18529	0.135801	0.952026	0.292818	0.952026
B0281.8	WBGene00015114	B0281.8	4.6794e-12	4.51225e-10	4.57874	0.662148	2.14116	6.75326	0.0772026	0.502569	0.580457	0.580457
T17A3.10	WBGene00020546	zig-13	8.37244e-24	2.76133e-21	4.57053	0.454366	4.22363	6.51466	0.0770036	0.232669	0.0601865	0.232669
K09F6.10.3	WBGene00019593	K09F6.10	3.1737e-06	0.000115929	4.56963	0.980765	2.5096	7.35273	1.05612	0.304235	0.386734	0.386734
F57H12.3	WBGene00003879	ora-1	1.94057e-07	9.23884e-06	4.53188	0.870688	6.39405	7.0711	0.0108865	1.12626	0.0148064	1.12626
C38D9.2.2	WBGene00008010	C38D9.2	9.84934e-17	1.68527e-14	4.4709	0.538236	4.60411	6.34433	0.0643602	0.370186	0.0430538	0.370186
Y71H2AM.25	WBGene00044760	Y71H2AM.25	1.03691e-24	3.68702e-22	4.4453	0.433148	4.89	6.15334	0.0456078	0.235818	0.0359526	0.235818
T07H8.5	WBGene00005188	srg-31	8.51833e-18	1.74641e-15	4.43309	0.515933	3.16461	6.08488	0.213094	0.023387	0.186186	0.186186
F43G9.6b.2	WBGene00001414	fer-1	0.000664855	0.0126309	4.42439	1.29988	1.53063	5.89575	1.41967	-1.39068	1.11488	1.11488
K11D2.2.1	WBGene00010769	asah-1	0.00360182	0.0492884	4.41658	1.51716	1.51515	5.92781	2.31959	-2.22465	1.13309	1.13309
F13D11.4.2	WBGene00017429	F13D11.4	0.00101653	0.0178635	4.35884	1.32652	2.21748	6.4825	2.1055	-1.12718	0.533997	0.533997
F11A5.13	WBGene00008679	F11A5.13	4.21234e-13	4.67611e-11	4.35862	0.601309	2.55147	6.13316	0.112263	0.430095	0.369134	0.430095
C04A11.5	WBGene00007288	C04A11.5	1.35572e-11	1.21945e-09	4.34864	0.643047	2.4821	6.16942	0.12965	0.490614	0.398736	0.490614
K02H8.1b.1	WBGene00019347	mbl-1	0.00405528	0.0541936	4.34748	1.51278	1.48069	5.77343	2.25813	-2.12906	1.17463	1.17463
ZK970.7	WBGene00014173	ZK970.7	4.28251e-08	2.3482e-06	4.32427	0.789274	7.58612	6.35733	0.00301565	0.931415	0.00933818	0.931415
F22E12.4b.1	WBGene00001178	egl-9	0.00052153	0.0102616	4.32341	1.24614	1.46856	5.62003	1.13971	-1.12414	1.18958	1.18958
F37A4.7b	WBGene00004316	rbf-1	8.34832e-05	0.00214912	4.30459	1.09415	1.45915	5.58176	0.594453	-0.565825	1.20131	1.20131
T20D4.7	WBGene00020613	T20D4.7	7.60916e-46	9.6201e-43	4.26905	0.300362	5.67493	5.57569	0.0118215	0.123505	0.0223493	0.123505
F14F9.4	WBGene00017467	F14F9.4	6.12919e-22	1.76559e-19	4.25471	0.44194	6.81912	5.66515	0.00532074	0.287646	0.0118449	0.287646
K08F9.3d	WBGene00010686	K08F9.3	9.5468e-06	0.000311702	4.24626	0.959131	1.42998	5.50203	0.141565	-0.0255459	1.23833	1.23833
Y58A7A.5	WBGene00021979	Y58A7A.5	2.16194e-11	1.91437e-09	4.2358	0.632715	6.02701	5.863	0.00850198	0.59199	0.0181602	0.59199
Y105E8B.1p	WBGene00002978	lev-11	0.00279622	0.0405827	4.21314	1.40941	1.48637	5.37688	1.81196	-1.7473	1.16769	1.16769
Y105C5A.1270	WBGene00194646	Y105C5A.1270	2.80284e-09	1.89271e-07	4.21067	0.70854	2.12869	5.69372	0.164645	0.303834	0.588398	0.588398
T12G3.1a.2	WBGene00011737	sqst-1	0.00662106	0.0783136	4.1956	1.54516	4.02904	8.14593	1.71609	1.86517	0.0732506	1.86517
F32G8.3	WBGene00009339	F32G8.3	2.2399e-10	1.7577e-08	4.1951	0.661279	2.43967	5.80442	0.123045	0.53289	0.41796	0.53289
K02E7.10	WBGene00019314	K02E7.10	5.0496e-89	1.91523e-85	4.19405	0.209657	4.91458	5.29058	0.030476	-0.0135083	0.0354581	0.0354581
T09F5.20b	WBGene00202514	T09F5.20	2.20334e-08	1.27912e-06	4.17305	0.745823	2.12063	5.8918	0.0688168	0.765561	0.593592	0.765561
C17H1.6	WBGene00007659	pals-5	1.53427e-07	7.55742e-06	4.10638	0.782407	1.97885	5.79331	0.0860537	0.832187	0.692222	0.832187
F22F7.7a.1	WBGene00017724	F22F7.7	0.00107924	0.0187913	4.09415	1.25241	1.35393	5.24392	1.01284	-0.743707	1.33996	1.33996
F15H10.12	WBGene00195181	F15H10.12	2.116e-05	0.000625375	4.07225	0.957661	1.34298	5.00873	0.0204584	0.0217653	1.35521	1.35521
K04C1.2a.1	WBGene00010552	K04C1.2	0.00819199	0.0914745	4.0581	1.5348	2.57651	5.80584	3.17444	-2.09269	0.358978	0.358978
T16A1.7	WBGene00004149	trpl-5	6.90881e-06	0.000234313	4.05786	0.902454	2.74765	5.91719	0.102733	1.1189	0.296535	1.1189
F26F2.4b	WBGene00009169	F26F2.4	1.41658e-06	5.63585e-05	4.05227	0.840257	1.67622	5.15623	0.102557	0.184883	0.956492	0.956492
F53H2.1a	WBGene00010004	F53H2.1	3.33191e-05	0.000944263	4.0455	0.974934	1.3296	4.9811	0.0516789	0.0374287	1.37407	1.37407
T21E8.2	WBGene00004001	pgp-7	4.83544e-07	2.09374e-05	4.03244	0.801244	1.83582	5.3053	0.155807	0.378091	0.80718	0.80718
Y46C8AL.3	WBGene00021581	clec-70	1.23956e-06	4.99269e-05	4.02875	0.830805	1.69449	5.59318	0.0971804	0.807753	0.938175	0.938175
C02F12.1a	WBGene00006643	tsp-17	0.000814152	0.0148936	4.01452	1.1991	1.31411	4.86335	0.760573	-0.725029	1.3962	1.3962
R09B5.2	WBGene00000555	cnc-1	1.77443e-05	0.000542753	3.97599	0.926473	2.57635	5.77257	0.0885823	1.19895	0.359042	1.19895
F14H8.6a	WBGene00000562	cng-1	0.00231974	0.0349636	3.95729	1.29921	3.82793	6.72359	0.925144	1.60679	0.090388	1.60679
C06B3.7	WBGene00007366	C06B3.7	4.10954e-16	6.72811e-14	3.93095	0.483198	6.10108	4.91589	0.00909104	0.341129	0.0174175	0.341129
C54D10.12	WBGene00044787	pals-36	2.22873e-06	8.52425e-05	3.91895	0.828269	2.37894	5.43068	0.168653	0.860391	0.447035	0.860391
C08H9.8	WBGene00007468	C08H9.8	3.59556e-07	1.61071e-05	3.91714	0.769696	1.94505	4.75526	0.170738	0.0193286	0.717909	0.717909
F53B6.8	WBGene00009963	fipr-26	1.18831e-05	0.000379275	3.905	0.891609	2.60401	5.52867	0.0969634	1.09549	0.348141	1.09549
Y53F4B.27b	WBGene00013173	Y53F4B.27	0.00208896	0.0321422	3.87485	1.25918	1.24428	4.53896	0.878106	-0.834844	1.50019	1.50019
C17H1.4b	WBGene00007657	pals-3	2.85212e-09	1.92029e-07	3.87018	0.651557	3.01292	4.58927	0.41636	-0.296627	0.22043	0.22043
Y49C4A.8b	WBGene00021709	ugt-29	6.3066e-05	0.00166496	3.84759	0.961647	3.04972	5.55089	0.52477	0.862379	0.211565	0.862379
F07G11.9	WBGene00017233	lmd-4	3.04729e-09	2.03962e-07	3.84063	0.647767	5.4006	4.92865	0.0203626	0.60904	0.026605	0.60904
T19H5.3	WBGene00011848	chil-27	8.36094e-15	1.13934e-12	3.83197	0.493685	3.19902	4.69768	0.16834	0.197247	0.179218	0.197247
B0284.1	WBGene00007131	pals-26	5.4911e-08	2.96116e-06	3.82627	0.704053	5.23326	4.98693	0.0249585	0.718578	0.0296359	0.718578
T05F1.9	WBGene00011494	T05F1.9	2.1209e-29	1.12245e-26	3.82104	0.339414	4.50818	4.51835	0.0407962	0.132007	0.0463058	0.132007
Y38E10A.15	WBGene00012593	nspe-7	1.78619e-08	1.06887e-06	3.82061	0.678431	2.79381	4.93143	0.166251	0.524152	0.281614	0.524152
R13D11.10	WBGene00020063	R13D11.10	0.000198023	0.00449293	3.8159	1.02536	1.2148	4.6501	0.0308301	0.321386	1.54621	1.54621
ZC47.13b	WBGene00013844	fbxa-50	2.90867e-16	4.79657e-14	3.81448	0.466486	3.4921	4.62622	0.140265	0.18615	0.129831	0.18615
F10D7.5c	WBGene00017342	F10D7.5	0.00237027	0.0354918	3.8027	1.25112	1.2082	4.43451	0.79126	-0.670807	1.5567	1.5567
F56D2.5	WBGene00018966	F56D2.5	1.11762e-17	2.23101e-15	3.78155	0.441711	6.39846	4.52417	0.00475028	0.287913	0.01477	0.287913
B0507.6	WBGene00015223	B0507.6	9.54746e-17	1.646e-14	3.77845	0.454672	4.39184	4.53107	0.0430013	0.267088	0.0511698	0.267088
C15B12.5b	WBGene00001517	gar-1	0.00523954	0.0649789	3.75763	1.34589	1.18567	4.29351	1.12416	-1.05219	1.59299	1.59299
ZK673.1b	WBGene00014057	ZK673.1	0.000916612	0.0164376	3.73995	1.12821	1.17683	4.26568	0.301837	-0.214937	1.60744	1.60744
F08F3.7	WBGene00000373	cyp-14A5	5.98846e-36	4.00822e-33	3.72907	0.297908	7.11097	4.27828	0.00223512	0.130889	0.0105742	0.130889
C32B5.7b	WBGene00016300	C32B5.7	0.00220667	0.0335452	3.71967	1.21522	1.16669	4.40989	0.590974	-0.267106	1.62416	1.62416
Y75B8A.39	WBGene00023483	Y75B8A.39	8.59311e-08	4.4749e-06	3.71732	0.69428	4.25427	4.72398	0.0572146	0.665823	0.0583974	0.665823
T28A11.13	WBGene00020875	T28A11.13	3.27019e-06	0.000119072	3.71606	0.798625	1.87454	4.34073	0.182297	0.0651891	0.774406	0.774406
K07E3.4a	WBGene00019492	K07E3.4	0.00582275	0.0709359	3.71246	1.34626	2.57457	6.30961	2.24128	0.477359	0.359756	0.477359
K03D3.13	WBGene00044670	rac-3	4.70628e-07	2.04782e-05	3.7118	0.736773	2.00636	4.43941	0.142296	0.240426	0.671955	0.671955
ZC443.5	WBGene00013900	ugt-18	0.00303861	0.0434631	3.6687	1.23783	3.48934	5.87649	0.0225742	2.27578	0.130223	2.27578
C05E4.12	WBGene00015491	C05E4.12	4.02283e-05	0.00111372	3.65038	0.889	2.38256	4.94596	0.0972795	1.0882	0.445248	1.0882
F57H12.6.2	WBGene00019021	F57H12.6	1.38971e-05	0.000431455	3.62614	0.834463	5.32005	4.78026	0.0288457	1.01565	0.0280648	1.01565
F47B8.4b	WBGene00009805	F47B8.4	0.00216245	0.0330718	3.62537	1.18207	1.11954	3.95669	0.391865	-0.374749	1.70408	1.70408
Y49C4A.8a.2	WBGene00021709	ugt-29	6.13483e-05	0.00162716	3.61966	0.903207	6.46336	4.42186	1.20943	-0.595329	0.0142465	0.0142465
C14F11.6.1	WBGene00015781	C14F11.6	0.00320868	0.0455236	3.61524	1.22675	2.32493	5.72688	1.2711	0.986277	0.474501	0.986277
B0507.7	WBGene00015224	B0507.7	1.76132e-09	1.22576e-07	3.61217	0.600185	2.75414	4.18771	0.245942	0.0957984	0.294391	0.294391
Y9C9A.3	WBGene00006208	str-163	0.000101025	0.00250711	3.60814	0.927992	2.01242	4.93901	0.0301489	1.26161	0.667564	1.26161
Y82E9BR.32	WBGene00255597	pals-21	0.000840864	0.0152718	3.60689	1.08024	1.1103	4.12615	0.0302056	0.248852	1.72016	1.72016
C54D10.7	WBGene00008301	pals-39	0.00140987	0.0234022	3.56827	1.11766	4.61192	5.31877	0.0623361	1.81141	0.0428136	1.81141
C31B8.4	WBGene00016281	pals-32	1.04256e-07	5.36775e-06	3.56607	0.670422	3.05021	4.35443	0.12869	0.54551	0.211449	0.54551
Y17G9A.4	WBGene00021197	Y17G9A.4	2.50051e-68	5.69042e-65	3.53539	0.20239	6.03505	3.79885	0.00756069	0.0538816	0.0180775	0.0538816
F53B6.9	WBGene00009964	fip-6	7.41592e-13	8.03639e-11	3.52773	0.491907	5.95394	4.02384	0.00807883	0.35488	0.0189349	0.35488
C17C3.4	WBGene00002094	ins-11	0.000754093	0.0139746	3.52268	1.04558	2.98664	5.03466	0.0496428	1.59021	0.226992	1.59021
T12A7.6.2	WBGene00011727	T12A7.6	0.00478335	0.060983	3.50115	1.24098	1.56919	4.13885	1.23936	-0.662577	1.0707	1.0707
R09D1.12	WBGene00011168	R09D1.12	4.68267e-08	2.54937e-06	3.49303	0.639402	3.32232	4.15097	0.130821	0.482432	0.156417	0.482432
Y2H9A.6a	WBGene00086568	Y2H9A.6	0.00416907	0.0550948	3.48934	1.21789	1.77177	4.47374	1.3606	-0.33423	0.864268	0.864268
B0284.2	WBGene00007132	pals-27	5.85486e-11	4.95312e-09	3.48697	0.532573	4.51737	3.98805	0.0310197	0.394432	0.0459679	0.394432
T23F2.4	WBGene00020737	T23F2.4	0.000353308	0.00737636	3.47305	0.972106	2.45902	4.75261	0.0952642	1.32222	0.409087	1.32222
B0334.1.2	WBGene00007142	ttr-18	5.35271e-05	0.00144327	3.45711	0.855791	6.78335	4.07747	1.08652	-0.47154	0.0120455	0.0120455
ZK938.10	WBGene00202513	ZK938.10	4.42985e-05	0.00121604	3.4395	0.842224	1.73626	3.72081	0.166489	0.0482057	0.897523	0.897523
C45B2.3	WBGene00016660	C45B2.3	2.15091e-07	1.01133e-05	3.43878	0.663116	4.26503	4.07524	0.0420302	0.617553	0.0577852	0.617553
Y119D3B.18	WBGene00022494	fbxa-91	0.000139833	0.00333563	3.43162	0.901052	1.85365	4.38919	0.425905	0.644572	0.791936	0.791936
W06D12.4	WBGene00006137	str-77	0.000504647	0.00998631	3.42589	0.984938	1.35619	3.7418	0.118326	0.157658	1.33683	1.33683
B0507.17	WBGene00235307	B0507.17	1.85853e-05	0.000565183	3.41565	0.797818	1.85828	4.00946	0.166757	0.470057	0.788014	0.788014
F25B3.5b.1	WBGene00009102	F25B3.5	0.000301616	0.00643287	3.41166	0.944037	2.61381	4.56128	0.881124	0.455684	0.344354	0.455684
C54F6.14.1	WBGene00001500	ftn-1	7.02471e-05	0.00184172	3.40544	0.856618	2.66532	4.35966	0.618697	0.481995	0.325114	0.481995
T16G1.7	WBGene00011801	T16G1.7	1.06667e-46	1.42789e-43	3.39487	0.236578	4.3754	3.4996	0.0319979	0.0205633	0.0519558	0.0519558
T28A11.4	WBGene00020871	T28A11.4	0.000681742	0.012875	3.38402	0.996232	1.33525	3.75524	0.122651	0.277052	1.36607	1.36607
F25B3.5a.1	WBGene00009102	F25B3.5	0.00383958	0.0517944	3.38329	1.17026	3.99148	5.07741	0.49843	1.55584	0.0761464	1.55584
B0222.7	WBGene00000718	col-145	0.000615869	0.0118373	3.3721	0.98469	2.50346	4.57485	0.102366	1.35206	0.389386	1.35206
K01C8.1.1	WBGene00010456	K01C8.1	4.94124e-05	0.00134507	3.3717	0.830797	5.0693	4.23877	0.55015	0.485186	0.0325531	0.485186
Y52D5A.1	WBGene00021792	Y52D5A.1	0.00366654	0.0497552	3.36391	1.15777	0.988806	3.8756	0.0654681	0.535585	1.94517	1.94517
F14F8.8	WBGene00008816	F14F8.8	0.00023872	0.00527431	3.35444	0.913003	1.52901	3.85639	0.133591	0.467312	1.11677	1.11677
F52E1.8	WBGene00018696	pho-6	1.46806e-29	7.95442e-27	3.34776	0.296521	5.55443	3.46775	0.0105333	0.121353	0.0240916	0.121353
C04G6.2	WBGene00015453	C04G6.2	8.82739e-10	6.35712e-08	3.34238	0.545313	2.72806	3.49908	0.142946	0.0415996	0.303103	0.303103
K08E7.7b	WBGene00000841	cul-6	0.0090639	0.0990241	3.34053	1.28008	3.47752	5.31407	1.55072	0.907181	0.131916	0.907181
F47D12.1a	WBGene00001518	gar-2	0.00808488	0.0907684	3.31984	1.25348	2.19955	5.19186	0.34884	2.00797	0.544581	2.00797
C38D9.7	WBGene00008015	fbxa-174	3.29751e-07	1.49783e-05	3.29399	0.645171	2.5289	3.39571	0.245847	-0.0700826	0.378523	0.378523
C50D2.1b	WBGene00016805	C50D2.1	0.0090187	0.0987198	3.29286	1.26098	2.19316	5.16097	0.802693	1.58242	0.548403	1.58242
K08D12.7	WBGene00044293	K08D12.7	0.00664901	0.078475	3.27414	1.20642	2.02226	4.96252	0.0239779	2.15919	0.660496	2.15919
C53A5.9	WBGene00008267	C53A5.9	1.13749e-05	0.000365103	3.25493	0.741572	1.97213	3.69858	0.127633	0.522617	0.69726	0.69726
F30H5.2	WBGene00003770	nlp-32	1.05056e-06	4.31547e-05	3.25203	0.666137	2.42465	3.68745	0.240629	0.402793	0.424979	0.424979
C03G6.14	WBGene00015399	cyp-35A1	0.00664245	0.0784444	3.23277	1.19103	0.92324	3.16885	0.0501875	-0.00819142	2.07766	2.07766
F55C5.2	WBGene00010092	F55C5.2	0.00172932	0.0277336	3.22779	1.0302	1.25714	3.44949	0.11145	0.293432	1.48052	1.48052
B0213.4	WBGene00003767	nlp-29	5.03416e-13	5.56128e-11	3.22066	0.445805	7.21458	3.35029	0.00204057	0.296072	0.0102319	0.296072
T27E7.6	WBGene00012091	pals-29	8.01249e-05	0.00207075	3.21868	0.81609	1.79818	3.39322	0.158716	0.197849	0.840287	0.840287
C49G7.5	WBGene00016783	irg-2	2.06477e-09	1.42388e-07	3.20309	0.534505	6.1876	3.42077	0.00639232	0.422151	0.0165999	0.422151
F55A12.6	WBGene00018865	F55A12.6	0.000438741	0.00887506	3.20206	0.910812	3.63847	4.07146	0.105268	1.1391	0.110728	1.1391
E02C12.10	WBGene00017095	E02C12.10	0.000125806	0.00303925	3.19485	0.83318	1.77792	3.55083	0.182652	0.428226	0.858632	0.858632
Y40B10B.1	WBGene00021494	Y40B10B.1	0.00227553	0.034431	3.18095	1.04235	1.23372	3.17721	0.113214	0.0638982	1.51654	1.51654
F30D4.1	WBGene00023278	F30D4.1	0.00861524	0.0953121	3.17059	1.20694	0.892145	3.03906	0.0416954	-0.0125933	2.14337	2.14337
C26D10.7	WBGene00023420	C26D10.7	1.25947e-09	8.95682e-08	3.16833	0.521752	3.65268	3.33817	0.097542	0.310796	0.109041	0.310796
F34H10.9	WBGene00219417	F34H10.9	0.00256218	0.037936	3.15945	1.0476	1.22297	3.16953	0.112862	0.105744	1.53333	1.53333
C45B2.8	WBGene00016662	C45B2.8	1.28274e-05	0.000404872	3.14505	0.72084	5.13923	3.59093	0.0189237	0.760492	0.0313057	0.760492
C37A5.8	WBGene00007992	fipr-24	4.30849e-05	0.00118559	3.11793	0.762278	1.93112	3.37852	0.142848	0.434739	0.728754	0.728754
F25H8.5h	WBGene00001113	dur-1	0.00328659	0.0462542	3.10961	1.05784	1.87456	4.14015	0.904154	0.644899	0.774394	0.774394
T28A11.20	WBGene00020882	T28A11.20	2.10258e-05	0.000623027	3.09522	0.727652	2.24192	3.50949	0.0839551	0.710261	0.519873	0.710261
Y59E9AL.3	WBGene00021993	Y59E9AL.3	0.00345826	0.0479531	3.09363	1.0581	1.83519	4.21466	0.739914	0.939447	0.807727	0.939447
F16B4.7	WBGene00017509	F16B4.7	3.78066e-07	1.6804e-05	3.09161	0.608623	3.7094	3.31192	0.0721171	0.483515	0.102579	0.483515
R09E10.13	WBGene00194658	R09E10.13	0.00382796	0.0516684	3.08837	1.0679	1.18743	3.23125	0.120484	0.341832	1.59013	1.59013
W08A12.4	WBGene00021081	pals-33	4.19978e-06	0.000149335	3.08406	0.670267	3.29064	3.39254	0.111416	0.56247	0.161972	0.56247
ZK666.6	WBGene00014046	clec-60	3.66012e-07	1.63641e-05	3.07904	0.605414	2.54275	3.04815	0.177056	0.0779526	0.372733	0.372733
ZK84.7	WBGene00002103	ins-20	0.000513471	0.0101345	3.07644	0.885655	1.5371	3.77767	0.0692332	1.10368	1.10734	1.10734
Y40B10A.6	WBGene00021491	comt-4	2.15583e-08	1.25474e-06	3.07501	0.549206	3.50321	3.19865	0.0565077	0.395933	0.128265	0.395933
F48C1.9	WBGene00018601	F48C1.9	2.57227e-11	2.26889e-09	3.0664	0.459786	4.11071	3.07453	0.0508112	0.266294	0.06739	0.266294
K11G9.1	WBGene00019652	K11G9.1	1.20642e-34	7.84416e-32	3.06247	0.249451	4.33089	2.84513	0.039131	0.000261731	0.054208	0.054208
T07A5.7	WBGene00045475	T07A5.7	4.78178e-07	2.0767e-05	3.04584	0.60495	5.09924	3.2223	0.0137701	0.535176	0.0320166	0.535176
R09B5.9	WBGene00000558	cnc-4	1.94272e-15	2.92785e-13	3.02979	0.381348	6.47291	2.9284	0.00338078	0.214759	0.0141713	0.214759
C48B4.4d	WBGene00000421	ced-7	0.00196251	0.0306076	3.00971	0.972177	5.35579	2.88484	1.39029	-1.18113	0.0274059	0.0274059
W04G3.12	WBGene00044151	W04G3.12	0.00516218	0.0643703	3.00619	1.07489	1.18322	2.89633	0.136105	0.0953712	1.59699	1.59699
F49E11.10a.1	WBGene00009895	scl-2	6.11148e-45	6.95395e-42	2.99903	0.213206	6.14099	2.75281	0.0483035	0.0198814	0.017034	0.0198814
F59B10.4a	WBGene00010320	F59B10.4	0.00020602	0.00463739	2.99539	0.807052	4.66017	2.97388	0.935599	-0.582884	0.0414013	0.0414013
B0213.15a	WBGene00015044	cyp-34A9	8.71956e-13	9.31967e-11	2.98974	0.418184	5.2463	2.73698	0.232914	-0.163653	0.0294028	0.0294028
C05E4.14c	WBGene00005228	srh-2	0.00509577	0.0638571	2.98762	1.06666	1.30147	3.16027	0.292129	0.311004	1.41451	1.41451
Y41G9A.10	WBGene00044901	Y41G9A.10	9.24484e-06	0.000304024	2.9871	0.673663	6.73864	3.22142	0.00406955	0.676663	0.0123101	0.676663
B0213.5	WBGene00003768	nlp-30	4.37763e-06	0.000154401	2.98433	0.649813	5.61012	3.17857	0.0105198	0.622865	0.0232636	0.622865
T10C6.15a	WBGene00050899	T10C6.15	0.00513086	0.0640644	2.97104	1.06158	2.14937	3.52365	1.11514	-0.0207158	0.575281	0.575281
ZC196.1	WBGene00022545	ZC196.1	3.21924e-10	2.46667e-08	2.95237	0.469537	3.11745	2.81667	0.1345	0.11765	0.196198	0.196198
R08H2.1.1	WBGene00000986	dhs-23	7.5049e-20	1.8768e-17	2.95215	0.323697	3.78216	2.67373	0.062275	0.011689	0.0948944	0.0948944
ZK970.6	WBGene00001532	gcy-5	2.37807e-05	0.000696495	2.95168	0.698445	3.34316	3.19911	0.137808	0.593929	0.15287	0.593929
C39B5.9	WBGene00016527	fbxa-47	4.84861e-07	2.09374e-05	2.9458	0.585389	2.64636	2.83018	0.181949	0.101625	0.33207	0.33207
F49A5.8	WBGene00005770	srw-23	0.00359894	0.0492786	2.94235	1.01065	1.28675	2.91455	0.0960082	0.300646	1.43613	1.43613
ZC47.10	WBGene00013842	fbxa-34	5.48822e-26	2.27083e-23	2.93582	0.278469	4.08849	2.67877	0.0377286	0.0785886	0.0689275	0.0785886
F59E11.8	WBGene00019114	nhr-194	0.00337512	0.0471284	2.93487	1.00121	1.73565	3.7634	0.60551	0.868704	0.89811	0.89811
Y50D4B.7	WBGene00021746	Y50D4B.7	4.72207e-05	0.0012947	2.92271	0.718291	2.17674	2.69926	0.215573	-0.0448355	0.55834	0.55834
Y80D3A.7a	WBGene00004236	ptr-22	2.34197e-20	5.98834e-18	2.90146	0.313825	4.456	2.64373	0.0519765	0.095753	0.0483461	0.095753
F47E1.2	WBGene00018566	F47E1.2	8.09412e-15	1.11635e-12	2.89735	0.373077	5.76002	2.68541	0.00865136	0.200128	0.0212233	0.200128
F09C6.11b	WBGene00044181	F09C6.11	0.00906201	0.0990241	2.89631	1.10982	1.09824	2.67609	0.106207	0.0931646	1.74136	1.74136
C06E4.8	WBGene00015537	C06E4.8	1.82375e-25	6.91718e-23	2.89569	0.277652	4.01855	2.57749	0.0415892	0.0358841	0.0740465	0.0740465
F46C3.6	WBGene00045253	F46C3.6	2.79618e-14	3.51561e-12	2.89374	0.380383	4.88998	2.68574	0.0165102	0.200527	0.0359531	0.200527
F54B8.4b	WBGene00010019	F54B8.4	7.0406e-16	1.11116e-13	2.89289	0.358483	4.90554	2.63255	0.157126	-0.00473909	0.0356387	0.0356387
Y94H6A.2	WBGene00022375	Y94H6A.2	6.00803e-08	3.22464e-06	2.88286	0.532034	3.35437	2.83294	0.101115	0.323476	0.150996	0.323476
F59E11.7a	WBGene00019113	F59E11.7	1.56226e-08	9.4303e-07	2.8772	0.508827	4.07137	2.79418	0.117163	0.271194	0.0701411	0.271194
C26F1.2	WBGene00016147	cyp-32A1	5.24762e-19	1.21857e-16	2.85889	0.320974	5.58014	2.5756	0.00750684	0.14703	0.0237043	0.14703
C17H1.8a	WBGene00007661	pals-7	0.00365803	0.0497185	2.83922	0.97694	1.33625	3.17522	0.0669638	0.879117	1.36466	1.36466
F57G8.7	WBGene00010216	F57G8.7	0.00117929	0.0201934	2.8373	0.874672	3.89861	3.33314	0.0423501	1.10523	0.0838907	1.10523
Y39A3A.4	WBGene00021435	Y39A3A.4	1.39553e-14	1.83572e-12	2.83222	0.367975	4.20999	2.56893	0.0322944	0.170814	0.0610049	0.170814
K10D3.8	WBGene00219281	K10D3.8	0.00758895	0.0866977	2.79223	1.04585	1.24791	2.89294	0.146075	0.546386	1.49462	1.49462
T22G5.7	WBGene00004997	spp-12	0.00513202	0.0640644	2.78966	0.996794	1.38131	2.50786	0.187888	0.0286133	1.30251	1.30251
W02F12.8	WBGene00175027	W02F12.8	1.88513e-05	0.000571236	2.78121	0.650107	2.47099	2.35128	0.230273	-0.191851	0.403686	0.403686
F41E7.4	WBGene00009620	fip-5	6.89606e-24	2.30785e-21	2.76691	0.274543	5.9729	2.38719	0.00603188	0.107029	0.0187297	0.107029
K04E7.3	WBGene00003551	nas-33	1.51515e-34	9.57786e-32	2.76374	0.225457	4.46305	2.32869	0.0281886	0.018335	0.0480577	0.0480577
F22G12.1	WBGene00009061	pals-14	4.83961e-06	0.000168145	2.75649	0.602958	3.45243	2.71575	0.0658094	0.479527	0.135589	0.479527
ZK337.1c.2	WBGene00013969	tep-1	3.33141e-10	2.53555e-08	2.74436	0.436825	6.46164	2.48843	0.181746	0.104478	0.01426	0.104478
F21H7.12	WBGene00009033	F21H7.12	0.000547217	0.010671	2.7413	0.793082	1.88089	3.00919	0.111761	0.831709	0.769153	0.831709
C54F6.5	WBGene00016923	C54F6.5	1.47394e-05	0.000455122	2.73824	0.632016	4.01395	2.72872	0.0548888	0.544278	0.0743983	0.544278
ZK1251.2b	WBGene00002090	ins-7	1.0005e-05	0.000324335	2.73636	0.619498	4.68767	2.47055	0.53502	-0.254711	0.0406472	0.0406472
C45B2.2	WBGene00016659	C45B2.2	7.29677e-07	3.04684e-05	2.73198	0.551548	5.23749	2.60416	0.0190765	0.437231	0.0295604	0.437231
Y50D4B.9	WBGene00268189	Y50D4B.9	0.000526195	0.0103229	2.72902	0.78713	1.8351	2.69186	0.121559	0.450427	0.807801	0.807801
M162.5	WBGene00010931	M162.5	7.62984e-11	6.29103e-09	2.72402	0.418583	4.41836	2.43634	0.0230034	0.239814	0.0499569	0.239814
F21H7.3	WBGene00009029	F21H7.3	5.39148e-17	9.73761e-15	2.71248	0.323769	4.37722	2.33305	0.0309859	0.126253	0.0518676	0.126253
Y39G8B.5	WBGene00012726	Y39G8B.5	1.05684e-10	8.62025e-09	2.71201	0.419908	3.92389	2.41809	0.0380041	0.22648	0.0816974	0.22648
F43C1.7	WBGene00023423	F43C1.7	3.3706e-13	3.81615e-11	2.71039	0.372373	4.07596	2.37026	0.0378435	0.170149	0.0698133	0.170149
C02E7.10	WBGene00015342	C02E7.10	0.002184	0.0332927	2.70569	0.883059	1.61272	2.5333	0.146899	0.274432	1.02279	1.02279
K08E7.7a	WBGene00000841	cul-6	1.0972e-11	1.00681e-09	2.69773	0.397126	5.81791	2.37257	0.0452389	0.191324	0.020502	0.191324
T16G1.6	WBGene00011800	T16G1.6	2.75232e-24	9.49008e-22	2.67351	0.262932	4.39436	2.22726	0.0283682	0.0753312	0.0510514	0.0753312
T17A3.1	WBGene00006894	ver-1	8.36333e-22	2.34968e-19	2.67237	0.278507	5.03991	2.23554	0.0148013	0.101548	0.0330847	0.101548
T10E10.6	WBGene00000743	col-170	0.00479068	0.0610423	2.67138	0.947036	1.47067	3.04409	0.158348	0.970659	1.18697	1.18697
C49G7.8	WBGene00016786	cyp-35A4	1.88661e-15	2.88145e-13	2.65955	0.334595	3.65226	2.20803	0.0588396	0.048741	0.109091	0.109091
F56D2.4	WBGene00006731	uev-2	0.00114802	0.0197738	2.65676	0.817091	2.10588	2.91869	0.0857978	0.915659	0.603197	0.915659
R09B5.3a.2	WBGene00000556	cnc-2	8.14852e-05	0.00210245	2.65162	0.673002	5.86302	2.35607	0.659435	-0.35101	0.0199632	0.0199632
F52F10.2	WBGene00018706	F52F10.2	2.2354e-07	1.04646e-05	2.63625	0.509065	2.84424	2.13496	0.122554	-0.0600332	0.266167	0.266167
T08A9.2	WBGene00020335	ttr-30	1.11273e-11	1.01696e-09	2.62685	0.386808	6.07569	2.24965	0.00457925	0.219851	0.0176674	0.219851
T10C6.15b	WBGene00050899	T10C6.15	0.000749238	0.0139187	2.62384	0.778379	3.25067	2.7924	0.426791	0.48202	0.169272	0.48202
W09G12.7	WBGene00021121	W09G12.7	0.000825577	0.0150663	2.62019	0.783531	6.85956	2.79632	0.00261818	0.918263	0.0116302	0.918263
F07C4.12b	WBGene00017205	F07C4.12	0.0077798	0.0881954	2.61631	0.983027	1.55327	3.21313	0.0925521	1.35696	1.08873	1.35696
Y44E3B.2	WBGene00021553	tyr-5	3.82353e-17	7.01711e-15	2.60734	0.309727	4.46281	2.15458	0.0235311	0.120365	0.0480677	0.120365
F44C4.2	WBGene00018412	nhr-37	0.00177743	0.0283853	2.60155	0.832468	2.09083	2.86202	0.121328	0.918177	0.613148	0.918177
Y58A7A.3.1	WBGene00021977	Y58A7A.3	2.7441e-10	2.13131e-08	2.59482	0.411055	7.90269	2.22268	0.0221644	0.231284	0.00896806	0.231284
Y41G9A.5b	WBGene00021529	Y41G9A.5	0.00106466	0.0185801	2.58768	0.790647	5.85117	2.75897	0.327326	0.610358	0.0201029	0.610358
F53A10.2d.1	WBGene00018734	F53A10.2	4.78027e-05	0.00130582	2.57642	0.633631	4.62317	2.47316	0.376408	0.225824	0.0424734	0.225824
Y45G5AM.3a.2	WBGene00021556	Y45G5AM.3	2.29033e-10	1.7911e-08	2.57358	0.405896	6.02299	2.1847	0.0123625	0.234765	0.0182016	0.234765
B0286.2b	WBGene00002252	lat-2	1.43366e-05	0.00044389	2.57087	0.592553	4.08307	2.21708	0.457369	-0.164537	0.0693093	0.0693093
Y43F8C.1	WBGene00003763	nlp-25	1.67901e-06	6.57647e-05	2.55102	0.532721	4.15297	2.29286	0.031845	0.393843	0.0645774	0.393843
Y50D4B.6	WBGene00021745	Y50D4B.6	3.11632e-17	5.86101e-15	2.54827	0.301852	4.68159	2.05744	0.0154984	0.121174	0.0408109	0.121174
F56D6.10	WBGene00044472	dct-8	0.000346795	0.0072537	2.54777	0.712149	4.34405	2.55592	0.0371449	0.723589	0.0535271	0.723589
K01A6.4	WBGene00010446	K01A6.4	0.00106927	0.0186319	2.53985	0.776325	1.88799	2.50137	0.140699	0.566938	0.763321	0.763321
C42D4.3	WBGene00016596	C42D4.3	3.99201e-07	1.76744e-05	2.51939	0.496985	3.79977	2.20059	0.0489411	0.321551	0.0931317	0.321551
F12A10.9	WBGene00077704	F12A10.9	0.0026626	0.0390669	2.51005	0.835506	1.97661	2.72778	0.195236	0.851869	0.693897	0.851869
K02G10.15	WBGene00206361	K02G10.15	2.59359e-07	1.19592e-05	2.50906	0.48712	4.3919	2.17336	0.0227777	0.333151	0.0511666	0.333151
B0281.1	WBGene00015108	B0281.1	0.00582818	0.0709641	2.49834	0.906082	1.60968	2.24008	0.2054	0.254066	1.02608	1.02608
R07C12.1	WBGene00019931	R07C12.1	1.82236e-07	8.74926e-06	2.49425	0.478137	4.12633	2.14072	0.0329288	0.309993	0.0663335	0.309993
K01A6.8	WBGene00194869	K01A6.8	0.00297604	0.0426484	2.49366	0.839558	2.22273	2.71133	0.0563761	1.00091	0.530929	1.00091
C45B11.2	WBGene00008105	C45B11.2	7.56206e-11	6.28065e-09	2.49206	0.382861	4.76868	2.03901	0.0149481	0.204925	0.0386083	0.204925
C17H1.9	WBGene00007662	pals-8	0.00419602	0.0553558	2.49139	0.87019	1.77711	1.98817	0.276476	-0.118889	0.85937	0.85937
C09D4.5.1	WBGene00004431	rpl-19	4.42158e-14	5.46858e-12	2.48227	0.328866	5.56439	1.97828	0.0284041	0.133825	0.0239405	0.133825
Y45G5AM.3a.1	WBGene00021556	Y45G5AM.3	6.41137e-05	0.00169066	2.47855	0.620082	4.46129	2.28254	0.528623	0.0208448	0.0481295	0.0481295
C08H9.7	WBGene00007467	chil-3	1.2285e-06	4.9569e-05	2.47431	0.510063	2.96894	1.90071	0.15872	-0.0786534	0.231526	0.231526
F55H2.8	WBGene00219298	F55H2.8	6.48667e-06	0.000221648	2.44284	0.541665	2.75201	1.90775	0.145008	0.00187538	0.295093	0.295093
T04H1.9	WBGene00006539	tbb-6	9.8593e-21	2.63962e-18	2.43749	0.261042	5.99216	1.86418	0.00397468	0.0982398	0.0185242	0.0982398
R11G11.14	WBGene00020016	lipl-3	1.31217e-14	1.7361e-12	2.43354	0.315854	3.72964	1.84605	0.0492708	0.037491	0.100375	0.100375
Y48G9A.10	WBGene00021703	cpt-3	7.88678e-09	4.99538e-07	2.4306	0.421185	4.37038	1.98522	0.0260423	0.240052	0.0522015	0.240052
Y6E2A.4	WBGene00012398	Y6E2A.4	5.24016e-05	0.00141474	2.42009	0.598343	2.57331	2.18666	0.150078	0.386943	0.36026	0.386943
Y17G9A.1	WBGene00006217	str-173	6.08303e-05	0.00161908	2.41616	0.6026	2.53883	2.10424	0.170328	0.270776	0.374362	0.374362
E04D5.4a	WBGene00008483	E04D5.4	1.11932e-07	5.70545e-06	2.41555	0.455231	4.48415	1.99915	0.0857488	0.225104	0.0472192	0.225104
Y54F10BL.1	WBGene00044676	fbxa-42	9.37793e-12	8.67535e-10	2.41524	0.354362	4.52643	1.9007	0.0186491	0.169709	0.0456405	0.169709
ZK337.1a.3	WBGene00013969	tep-1	6.40202e-07	2.70415e-05	2.39349	0.480747	6.40096	1.8553	0.331927	-0.161094	0.0147495	0.0147495
T11B7.2a	WBGene00011707	T11B7.2	3.84212e-10	2.87616e-08	2.39345	0.382321	4.67901	1.89398	0.0234852	0.195769	0.040881	0.195769
C52E4.1	WBGene00000781	cpr-1	4.04118e-20	1.02183e-17	2.38259	0.259345	8.59996	1.78373	0.000272202	0.100618	0.00918374	0.100618
T16G1.4	WBGene00011798	T16G1.4	7.26966e-11	6.05991e-09	2.38174	0.365578	3.41467	1.84585	0.0591537	0.120908	0.141318	0.141318
F53H2.2	WBGene00010005	cnc-7	4.98207e-11	4.27838e-09	2.36816	0.360369	4.13989	1.83829	0.0267255	0.168073	0.0654325	0.168073
B0213.6	WBGene00003769	nlp-31	4.74118e-16	7.70679e-14	2.36641	0.291503	7.40886	1.78193	0.00110422	0.126357	0.00970068	0.126357
ZK337.1c.1	WBGene00013969	tep-1	2.66319e-05	0.000771072	2.36423	0.562843	5.86183	2.05702	0.20021	0.274979	0.0199772	0.274979
F09C6.11a	WBGene00044181	F09C6.11	0.00010443	0.00258035	2.36018	0.608284	2.48793	2.04206	0.158854	0.304796	0.396161	0.396161
F59A7.2	WBGene00019090	F59A7.2	7.4675e-13	8.05393e-11	2.34857	0.327528	3.66483	1.7092	0.0532913	0.0147878	0.107621	0.107621
EGAP1.3	WBGene00006987	zmp-1	2.42903e-13	2.80596e-11	2.34825	0.320678	5.27795	1.77769	0.00771711	0.146535	0.0288328	0.146535
F56D6.15	WBGene00044642	clec-69	0.00843646	0.0936529	2.32781	0.883726	1.61665	2.52276	0.152887	0.968551	1.01857	1.01857
C08H9.4b.2	WBGene00007465	chil-1	1.86018e-05	0.000565183	2.32231	0.542463	3.28777	1.66311	0.278913	-0.22244	0.162486	0.162486
C45E1.4	WBGene00016663	C45E1.4	4.00406e-13	4.48869e-11	2.31102	0.318523	4.74294	1.72399	0.0151208	0.137065	0.0392291	0.137065
B0507.9	WBGene00015226	B0507.9	0.00339561	0.0472975	2.29992	0.785103	1.87245	2.28337	0.148436	0.722159	0.776144	0.776144
C08H9.12	WBGene00007471	chil-6	0.000245117	0.00539857	2.27544	0.620466	2.51248	1.70091	0.191968	-0.00743889	0.385499	0.385499
H12D21.6	WBGene00010382	H12D21.6	0.00885654	0.0976021	2.2679	0.866423	1.64156	2.07892	0.133859	0.536029	0.992174	0.992174
C15H11.2a	WBGene00007614	gnrr-2	3.99544e-08	2.2069e-06	2.25334	0.410366	5.25115	1.56169	0.223285	-0.175258	0.0293157	0.0293157
F19B10.13	WBGene00194713	F19B10.13	0.00030502	0.00649937	2.24454	0.621583	3.51644	1.97502	0.0653729	0.514176	0.126426	0.514176
C33A12.19a	WBGene00007890	C33A12.19	6.72257e-10	4.90338e-08	2.23182	0.361576	5.17582	1.65119	0.00791593	0.18819	0.0306572	0.18819
Y2H9A.6b	WBGene00086568	Y2H9A.6	0.00745417	0.0855013	2.23013	0.833431	3.35992	1.66061	0.891835	-0.681134	0.150077	0.150077
T23E7.6	WBGene00044772	T23E7.6	5.04342e-07	2.16962e-05	2.22709	0.443233	4.22873	1.72373	0.0233652	0.271317	0.0598838	0.271317
R09B5.13	WBGene00044900	cnc-11	2.00492e-05	0.000598914	2.21601	0.51966	2.77839	1.69119	0.118554	0.15392	0.286516	0.286516
F35C11.6	WBGene00009405	F35C11.6	9.47648e-06	0.000309851	2.21483	0.500098	5.26732	1.77175	0.0105987	0.364548	0.0290249	0.364548
F45D3.4a.1	WBGene00009724	F45D3.4	1.66952e-06	6.55055e-05	2.21402	0.462238	7.60755	1.72697	0.00634984	0.314146	0.00930211	0.314146
F13A7.11	WBGene00008726	F13A7.11	0.000967247	0.0171698	2.20816	0.669162	5.73159	2.00012	0.00796382	0.663702	0.0215906	0.663702
C10H11.6a	WBGene00015695	ugt-26	6.62933e-70	1.67626e-66	2.20488	0.124752	6.38228	1.47713	0.00529761	0.0180469	0.0149039	0.0180469
F26G1.2b	WBGene00017838	F26G1.2	2.04492e-05	0.000609112	2.20344	0.517247	5.68258	1.77759	0.00865344	0.392663	0.0222447	0.392663
C54G10.4a	WBGene00008320	slc-25A29	0.000159074	0.00371667	2.20173	0.583015	3.85421	1.86218	0.156006	0.353854	0.0879082	0.353854
F28H7.6	WBGene00009239	irld-6	2.38789e-06	9.02677e-05	2.19341	0.464955	4.29193	1.70274	0.0242505	0.300024	0.0562889	0.300024
R53.7b	WBGene00011276	aakg-5	0.00434581	0.0566424	2.18728	0.766953	3.13777	1.89276	0.69051	-0.118628	0.191815	0.191815
F53A9.8	WBGene00018731	F53A9.8	1.42935e-25	5.60822e-23	2.17576	0.20816	6.56351	1.47217	0.00226842	0.0627273	0.0134849	0.0627273
F26D11.2	WBGene00017819	F26D11.2	0.00397078	0.0533094	2.17388	0.754695	2.07827	1.61962	0.232768	0.0196074	0.621578	0.621578
C54F6.6	WBGene00016924	C54F6.6	0.00233812	0.0351586	2.17235	0.713759	2.15495	1.94253	0.192389	0.466107	0.571789	0.571789
EGAP1.1	WBGene00017146	EGAP1.1	0.00540702	0.0666925	2.16368	0.777819	1.99941	1.6952	0.230486	0.132949	0.677018	0.677018
H13N06.2	WBGene00010396	H13N06.2	1.02704e-06	4.24179e-05	2.16257	0.442571	4.92359	1.63806	0.0105257	0.283278	0.0352796	0.283278
ZK84.1	WBGene00022649	ZK84.1	1.20286e-05	0.000382766	2.16256	0.494065	5.86075	1.69592	0.00460226	0.361548	0.0199898	0.361548
Y54F10BM.3	WBGene00021858	Y54F10BM.3	1.91102e-05	0.000577545	2.15714	0.50459	4.54562	1.70152	0.0187331	0.363184	0.0449657	0.363184
F16H11.1.1	WBGene00017530	F16H11.1	0.0004697	0.00938451	2.15668	0.616641	5.29158	1.45795	0.541784	-0.463578	0.0285856	0.0285856
K11G9.6	WBGene00003473	mtl-1	9.14978e-06	0.00030177	2.15305	0.485321	2.91622	1.54557	0.107726	0.0858765	0.245579	0.245579
F36G9.11	WBGene00009487	clec-232	4.7355e-06	0.000164779	2.13592	0.466748	2.99949	1.42067	0.10302	-0.0379959	0.22376	0.22376
K09D9.2	WBGene00019565	cyp-35A3	1.22071e-11	1.11118e-09	2.13261	0.31465	5.26557	1.48322	0.00765097	0.140856	0.0290564	0.140856
F47B8.2	WBGene00009803	F47B8.2	1.97228e-08	1.16277e-06	2.11973	0.377552	6.06123	1.51904	0.00391824	0.2099	0.0178119	0.2099
D1014.1	WBGene00006309	sul-2	4.38668e-09	2.86861e-07	2.1161	0.36056	4.7456	1.49936	0.0139955	0.18101	0.039164	0.18101
E02C12.6	WBGene00017092	E02C12.6	0.000126148	0.00304426	2.08218	0.543104	2.69327	1.45108	0.127322	0.0607149	0.315121	0.315121
K05B2.4	WBGene00019404	K05B2.4	1.16412e-07	5.88709e-06	2.08181	0.392865	3.63557	1.48539	0.0449564	0.186557	0.111076	0.186557
F26F12.3b.2	WBGene00017834	F26F12.3	0.000651614	0.012409	2.0816	0.610589	5.85563	1.53081	0.539179	-0.250564	0.0200501	0.0200501
C39B5.14.1	WBGene00189950	C39B5.14	0.00660706	0.0781932	2.0787	0.765347	1.99911	1.5084	0.201391	0.0637281	0.677242	0.677242
F13D12.3	WBGene00008739	F13D12.3	1.99106e-09	1.37824e-07	2.07513	0.345939	6.99577	1.43546	0.0013441	0.178167	0.0110052	0.178167
F58E2.3	WBGene00019047	F58E2.3	0.000138265	0.00330863	2.068	0.542605	4.51523	1.6363	0.0208273	0.420803	0.046046	0.420803
C34B7.3	WBGene00007913	cyp-36A1	1.50137e-07	7.42755e-06	2.05863	0.391941	6.3454	1.45573	0.00207394	0.228353	0.0152135	0.228353
K11D12.3a	WBGene00005655	srr-4	3.20699e-13	3.64908e-11	2.05728	0.282384	5.98037	1.36541	0.00540611	0.114205	0.0186496	0.114205
ZC196.2	WBGene00022546	ZC196.2	3.45341e-08	1.95381e-06	2.04254	0.370243	3.35662	1.35013	0.054997	0.0681827	0.150623	0.150623
T07H3.3	WBGene00020326	math-38	3.80238e-12	3.72977e-10	2.04121	0.293939	3.89032	1.35364	0.0448791	0.084721	0.0846252	0.084721
T27F6.8.2	WBGene00012107	T27F6.8	5.36404e-08	2.91335e-06	2.03877	0.374857	5.39873	1.4156	0.0115851	0.199192	0.0266377	0.199192
F15E6.8	WBGene00017488	dct-7	7.13571e-05	0.00186867	2.02686	0.510323	4.55893	1.54496	0.0217138	0.36893	0.0445122	0.36893
ZK337.1a.1	WBGene00013969	tep-1	0.000948935	0.0168842	2.02314	0.612099	5.80182	1.67752	0.3107	0.251298	0.020699	0.251298
F26G1.2a	WBGene00017838	F26G1.2	0.000376028	0.00777688	2.01721	0.567212	4.95005	1.60682	0.0234903	0.459104	0.034764	0.459104
F09C6.12	WBGene00044182	F09C6.12	5.61942e-12	5.35068e-10	2.01532	0.292543	4.06284	1.32116	0.0281339	0.100238	0.070755	0.100238
C34C6.7a	WBGene00007919	cup-16	7.99587e-05	0.0020701	1.99011	0.504526	4.70981	1.49362	0.0537811	0.328038	0.0400645	0.328038
C33G8.2	WBGene00016360	C33G8.2	0.00161677	0.0262431	1.98498	0.62958	6.86142	1.65769	0.00204108	0.592515	0.0116206	0.592515
K04F1.9a	WBGene00019388	K04F1.9	1.99536e-10	1.5877e-08	1.97702	0.31077	3.9116	1.28848	0.0337086	0.111158	0.0827557	0.111158
C23H3.7	WBGene00006611	tre-5	1.25441e-14	1.66939e-12	1.9684	0.255292	4.6949	1.24059	0.0129543	0.0848071	0.0404547	0.0848071
K09C8.4	WBGene00010716	lge-1	4.35038e-06	0.000153729	1.96658	0.428085	3.11218	1.3682	0.0775347	0.182423	0.197351	0.197351
F09C6.13	WBGene00044183	F09C6.13	3.62426e-17	6.70547e-15	1.96621	0.233393	4.33842	1.18763	0.027891	0.00690442	0.0538172	0.0538172
W06A11.1	WBGene00021052	W06A11.1	0.00668646	0.078719	1.95678	0.721508	4.58851	1.77339	0.0278707	0.752991	0.0435437	0.752991
M60.7	WBGene00019782	M60.7	0.000977657	0.0173006	1.95616	0.593336	4.65996	1.57042	0.0142885	0.513784	0.0414073	0.513784
C25F9.7	WBGene00005833	srw-86	0.00344197	0.0478198	1.94075	0.663452	2.41388	1.65816	0.191048	0.469206	0.430078	0.469206
T19C3.9	WBGene00020566	ttr-7	5.76353e-17	1.03276e-14	1.93594	0.231296	5.1212	1.18855	0.00984075	0.0704059	0.0316256	0.0704059
F10D7.3	WBGene00017340	F10D7.3	1.75593e-07	8.48399e-06	1.93562	0.370562	6.07103	1.28877	0.00296069	0.203014	0.0177138	0.203014
T16G1.5	WBGene00011799	T16G1.5	5.78505e-06	0.00019947	1.93524	0.42682	3.07464	1.30297	0.0674907	0.156786	0.205772	0.205772
F58H10.1	WBGene00010291	F58H10.1	2.88991e-06	0.000107198	1.93255	0.413071	4.93671	1.32518	0.0101468	0.245795	0.0350224	0.245795
C49G7.10a	WBGene00016788	C49G7.10	0.000647869	0.0123791	1.92305	0.563823	6.91486	1.49092	0.0173522	0.459493	0.0113579	0.459493
C14B1.3	WBGene00007574	C14B1.3	5.6978e-08	3.06536e-06	1.91746	0.353251	6.90364	1.25274	0.00160139	0.185578	0.0114111	0.185578
C18C4.9	WBGene00015969	glb-6	0.000740842	0.0137852	1.90628	0.56499	3.84291	1.47322	0.0378094	0.441011	0.0889649	0.441011
C10C5.2	WBGene00007506	C10C5.2	7.03875e-08	3.76011e-06	1.90603	0.353612	5.69766	1.23994	0.00426031	0.183302	0.0220405	0.183302
C46H11.4b	WBGene00002979	lfe-2	0.00363306	0.0495075	1.89983	0.653226	4.95066	1.59485	0.464184	0.175872	0.0347521	0.175872
B0564.3.1	WBGene00007203	best-1	0.000100648	0.00250316	1.89801	0.488042	5.10579	1.21734	0.325378	-0.154621	0.0318999	0.0318999
K09E4.6	WBGene00010723	cpg-7	4.07191e-06	0.000145242	1.88871	0.409906	5.27834	1.2718	0.00839206	0.243642	0.0288258	0.243642
C45E5.3	WBGene00016666	C45E5.3	0.000182591	0.00416772	1.88755	0.504429	2.84429	1.28399	0.115521	0.153396	0.266151	0.266151
F55G1.13	WBGene00018906	egas-4	0.000413772	0.00842991	1.86821	0.529068	2.74138	1.05153	0.121245	-0.115658	0.298623	0.298623
R13A5.3	WBGene00020047	ttr-32	3.83788e-07	1.70251e-05	1.8656	0.367473	6.24538	1.20618	0.00330755	0.199247	0.0160809	0.199247
M199.9	WBGene00044998	M199.9	2.86106e-12	2.85566e-10	1.85609	0.265748	5.10918	1.11827	0.00978949	0.0961438	0.0318395	0.0961438
B0564.6	WBGene00007206	B0564.6	8.62515e-09	5.39237e-07	1.8511	0.321607	4.55648	1.15208	0.00801143	0.147136	0.0445947	0.147136
B0564.9	WBGene00007208	B0564.9	8.62515e-09	5.39237e-07	1.8511	0.321607	4.55648	1.15208	0.00801143	0.147136	0.0445947	0.147136
T05C1.1	WBGene00020248	T05C1.1	9.35344e-05	0.0023546	1.85058	0.473684	4.4489	1.29664	0.0193405	0.317224	0.0486405	0.317224
C27B7.9	WBGene00007765	C27B7.9	2.34888e-17	4.52995e-15	1.84925	0.218198	7.49792	1.08305	0.000760982	0.0706544	0.0095042	0.0706544
C37A5.2	WBGene00007989	fipr-22	0.000650427	0.012409	1.84276	0.540451	4.46513	1.36923	0.0297404	0.40839	0.0479737	0.40839
M03A1.8	WBGene00077490	M03A1.8	6.64829e-11	5.60352e-09	1.83972	0.281804	3.88932	1.09302	0.0344059	0.0626466	0.0847142	0.0847142
C02A12.1	WBGene00001781	gst-33	1.01104e-08	6.26927e-07	1.8325	0.319872	3.60727	1.03388	0.0389444	-0.00587698	0.114533	0.114533
F01G10.3a	WBGene00001158	ech-9	0.0076114	0.0868234	1.83033	0.685814	3.80822	1.56944	0.020139	0.685372	0.0922989	0.685372
F01G10.3b	WBGene00001158	ech-9	0.0076114	0.0868234	1.83033	0.685814	3.80822	1.56944	0.020139	0.685372	0.0922989	0.685372
T07C4.9a	WBGene00003589	nex-2	1.36377e-05	0.000425725	1.82671	0.419971	7.41975	1.21272	0.00817315	0.256391	0.00967509	0.256391
T28C6.1c	WBGene00012118	grsp-2	9.30999e-06	0.000305285	1.82338	0.411357	6.16823	1.20047	0.00687416	0.246947	0.0167785	0.246947
M01D1.2a	WBGene00019699	math-34	2.53756e-06	9.56079e-05	1.8184	0.386476	3.28256	1.12518	0.0606229	0.105885	0.163422	0.163422
T12D8.5b	WBGene00011733	T12D8.5	0.000103501	0.00256297	1.81402	0.467263	4.62839	1.24921	0.0311429	0.296359	0.0423181	0.296359
Y51A2D.11.2	WBGene00013079	ttr-26	1.33837e-06	5.34337e-05	1.81388	0.375236	6.34057	1.15601	0.0135937	0.19761	0.0152545	0.19761
C08H9.11	WBGene00007470	chil-5	0.000212051	0.00474032	1.80877	0.488301	2.79657	1.05978	0.0769112	0.0209437	0.280746	0.280746
F14F7.3	WBGene00008810	cyp-13A12	5.16834e-07	2.21499e-05	1.80781	0.360124	3.4097	1.09598	0.0524439	0.0919714	0.142091	0.142091
Y39G10AR.6	WBGene00021464	ugt-31	3.51999e-31	2.10801e-28	1.80577	0.155489	5.22615	1.00644	0.00650219	0.0287462	0.029763	0.029763
F45E1.1.2	WBGene00018462	F45E1.1	0.000426807	0.00865673	1.80547	0.512491	4.94686	1.29309	0.0649196	0.329051	0.0348255	0.329051
C34D4.11a	WBGene00016403	grsp-3	8.40619e-08	4.39769e-06	1.80197	0.336302	3.54279	1.07344	0.046802	0.0773344	0.122847	0.122847
C54G10.4b.2	WBGene00008320	slc-25A29	4.84442e-07	2.09374e-05	1.79283	0.356259	5.33417	1.06097	0.162576	-0.0417042	0.0278044	0.0278044
C15C7.4	WBGene00015790	C15C7.4	2.62063e-07	1.2048e-05	1.78741	0.347147	4.35366	1.10307	0.0183141	0.162453	0.0530375	0.162453
Y53C12B.7	WBGene00013146	Y53C12B.7	0.000363285	0.00756385	1.7856	0.500812	3.60466	1.25748	0.0380329	0.338185	0.114857	0.338185
F35E12.4	WBGene00009428	F35E12.4	0.000624469	0.0119924	1.78513	0.521853	4.37957	1.28281	0.0179143	0.390582	0.0517536	0.390582
Y54E10BL.2	WBGene00000625	col-48	0.000120834	0.00294217	1.78077	0.463207	4.88232	1.20881	0.0114389	0.310402	0.0361098	0.310402
F52E4.5	WBGene00018702	F52E4.5	6.45585e-12	6.0709e-10	1.7784	0.258894	6.07155	1.02924	0.00399707	0.0965421	0.0177087	0.0965421
Y73B6BL.1	WBGene00022231	tyr-6	1.77061e-07	8.53684e-06	1.76981	0.338918	6.52739	1.0775	0.00210259	0.170195	0.0137526	0.170195
W07A12.6	WBGene00012323	oac-54	2.02872e-10	1.60862e-08	1.76796	0.278018	4.54133	1.03046	0.0173127	0.0986286	0.0451146	0.0986286
C34F11.8	WBGene00016417	C34F11.8	6.25553e-14	7.57218e-12	1.75677	0.234154	5.64829	0.991665	0.00508586	0.0771564	0.022719	0.0771564
F55C10.2	WBGene00000727	col-154	0.00874952	0.0965162	1.75277	0.668566	3.06845	1.45804	0.103901	0.56657	0.207194	0.56657
T02B11.4	WBGene00020156	T02B11.4	1.0014e-11	9.22627e-10	1.75026	0.257152	4.04662	0.981354	0.0272509	0.0506675	0.0719401	0.0719401
C06H5.2	WBGene00007393	fbxa-157	3.5677e-06	0.000129284	1.74885	0.377306	3.70498	0.971342	0.110473	-0.0432245	0.103067	0.103067
C07G3.2	WBGene00015574	irg-1	5.90763e-16	9.40139e-14	1.74427	0.215576	4.36076	0.931822	0.0170299	0.00682305	0.0526793	0.0526793
F01D4.8	WBGene00008490	F01D4.8	1.3846e-07	6.87976e-06	1.73984	0.330312	3.86395	1.03904	0.0252991	0.13836	0.0870089	0.13836
C06H2.7b	WBGene00007391	C06H2.7	1.84147e-05	0.000562501	1.73785	0.405728	5.05435	0.955697	0.214101	-0.152031	0.0328227	0.0328227
T27F6.8.1	WBGene00012107	T27F6.8	9.33427e-09	5.81193e-07	1.73698	0.302484	4.11314	1.0107	0.07002	0.061944	0.0672245	0.0672245
F25B3.4	WBGene00009101	F25B3.4	0.000225607	0.0050187	1.73063	0.4692	3.23833	1.1627	0.0500228	0.2802	0.171594	0.2802
T10D4.3	WBGene00020407	chil-24	3.33143e-06	0.000121108	1.72252	0.370495	5.22974	1.05485	0.00716484	0.198735	0.0296988	0.198735
C13G3.1	WBGene00007553	C13G3.1	0.0010021	0.0176782	1.72245	0.523552	5.74146	1.21898	0.00490035	0.40626	0.0214621	0.40626
C49G7.12a	WBGene00077593	C49G7.12	1.26288e-05	0.000399712	1.71986	0.393881	4.81449	1.07354	0.145874	0.0868396	0.0375579	0.0868396
T12D8.5a	WBGene00011733	T12D8.5	1.17913e-12	1.24229e-10	1.71509	0.241297	5.0801	0.952325	0.01741	0.069926	0.0323591	0.069926
T08A9.11b	WBGene00020339	ttr-59	1.61854e-14	2.10474e-12	1.71443	0.223297	6.77291	0.941612	0.00154791	0.0732444	0.0121059	0.0732444
R02E4.3	WBGene00044724	R02E4.3	0.000787719	0.0144916	1.71199	0.509964	2.7305	1.04966	0.0878162	0.12517	0.302279	0.302279
W02F12.2	WBGene00020947	W02F12.2	3.88995e-08	2.15386e-06	1.70887	0.310942	5.24309	0.992088	0.0060848	0.138942	0.0294602	0.138942
C34D4.1	WBGene00016397	maph-9	6.15381e-05	0.00163029	1.70049	0.424397	3.54126	1.08363	0.0401748	0.229994	0.12305	0.229994
R11G11.2	WBGene00003648	nhr-58	7.3583e-17	1.29808e-14	1.69561	0.203283	4.5349	0.912114	0.0159245	0.0460612	0.0453395	0.0460612
C03G6.15	WBGene00015400	cyp-35A2	1.95041e-28	9.64901e-26	1.68932	0.152735	7.33894	0.884139	0.000876164	0.0341159	0.00987549	0.0341159
Y6E2A.5	WBGene00012399	Y6E2A.5	0.000127222	0.00306693	1.68338	0.43932	3.05128	0.907149	0.0783044	-0.00702654	0.211199	0.211199
F09C6.3	WBGene00008617	F09C6.3	3.61511e-05	0.00101317	1.67861	0.406364	3.17797	0.920599	0.0642496	0.0298558	0.183448	0.183448
F26F12.5	WBGene00017836	F26F12.5	0.00472713	0.0605416	1.67418	0.592617	2.89365	1.2623	0.128071	0.398721	0.251857	0.398721
Y43C5A.3	WBGene00012783	Y43C5A.3	1.27637e-18	2.90465e-16	1.6741	0.19007	5.89124	0.884131	0.00334246	0.0508474	0.019636	0.0508474
R13A5.6	WBGene00020049	ttr-8	1.1204e-07	5.70545e-06	1.67062	0.314853	5.57594	0.95625	0.00505161	0.143647	0.023767	0.143647
M60.4b.2	WBGene00019780	M60.4	1.60481e-08	9.66152e-07	1.66988	0.295555	6.76527	0.941369	0.00568892	0.12534	0.0121507	0.12534
C26D10.5a	WBGene00001159	eff-1	0.000178439	0.00409964	1.66602	0.44454	5.22365	1.06982	0.137283	0.15914	0.0298075	0.15914
W03G1.7a	WBGene00000213	asm-3	0.0045649	0.0588697	1.6585	0.584755	4.07773	1.03295	0.44322	-0.183518	0.0696871	0.0696871
F27E5.7	WBGene00044035	F27E5.7	2.06189e-08	1.20934e-06	1.65543	0.295258	3.9181	0.926748	0.029781	0.100985	0.0821936	0.100985
T06D8.10	WBGene00011530	T06D8.10	0.000212316	0.00474157	1.65346	0.44641	4.55351	1.05931	0.0156127	0.28331	0.0446955	0.28331
F35G8.2	WBGene00044788	ttr-38	1.28442e-07	6.42409e-06	1.65286	0.312979	4.6987	0.937129	0.0123588	0.134575	0.0403543	0.134575
B0280.2	WBGene00015100	B0280.2	0.00138615	0.0230928	1.64997	0.516017	4.31752	1.13625	0.0172386	0.382171	0.0549106	0.382171
Y48E1B.9a	WBGene00013008	clec-146	7.42745e-22	2.11283e-19	1.64892	0.171627	6.13822	0.851033	0.00997163	0.0342123	0.0170602	0.0342123
C08F8.8	WBGene00003657	nhr-67	4.73063e-06	0.000164779	1.64616	0.359707	4.96978	0.968222	0.0102433	0.183841	0.0343867	0.183841
ZK507.4	WBGene00013980	dos-1	4.32347e-19	1.01432e-16	1.64409	0.184143	4.7487	0.824296	0.0117746	0.00495643	0.0390881	0.0390881
F43H9.4	WBGene00018400	F43H9.4	6.65181e-18	1.37614e-15	1.64266	0.190547	5.47542	0.853071	0.00534066	0.0491218	0.0253389	0.0491218
F21F8.2	WBGene00017677	asp-11	0.00781792	0.0885137	1.64259	0.617553	2.70858	1.26707	0.133357	0.438701	0.309776	0.438701
W09C2.3c	WBGene00003151	mca-1	0.00014217	0.0033772	1.63837	0.430657	6.1262	0.966041	0.261023	-0.0600728	0.0171748	0.0171748
F09C6.1	WBGene00008615	F09C6.1	0.000523178	0.0102726	1.63546	0.471503	2.87631	0.990557	0.0766845	0.158493	0.256789	0.256789
R06C1.6	WBGene00011060	R06C1.6	3.83985e-05	0.00106695	1.63488	0.397114	5.30146	0.991093	0.0075902	0.228959	0.0284055	0.228959
F53B7.7	WBGene00009969	F53B7.7	0.00260539	0.0384256	1.63483	0.542983	2.68613	1.1556	0.0912075	0.351039	0.317645	0.351039
Y17D7A.4	WBGene00012448	cyp-33D3	0.000111775	0.00274397	1.63401	0.422935	3.08258	0.892071	0.0643523	0.0494906	0.203959	0.203959
T05E7.4	WBGene00020260	T05E7.4	0.000179943	0.00412384	1.63066	0.435351	3.02511	1.00923	0.0668438	0.197545	0.217452	0.217452
F44F4.4	WBGene00004222	ptr-8	2.47252e-09	1.69479e-07	1.62997	0.273335	6.5815	0.886696	0.00169581	0.110373	0.0133546	0.110373
C05B5.8	WBGene00007324	C05B5.8	2.20871e-15	3.26387e-13	1.62996	0.205569	5.7701	0.847746	0.00442096	0.0589672	0.0210952	0.0589672
K07E1.1.1	WBGene00019489	K07E1.1	2.24152e-05	0.000659899	1.62809	0.38404	4.54602	0.972184	0.0816055	0.139625	0.0449521	0.139625
B0213.3	WBGene00003766	nlp-28	8.78083e-15	1.18944e-12	1.62012	0.208892	6.64467	0.839799	0.00158937	0.0638645	0.012914	0.0638645
T19B10.2.1	WBGene00011831	T19B10.2	2.94027e-13	3.3624e-11	1.61781	0.221705	7.19327	0.844173	0.0156968	0.058033	0.0102989	0.058033
Y43F8C.2	WBGene00003764	nlp-26	2.03889e-10	1.61108e-08	1.60261	0.252046	5.75487	0.846737	0.00484692	0.0904441	0.0212892	0.0904441
C06B3.6.2	WBGene00007365	C06B3.6	1.21797e-08	7.41758e-07	1.60028	0.28089	7.04062	0.862952	0.0013744	0.116974	0.0108309	0.116974
C32D5.8b	WBGene00016316	C32D5.8	1.11371e-08	6.84992e-07	1.60024	0.280132	7.63034	0.862396	0.00363371	0.114077	0.00926559	0.114077
F14F9.8	WBGene00044536	F14F9.8	0.00316088	0.0449857	1.59942	0.541874	2.63969	0.824693	0.105888	-0.0343233	0.334553	0.334553
C37A5.3	WBGene00014698	C37A5.3	1.11092e-05	0.000357584	1.59938	0.363961	3.37593	0.877981	0.0512421	0.0869748	0.14746	0.14746
ZK337.1a.2	WBGene00013969	tep-1	8.38115e-05	0.00215514	1.59388	0.405234	6.73979	0.959194	0.0510671	0.195255	0.0123031	0.195255
H32K16.1	WBGene00010421	slc-36.4	9.58588e-26	3.89546e-23	1.59339	0.151894	5.4738	0.789357	0.0057716	0.0288361	0.0253654	0.0288361
C34C6.7b	WBGene00007919	cup-16	7.43468e-05	0.00193582	1.59219	0.401872	4.15614	0.856382	0.177879	-0.0580512	0.0643725	0.0643725
ZC196.4	WBGene00022548	ZC196.4	1.86444e-06	7.24044e-05	1.5876	0.332999	3.48815	0.780725	0.0359403	-0.00521574	0.130392	0.130392
Y5H2B.5	WBGene00021167	cyp-32B1	2.98347e-17	5.70545e-15	1.57977	0.187017	4.64138	0.777193	0.0105257	0.0250857	0.0419374	0.0419374
ZK337.1b.2	WBGene00013969	tep-1	9.12144e-11	7.46679e-09	1.5773	0.243379	7.00092	0.817442	0.0464853	0.0423647	0.0109846	0.0423647
T23B12.11	WBGene00044553	T23B12.11	7.13426e-06	0.000239814	1.57646	0.351133	5.9636	0.893521	0.00362833	0.181313	0.01883	0.181313
W02D9.10	WBGene00012216	W02D9.10	0.000166849	0.00387844	1.5746	0.418271	5.98773	0.953751	0.00289815	0.259528	0.0185712	0.259528
F49C12.7c.1	WBGene00009877	F49C12.7	1.90708e-05	0.00057712	1.5674	0.3666	6.22195	0.832892	0.185305	-0.0654681	0.0162891	0.0162891
W01F3.2	WBGene00012185	W01F3.2	2.68735e-12	2.6941e-10	1.56441	0.223706	7.9485	0.79427	0.000431159	0.0746353	0.00894017	0.0746353
C24B9.9	WBGene00016052	dod-3	4.24277e-06	0.000150394	1.55516	0.338143	5.13503	0.862768	0.00831115	0.1632	0.0313801	0.1632
T26H5.9a	WBGene00044206	T26H5.9	3.55012e-09	2.35539e-07	1.54827	0.262245	5.3577	0.801665	0.00625333	0.0969051	0.0273712	0.0969051
F56D6.8	WBGene00044292	F56D6.8	0.00167815	0.0270465	1.54349	0.491248	4.18383	1.00429	0.0214503	0.340536	0.0626135	0.340536
F44G3.2	WBGene00009706	argk-1	0.00417037	0.0550948	1.54038	0.537657	3.67498	1.05872	0.0382739	0.395339	0.106449	0.395339
C08H9.10	WBGene00007469	chil-4	0.0029336	0.0421199	1.54024	0.517797	2.70411	0.853131	0.0908447	0.0859359	0.311326	0.311326
Y50E8A.16	WBGene00001817	haf-7	4.21614e-10	3.13552e-08	1.53621	0.245958	6.91676	0.780576	0.00108532	0.0896579	0.011349	0.0896579
T21E8.3	WBGene00004002	pgp-8	0.00348791	0.0481364	1.53602	0.525837	2.69226	0.808379	0.0992793	0.0264298	0.315477	0.315477
F16B4.9	WBGene00017510	nhr-178	0.000435408	0.00881546	1.5333	0.435888	3.70914	0.933298	0.0308987	0.254099	0.102608	0.254099
F44G3.6	WBGene00004809	skr-3	2.23943e-07	1.04646e-05	1.53328	0.296099	7.14321	0.810495	0.000877427	0.130634	0.0104632	0.130634
F15D3.8	WBGene00008858	pals-1	2.61373e-09	1.77554e-07	1.52836	0.256686	4.03725	0.775545	0.0261967	0.0672806	0.0726351	0.0726351
C35A5.2	WBGene00007946	ugt-33	1.73986e-07	8.42426e-06	1.52486	0.291829	3.72872	0.716208	0.0272727	-0.00396312	0.100474	0.100474
F15B9.1	WBGene00001387	far-3	3.27764e-09	2.18737e-07	1.52203	0.257227	6.26921	0.77437	0.0024831	0.0967659	0.015871	0.0967659
K02D7.5	WBGene00019300	swt-1	1.9256e-05	0.000580409	1.52084	0.35589	5.55267	0.845878	0.00541941	0.184567	0.0241184	0.184567
ZK1320.4	WBGene00014254	cyp-13A10	4.99056e-18	1.07142e-15	1.5168	0.17528	4.85917	0.717219	0.00949363	0.0242731	0.036591	0.036591
T20D4.10	WBGene00020616	T20D4.10	1.85465e-05	0.000565012	1.51661	0.354206	3.76523	0.840583	0.0332509	0.154942	0.0966241	0.154942
R09E12.9	WBGene00044514	R09E12.9	0.00176018	0.0281423	1.51618	0.484715	2.87159	0.755477	0.0942749	-0.0119732	0.258148	0.258148
T05E12.3	WBGene00011486	T05E12.3	1.97809e-15	2.96154e-13	1.51209	0.190374	6.23746	0.729412	0.00243677	0.0519266	0.016151	0.0519266
Y119D3B.20	WBGene00022496	fbxa-92	5.12407e-05	0.00138682	1.50842	0.372459	3.69766	0.769928	0.104207	0.00495543	0.103881	0.103881
W06A7.3g.1	WBGene00004336	ret-1	2.5086e-18	5.54255e-16	1.50811	0.172717	7.0622	0.718118	0.00960714	0.0351395	0.0107501	0.0351395
M03F8.1	WBGene00019761	M03F8.1	0.000404241	0.00827277	1.50161	0.424508	3.32191	0.892702	0.0877845	0.182527	0.156487	0.182527
K08H10.1a.2	WBGene00002263	lea-1	5.22098e-09	3.3754e-07	1.50056	0.256947	7.32189	0.754735	0.0308148	0.0682181	0.0099209	0.0682181
K09A11.3	WBGene00010706	cyp-14A2	7.4073e-14	8.91894e-12	1.50039	0.200575	4.52583	0.695048	0.0146835	0.00993807	0.045662	0.045662
F16B4.4	WBGene00017506	F16B4.4	8.99805e-37	6.60544e-34	1.49727	0.118202	8.29939	0.689315	0.000376272	0.0205812	0.00892186	0.0205812
C31A11.7	WBGene00007835	oac-7	7.276e-08	3.86869e-06	1.49603	0.277855	3.82007	0.759199	0.0246609	0.0850465	0.0911441	0.0911441
K11D12.4	WBGene00019644	cpt-4	1.63578e-07	8.00545e-06	1.49366	0.285236	5.03774	0.766937	0.00883945	0.1132	0.0331244	0.1132
VK10D6R.1	WBGene00012152	cnc-10	4.13849e-33	2.54539e-30	1.49319	0.124563	5.84936	0.674784	0.00314969	0.00422919	0.0201243	0.0201243
Y5H2A.2	WBGene00021163	nhr-275	0.00399162	0.0534967	1.48419	0.515553	2.73055	0.721662	0.0964343	-0.020411	0.302259	0.302259
Y75B8A.35b.2	WBGene00006986	zip-1	0.000490357	0.0097459	1.48262	0.425312	5.32229	0.738643	0.243312	-0.144323	0.0280236	0.0280236
F28D1.5.1	WBGene00009215	thn-2	2.31306e-19	5.54087e-17	1.47951	0.164439	7.52498	0.689131	0.00124602	0.0393142	0.00945024	0.0393142
F12E12.11	WBGene00044811	F12E12.11	9.24554e-10	6.63725e-08	1.47806	0.241438	4.82731	0.725351	0.00966675	0.0777715	0.0372751	0.0777715
T13H10.2	WBGene00011762	T13H10.2	0.000331436	0.00696445	1.47292	0.410352	3.11328	0.789946	0.0554735	0.118399	0.19711	0.19711
W05B10.4	WBGene00012279	W05B10.4	1.18031e-09	8.42015e-08	1.47285	0.24213	4.20625	0.72114	0.0197965	0.0681439	0.0612317	0.0681439
F55H2.1b	WBGene00004933	sod-4	6.62949e-13	7.21853e-11	1.47036	0.20459	4.61356	0.687836	0.020022	0.0290367	0.0427636	0.0427636
T28A11.19	WBGene00020881	T28A11.19	2.19917e-07	1.03189e-05	1.46768	0.283245	4.16612	0.742497	0.0188268	0.101515	0.0637315	0.101515
Y36E3A.2	WBGene00194708	Y36E3A.2	0.000579331	0.0112298	1.46419	0.4255	3.21901	0.86042	0.0513868	0.220189	0.175298	0.220189
K08H10.1m	WBGene00002263	lea-1	2.08599e-13	2.43441e-11	1.45678	0.198386	7.48862	0.68389	0.0160382	0.0429972	0.00952334	0.0429972
T19B10.2.2	WBGene00011831	T19B10.2	6.01342e-22	1.75445e-19	1.45454	0.151054	6.73359	0.651866	0.0218849	-0.000436831	0.0123409	0.0123409
C25E10.4	WBGene00016094	C25E10.4	1.84889e-08	1.09857e-06	1.45396	0.258455	3.93991	0.652032	0.0198579	0.00243164	0.0803409	0.0803409
F41C3.2	WBGene00018268	F41C3.2	0.000210376	0.00471604	1.44606	0.39017	6.576	0.810003	0.00189064	0.226459	0.0133942	0.226459
C32D5.8a	WBGene00016316	C32D5.8	2.76046e-07	1.26653e-05	1.4441	0.281003	7.27006	0.720387	0.00665087	0.111793	0.0100656	0.111793
C28A5.3	WBGene00003590	nex-3	2.09475e-07	9.89008e-06	1.4425	0.277899	6.25974	0.716916	0.00208915	0.113753	0.0159543	0.113753
F28H7.8	WBGene00009241	F28H7.8	2.14441e-13	2.48981e-11	1.43962	0.196147	5.60194	0.667916	0.00416056	0.0535499	0.0233827	0.0535499
C49C8.2	WBGene00016766	C49C8.2	1.93141e-05	0.00058139	1.43858	0.336692	3.49326	0.678864	0.0403761	0.0321403	0.129666	0.129666
K03H6.7	WBGene00044719	clec-172	0.00702732	0.0818427	1.4287	0.530021	2.68005	0.639063	0.101574	-0.0681853	0.319809	0.319809
W09C2.3b	WBGene00003151	mca-1	3.79282e-06	0.000136572	1.42495	0.308268	7.03855	0.723176	0.0683222	0.0742216	0.0108388	0.0742216
F25D1.5	WBGene00009110	F25D1.5	1.62154e-09	1.13194e-07	1.42426	0.236125	4.12907	0.630036	0.0174819	0.00937336	0.0661507	0.0661507
K07C11.5.1	WBGene00019478	cri-2	1.26869e-11	1.15026e-09	1.4199	0.209667	6.35676	0.657584	0.00890535	0.0570348	0.0151175	0.0570348
B0213.16	WBGene00015045	cyp-34A10	0.000100756	0.00250316	1.41739	0.364484	3.29885	0.676026	0.0387582	0.0529	0.160514	0.160514
C37C3.13.1	WBGene00016505	ttr-33	1.36635e-05	0.000425945	1.41544	0.325447	6.09001	0.728137	0.0114079	0.147466	0.0175259	0.147466
F15H10.2	WBGene00000602	col-13	9.19092e-06	0.000302689	1.41387	0.31877	4.39076	0.656922	0.101201	-0.0296813	0.0512202	0.0512202
C55B6.1b	WBGene00016939	C55B6.1	0.00553849	0.0679824	1.4062	0.506935	3.31657	0.647568	0.228062	-0.160124	0.157412	0.157412
T10H4.11	WBGene00011699	cyp-34A2	4.65758e-14	5.72932e-12	1.39945	0.185574	4.73247	0.627604	0.0121683	0.0379155	0.0394885	0.0394885
F49E12.10	WBGene00009903	F49E12.10	0.000208887	0.00469264	1.39235	0.375496	3.26365	0.711103	0.04463	0.117264	0.166866	0.166866
F52E10.4c	WBGene00009935	F52E10.4	5.56011e-05	0.00149388	1.39178	0.345293	3.89283	0.724192	0.0305247	0.148316	0.084402	0.148316
T07A5.1	WBGene00011554	T07A5.1	3.82237e-08	2.1216e-06	1.38593	0.252039	4.01969	0.63386	0.021326	0.0507	0.0739594	0.0739594
T19C4.7	WBGene00003771	nlp-33	3.11109e-05	0.000887206	1.38442	0.332379	6.99188	0.707555	0.00126439	0.164449	0.0110209	0.164449
K02F3.4.1	WBGene00019327	zip-2	0.00332854	0.0466434	1.38214	0.470814	3.9453	0.839096	0.131655	0.200844	0.0798902	0.200844
C01B4.8a	WBGene00015272	C01B4.8	0.00136799	0.0228235	1.37991	0.431043	2.90764	0.629442	0.0307496	0.0419998	0.247947	0.247947
Y19D10A.5a	WBGene00021220	Y19D10A.5	0.00136799	0.0228235	1.37991	0.431043	2.90764	0.629442	0.0307496	0.0419998	0.247947	0.247947
C39B10.1	WBGene00008021	C39B10.1	2.54939e-05	0.00074095	1.37533	0.326652	3.5054	0.646311	0.0320943	0.0664682	0.127958	0.127958
F38A6.4	WBGene00009528	F38A6.4	0.00177871	0.0283858	1.37213	0.439098	3.00071	0.688647	0.0657545	0.0890233	0.223456	0.223456
F11D5.1a	WBGene00017380	F11D5.1	0.00610969	0.0736822	1.3677	0.498828	4.83686	0.726206	0.336177	-0.129901	0.0370673	0.0370673
T08B1.4b	WBGene00020341	T08B1.4	4.39885e-06	0.000154721	1.36711	0.297742	5.22567	0.667079	0.0279547	0.105021	0.0297715	0.105021
B0034.1	WBGene00015002	B0034.1	6.29971e-06	0.000215583	1.36668	0.302625	3.66621	0.625054	0.0299122	0.0509782	0.107461	0.107461
K11G9.5	WBGene00019655	K11G9.5	1.22181e-07	6.1515e-06	1.35777	0.256658	4.69625	0.63211	0.010558	0.0882517	0.040419	0.0882517
K11D12.5	WBGene00019645	swt-7	8.75141e-16	1.3548e-13	1.35666	0.168671	6.94292	0.586298	0.00112425	0.0415508	0.0112293	0.0415508
F25H8.5c	WBGene00001113	dur-1	0.00677293	0.0795313	1.35624	0.500862	4.27397	0.755564	0.319012	-0.0643263	0.0572823	0.0572823
C34G6.2	WBGene00016419	tyr-4	1.52936e-17	2.97467e-15	1.34792	0.158116	8.09692	0.575068	0.000407823	0.037093	0.00889037	0.037093
C05E4.9a.1	WBGene00001564	icl-1	1.0115e-65	1.91823e-62	1.34747	0.0786969	8.30153	0.547764	0.000367001	0.0034554	0.00892281	0.00892281
T24H10.7c	WBGene00012005	jun-1	6.29699e-05	0.00166435	1.34304	0.335644	4.21807	0.676319	0.0541864	0.114799	0.0605184	0.114799
F15G9.1b	WBGene00008865	F15G9.1	1.09432e-17	2.20384e-15	1.34143	0.156644	5.71554	0.569274	0.0145236	0.0222822	0.0218018	0.0222822
C37H5.9b	WBGene00003528	nas-9	5.91059e-18	1.24544e-15	1.33268	0.154348	6.17836	0.557195	0.0190502	0.0114265	0.0166848	0.0166848
CD4.2	WBGene00000795	crn-2	6.40479e-07	2.70415e-05	1.33105	0.267354	6.54014	0.617281	0.0018335	0.105384	0.0136572	0.105384
F22B7.9	WBGene00017698	F22B7.9	3.55519e-08	1.99274e-06	1.33001	0.24131	6.85777	0.600557	0.00138997	0.0859559	0.0116394	0.0859559
ZC443.4	WBGene00013899	ZC443.4	2.00657e-07	9.5331e-06	1.32745	0.255342	5.15139	0.606878	0.00718281	0.0906163	0.0310901	0.0906163
T27E4.7	WBGene00020865	T27E4.7	0.000136504	0.00327335	1.32553	0.347506	5.74557	0.672023	0.00290435	0.178236	0.0214089	0.178236
Y51H4A.5	WBGene00013101	Y51H4A.5	0.00652515	0.077623	1.32212	0.486045	2.78249	0.584478	0.0691564	0.00594177	0.285204	0.285204
Y71H2AM.16	WBGene00022181	pho-9	6.07177e-06	0.000208724	1.31024	0.289628	6.90279	0.615682	0.0010533	0.124774	0.0114152	0.124774
D1014.5	WBGene00017018	D1014.5	0.00271749	0.0396844	1.30928	0.436717	3.06368	0.67033	0.0777836	0.117297	0.208299	0.208299
C23H4.8	WBGene00044132	C23H4.8	0.000374455	0.0077609	1.29974	0.365356	3.35697	0.56318	0.0496621	0.0208176	0.150565	0.150565
ZC47.14	WBGene00013845	fbxa-37	1.50359e-05	0.000463021	1.29853	0.300018	4.25583	0.613865	0.017834	0.117182	0.0583082	0.117182
K04A8.5a	WBGene00019376	lipl-4	0.00890175	0.0978799	1.29593	0.495424	2.91528	0.613516	0.122331	0.0147745	0.245836	0.245836
F56F10.3.1	WBGene00018986	cdo-1	5.44876e-05	0.00146742	1.29476	0.320842	4.18909	0.623027	0.092124	0.0580115	0.0622855	0.0622855
K11G12.1a	WBGene00003530	nas-11	6.38855e-15	8.91928e-13	1.28832	0.165254	7.59582	0.530704	0.000726945	0.0402363	0.00932166	0.0402363
T14A8.2b	WBGene00020497	T14A8.2	4.07366e-08	2.24466e-06	1.28791	0.234694	4.20808	0.507017	0.0215014	-0.00975109	0.0611206	0.0611206
F54D10.2	WBGene00018803	fbxa-24	2.88352e-06	0.000107198	1.28748	0.275164	5.32788	0.58814	0.005936	0.107637	0.0279206	0.107637
F13H10.6a.1	WBGene00008777	F13H10.6	5.51223e-12	5.27066e-10	1.28402	0.186314	6.09947	0.536268	0.00356045	0.0485087	0.0174332	0.0485087
F35B12.8	WBGene00009387	glb-15	0.00102949	0.0180495	1.28393	0.391163	3.22153	0.60106	0.0547043	0.0784416	0.174809	0.174809
C34E7.1a.1	WBGene00004108	pqn-18	3.31384e-05	0.000940312	1.28385	0.309306	5.79836	0.609288	0.028823	0.114682	0.0207417	0.114682
F56D1.5	WBGene00000969	dhs-5	1.72899e-21	4.79836e-19	1.28315	0.134782	5.612	0.501196	0.00401301	0.00505682	0.0232363	0.0232363
B0218.8	WBGene00015052	clec-52	0.00120264	0.0205162	1.28011	0.395308	3.17522	0.544217	0.050396	0.0153715	0.184007	0.184007
F23D12.6	WBGene00009090	fipr-3	0.00076046	0.0140583	1.28	0.380184	3.26845	0.598836	0.050826	0.0833166	0.165984	0.165984
K10G9.1	WBGene00010755	vglu-2	9.94538e-06	0.000323324	1.27769	0.289177	6.77495	0.590095	0.00120001	0.124235	0.0120941	0.124235
F33D11.8	WBGene00018005	nlp-62	0.000167201	0.00388265	1.27754	0.339407	3.4491	0.5385	0.0367119	0.0243776	0.136084	0.136084
H01A20.1	WBGene00003602	nhr-3	0.00462781	0.0595337	1.27684	0.450884	6.35463	0.733052	0.0020917	0.302853	0.0151354	0.302853
F46B6.8	WBGene00009773	lipl-2	1.35428e-18	3.05142e-16	1.27356	0.144704	5.97027	0.511716	0.00297642	0.0284326	0.018758	0.0284326
F29G9.4b	WBGene00001345	fos-1	9.09997e-05	0.00229843	1.27305	0.325305	4.59394	0.613189	0.0466757	0.11206	0.0433715	0.11206
ZK370.4b	WBGene00022718	ZK370.4	8.90038e-06	0.000294398	1.27189	0.286313	5.87045	0.502146	0.103086	-0.0820413	0.0198763	0.0198763
F45E10.2a	WBGene00009729	F45E10.2	2.30964e-07	1.07706e-05	1.26849	0.245237	4.79799	0.513259	0.0522829	-0.0141093	0.0379286	0.0379286
ZK909.3	WBGene00014148	ZK909.3	1.74829e-12	1.77616e-10	1.26697	0.17963	6.19904	0.520285	0.00239878	0.0460017	0.0164955	0.0460017
F43C11.7	WBGene00018384	F43C11.7	2.71166e-21	7.34633e-19	1.26597	0.133636	5.62913	0.496736	0.0037979	0.0161138	0.02299	0.02299
W02D7.2	WBGene00020938	clec-218	4.39693e-14	5.46781e-12	1.26532	0.167621	5.7566	0.514025	0.00390454	0.0382407	0.0212671	0.0382407
R07E3.7	WBGene00011108	R07E3.7	8.44359e-05	0.0021675	1.26433	0.321593	4.73461	0.603663	0.01063	0.144503	0.0394351	0.144503
C06B3.3	WBGene00007362	cyp-35C1	6.53058e-09	4.18638e-07	1.26272	0.217613	6.65115	0.535162	0.0017219	0.0693113	0.0128703	0.0693113
ZK1025.3.2	WBGene00014183	ZK1025.3	0.00297536	0.0426484	1.25869	0.423762	3.061	0.647029	0.0604381	0.154238	0.208923	0.208923
F25E2.3	WBGene00017781	F25E2.3	1.20032e-05	0.000382572	1.25836	0.287458	4.29693	0.574198	0.0177259	0.106223	0.0560158	0.106223
C01F6.6i	WBGene00006438	nrfl-1	3.33893e-07	1.51362e-05	1.25469	0.245861	5.75979	0.544809	0.0328327	0.0578389	0.0212263	0.0578389
H32C10.2a	WBGene00003019	lin-33	1.70158e-07	8.28693e-06	1.25308	0.239626	6.0202	0.539966	0.00475936	0.0813719	0.0182305	0.0813719
C39B5.3	WBGene00016521	fbxa-62	0.000235844	0.00521584	1.25189	0.34045	3.45699	0.492224	0.0389462	-0.0113778	0.134913	0.134913
M7.8	WBGene00010884	M7.8	4.51692e-07	1.98057e-05	1.24905	0.247544	4.08255	0.505127	0.0225708	0.0237903	0.0693461	0.0693461
C17H12.10	WBGene00015935	C17H12.10	0.00019867	0.00449958	1.2374	0.332573	3.55402	0.592076	0.0357441	0.130163	0.121353	0.130163
F21E9.3	WBGene00017667	ttr-37	6.75116e-12	6.32248e-10	1.23693	0.180236	5.10991	0.497979	0.00759835	0.0411292	0.0318264	0.0411292
W09D12.1	WBGene00012364	zmp-4	6.26642e-15	8.80277e-13	1.23482	0.158341	7.27704	0.487519	0.000781793	0.0368261	0.0100455	0.0368261
T09E11.11	WBGene00011660	T09E11.11	8.12181e-12	7.57492e-10	1.23426	0.180542	4.98826	0.496132	0.00691498	0.0419784	0.0340381	0.0419784
Y69A2AR.5	WBGene00022076	daao-1	3.74153e-07	1.66953e-05	1.23373	0.242781	4.07754	0.502442	0.0187131	0.0385537	0.0697012	0.0697012
K03H1.3.2	WBGene00010538	ttr-3	0.000178527	0.00409964	1.22744	0.327527	4.64149	0.580713	0.0363333	0.124577	0.0419339	0.124577
C25B8.6	WBGene00003710	nhr-120	2.3319e-10	1.81736e-08	1.22476	0.193249	4.69903	0.494824	0.0107238	0.045294	0.0403456	0.045294
T03D8.6b	WBGene00011393	T03D8.6	3.52889e-07	1.59023e-05	1.22397	0.240334	4.94469	0.514854	0.0517736	0.0300097	0.0348674	0.0348674
F15E6.3	WBGene00017484	F15E6.3	3.59056e-07	1.61071e-05	1.22245	0.240191	6.59447	0.517545	0.00159912	0.0849388	0.0132619	0.0849388
M163.1	WBGene00010935	M163.1	0.000137419	0.00329183	1.22188	0.320471	6.92076	0.571142	0.00101308	0.15304	0.0113303	0.15304
F55A12.9a	WBGene00004131	pqn-44	8.11086e-06	0.000270644	1.22063	0.273546	5.79519	0.53677	0.0267386	0.0855022	0.020781	0.0855022
C33C12.8	WBGene00016340	gba-2	0.00130546	0.0219898	1.21947	0.379331	3.64989	0.6188	0.0415223	0.174316	0.109371	0.174316
H06I04.6a.1	WBGene00019170	H06I04.6	0.00801644	0.0901589	1.21663	0.458867	3.94572	0.507828	0.235983	-0.156268	0.0798551	0.0798551
T20D4.11	WBGene00020617	T20D4.11	2.7771e-10	2.14961e-08	1.2141	0.192387	4.56955	0.474985	0.0113608	0.0296043	0.0441582	0.0441582
C11G10.1	WBGene00007525	C11G10.1	0.00233497	0.0351434	1.21044	0.397656	5.04829	0.629309	0.0075836	0.229612	0.0329326	0.229612
T19B4.1	WBGene00020556	pamn-1	1.70421e-07	8.28693e-06	1.20681	0.230791	6.97457	0.500832	0.000944621	0.0789519	0.0110922	0.0789519
ZK337.1b.1	WBGene00013969	tep-1	0.00089888	0.0161451	1.20216	0.362053	6.36734	0.590855	0.103307	0.0933161	0.0150286	0.0933161
F38B2.1a	WBGene00002050	ifa-1	9.59009e-07	3.97526e-05	1.19657	0.244205	6.03752	0.5011	0.0710173	0.0184369	0.0180522	0.0184369
T28C6.1d	WBGene00012118	grsp-2	0.00286564	0.0414123	1.19399	0.400428	5.09799	0.620097	0.0339251	0.206589	0.0320389	0.206589
M176.6a	WBGene00002199	kin-15	1.34161e-07	6.69541e-06	1.19366	0.22637	5.13204	0.459877	0.0454319	-0.00489808	0.0314332	0.0314332
H28G03.5	WBGene00023313	H28G03.5	1.32028e-06	5.28043e-05	1.19328	0.246716	4.81046	0.500221	0.0199869	0.0713161	0.0376476	0.0713161
F28G4.1	WBGene00009226	cyp-37B1	2.79957e-09	1.89271e-07	1.19216	0.200602	4.50389	0.456121	0.0138956	0.023285	0.0464659	0.0464659
F55H12.4	WBGene00010135	F55H12.4	8.72298e-13	9.31967e-11	1.19027	0.166488	8.04717	0.458285	0.000423403	0.0411539	0.00890018	0.0411539
F28G4.5	WBGene00009230	oac-18	0.00687111	0.0802699	1.18919	0.439947	4.21546	0.656516	0.0192828	0.271048	0.0606751	0.271048
Y68A4A.13	WBGene00044212	Y68A4A.13	0.000235274	0.00521338	1.18246	0.321513	4.11113	0.543505	0.0177639	0.137292	0.0673614	0.137292
F41E7.5	WBGene00009621	fipr-21	1.37551e-12	1.42934e-10	1.17995	0.166507	7.4441	0.450955	0.000699595	0.0408873	0.00961945	0.0408873
T23G11.6c.1	WBGene00011971	lron-9	5.06575e-05	0.00137403	1.17963	0.291083	4.0298	0.513237	0.0539001	0.06582	0.0731938	0.0731938
Y77E11A.14c	WBGene00022314	Y77E11A.14	6.22335e-06	0.000213612	1.179	0.260917	4.12343	0.498703	0.0246256	0.0774912	0.066528	0.0774912
Y75B8A.27.1	WBGene00004172	pqn-92	7.62426e-11	6.29103e-09	1.1745	0.180474	6.94394	0.452919	0.00132269	0.0475338	0.0112248	0.0475338
F13H10.6b	WBGene00008777	F13H10.6	1.13729e-06	4.66328e-05	1.17347	0.241143	4.33186	0.482888	0.0253118	0.0619135	0.0541573	0.0619135
F40F4.8	WBGene00004124	pqn-37	8.76023e-08	4.55152e-06	1.17182	0.219001	4.93677	0.469499	0.00763522	0.0643071	0.0350214	0.0643071
T20D4.15	WBGene00020620	T20D4.15	0.00428887	0.0560363	1.16959	0.409505	3.11226	0.457812	0.0542093	0.00508032	0.197333	0.197333
Y61A9LA.1a	WBGene00022014	Y61A9LA.1	0.000172774	0.00399982	1.16927	0.311321	4.61112	0.506404	0.102543	0.0177678	0.0428378	0.0428378
F25E5.5	WBGene00017786	F25E5.5	1.84505e-12	1.86612e-10	1.16876	0.165883	5.72648	0.442823	0.00330016	0.0379755	0.0216575	0.0379755
C05D9.9b	WBGene00015476	C05D9.9	9.11607e-06	0.000301095	1.1683	0.2633	4.90092	0.49267	0.00996106	0.0940294	0.0357313	0.0940294
F36F2.1b.1	WBGene00009475	F36F2.1	0.000223964	0.00498704	1.1655	0.315826	4.07915	0.482731	0.0800326	0.0139834	0.0695866	0.0695866
C10H11.3	WBGene00015692	ugt-25	3.64278e-29	1.88406e-26	1.1619	0.103648	6.43753	0.417697	0.00166228	0.0142075	0.0144522	0.0144522
M199.4	WBGene00010953	clec-190	3.89707e-10	2.90773e-08	1.16005	0.185368	6.99507	0.444947	0.00100622	0.0505355	0.011008	0.0505355
W01A8.1b.2	WBGene00007024	plin-1	0.00768003	0.0873872	1.1564	0.433786	4.39624	0.626981	0.129748	0.152508	0.0509639	0.152508
ZK455.4	WBGene00000212	asm-2	5.32683e-10	3.92306e-08	1.15565	0.18612	5.03607	0.442227	0.00621257	0.0457485	0.0331548	0.0457485
F47B8.10	WBGene00009811	F47B8.10	0.00539188	0.0665418	1.15493	0.415049	3.18144	0.606878	0.0536995	0.204699	0.182743	0.204699
Y54G2A.36.1	WBGene00021898	Y54G2A.36	7.61313e-09	4.853e-07	1.15422	0.199802	5.24548	0.434454	0.0304637	0.0130219	0.0294175	0.0294175
Y73F8A.6	WBGene00000370	ccg-1	4.29226e-10	3.18172e-08	1.15377	0.18481	8.09354	0.44034	0.000328875	0.0509031	0.00889082	0.0509031
K01C8.1.2	WBGene00010456	K01C8.1	8.57867e-40	7.80899e-37	1.15296	0.087334	7.27197	0.402393	0.00138074	0.00311928	0.0100601	0.0100601
Y58A7A.2	WBGene00021976	Y58A7A.2	0.00659866	0.0781932	1.15001	0.423352	3.05959	0.451146	0.0595906	0.00839303	0.20925	0.20925
Y50D4B.4a	WBGene00021743	Y50D4B.4	2.13702e-37	1.62107e-34	1.14908	0.0899162	7.59124	0.405814	0.000966967	0.0111604	0.00932941	0.0111604
F41E6.6.1	WBGene00007055	tag-196	1.26615e-39	1.10822e-36	1.14669	0.0870527	7.9497	0.403561	0.000439964	0.0109273	0.00893951	0.0109273
F49F1.7a	WBGene00018647	F49F1.7	4.26532e-09	2.80537e-07	1.14497	0.194936	4.72554	0.41195	0.0173375	0.00599377	0.0396625	0.0396625
F36A4.8	WBGene00018085	ttr-20	5.43278e-08	2.94366e-06	1.14303	0.210249	5.29821	0.444999	0.00609047	0.0602167	0.0284649	0.0602167
BE10.2	WBGene00007210	agmo-1	0.00181463	0.0287516	1.14286	0.366418	3.47603	0.552953	0.0410868	0.160306	0.132132	0.160306
F45E10.2b	WBGene00009729	F45E10.2	0.00681249	0.0798722	1.1418	0.421972	4.66886	0.604785	0.109685	0.157405	0.0411594	0.157405
Y38E10A.26	WBGene00012604	nspe-2	0.00382764	0.0516684	1.14161	0.394744	3.19162	0.566392	0.0530408	0.166221	0.180694	0.180694
Y37A1A.2	WBGene00012535	Y37A1A.2	3.05809e-11	2.65622e-09	1.14032	0.171639	6.25955	0.425454	0.00192744	0.0422624	0.0159559	0.0422624
T28C12.4a.2	WBGene00020891	T28C12.4	0.000822436	0.015021	1.14017	0.340846	6.398	0.52941	0.0568072	0.117457	0.0147739	0.117457
F35F10.13	WBGene00018062	F35F10.13	8.33454e-06	0.000277294	1.13969	0.255742	3.95746	0.436745	0.0192221	0.0396227	0.078884	0.078884
Y32F6B.3	WBGene00012532	crp-1	4.33441e-05	0.00119128	1.13854	0.278447	5.43227	0.481921	0.00560306	0.110696	0.0260586	0.110696
F53F4.5a	WBGene00001479	fmo-4	6.33341e-09	4.07146e-07	1.13802	0.19595	6.54378	0.434603	0.00605125	0.0515434	0.0136301	0.0515434
C01F6.6b	WBGene00006438	nrfl-1	6.99405e-06	0.000236148	1.13757	0.253138	5.02704	0.465113	0.0189585	0.0771596	0.0333199	0.0771596
F08B12.4a	WBGene00008572	F08B12.4	4.38109e-07	1.92844e-05	1.13632	0.224942	7.00432	0.448084	0.0014658	0.0744325	0.0109711	0.0744325
F08B12.4b.1	WBGene00008572	F08B12.4	4.38109e-07	1.92844e-05	1.13632	0.224942	7.00432	0.448084	0.0014658	0.0744325	0.0109711	0.0744325
C42D4.1.1	WBGene00016594	C42D4.1	1.1341e-07	5.76086e-06	1.13291	0.213603	8.38405	0.439797	0.00206839	0.066371	0.00896924	0.066371
B0334.3a.1	WBGene00007143	B0334.3	1.90989e-08	1.12892e-06	1.13246	0.201506	7.43655	0.433466	0.0185055	0.0424018	0.00963645	0.0424018
K08F9.1a	WBGene00010684	K08F9.1	0.00831791	0.0925174	1.13196	0.428954	3.07361	0.415609	0.0699955	-0.0309857	0.206007	0.206007
T28A11.16	WBGene00020878	T28A11.16	1.45202e-05	0.000448963	1.13158	0.260983	3.95669	0.447971	0.0232209	0.0565627	0.0789476	0.0789476
C29F7.2a	WBGene00007811	C29F7.2	3.16219e-26	1.33263e-23	1.13114	0.106767	6.80032	0.39752	0.00106272	0.016036	0.0119491	0.016036
Y57G11C.31	WBGene00013321	Y57G11C.31	0.000188232	0.00427931	1.12908	0.302354	6.14803	0.49215	0.00231399	0.134813	0.0169675	0.134813
F58F9.7.1	WBGene00019060	acox-3	0.0042323	0.0555768	1.12741	0.394157	6.44308	0.440481	0.218632	-0.144675	0.0144077	0.0144077
F45E4.5a	WBGene00018470	F45E4.5	0.000208053	0.00467852	1.12703	0.30386	4.26964	0.491853	0.0325023	0.105994	0.0575253	0.105994
E04F6.15	WBGene00017131	E04F6.15	3.00513e-15	4.3559e-13	1.1242	0.142472	5.45006	0.389759	0.00468889	0.00857267	0.0257585	0.0257585
C07A12.2	WBGene00015560	C07A12.2	0.00038211	0.0078723	1.11864	0.314919	3.56641	0.407536	0.0290322	0.0111323	0.119729	0.119729
W02D9.5	WBGene00012211	ssp-37	8.53885e-08	4.45685e-06	1.11618	0.208423	5.16857	0.425886	0.00630857	0.0588518	0.0307856	0.0588518
T22B7.3	WBGene00020672	T22B7.3	2.1106e-15	3.13928e-13	1.11564	0.140603	5.45832	0.392979	0.00403303	0.0204489	0.0256207	0.0256207
C07A9.12	WBGene00043994	C07A9.12	0.000323579	0.00684994	1.1153	0.31018	3.61627	0.457611	0.0308962	0.0746565	0.113422	0.113422
F54F3.3	WBGene00010062	lipl-1	5.59396e-11	4.75007e-09	1.11299	0.169813	5.59802	0.406226	0.00385149	0.039403	0.02344	0.039403
ZK563.1	WBGene00006865	slcf-2	2.16214e-05	0.000638182	1.10785	0.260827	3.96258	0.417069	0.023581	0.0375053	0.0784651	0.0784651
M60.2.1	WBGene00019779	endu-2	6.2443e-06	0.000214008	1.10666	0.244947	6.31188	0.439406	0.0349296	0.0550691	0.0155001	0.0550691
M03A1.3	WBGene00019746	M03A1.3	2.33449e-07	1.08642e-05	1.10526	0.213763	4.31376	0.397792	0.0134311	0.0257057	0.0551107	0.0551107
F44C4.3	WBGene00000784	cpr-4	1.87829e-08	1.11313e-06	1.10457	0.196443	8.84418	0.412329	0.000168804	0.0577158	0.00959701	0.0577158
E04F6.8	WBGene00017127	E04F6.8	3.36972e-24	1.14455e-21	1.1043	0.108816	6.99365	0.380053	0.000923881	0.0168374	0.0110137	0.0168374
T10B9.8	WBGene00011677	cyp-13A1	0.00398705	0.0534669	1.10352	0.383276	3.23156	0.481875	0.0474697	0.0982139	0.172881	0.172881
F02C12.5	WBGene00008519	cyp-13B1	6.12864e-05	0.00162716	1.10187	0.274931	3.84173	0.38078	0.0243041	-0.00362108	0.0890763	0.0890763
M02A10.3a	WBGene00004829	sli-1	3.24943e-10	2.48145e-08	1.10131	0.17519	6.81806	0.400695	0.0060019	0.0400352	0.0118507	0.0400352
F48C5.1	WBGene00009842	igeg-2	0.00235117	0.0353027	1.10048	0.361778	4.45318	0.520376	0.0134572	0.182868	0.0484626	0.182868
Y39A1A.19a	WBGene00001478	fmo-3	0.00816806	0.0913418	1.09418	0.413673	4.81067	0.564522	0.0611821	0.195506	0.0376429	0.195506
ZK822.3b	WBGene00003736	nhx-9	5.06403e-11	4.33241e-09	1.09418	0.166566	5.52647	0.385862	0.0170936	0.0162715	0.024523	0.024523
F08F1.4a	WBGene00017258	F08F1.4	0.000125048	0.00302735	1.09295	0.284919	4.97996	0.455779	0.0113842	0.110384	0.034194	0.110384
ZK270.1	WBGene00004237	ptr-23	3.76782e-12	3.71188e-10	1.08732	0.156547	6.93242	0.384086	0.00101508	0.0357454	0.0112767	0.0357454
C49F8.1	WBGene00008213	C49F8.1	2.37412e-08	1.36779e-06	1.0863	0.194598	4.57726	0.383816	0.0128971	0.0243566	0.0439056	0.0439056
C25H3.10a	WBGene00016119	C25H3.10	0.000336708	0.00706218	1.08299	0.302065	4.10535	0.424823	0.0691077	0.0220953	0.0677574	0.0677574
C45B11.3.2	WBGene00000981	dhs-18	0.000260671	0.0056658	1.08194	0.296296	5.40335	0.439181	0.10513	0.00487693	0.026557	0.026557
B0286.2a	WBGene00002252	lat-2	3.47384e-08	1.95679e-06	1.07957	0.195727	4.68497	0.371113	0.016744	0.010092	0.0407198	0.0407198
M7.3	WBGene00000246	bcc-1	3.03363e-06	0.000111349	1.07914	0.231152	4.20001	0.397843	0.0185341	0.0420658	0.0616127	0.0616127
K04F10.4g.2	WBGene00000254	bli-4	7.42331e-17	1.29948e-14	1.07185	0.128518	6.2854	0.354714	0.0090459	0.00351978	0.0157295	0.0157295
F56B3.7	WBGene00018931	ugt-52	3.3873e-09	2.25394e-07	1.06531	0.180206	4.76722	0.348285	0.0100684	-0.000297418	0.038643	0.038643
F19H8.4	WBGene00008964	mltn-9	5.50816e-09	3.55097e-07	1.06451	0.18256	4.71677	0.350678	0.0101069	0.00329435	0.0398853	0.0398853
C31B8.8	WBGene00016283	zmp-3	9.16463e-05	0.00231219	1.06389	0.271975	5.87107	0.428322	0.00333495	0.107621	0.0198691	0.107621
F49E12.2	WBGene00009898	dod-23	1.75631e-20	4.54185e-18	1.06364	0.114663	9.29391	0.355174	9.5048e-05	0.0196263	0.0108975	0.0196263
T14G8.4	WBGene00011772	T14G8.4	0.00761678	0.0868413	1.06005	0.39723	3.21105	0.404412	0.0598409	0.0242851	0.176847	0.176847
Y54G2A.15	WBGene00021880	Y54G2A.15	0.000332714	0.00698484	1.05949	0.295254	3.74748	0.429382	0.0322866	0.0834974	0.0984755	0.0984755
F14H3.10	WBGene00008829	cyp-35D1	6.54355e-06	0.000223256	1.0573	0.234536	4.12359	0.345491	0.0159939	-0.00333273	0.0665172	0.0665172
K12G11.3	WBGene00010790	sodh-1	0.000630586	0.0120852	1.0552	0.308708	6.4579	0.448394	0.0017443	0.141207	0.0142896	0.141207
K08C7.5	WBGene00001477	fmo-2	0.00176098	0.0281423	1.04906	0.335395	3.63336	0.465145	0.0280844	0.14065	0.111342	0.14065
Y106G6D.6	WBGene00013702	Y106G6D.6	1.16772e-05	0.000373752	1.04632	0.238693	5.35816	0.396805	0.00551309	0.0799487	0.0273628	0.0799487
T10H9.8	WBGene00044779	T10H9.8	1.04952e-06	4.31547e-05	1.04465	0.213974	4.64956	0.382327	0.0103229	0.0583543	0.041702	0.0583543
T20H9.3	WBGene00020639	fbxa-71	1.99552e-05	0.000597527	1.03995	0.243811	4.07919	0.374146	0.0195819	0.0425407	0.0695837	0.0695837
R13H4.5	WBGene00011263	R13H4.5	0.00191601	0.0300178	1.03658	0.334062	5.09382	0.456265	0.00702529	0.160371	0.0321134	0.160371
M153.1	WBGene00010924	M153.1	1.01674e-08	6.28746e-07	1.03497	0.180689	6.03214	0.360529	0.00237969	0.0465932	0.0181074	0.0465932
ZK795.1	WBGene00014081	ipmk-1	2.99486e-05	0.000857284	1.03121	0.247063	5.64085	0.392264	0.00418697	0.0873734	0.0228237	0.0873734
F46A8.7	WBGene00009750	F46A8.7	0.00211637	0.0324762	1.03	0.335134	4.04793	0.453047	0.018951	0.149521	0.0718432	0.149521
F58G1.7	WBGene00010269	F58G1.7	4.08394e-05	0.00112926	1.02729	0.250396	5.0404	0.391837	0.0102758	0.0837713	0.0330759	0.0837713
C18H9.6	WBGene00016004	C18H9.6	6.56081e-13	7.1781e-11	1.02622	0.142763	6.60767	0.340396	0.00129694	0.0292749	0.0131688	0.0292749
B0213.2	WBGene00003765	nlp-27	4.62912e-39	3.90166e-36	1.02579	0.0784595	8.05155	0.32306	0.000293554	0.00894029	0.00889904	0.00894029
C09H5.2a	WBGene00015660	catp-3	1.14069e-06	4.66884e-05	1.02487	0.210633	7.59376	0.368349	0.00116176	0.0653879	0.00932514	0.0653879
T03F7.7b	WBGene00011404	T03F7.7	2.56656e-16	4.2633e-14	1.02147	0.124689	5.89119	0.32451	0.0036845	0.0106787	0.0196366	0.0196366
ZC239.22	WBGene00194717	ZC239.22	6.09846e-05	0.00162129	1.02034	0.254514	4.1055	0.39006	0.01427	0.082896	0.0677472	0.082896
K08H10.1n	WBGene00002263	lea-1	7.88487e-10	5.71452e-08	1.0201	0.165945	6.57662	0.344756	0.027917	0.0128001	0.0133897	0.0133897
T01H8.5d	WBGene00001651	gon-2	5.92991e-06	0.000204156	1.01654	0.224459	6.41643	0.325696	0.0609497	-0.0413414	0.0146229	0.0146229
F46C8.8	WBGene00018487	F46C8.8	0.0044223	0.0573111	1.01611	0.356988	3.62127	0.462676	0.0377961	0.153365	0.112809	0.153365
F23H12.8	WBGene00009096	fipr-1	4.13636e-13	4.61428e-11	1.01471	0.13994	5.53427	0.329441	0.00497339	0.020715	0.0244015	0.0244015
F25E5.4	WBGene00017785	F25E5.4	2.01361e-08	1.18407e-06	1.01386	0.180696	4.78371	0.312577	0.0107205	-0.00546346	0.0382563	0.0382563
AC7.2a.1	WBGene00004929	soc-2	0.0019745	0.0307554	1.01356	0.327586	5.00172	0.436968	0.108824	0.0521449	0.0337869	0.0521449
T23B3.2.1	WBGene00020710	T23B3.2	0.0012361	0.0209708	1.01207	0.313295	5.30019	0.425073	0.0239273	0.123304	0.0284288	0.123304
T27E4.3	WBGene00002019	hsp-16.48	0.00100647	0.0177277	1.0117	0.307628	4.55658	0.420624	0.00657141	0.135381	0.0445915	0.135381
T27E4.9	WBGene00002020	hsp-16.49	0.00100647	0.0177277	1.0117	0.307628	4.55658	0.420624	0.00657141	0.135381	0.0445915	0.135381
C14F11.5a	WBGene00002024	hsp-43	4.91029e-07	2.11635e-05	1.01111	0.201024	7.59419	0.355194	0.000621154	0.0599948	0.0093244	0.0599948
C15H9.1	WBGene00003778	nnt-1	7.48856e-09	4.787e-07	1.01072	0.174877	4.80744	0.317731	0.00815759	0.00592561	0.0377154	0.0377154
DY3.6	WBGene00008439	mfb-1	7.3811e-05	0.00192408	1.00913	0.254596	6.04096	0.383288	0.00267204	0.094557	0.0180171	0.094557
F32A11.6	WBGene00003388	moe-3	4.50234e-11	3.88105e-09	1.00557	0.15267	5.47506	0.331319	0.00489912	0.0300632	0.0253447	0.0300632
Y41D4A.7a	WBGene00021509	Y41D4A.7	0.00596633	0.0721704	1.0055	0.365685	3.86631	0.451193	0.113796	0.0710597	0.086792	0.086792
F53C11.9	WBGene00044921	F53C11.9	7.71034e-08	4.0711e-06	1.00497	0.187013	4.61469	0.309225	0.00973193	-0.00193633	0.0427291	0.0427291
T14B1.1.1	WBGene00011763	T14B1.1	0.00728601	0.0840276	1.00139	0.373167	4.83317	0.464819	0.171733	0.0332501	0.0371471	0.0371471
K08H10.1b.2	WBGene00002263	lea-1	1.12068e-07	5.70545e-06	0.998946	0.188268	6.41109	0.328796	0.0385007	-0.00171594	0.0146664	0.0146664
C39E9.8a	WBGene00008032	C39E9.8	9.34681e-05	0.0023546	0.99872	0.255627	5.63854	0.328659	0.0751611	-0.0383782	0.0228563	0.0228563
K07C6.5	WBGene00019473	cyp-35A5	0.000263525	0.00572236	0.997856	0.273479	4.76423	0.388464	0.0111962	0.10099	0.0387142	0.10099
C25E10.12	WBGene00016101	C25E10.12	4.43538e-06	0.000155526	0.997668	0.217363	5.70499	0.355299	0.00352913	0.0673411	0.0219422	0.0673411
C33G8.10	WBGene00016367	nhr-162	0.00430482	0.0562048	0.994788	0.348448	4.34756	0.44258	0.0156508	0.166473	0.0533478	0.166473
C28G1.1	WBGene00006718	ubc-23	3.14495e-06	0.000115064	0.991654	0.21275	4.35264	0.349066	0.0148051	0.0527615	0.0530888	0.0530888
C12D8.11.1	WBGene00004405	rop-1	0.000366541	0.0076177	0.988104	0.277318	8.61937	0.385191	0.000591833	0.114766	0.0092098	0.114766
F55A12.4c.1	WBGene00000966	dhs-2	0.000251331	0.00548899	0.988032	0.269888	5.32016	0.303624	0.0811963	-0.0677439	0.0280628	0.0280628
ZC15.7	WBGene00013835	mlt-4	0.000278538	0.00601966	0.986788	0.271507	3.8371	0.311968	0.0210605	0.0037439	0.0895136	0.0895136
Y48E1B.16	WBGene00013013	clec-145	0.0061481	0.0740668	0.985129	0.359565	3.38617	0.360878	0.0481206	0.0390474	0.14581	0.14581
ZC47.9	WBGene00013841	fbxa-33	0.000476159	0.00949324	0.98295	0.28134	3.79873	0.383389	0.0254931	0.0914217	0.0932348	0.0932348
JC8.14	WBGene00044737	ttr-45	1.18279e-06	4.79799e-05	0.980133	0.201736	7.5114	0.337035	0.000600611	0.0604454	0.00947699	0.0604454
F58A6.1.1	WBGene00019022	F58A6.1	0.00018878	0.0042875	0.978093	0.261972	5.00917	0.365017	0.0692952	0.028226	0.0336488	0.0336488
F28C10.3	WBGene00017898	F28C10.3	0.000414602	0.00843926	0.976844	0.276678	6.9547	0.378128	0.0011048	0.113722	0.0111773	0.113722
T23F1.5	WBGene00011948	T23F1.5	0.000279258	0.00602948	0.973871	0.268002	4.0199	0.370718	0.0225815	0.0851562	0.0739434	0.0851562
T05C12.10	WBGene00004264	qua-1	8.31332e-05	0.00214254	0.973513	0.247387	4.66522	0.357759	0.0108015	0.0809989	0.0412603	0.0809989
F40B5.1	WBGene00018225	nep-14	0.000133597	0.00320704	0.973016	0.254734	4.03401	0.348679	0.024457	0.0563561	0.0728773	0.0728773
F16C3.2	WBGene00008886	F16C3.2	4.68703e-06	0.000163844	0.972746	0.212468	4.78747	0.338042	0.00806451	0.0596492	0.0381695	0.0596492
Y69A2AR.4	WBGene00004878	smf-3	2.89324e-07	1.32478e-05	0.970591	0.189189	4.62751	0.325565	0.011045	0.0426438	0.0423442	0.0426438
ZK470.2c	WBGene00022745	ZK470.2	0.000145864	0.00345055	0.969858	0.25536	4.74547	0.360437	0.0392898	0.058523	0.0391672	0.058523
F38B7.2b	WBGene00009533	F38B7.2	0.00330035	0.0463331	0.968036	0.329456	5.21497	0.411378	0.0123564	0.150456	0.0299622	0.150456
F31F4.12	WBGene00017961	nhr-180	0.000469333	0.00938451	0.967555	0.276628	3.80729	0.311529	0.0223951	0.0159549	0.0923897	0.0923897
F46A8.1	WBGene00014759	F46A8.1	0.00121937	0.0207548	0.96716	0.299031	3.66135	0.32532	0.0261041	0.0297717	0.108025	0.108025
C46H11.4a	WBGene00002979	lfe-2	0.000106563	0.00262169	0.965002	0.249024	5.16143	0.353784	0.0290296	0.0639898	0.0309122	0.0639898
F53A9.7	WBGene00018730	F53A9.7	0.000141932	0.00337507	0.964244	0.25343	5.09675	0.356002	0.00712435	0.0892156	0.0320611	0.0892156
Y50D4B.4b	WBGene00021743	Y50D4B.4	5.20218e-09	3.37282e-07	0.963404	0.16495	5.54617	0.304198	0.016595	0.0155972	0.0242179	0.0242179
C37C3.8b.1	WBGene00016500	memo-1	0.00323554	0.0457432	0.963358	0.32718	4.59092	0.376686	0.117103	0.00573183	0.0434669	0.0434669
T01C3.4	WBGene00011321	fil-1	0.00218713	0.0332927	0.962128	0.314055	3.61096	0.307419	0.0338696	0.00326941	0.114076	0.114076
B0284.3	WBGene00007133	B0284.3	0.00131288	0.0220986	0.961714	0.299306	5.0036	0.384969	0.0074945	0.126881	0.033752	0.126881
T20B3.1	WBGene00011850	T20B3.1	2.70764e-11	2.37906e-09	0.957948	0.1438	5.4273	0.281115	0.0048745	0.00239562	0.0261433	0.0261433
Y54G2A.20	WBGene00021885	Y54G2A.20	0.00110253	0.0191314	0.954358	0.292482	3.7643	0.287561	0.0315983	-0.0136976	0.0967201	0.0967201
Y37D8A.6	WBGene00012548	Y37D8A.6	1.59683e-12	1.62955e-10	0.954224	0.135048	5.5879	0.294475	0.00376779	0.0228723	0.0235892	0.0235892
Y37E11AR.4	WBGene00021371	nape-1	0.00369683	0.0501363	0.953953	0.328617	4.57266	0.402594	0.0124515	0.149532	0.0440561	0.149532
ZC581.1	WBGene00022631	nekl-2	5.46175e-08	2.95233e-06	0.953377	0.175395	5.73456	0.309594	0.00406196	0.0420834	0.0215517	0.0420834
C30F12.3	WBGene00016262	C30F12.3	0.000154252	0.00362636	0.94995	0.251036	4.03771	0.285633	0.0219274	-0.00328822	0.072601	0.072601
C52A10.1	WBGene00016862	C52A10.1	0.00210231	0.032304	0.948606	0.308451	6.64011	0.384127	0.00130989	0.141403	0.0129449	0.141403
H04M03.4	WBGene00019154	glf-1	3.20801e-07	1.46302e-05	0.947641	0.185419	4.67316	0.295684	0.0105297	0.0223161	0.0410408	0.0410408
C44B7.4	WBGene00016626	clhm-1	0.00411528	0.054552	0.945738	0.329619	3.49453	0.316702	0.0334868	0.0269832	0.129486	0.129486
C40H1.2	WBGene00008038	C40H1.2	3.27324e-07	1.48978e-05	0.945632	0.185164	4.64741	0.279349	0.00966524	0.0041891	0.0417634	0.0417634
M03B6.3	WBGene00010835	M03B6.3	4.78559e-05	0.00130582	0.943474	0.232048	4.23001	0.331659	0.0143507	0.0664187	0.0598087	0.0664187
ZK6.8	WBGene00022643	ZK6.8	0.00595393	0.0721478	0.937469	0.34086	6.60144	0.403077	0.0015485	0.17273	0.0132126	0.17273
T14D7.2	WBGene00011768	oac-46	3.90295e-06	0.000140094	0.934549	0.202437	6.54788	0.311192	0.00179514	0.0596762	0.0135997	0.0596762
F48E3.8b	WBGene00018607	F48E3.8	3.12704e-10	2.41228e-08	0.931981	0.148114	5.42693	0.281051	0.00675688	0.0188363	0.0261495	0.0261495
T04F8.8a	WBGene00011446	T04F8.8	1.34588e-17	2.66332e-15	0.931883	0.109124	8.70168	0.274811	0.000340264	0.0175218	0.00933306	0.0175218
F36H2.1c	WBGene00009498	tat-5	0.00217587	0.0332324	0.931228	0.303815	5.18612	0.325674	0.107981	-0.0260829	0.0304746	0.0304746
C34D1.4a	WBGene00007931	C34D1.4	0.00424837	0.055687	0.927748	0.324489	4.2756	0.384567	0.0330683	0.124871	0.0571912	0.124871
C06G4.5	WBGene00015559	npr-17	5.77651e-07	2.46634e-05	0.927257	0.185505	4.74807	0.299236	0.00883992	0.0427785	0.0391036	0.0427785
Y105C5A.15d	WBGene00013639	Y105C5A.15	0.000412202	0.00840545	0.926613	0.262337	4.63023	0.340169	0.0513775	0.0518537	0.0422635	0.0518537
C56A3.2a	WBGene00008341	ttr-44	1.16777e-10	9.4237e-09	0.924553	0.143487	6.12644	0.281146	0.00102659	0.0298562	0.0171725	0.0298562
C56A3.2b	WBGene00008341	ttr-44	1.16777e-10	9.4237e-09	0.924553	0.143487	6.12644	0.281146	0.00102659	0.0298562	0.0171725	0.0298562
Y65B4BR.1	WBGene00022040	Y65B4BR.1	0.000638796	0.0122263	0.923696	0.270515	3.8956	0.27685	0.0256104	0.000496393	0.0841571	0.0841571
B0457.6	WBGene00007180	B0457.6	0.00145828	0.0241177	0.922669	0.289887	5.99554	0.356236	0.00269912	0.123352	0.0184885	0.123352
M199.5a	WBGene00000708	col-135	3.20096e-19	7.58794e-17	0.922258	0.102913	7.56317	0.267877	0.000526278	0.0153602	0.00937867	0.0153602
R07G3.2	WBGene00019939	lips-17	4.29254e-08	2.3482e-06	0.918009	0.16757	5.01196	0.284041	0.00852218	0.0305011	0.0335972	0.0335972
K07E1.1.2	WBGene00019489	K07E1.1	5.87774e-07	2.50486e-05	0.916158	0.183408	6.53014	0.29217	0.00201968	0.048438	0.013732	0.048438
C10H11.4	WBGene00015693	ugt-28	7.20941e-06	0.000241983	0.914377	0.203765	6.3847	0.30065	0.00162028	0.0606599	0.0148838	0.0606599
F29B9.8.1	WBGene00017923	F29B9.8	3.49781e-05	0.000982712	0.913651	0.220776	5.25903	0.308918	0.0221338	0.0509789	0.0291742	0.0509789
C01G6.7	WBGene00007228	acs-7	9.34862e-06	0.00030611	0.912014	0.205793	6.23396	0.300352	0.00232741	0.0611985	0.0161822	0.0611985
F47G3.4	WBGene00194641	F47G3.4	2.06317e-07	9.76123e-06	0.909808	0.17518	4.81706	0.267849	0.00853136	0.015873	0.0375008	0.0375008
Y48G9A.9a	WBGene00021702	Y48G9A.9	0.00068231	0.0128751	0.908756	0.267549	6.02756	0.333651	0.00505449	0.10232	0.0181545	0.10232
C53A5.13a	WBGene00008270	C53A5.13	0.00637041	0.0760207	0.908555	0.333038	5.08357	0.380739	0.063875	0.102497	0.0322968	0.102497
B0403.5	WBGene00015169	B0403.5	0.000777377	0.0143245	0.905776	0.269518	3.88886	0.320536	0.0242044	0.0688044	0.0847554	0.0847554
F26F12.3c	WBGene00017834	F26F12.3	8.65544e-05	0.00220821	0.903455	0.230151	6.23436	0.293993	0.0632756	-0.00187076	0.0161786	0.0161786
Y59E9AL.4	WBGene00021994	Y59E9AL.4	1.83704e-06	7.14623e-05	0.903429	0.189375	5.04542	0.287891	0.00734581	0.0464488	0.0329846	0.0464488
C50B6.8a	WBGene00008221	nhr-168	0.000294562	0.00630522	0.900545	0.248767	4.28812	0.303249	0.0363297	0.0386128	0.0564978	0.0564978
C53B7.7	WBGene00016896	nep-4	0.000204621	0.00461045	0.900354	0.242471	4.1022	0.257608	0.0202142	-0.00219338	0.0679741	0.0679741
ZK470.2a	WBGene00022745	ZK470.2	3.58189e-10	2.69911e-08	0.899881	0.143493	6.25395	0.267644	0.0122684	0.0186171	0.0160053	0.0186171
F57C12.4	WBGene00003408	mrp-2	2.32427e-05	0.000682496	0.898835	0.212429	6.28255	0.296523	0.0020038	0.0656856	0.0157544	0.0656856
C35C5.9.2	WBGene00007958	C35C5.9	0.000371153	0.00769949	0.898034	0.252272	4.24064	0.318309	0.0155871	0.0798744	0.059185	0.0798744
R13.4a	WBGene00011259	miz-1	0.00605098	0.0730128	0.896948	0.326756	6.28268	0.369478	0.0365293	0.123625	0.0157532	0.123625
T26C5.2	WBGene00012032	T26C5.2	0.00033931	0.00710365	0.895622	0.249945	3.98964	0.313383	0.0174171	0.0735094	0.0762915	0.0762915
F23H12.9a	WBGene00009097	fipr-2	1.09011e-10	8.85986e-09	0.895001	0.138676	5.81557	0.26163	0.00831615	0.0183364	0.0205304	0.0205304
M03F4.6	WBGene00019759	M03F4.6	0.000180759	0.00413837	0.892586	0.238373	4.14418	0.307199	0.0171306	0.068102	0.0651504	0.068102
T08A9.12	WBGene00004987	spp-2	1.00866e-12	1.06764e-10	0.89253	0.125191	6.62785	0.257791	0.00118889	0.0223205	0.0130287	0.0223205
H06I04.6b.2	WBGene00019170	H06I04.6	7.07477e-07	2.95957e-05	0.892472	0.179959	5.45785	0.26585	0.0229495	0.0106728	0.0256285	0.0256285
F19C7.2	WBGene00017592	F19C7.2	0.000476393	0.00949324	0.892252	0.25539	5.63007	0.317103	0.00367343	0.0941624	0.0229767	0.0941624
F15E6.4	WBGene00017485	F15E6.4	5.91914e-07	2.51779e-05	0.89083	0.178386	5.37551	0.276259	0.00514984	0.0425825	0.0270493	0.0425825
Y51A2D.13a	WBGene00013080	Y51A2D.13	0.000721875	0.0134764	0.888494	0.26278	6.85062	0.319691	0.00142919	0.102151	0.0116766	0.102151
E03H4.8	WBGene00008476	E03H4.8	0.000337593	0.00707421	0.887179	0.247497	5.70406	0.309632	0.00316937	0.088713	0.0219546	0.088713
T07C4.5	WBGene00011561	ttr-15	1.59701e-26	6.85719e-24	0.886045	0.0831329	9.10323	0.242767	0.000113477	0.00894158	0.0102531	0.0102531
Y106G6D.8.1	WBGene00013704	Y106G6D.8	0.00186317	0.029363	0.882376	0.283611	4.29363	0.279064	0.0644572	-0.00759762	0.0561958	0.0561958
Y105E8A.12a	WBGene00013672	catp-1	1.4758e-09	1.03657e-07	0.879284	0.145409	5.72534	0.243225	0.0100431	0.00406018	0.0216724	0.0216724
F38A3.2	WBGene00004300	ram-2	0.00263164	0.0387627	0.877709	0.291813	5.43472	0.333298	0.00512856	0.122604	0.0260168	0.122604
R07G3.8	WBGene00019944	R07G3.8	0.00109238	0.0189766	0.875435	0.268079	5.11173	0.316155	0.00636436	0.101435	0.0317942	0.101435
C16D9.1	WBGene00015857	C16D9.1	0.00620469	0.0744021	0.872707	0.318883	3.55789	0.300315	0.0316863	0.0581009	0.120843	0.120843
Y53H1B.2	WBGene00013181	Y53H1B.2	2.29294e-14	2.9151e-12	0.869314	0.113888	7.73895	0.242277	0.000401892	0.019054	0.00911728	0.019054
Y54G2A.36.4	WBGene00021898	Y54G2A.36	0.000384121	0.00789652	0.869288	0.244817	4.7756	0.296312	0.051458	0.0355593	0.0384453	0.0384453
C09F5.2b	WBGene00015648	orai-1	1.05678e-05	0.000341123	0.867161	0.196849	5.6078	0.27209	0.00901302	0.0491111	0.0232973	0.0491111
C13C12.1a	WBGene00000285	cal-1	3.01464e-06	0.000110831	0.863138	0.184833	4.9073	0.248023	0.0156418	0.0150087	0.0356032	0.0356032
Y41C4A.19	WBGene00000671	col-96	0.005929	0.0719223	0.863008	0.313629	6.16059	0.341471	0.00232356	0.145221	0.0168496	0.145221
F38E11.7a	WBGene00006949	wrt-3	0.00849315	0.0941904	0.862615	0.327765	3.39813	0.256699	0.0172376	0.0245972	0.143907	0.143907
F38E11.7b	WBGene00006949	wrt-3	0.00849315	0.0941904	0.862615	0.327765	3.39813	0.256699	0.0172376	0.0245972	0.143907	0.143907
T22E5.6	WBGene00020692	T22E5.6	0.00102196	0.0179451	0.862429	0.262583	3.91191	0.305654	0.0206957	0.0824526	0.0827288	0.0827288
M02H5.1	WBGene00003689	nhr-99	0.00493541	0.0622935	0.862394	0.306769	4.01149	0.336046	0.0197759	0.121385	0.0745875	0.121385
Y53F4B.1	WBGene00013149	Y53F4B.1	0.000131147	0.00315821	0.861212	0.225195	4.24827	0.244913	0.0173266	0.0106828	0.0587426	0.0587426
T03D8.6a	WBGene00011393	T03D8.6	4.59201e-12	4.44683e-10	0.861165	0.124488	6.0977	0.241079	0.00524702	0.0179989	0.0174505	0.0179989
T07C4.4.1	WBGene00004986	spp-1	2.79761e-18	6.12166e-16	0.858182	0.0984225	6.60713	0.224039	0.00135788	0.00251196	0.0131726	0.0131726
C49G9.2	WBGene00045474	C49G9.2	0.00422137	0.0554783	0.856899	0.299497	3.66343	0.290116	0.0267643	0.0605277	0.107783	0.107783
T14F9.4a	WBGene00003968	peb-1	0.00644462	0.0767847	0.855292	0.313954	5.11767	0.337738	0.00983795	0.138013	0.0316884	0.138013
B0222.5	WBGene00015056	B0222.5	8.51255e-07	3.5415e-05	0.854989	0.173664	6.49399	0.255493	0.00146068	0.0437781	0.0140072	0.0437781
F18G5.6	WBGene00017582	F18G5.6	2.81388e-11	2.46219e-09	0.852828	0.128129	6.27018	0.237895	0.00242302	0.0222026	0.0158626	0.0222026
C30F12.5a	WBGene00016264	C30F12.5	5.12096e-07	2.19882e-05	0.85187	0.169637	6.28104	0.252237	0.00234995	0.0408151	0.0157675	0.0408151
F17H10.2a	WBGene00008926	F17H10.2	0.00156305	0.025535	0.851096	0.269103	4.95073	0.304209	0.0396788	0.0689457	0.0347509	0.0689457
F22B5.3	WBGene00009041	cut-3	0.00542421	0.066832	0.846593	0.304453	5.44599	0.326246	0.00464973	0.134388	0.0258266	0.134388
B0454.6	WBGene00015197	B0454.6	2.07714e-05	0.000616291	0.846463	0.198867	5.66845	0.262408	0.00384406	0.055478	0.0224385	0.055478
R13A5.10	WBGene00020052	R13A5.10	0.00796725	0.0897698	0.846238	0.318919	3.54602	0.270356	0.0301495	0.0392513	0.122415	0.122415
F23F1.6	WBGene00017747	F23F1.6	0.00053844	0.0105269	0.846146	0.24449	4.05879	0.253618	0.0186139	0.0299225	0.0710489	0.0710489
C04F12.8	WBGene00007302	C04F12.8	0.00811993	0.0910051	0.845867	0.319552	5.53849	0.337184	0.00343924	0.149731	0.0243362	0.149731
C45B2.1	WBGene00016658	C45B2.1	4.05707e-11	3.51052e-09	0.843901	0.127825	7.7149	0.233258	0.000523362	0.0239857	0.00914644	0.0239857
Y41D4B.17	WBGene00021519	Y41D4B.17	0.00480246	0.0610898	0.841736	0.298489	4.59507	0.319471	0.0107281	0.122915	0.043336	0.122915
ZC443.3	WBGene00013898	ZC443.3	1.26462e-06	5.08464e-05	0.840105	0.173388	5.75018	0.247809	0.00323166	0.0418634	0.0213495	0.0418634
C04F12.3	WBGene00002069	ikb-1	8.44713e-06	0.000280221	0.839533	0.18851	5.30198	0.254087	0.00487536	0.0484284	0.0283961	0.0484284
Y45F10D.6	WBGene00012886	Y45F10D.6	2.26551e-05	0.0006661	0.836629	0.197459	4.49746	0.255703	0.011777	0.0453712	0.046708	0.046708
K08D10.14.1	WBGene00219216	K08D10.14	1.75718e-05	0.000538198	0.835963	0.194695	4.92502	0.210136	0.0216077	-0.0210011	0.0352516	0.0352516
JC8.8	WBGene00010440	ttr-51	5.00322e-16	8.07506e-14	0.834796	0.102916	8.44161	0.221776	0.000202268	0.0156853	0.00901313	0.0156853
EEED8.7b	WBGene00004701	rsp-4	0.000522166	0.0102616	0.834589	0.240577	4.47947	0.25293	0.0394136	0.0155473	0.047402	0.047402
ZK550.6	WBGene00014000	ZK550.6	1.23632e-07	6.19714e-06	0.834488	0.157807	6.71818	0.238794	0.00157301	0.0357813	0.0124361	0.0357813
F28D1.9	WBGene00009218	acs-20	3.15908e-05	0.000898639	0.831592	0.199821	6.11558	0.255378	0.00239407	0.0574985	0.0172769	0.0574985
Y5F2A.2.1	WBGene00012383	ttr-17	4.83652e-14	5.91746e-12	0.830338	0.110179	6.68553	0.221295	0.00556553	0.0125052	0.0126436	0.0126436
Y39A3CL.5a	WBGene00000545	clp-4	0.00265248	0.0390191	0.829487	0.276001	6.80967	0.297826	0.00109768	0.113167	0.0118969	0.113167
M04F3.4b.2	WBGene00019770	M04F3.4	0.00401968	0.0538093	0.829092	0.288218	6.1366	0.305902	0.00760109	0.117004	0.0170756	0.117004
Y119D3B.7	WBGene00022485	fbxa-63	0.00596489	0.0721704	0.828743	0.301393	3.64603	0.271921	0.0264295	0.0559163	0.109827	0.109827
C17H12.11.1	WBGene00015936	C17H12.11	3.45996e-08	1.95381e-06	0.828152	0.150125	5.36481	0.217882	0.00656427	0.00859992	0.0272421	0.0272421
F53H4.3	WBGene00010008	F53H4.3	0.00237059	0.0354918	0.825867	0.271721	3.8576	0.263172	0.0231552	0.0500385	0.0875936	0.0875936
Y17G7B.15b	WBGene00000565	cnt-1	0.00071468	0.013386	0.822111	0.242949	5.22354	0.273589	0.0210948	0.0674413	0.0298095	0.0674413
T24E12.5	WBGene00020774	T24E12.5	0.00173787	0.0278513	0.8212	0.26222	5.13814	0.284822	0.00689723	0.0962421	0.031325	0.0962421
ZC155.1.1	WBGene00003588	nex-1	3.07745e-05	0.000878716	0.818479	0.196388	8.65181	0.247254	0.000171926	0.0576806	0.00925588	0.0576806
T05D4.4a	WBGene00003887	osm-7	7.48604e-07	3.12014e-05	0.817062	0.165119	5.4361	0.224358	0.0149031	0.0151983	0.0259935	0.0259935
ZC455.5a	WBGene00013905	ugt-4	1.59495e-07	7.83937e-06	0.814107	0.155327	5.55119	0.210004	0.0120487	0.00191761	0.0241411	0.0241411
W05H9.1a	WBGene00021048	W05H9.1	0.000131961	0.00317111	0.813044	0.212685	7.72195	0.252594	0.000753486	0.0670986	0.00913768	0.0670986
F41E7.8	WBGene00009624	cnc-8	1.13335e-16	1.92475e-14	0.808017	0.0974699	6.63683	0.198095	0.00128334	0.00150066	0.0129672	0.0129672
F20D6.8	WBGene00017637	F20D6.8	0.00521363	0.0647093	0.806479	0.288695	3.78426	0.262344	0.0303358	0.0536914	0.0946818	0.0946818
K08B4.7	WBGene00023486	K08B4.7	9.40712e-05	0.00236289	0.806233	0.206441	4.36485	0.228089	0.0114518	0.0299047	0.0524749	0.0524749
Y51H7BM.1	WBGene00021772	math-45	0.00014086	0.00335659	0.806008	0.211737	4.3539	0.210697	0.0142233	0.00552972	0.0530254	0.0530254
Y38C9A.2a.1	WBGene00000480	cgp-1	0.0040802	0.0543001	0.805341	0.280422	7.19084	0.288936	0.00575111	0.112203	0.0103066	0.112203
C13A10.2	WBGene00015729	C13A10.2	0.00874046	0.096463	0.802919	0.306219	3.6173	0.262755	0.0273603	0.0593283	0.113295	0.113295
F37H8.3a	WBGene00009512	bigr-1	0.00186086	0.029363	0.802648	0.257955	4.67368	0.273122	0.022346	0.077465	0.0410265	0.077465
F17C11.11a	WBGene00008922	F17C11.11	0.000380804	0.00786385	0.802305	0.225808	7.42658	0.254295	0.000728771	0.075755	0.00965926	0.075755
F46C5.10	WBGene00009785	F46C5.10	2.82652e-05	0.000813186	0.801925	0.191527	5.66565	0.236944	0.0043452	0.0506786	0.0224771	0.0506786
ZK1290.14	WBGene00044396	ZK1290.14	0.00135588	0.0227048	0.800644	0.249898	4.76176	0.267248	0.0107087	0.0829649	0.0387729	0.0829649
R74.2	WBGene00011278	R74.2	0.000459758	0.00921825	0.798291	0.227877	4.20393	0.211404	0.0165191	0.00876086	0.0613727	0.0613727
T12A7.1.1	WBGene00001577	gem-4	0.00679286	0.0797241	0.796838	0.29438	6.34904	0.294477	0.00179054	0.128199	0.0151827	0.128199
C30G7.1	WBGene00001852	hil-1	0.000328684	0.00691939	0.79512	0.221385	4.25541	0.24293	0.0151845	0.0513975	0.0583322	0.0583322
F42A10.7	WBGene00018343	F42A10.7	1.30843e-09	9.27601e-08	0.794567	0.130979	5.68597	0.207036	0.00353475	0.0185089	0.0221986	0.0221986
T28H10.2	WBGene00012143	T28H10.2	1.31104e-05	0.000411522	0.792697	0.181884	4.71581	0.202937	0.00971282	0.00831957	0.03991	0.03991
Y73B6BL.44	WBGene00044350	Y73B6BL.44	7.04235e-07	2.95143e-05	0.792293	0.15973	5.12277	0.205046	0.00667285	0.0142367	0.0315978	0.0315978
F55H2.1a	WBGene00004933	sod-4	0.00170789	0.0274287	0.791815	0.252426	5.46954	0.264554	0.00506735	0.0905109	0.0254354	0.0905109
F08F1.8	WBGene00006649	tth-1	0.00358472	0.0491391	0.791563	0.271775	7.29632	0.276606	0.000726925	0.110066	0.00999101	0.110066
F48F7.5	WBGene00009850	F48F7.5	0.000827748	0.0150818	0.790993	0.236587	4.13251	0.216481	0.0180394	0.0179352	0.0659209	0.0659209
C41G11.1a	WBGene00016568	C41G11.1	3.26174e-06	0.000118954	0.790339	0.169834	5.87731	0.211371	0.0234686	0.00650709	0.0197966	0.0197966
R05G9R.1.1	WBGene00019906	R05G9R.1	0.00795084	0.0896617	0.789383	0.297415	3.65797	0.200314	0.0242633	-0.00754274	0.10842	0.10842
Y73E7A.8	WBGene00022274	Y73E7A.8	0.00272038	0.0396844	0.78934	0.263317	3.90551	0.21632	0.0207181	0.0160356	0.0832853	0.0832853
M60.2.2	WBGene00019779	endu-2	1.88243e-06	7.28865e-05	0.787591	0.165264	7.02756	0.218864	0.00769235	0.0332759	0.0108808	0.0332759
F52E4.6	WBGene00006948	wrt-2	1.9636e-05	0.000590299	0.786771	0.184299	4.66209	0.208635	0.0096017	0.0190646	0.0413475	0.0413475
F47E1.4	WBGene00018568	F47E1.4	2.73648e-05	0.000790279	0.786435	0.187498	4.59032	0.195573	0.00924749	0.0032894	0.0434859	0.0434859
F46F3.2	WBGene00009790	lgc-44	0.000111479	0.00273966	0.784124	0.202923	4.42753	0.196389	0.0122135	0.00270444	0.049553	0.049553
C48E7.6	WBGene00016751	C48E7.6	0.0011802	0.0201938	0.782044	0.241102	5.66432	0.253234	0.00386212	0.0833331	0.0224954	0.0833331
C07E3.9	WBGene00007419	C07E3.9	1.34801e-11	1.21733e-09	0.781023	0.115478	6.0809	0.190269	0.00238699	0.00670041	0.0176158	0.0176158
F37C4.5a.1	WBGene00018145	F37C4.5	1.37522e-06	5.48088e-05	0.781013	0.161748	8.45671	0.214389	0.00185252	0.0373913	0.00902623	0.0373913
F57C12.2	WBGene00019014	F57C12.2	0.00113618	0.0196326	0.776291	0.238533	4.14105	0.249066	0.0166611	0.0686862	0.0653562	0.0686862
F56F4.5	WBGene00003878	pept-3	7.82382e-08	4.12145e-06	0.774603	0.144216	5.40822	0.187802	0.0047251	0.00502378	0.0264721	0.0264721
C02C2.1	WBGene00015332	tyr-1	1.17975e-08	7.21709e-07	0.77449	0.135813	6.46811	0.202085	0.00198367	0.025684	0.014209	0.025684
C28D4.1.1	WBGene00003690	nhr-100	0.00809715	0.0908444	0.77443	0.292459	4.47181	0.224222	0.0805936	-0.0252191	0.0477052	0.0477052
Y17G7B.10b.1	WBGene00012463	Y17G7B.10	0.00437402	0.0568797	0.773568	0.271442	5.75007	0.192838	0.0891701	-0.0725251	0.0213509	0.0213509
F30B5.7	WBGene00017936	zipt-2.2	0.00038196	0.0078723	0.772476	0.217462	4.83807	0.235763	0.0103482	0.060586	0.0370411	0.060586
K03H1.4.1	WBGene00010539	ttr-2	2.25463e-15	3.31023e-13	0.771401	0.0973196	8.20295	0.189883	0.00204891	0.0121577	0.00889254	0.0121577
Y57E12AL.3	WBGene00023382	Y57E12AL.3	1.78951e-08	1.06887e-06	0.771266	0.136963	5.66239	0.19764	0.00561597	0.0183654	0.0225222	0.0225222
ZK822.2	WBGene00014090	ZK822.2	3.15512e-17	5.88534e-15	0.770547	0.0912898	6.88995	0.186941	0.00102326	0.00999961	0.0114775	0.0114775
F47C10.2	WBGene00018540	btb-21	0.000728708	0.0135928	0.770351	0.228013	4.22596	0.22694	0.0179364	0.043198	0.0600482	0.0600482
E02H1.7	WBGene00003618	nhr-19	2.99622e-06	0.00011051	0.769883	0.164819	5.01667	0.206526	0.00723767	0.0286495	0.0335104	0.0335104
F01D5.9.1	WBGene00008499	cyp-37A1	2.26591e-06	8.62817e-05	0.766768	0.162171	5.86569	0.183978	0.0195174	-0.0100192	0.0199319	0.0199319
T18D3.3a	WBGene00011821	cdf-2	4.15124e-05	0.00114648	0.766385	0.186974	4.67322	0.206747	0.0113995	0.0267795	0.0410392	0.0410392
F09F7.6	WBGene00017303	F09F7.6	3.99762e-06	0.000143266	0.766268	0.166164	5.47806	0.209283	0.00440485	0.037011	0.0252959	0.037011
Y48G1BR.1	WBGene00021675	Y48G1BR.1	1.42445e-12	1.47346e-10	0.764563	0.107964	6.29098	0.180168	0.00180337	0.0041977	0.0156809	0.0156809
F28E10.2b	WBGene00017901	igeg-1	0.00458821	0.0590577	0.76368	0.269413	4.63308	0.262062	0.0105356	0.0983394	0.0421797	0.0983394
F13H8.1b	WBGene00017434	F13H8.1	0.00202313	0.0313324	0.761623	0.246734	4.07359	0.19827	0.0213347	0.00897645	0.069982	0.069982
C35A5.11a	WBGene00044024	C35A5.11	0.00267253	0.0391621	0.761463	0.25356	3.98108	0.228291	0.0194675	0.0484613	0.0769713	0.0769713
C05A2.1	WBGene00004083	pph-1	0.000615592	0.0118373	0.760602	0.222096	5.8566	0.232747	0.00316108	0.0708291	0.0200386	0.0708291
F53B1.4	WBGene00018737	F53B1.4	0.000830381	0.0151176	0.760241	0.227449	4.6411	0.23547	0.00905513	0.0685447	0.0419454	0.0685447
K03E5.2d	WBGene00019361	K03E5.2	8.67391e-05	0.00221044	0.75982	0.193586	5.71042	0.218169	0.0135363	0.042677	0.0218697	0.042677
E04A4.4a	WBGene00001983	hoe-1	9.3473e-09	5.81193e-07	0.759647	0.132293	7.47224	0.181289	0.0166942	-0.00648136	0.00955785	0.00955785
C30G4.4s.5	WBGene00016269	C30G4.4	0.00769174	0.0874331	0.758517	0.284589	4.61346	0.269793	0.0198346	0.101651	0.0427667	0.101651
K09F6.13	WBGene00235164	K09F6.13	0.00118514	0.020248	0.757093	0.233496	4.16668	0.190084	0.0180849	0.0045735	0.0636954	0.0636954
F13B10.1b	WBGene00006575	tir-1	0.00114459	0.0197328	0.756979	0.232749	6.18668	0.236911	0.0367459	0.0445122	0.0166083	0.0445122
F57B9.9	WBGene00004133	abu-13	0.00374703	0.0507265	0.756155	0.260859	4.30729	0.253189	0.014508	0.0875635	0.0554565	0.0875635
Y73C8B.1	WBGene00022258	Y73C8B.1	0.000103758	0.00256653	0.754411	0.194354	4.52666	0.196694	0.0110279	0.0214128	0.0456325	0.0456325
F55A12.9c	WBGene00004131	pqn-44	0.00346515	0.0479953	0.754154	0.257994	7.46277	0.250497	0.00127353	0.0985678	0.00957826	0.0985678
Y38F1A.8	WBGene00012610	Y38F1A.8	0.000253629	0.00552946	0.753745	0.206022	4.38627	0.177841	0.0122347	-0.00298266	0.0514327	0.0514327
M01H9.4e	WBGene00019720	M01H9.4	0.00859792	0.0951668	0.752444	0.286357	4.16352	0.22417	0.0591031	0.00879446	0.0638977	0.0638977
K03E6.3	WBGene00003565	ncs-3	0.000854078	0.0154871	0.752115	0.225546	4.20417	0.222568	0.0149477	0.0511332	0.0613586	0.0613586
C01B4.7a	WBGene00015271	C01B4.7	0.0034986	0.0481364	0.751229	0.257257	4.0025	0.182653	0.0239886	-0.00730161	0.0752829	0.0752829
Y19D10A.4a	WBGene00021219	Y19D10A.4	0.0034986	0.0481364	0.751229	0.257257	4.0025	0.182653	0.0239886	-0.00730161	0.0752829	0.0752829
C18E9.1	WBGene00000286	cal-2	0.000767495	0.0141654	0.751141	0.223271	4.77924	0.229084	0.00820508	0.0665698	0.0383603	0.0665698
W08D2.4a	WBGene00001395	fat-3	6.99503e-15	9.70646e-13	0.748464	0.0961471	7.15347	0.169647	0.00343768	-0.0014534	0.0104287	0.0104287
F10G8.8a	WBGene00008666	F10G8.8	0.00491381	0.0621242	0.747926	0.265917	5.55373	0.252672	0.0431039	0.0629639	0.0241023	0.0629639
K02D10.4	WBGene00019304	K02D10.4	0.00365947	0.0497185	0.74715	0.257096	5.12948	0.246788	0.00662025	0.0925271	0.0314787	0.0925271
F45E1.4	WBGene00018465	F45E1.4	3.34286e-08	1.90183e-06	0.740114	0.134019	5.60811	0.178521	0.00364886	0.0140892	0.0232927	0.0232927
C04F12.1	WBGene00007297	C04F12.1	1.70662e-20	4.46407e-18	0.73947	0.0796907	7.75722	0.167858	0.000429382	0.00433681	0.00909652	0.00909652
T28F4.5.2	WBGene00012140	T28F4.5	1.12758e-05	0.000362435	0.737616	0.167978	8.08595	0.197083	0.000334106	0.0419909	0.00889194	0.0419909
T17H7.7	WBGene00020551	T17H7.7	0.00740706	0.0850466	0.734638	0.274327	4.66099	0.252214	0.00905149	0.103831	0.0413783	0.103831
D2085.5b.2	WBGene00008430	hgap-2	1.75021e-06	6.83181e-05	0.734236	0.153596	6.34275	0.189084	0.0201515	0.0140404	0.015236	0.015236
F47G3.1	WBGene00018576	F47G3.1	0.000630892	0.0120852	0.73275	0.214381	5.0903	0.216228	0.00641353	0.0625255	0.0321764	0.0625255
T19D7.1	WBGene00020569	lgc-32	6.84127e-06	0.000232368	0.730237	0.162327	5.06564	0.184964	0.00690588	0.0243321	0.032619	0.032619
T07D4.1	WBGene00011578	npr-20	0.0066416	0.0784444	0.729572	0.268788	3.86506	0.179618	0.0214643	0.00345462	0.0869065	0.0869065
M60.4a	WBGene00019780	M60.4	0.000327158	0.00689365	0.727556	0.202505	5.8935	0.208011	0.0156994	0.0458128	0.0196101	0.0458128
B0513.9a	WBGene00007200	vamp-8	0.003764	0.0509258	0.723666	0.249773	4.16619	0.167004	0.0298534	-0.0174835	0.0637268	0.0637268
C06E7.3b	WBGene00015540	sams-4	0.00122631	0.0208528	0.721454	0.223175	6.08946	0.215917	0.0114775	0.0632329	0.0175313	0.0632329
Y34D9A.11	WBGene00021335	spp-23	0.0029334	0.0421199	0.721058	0.242402	5.43641	0.226488	0.00473826	0.0834001	0.0259882	0.0834001
Y70C5C.1	WBGene00013492	Y70C5C.1	0.0054904	0.0675013	0.719723	0.259195	3.92528	0.18891	0.0191954	0.0226912	0.0815779	0.0815779
D1086.7	WBGene00008394	D1086.7	2.97552e-08	1.70135e-06	0.719443	0.129796	5.69913	0.160868	0.00324974	0.00373588	0.0220208	0.0220208
D1053.3	WBGene00008368	D1053.3	0.00209974	0.0322863	0.719431	0.233904	4.15867	0.188616	0.0178576	0.0238201	0.0642091	0.0642091
F23H12.5	WBGene00009094	F23H12.5	0.00335123	0.0469028	0.718189	0.24482	4.04975	0.208685	0.0181958	0.0492377	0.0717094	0.0717094
K02A11.3	WBGene00010488	endu-1	5.00022e-09	3.26046e-07	0.71748	0.122706	5.89075	0.170248	0.00294334	0.0168248	0.0196416	0.0196416
T10G3.1	WBGene00011692	T10G3.1	0.000201297	0.00454006	0.716991	0.192875	4.54303	0.185568	0.0107456	0.0284357	0.0450556	0.0450556
C29F9.2	WBGene00016217	C29F9.2	0.0076688	0.0873031	0.71487	0.268112	3.85362	0.183816	0.019863	0.0182676	0.0879628	0.0879628
C34D10.2a.2	WBGene00016407	C34D10.2	0.000385282	0.00790609	0.713644	0.201029	6.66833	0.201281	0.00223582	0.0583829	0.012756	0.0583829
ZC455.6a	WBGene00013906	ugt-5	6.02007e-07	2.55595e-05	0.710988	0.142466	5.44805	0.158204	0.00465285	0.00353812	0.025792	0.025792
K07C5.5a	WBGene00010628	ceeh-2	5.94303e-05	0.00158367	0.710727	0.177015	4.63034	0.170864	0.00474135	0.0194131	0.0422603	0.0422603
K07C5.5b	WBGene00010628	ceeh-2	5.94303e-05	0.00158367	0.710727	0.177015	4.63034	0.170864	0.00474135	0.0194131	0.0422603	0.0422603
R04B5.5	WBGene00011003	R04B5.5	5.02826e-06	0.000173903	0.709219	0.155408	5.1652	0.173367	0.00538193	0.0227048	0.0308453	0.0308453
C29F3.1	WBGene00001150	ech-1.1	8.82019e-05	0.00223769	0.709118	0.180854	4.7623	0.190104	0.00838585	0.0406763	0.0387602	0.0406763
F47B10.2	WBGene00009813	haly-1	1.55718e-10	1.24339e-08	0.708723	0.110744	6.59982	0.165403	0.00128819	0.0171081	0.0132241	0.0171081
ZK688.2	WBGene00022797	best-24	2.59432e-09	1.76763e-07	0.708231	0.118922	6.24227	0.167448	0.00181707	0.0193967	0.0161085	0.0193967
Y38E10A.14	WBGene00012592	Y38E10A.14	2.58149e-08	1.48351e-06	0.707432	0.12706	5.99731	0.169511	0.0027277	0.0214888	0.0184698	0.0214888
F21A10.2c	WBGene00008999	myrf-2	0.00747651	0.0856712	0.706504	0.26413	6.11413	0.224166	0.0873558	0.00567169	0.0172909	0.0172909
F47G6.2	WBGene00018579	acs-16	0.000477924	0.00951541	0.706489	0.202268	4.40236	0.192267	0.0106879	0.0424733	0.0506808	0.0506808
C54E4.5	WBGene00016920	C54E4.5	0.000105397	0.00260143	0.705615	0.181962	5.67362	0.1891	0.00397299	0.0456921	0.0223673	0.0456921
ZK1055.6b	WBGene00022847	ZK1055.6	6.64694e-06	0.000226444	0.705196	0.156547	5.53487	0.176377	0.0123681	0.0216158	0.0243923	0.0243923
K08B12.1	WBGene00019520	K08B12.1	0.00361386	0.0493937	0.70498	0.242258	4.08184	0.201444	0.0186372	0.0467944	0.0693963	0.0693963
C18C4.5	WBGene00015966	C18C4.5	0.00422053	0.0554783	0.703076	0.245729	5.40183	0.219208	0.0639902	0.0246515	0.0265836	0.0265836
T01G6.2a	WBGene00003721	nhr-131	0.000314649	0.00669204	0.702453	0.194967	4.77404	0.18318	0.0185363	0.0253987	0.038482	0.038482
K08B5.2	WBGene00019519	K08B5.2	0.00029803	0.00636236	0.702389	0.194191	4.55246	0.181589	0.0118337	0.0301461	0.0447313	0.0447313
R03D7.6a	WBGene00001753	gst-5	2.28529e-08	1.32332e-06	0.701938	0.125595	5.87582	0.153464	0.00384729	0.00321422	0.0198139	0.0198139
C07D10.1	WBGene00015566	C07D10.1	0.00665632	0.078486	0.701722	0.258598	4.02046	0.227971	0.0172316	0.0830774	0.0739007	0.0830774
C08D8.2a	WBGene00006582	tmd-2	0.00560522	0.0686534	0.700782	0.252988	4.31766	0.182326	0.0411012	0.00264516	0.054903	0.054903
F58A3.5.1	WBGene00010225	ttr-31	0.000288513	0.00621163	0.699827	0.193034	5.72248	0.175501	0.0341832	0.00153362	0.0217102	0.0217102
K02A6.3b.1	WBGene00019294	K02A6.3	0.000215836	0.00481547	0.698619	0.18883	5.23629	0.170166	0.0239035	0.00577776	0.0295818	0.0295818
Y54E5A.8a	WBGene00013203	Y54E5A.8	0.00241397	0.0360722	0.697412	0.229871	4.45994	0.185714	0.0310768	0.0186724	0.0481846	0.0481846
ZK813.4b	WBGene00022823	ZK813.4	0.00531516	0.0657733	0.696392	0.249846	4.1564	0.190388	0.0292792	0.0268444	0.0643553	0.0643553
K01A2.10a	WBGene00019284	K01A2.10	0.00255613	0.0378711	0.696064	0.230743	4.2144	0.175734	0.0191248	0.0188537	0.0607388	0.0607388
ZK909.6	WBGene00014150	ZK909.6	4.56069e-07	1.98827e-05	0.695137	0.137817	5.51726	0.16589	0.00382275	0.0223342	0.0246674	0.0246674
F27D9.7	WBGene00017865	F27D9.7	0.000762287	0.0140807	0.695058	0.206485	4.39843	0.188661	0.013092	0.0415698	0.0508622	0.0508622
Y55F3BR.6a.2	WBGene00021943	Y55F3BR.6	0.00317598	0.0451724	0.694386	0.235372	4.90528	0.183615	0.0474558	0.00124848	0.0356439	0.0356439
Y62E10A.19	WBGene00013385	Y62E10A.19	0.00667351	0.0786479	0.693721	0.25573	3.9516	0.194388	0.0187297	0.0437876	0.0793667	0.0793667
Y54G2A.29	WBGene00021893	ndnf-1	0.000990753	0.0175051	0.693487	0.210585	5.35148	0.197493	0.00499999	0.0615193	0.0274848	0.0615193
F46G10.2.1	WBGene00009797	F46G10.2	0.00321596	0.0455702	0.692654	0.235092	5.53409	0.210253	0.0306986	0.0522041	0.0244044	0.0522041
C27C12.7.1	WBGene00001055	dpf-2	1.86634e-07	8.92274e-06	0.691943	0.132755	6.21734	0.151587	0.0101054	-0.000166225	0.0163304	0.0163304
B0464.5a.1	WBGene00004980	spk-1	1.17138e-05	0.000374397	0.687393	0.156837	5.40258	0.163674	0.0103264	0.0170748	0.0265704	0.0265704
T07A5.3	WBGene00011556	vglu-3	1.50826e-06	5.9797e-05	0.686858	0.142794	5.42853	0.154122	0.00446284	0.0112742	0.0261222	0.0261222
K10C2.3	WBGene00019619	asp-14	2.06587e-05	0.00061455	0.686545	0.16125	6.36664	0.172605	0.00187474	0.0371275	0.0150345	0.0371275
F13G11.3	WBGene00045038	ule-2	1.08675e-08	6.7022e-07	0.685423	0.1199	7.17346	0.158193	0.000797072	0.0207671	0.0103627	0.0207671
ZK550.2	WBGene00013996	ZK550.2	4.0753e-12	3.98033e-10	0.68428	0.098677	6.61981	0.146572	0.00152151	0.00610342	0.0130842	0.0130842
Y57G11C.9d.3	WBGene00013307	Y57G11C.9	0.0055604	0.0682146	0.684064	0.24672	4.14236	0.203372	0.0260356	0.0527	0.0652702	0.0652702
C38H2.3	WBGene00008020	C38H2.3	0.000577749	0.0112087	0.683932	0.19871	5.01193	0.187712	0.00657247	0.0526563	0.0335977	0.0526563
F20A1.6a	WBGene00017618	F20A1.6	0.000422122	0.00857699	0.683722	0.193917	4.53282	0.148149	0.0109924	-0.00110961	0.0454131	0.0454131
F55E10.7	WBGene00018886	npr-28	0.00320514	0.0455017	0.681644	0.231274	4.67824	0.203576	0.0116887	0.0685426	0.0409021	0.0685426
F54F3.4	WBGene00010063	dhrs-4	2.12551e-06	8.18448e-05	0.681581	0.14376	5.53662	0.164166	0.00418546	0.0268149	0.0243651	0.0268149
T23C6.3	WBGene00020725	cnp-3	0.00543226	0.0668588	0.681321	0.24506	7.21489	0.211325	0.000778967	0.0893028	0.0102309	0.0893028
C31C9.6	WBGene00007840	C31C9.6	3.36085e-05	0.000951278	0.679431	0.163816	5.03295	0.153959	0.00704175	0.0122969	0.0332117	0.0332117
T28H10.3	WBGene00012144	T28H10.3	3.49478e-05	0.000982712	0.677913	0.163804	8.08069	0.170068	0.000353734	0.0398937	0.00889281	0.0398937
K07C5.7	WBGene00010630	ttll-15	0.00117766	0.0201807	0.67734	0.208783	4.76714	0.189945	0.00997828	0.055407	0.0386448	0.055407
T01G5.1	WBGene00011339	T01G5.1	0.0080773	0.0907281	0.673238	0.254165	4.86393	0.213495	0.00855678	0.088343	0.0364911	0.088343
F54D10.3	WBGene00018804	F54D10.3	0.00348033	0.0481188	0.67108	0.229682	4.16969	0.165519	0.0156266	0.0223914	0.063504	0.063504
F46E10.11	WBGene00018492	hpo-26	0.00346988	0.0480316	0.669774	0.229161	4.17987	0.187231	0.0159111	0.0499038	0.0628612	0.0628612
F09A5.9	WBGene00045245	ttr-34	7.80164e-05	0.00202905	0.667321	0.168924	4.90938	0.162872	0.00724132	0.0293552	0.0355618	0.0355618
T23B3.2.2	WBGene00020710	T23B3.2	0.00230701	0.0348378	0.667171	0.218919	5.80781	0.191046	0.00851876	0.0633696	0.0206254	0.0633696
T03F1.10	WBGene00020191	clec-53	0.00339606	0.0472975	0.66653	0.22753	4.19873	0.137273	0.0159645	-0.0109721	0.0616906	0.0616906
Y11D7A.3a	WBGene00012428	Y11D7A.3	2.55559e-06	9.61282e-05	0.665807	0.141551	6.61766	0.157034	0.00648521	0.0235699	0.0130991	0.0235699
C10C5.4	WBGene00007508	C10C5.4	1.59373e-09	1.11596e-07	0.664824	0.110169	6.24474	0.138496	0.00211917	0.00525368	0.0160866	0.0160866
C07B5.4a.2	WBGene00007409	C07B5.4	0.0006566	0.0124935	0.663468	0.194732	4.55051	0.16983	0.012083	0.0351326	0.0447977	0.0447977
F56F11.3.1	WBGene00018990	klf-1	0.000565729	0.0109943	0.662848	0.192267	5.72081	0.17617	0.0035185	0.0519316	0.0217321	0.0519316
F55C12.1b	WBGene00018869	rfip-1	0.000449899	0.00904449	0.662546	0.188817	5.96368	0.174472	0.033715	0.0197627	0.0188291	0.0197627
T25C12.1a	WBGene00003003	lin-14	0.000444697	0.0089716	0.661636	0.188391	5.25182	0.162994	0.0239332	0.0156479	0.0293037	0.0293037
Y46E12BL.4f.1	WBGene00021597	spsb-1	0.00196153	0.0306076	0.661244	0.21358	5.19075	0.185913	0.0367147	0.0317102	0.0303924	0.0317102
T01B6.3a	WBGene00020135	aakg-4	0.000268233	0.00580798	0.661134	0.181421	5.10531	0.170626	0.00714161	0.0422289	0.0319084	0.0422289
F13H10.5	WBGene00008776	F13H10.5	0.00898839	0.0985777	0.659502	0.252441	3.97845	0.147541	0.018408	0.00291526	0.0771819	0.0771819
C32D5.1	WBGene00016310	C32D5.1	0.0046683	0.0599868	0.65822	0.232663	4.14321	0.149082	0.0159837	0.00789901	0.0652142	0.0652142
Y105C5A.8a.1	WBGene00013633	Y105C5A.8	1.386e-05	0.00043089	0.658033	0.151409	5.95794	0.150607	0.0154955	0.0103858	0.0188914	0.0188914
C29G2.6	WBGene00016234	C29G2.6	2.03636e-07	9.65445e-06	0.655052	0.126069	5.80289	0.132187	0.00315414	0.00116935	0.0206858	0.0206858
M01G12.12	WBGene00004509	rrf-2	0.00024619	0.0054095	0.654692	0.178575	5.80526	0.166853	0.00293924	0.0448945	0.0206567	0.0448945
C54A12.1	WBGene00016908	ptr-6	0.000595295	0.0114904	0.652773	0.190105	4.56694	0.140558	0.00996526	0.00593989	0.0442447	0.0442447
Y82E9BL.13	WBGene00022329	fbxa-79	0.000799073	0.0146531	0.650701	0.194059	4.55678	0.147172	0.0119035	0.013282	0.0445847	0.0445847
B0222.4	WBGene00006418	tag-38	3.67534e-05	0.00102751	0.650673	0.157663	5.11518	0.133619	0.00555351	0.00270475	0.0317327	0.0317327
K10C2.8	WBGene00045265	K10C2.8	0.000245292	0.00539857	0.65042	0.177365	4.79816	0.151574	0.0092628	0.0215619	0.0379247	0.0379247
F58B3.6	WBGene00010232	F58B3.6	0.0020407	0.0315063	0.650116	0.210786	8.58219	0.180112	0.000180198	0.066466	0.00916089	0.066466
T05H10.3	WBGene00011508	T05H10.3	0.000125392	0.00303245	0.648431	0.169068	4.97891	0.16044	0.00753101	0.0353448	0.0342139	0.0353448
C48B4.4a	WBGene00000421	ced-7	1.77303e-08	1.06461e-06	0.645857	0.11466	7.54762	0.140916	0.00901824	0.0107021	0.00940717	0.0107021
C37H5.2	WBGene00016506	abhd-5.1	0.00387913	0.0522043	0.645718	0.2236	4.22082	0.152406	0.0146415	0.0195095	0.060354	0.060354
C28C12.7a	WBGene00004995	spp-10	5.80436e-16	9.3021e-14	0.645159	0.0797146	8.70283	0.127819	0.000196708	0.00349071	0.00933493	0.00933493
T28A11.2	WBGene00020869	T28A11.2	2.95906e-09	1.98641e-07	0.644279	0.108577	6.26684	0.130729	0.00179161	0.00595863	0.0158918	0.0158918
C15B12.8	WBGene00015788	C15B12.8	0.000131954	0.00317111	0.643342	0.168291	4.94202	0.13594	0.00756376	0.00715347	0.0349192	0.0349192
Y38C1AA.6	WBGene00021397	Y38C1AA.6	0.00348251	0.0481188	0.643108	0.220123	4.26895	0.173864	0.0151171	0.0471179	0.0575639	0.0575639
T19A5.3a	WBGene00020554	T19A5.3	0.000233485	0.00517878	0.642837	0.174697	4.84537	0.160431	0.00889439	0.0366796	0.0368842	0.0368842
E03E2.1.3	WBGene00017108	cyp-43A1	2.59605e-07	1.19592e-05	0.642516	0.124745	6.05451	0.142522	0.00454536	0.0187966	0.0178796	0.0187966
T12B5.11	WBGene00020457	fbxa-67	0.000387381	0.00794202	0.639652	0.180258	4.7302	0.150942	0.00919424	0.0260504	0.0395452	0.0395452
C26E1.2b	WBGene00007748	C26E1.2	0.00351138	0.0482831	0.6396	0.219115	4.55414	0.173679	0.0273429	0.0363471	0.0446742	0.0446742
C53B7.3b	WBGene00016894	C53B7.3	1.84555e-05	0.000562991	0.63932	0.149276	5.84373	0.139183	0.0132338	0.00747101	0.0201912	0.0201912
F09B9.4	WBGene00008603	F09B9.4	1.0378e-07	5.3554e-06	0.638242	0.119971	5.96359	0.136404	0.00275936	0.0149888	0.0188301	0.0188301
C04A11.4	WBGene00000074	adm-2	4.22204e-08	2.3208e-06	0.638168	0.116426	7.09152	0.138444	0.000841121	0.0194915	0.0106432	0.0194915
M01A10.2a	WBGene00006594	tom-1	0.000960739	0.0170809	0.63643	0.192754	5.5069	0.166098	0.0283921	0.027339	0.0248314	0.027339
C31C9.7.1	WBGene00007841	C31C9.7	3.41434e-06	0.000123924	0.633345	0.136374	5.64127	0.131718	0.00507908	0.00914667	0.0228177	0.0228177
F52H3.7a.2	WBGene00002265	lec-2	7.51623e-06	0.00025191	0.632879	0.141314	7.5497	0.144124	0.00159744	0.0283572	0.00940331	0.0283572
C02C2.5	WBGene00015334	sup-18	0.00781142	0.0884841	0.632392	0.237731	4.09476	0.167195	0.0162847	0.0427392	0.0684894	0.0684894
B0379.4b	WBGene00007054	scpl-1	0.00015935	0.0037193	0.629625	0.166743	5.22924	0.133636	0.0119968	0.00638789	0.0297079	0.0297079
C27B7.7a	WBGene00007764	C27B7.7	0.0032986	0.0463331	0.628577	0.213915	5.47974	0.173444	0.0170148	0.0516245	0.0252685	0.0516245
B0403.6	WBGene00043982	B0403.6	0.00205457	0.0316989	0.627132	0.203467	4.41268	0.127123	0.0118872	-0.000468868	0.050211	0.050211
R11H6.4a	WBGene00011252	R11H6.4	0.00654749	0.0778074	0.626634	0.230463	4.45344	0.181537	0.013731	0.0659386	0.0484516	0.0659386
ZK930.2	WBGene00014152	ZK930.2	4.21011e-06	0.000149469	0.626214	0.136112	5.55469	0.135994	0.00370207	0.0192364	0.0240876	0.0240876
B0272.4	WBGene00007130	B0272.4	0.00071602	0.013389	0.626178	0.185075	5.47846	0.158733	0.00433962	0.0470397	0.0252892	0.0470397
C37H5.3b	WBGene00016507	abhd-5.2	0.00516512	0.0643717	0.625661	0.223726	5.53954	0.177499	0.023291	0.0517889	0.02432	0.0517889
Y39A3CL.6	WBGene00004249	pvf-1	4.55645e-07	1.98827e-05	0.624422	0.123792	5.83483	0.124422	0.0026893	0.0066242	0.0202975	0.0202975
K02F3.4.2	WBGene00019327	zip-2	0.00663605	0.0784444	0.623911	0.229837	8.32298	0.180169	0.000232162	0.0790055	0.00893302	0.0790055
C11E4.2	WBGene00007517	gpx-3	0.00127511	0.0215428	0.62041	0.192583	4.59897	0.130838	0.0124189	0.00678767	0.0432134	0.0432134
Y106G6A.2a	WBGene00013695	epg-8	0.000247765	0.0054372	0.61904	0.168926	6.22494	0.149206	0.00844278	0.0343612	0.0162624	0.0343612
F48E8.1a.1	WBGene00003055	lon-1	0.00827026	0.0921491	0.618997	0.234395	7.32095	0.180876	0.030211	0.0522002	0.00992343	0.0522002
K08F8.1a.2	WBGene00010681	mak-1	1.27154e-12	1.32736e-10	0.61824	0.0871083	7.70607	0.120175	0.00222411	0.00466142	0.00915767	0.00915767
F41E6.5b.1	WBGene00018286	F41E6.5	0.0014916	0.0245439	0.616703	0.194157	4.96601	0.120774	0.0220869	-0.0137408	0.0344583	0.0344583
C03G6.19	WBGene00005647	srp-6	3.58152e-07	1.61071e-05	0.616553	0.121131	5.93112	0.123198	0.0028231	0.00862286	0.0191861	0.0191861
F13H6.3	WBGene00017431	F13H6.3	1.14404e-05	0.000366688	0.616319	0.140456	6.42654	0.137628	0.00151826	0.0280736	0.0145409	0.0280736
R07C12.2	WBGene00019932	R07C12.2	3.3778e-07	1.5282e-05	0.615218	0.120606	5.95857	0.125089	0.00293423	0.0114919	0.0188846	0.0188846
Y46G5A.18a.2	WBGene00012908	Y46G5A.18	0.00223402	0.0338978	0.6152	0.201229	6.82885	0.162133	0.00805789	0.0526817	0.0117921	0.0526817
ZK643.3b	WBGene00014035	seb-2	0.000521829	0.0102616	0.615058	0.177286	4.74768	0.127915	0.00803244	0.01	0.0391132	0.0391132
K02A11.4	WBGene00044607	K02A11.4	0.00140785	0.0233858	0.61488	0.192569	4.5488	0.148064	0.0107679	0.0325326	0.0448563	0.0448563
C01A2.2a	WBGene00007214	C01A2.2	0.00584897	0.0711792	0.613386	0.222553	4.25997	0.122089	0.016223	-0.00470205	0.058072	0.058072
K02D7.1a.2	WBGene00019298	K02D7.1	5.32598e-11	4.53945e-09	0.61217	0.0932969	7.10187	0.121598	0.00245012	0.0090154	0.0106063	0.0106063
F36F2.2	WBGene00009476	F36F2.2	4.41224e-06	0.000154953	0.611127	0.133116	5.63255	0.124997	0.00363822	0.0125543	0.0229414	0.0229414
ZK1290.12	WBGene00006947	wrt-1	0.00185716	0.0293293	0.609797	0.19594	4.738	0.157627	0.00980444	0.047784	0.0393511	0.047784
C29F7.1	WBGene00007810	C29F7.1	0.00305115	0.043615	0.609655	0.205788	4.38839	0.147458	0.0121909	0.0327521	0.0513323	0.0513323
R09F10.5	WBGene00019988	R09F10.5	0.00518469	0.0645096	0.607855	0.217454	4.25057	0.141186	0.0123195	0.0256047	0.0586097	0.0586097
T28B4.3	WBGene00020886	ttr-6	7.78751e-14	9.32739e-12	0.606436	0.0811409	7.61943	0.114978	0.000592923	0.00521782	0.00928284	0.00928284
F48D6.4a	WBGene00018602	F48D6.4	4.71832e-06	0.000164685	0.606336	0.132476	6.41242	0.131353	0.00304821	0.0232768	0.0146556	0.0232768
F59C12.1	WBGene00000401	cdh-9	0.00465808	0.0598893	0.605302	0.213905	4.32715	0.164824	0.0129567	0.0556762	0.0544034	0.0556762
Y102A5C.3	WBGene00013612	fbxa-207	0.000183358	0.00418104	0.604069	0.161477	5.05667	0.11409	0.00633138	-0.000556789	0.0327807	0.0327807
T22H6.2a	WBGene00011938	alh-13	1.21904e-08	7.41758e-07	0.603212	0.105882	6.81268	0.11323	0.00493608	0.000152002	0.0118803	0.0118803
C44F1.3.2	WBGene00002267	lec-4	8.24073e-09	5.19072e-07	0.600919	0.104264	6.8084	0.120526	0.00440234	0.0108409	0.011904	0.011904
Y71G12B.25a	WBGene00022160	Y71G12B.25	0.00258704	0.0382047	0.599881	0.199099	5.04075	0.155526	0.00932798	0.0501329	0.0330695	0.0501329
F31D4.4	WBGene00009291	clec-264	0.000145639	0.00344882	0.597597	0.157329	5.16466	0.12386	0.00627376	0.0146305	0.0308549	0.0308549
F31C3.6a	WBGene00009288	F31C3.6	0.00620862	0.0744021	0.597405	0.218305	4.77009	0.164256	0.0300662	0.0414197	0.038575	0.0414197
K08B4.6	WBGene00000535	cpi-1	4.05977e-09	2.67792e-07	0.597218	0.101538	8.23361	0.119373	0.000282306	0.0151825	0.00889903	0.0151825
ZK867.3	WBGene00044283	spp-22	0.00198411	0.0308841	0.596159	0.192769	4.55469	0.11912	0.0110847	0.00453848	0.0446554	0.0446554
C02F12.7	WBGene00015356	tag-278	0.0036453	0.0496446	0.594185	0.204375	6.1562	0.15604	0.00197539	0.0606784	0.0168907	0.0606784
Y38C9A.2a.2	WBGene00000480	cgp-1	0.00127654	0.0215506	0.591714	0.183694	8.21624	0.14553	0.00090013	0.0497148	0.00889503	0.0497148
C29F5.1	WBGene00016210	C29F5.1	1.0417e-06	4.29458e-05	0.591286	0.121076	6.78937	0.122477	0.0010617	0.0209274	0.0120111	0.0209274
F35H8.5	WBGene00001368	exc-7	0.00386454	0.0520694	0.590946	0.204549	5.83585	0.154974	0.00285058	0.0599101	0.0202854	0.0599101
Y79H2A.1a	WBGene00000273	brp-1	2.82389e-11	2.46219e-09	0.590209	0.0886803	9.12389	0.113941	0.000937345	0.0108589	0.010316	0.0108589
F10E9.12	WBGene00017361	F10E9.12	1.30201e-05	0.000409816	0.589796	0.135281	5.63303	0.126319	0.00395138	0.0235002	0.0229345	0.0235002
Y32B12C.5	WBGene00194769	Y32B12C.5	0.00513099	0.0640644	0.589388	0.210594	4.34963	0.116967	0.0132828	0.00265867	0.053242	0.053242
E04F6.9	WBGene00017128	E04F6.9	1.0557e-09	7.55486e-08	0.588489	0.0964616	6.68291	0.111888	0.00129666	0.00869423	0.0126606	0.0126606
F55A11.6a	WBGene00010079	F55A11.6	0.00254341	0.0377563	0.588091	0.194853	4.96524	0.149317	0.015516	0.0414356	0.0344729	0.0414356
C03A7.11	WBGene00015369	ugt-51	9.38659e-05	0.00236034	0.587739	0.150474	5.28351	0.117643	0.0052313	0.012283	0.0287322	0.0287322
B0336.11a	WBGene00015148	hpo-28	0.00129742	0.0218868	0.58615	0.182229	4.69511	0.106609	0.00936234	-0.00494026	0.040449	0.040449
B0302.5	WBGene00015122	B0302.5	6.89435e-07	2.89474e-05	0.584347	0.117709	6.00171	0.115374	0.00235976	0.0138091	0.0184235	0.0184235
ZK287.3	WBGene00013964	nlp-73	0.000160564	0.0037438	0.583981	0.154732	5.18901	0.111894	0.00548985	0.00649048	0.0304233	0.0304233
F13D2.1b	WBGene00008735	F13D2.1	0.000744098	0.0138345	0.58332	0.172949	5.89489	0.137972	0.0101213	0.0347456	0.0195943	0.0347456
ZK892.2.2	WBGene00003773	nlt-1	6.67234e-10	4.88239e-08	0.581778	0.0942354	6.82339	0.109025	0.00149883	0.00785815	0.0118216	0.0118216
ZK909.2c.2	WBGene00002189	kin-1	0.00457509	0.0589221	0.58159	0.205109	4.48023	0.13528	0.015732	0.026526	0.0473722	0.0473722
Y94H6A.6	WBGene00006705	ubc-8	0.000248982	0.00545316	0.580604	0.158492	5.61047	0.131274	0.00410993	0.0335695	0.0232586	0.0335695
T13A10.5b	WBGene00003754	nlp-16	0.0016541	0.0267157	0.577521	0.183562	5.0464	0.140493	0.0139274	0.036615	0.0329668	0.036615
T08B1.6	WBGene00020343	acs-3	0.000308312	0.00656338	0.577367	0.160015	5.04311	0.106565	0.00538036	0.00281859	0.0330267	0.0330267
W03F11.1a	WBGene00021005	ule-1	0.00510331	0.0639055	0.575861	0.205632	7.86269	0.150226	0.00467311	0.0587539	0.0089973	0.0587539
C37H5.3a	WBGene00016507	abhd-5.2	0.0019028	0.0298428	0.574208	0.18493	5.46168	0.139953	0.0204497	0.0308491	0.025565	0.0308491
F01G10.2	WBGene00001157	ech-8	0.00216751	0.033127	0.57354	0.187048	5.76113	0.140669	0.00265024	0.0498304	0.0212092	0.0498304
K11D2.2.3	WBGene00010769	asah-1	0.000801156	0.0146795	0.570803	0.170267	6.73713	0.132534	0.00429809	0.0391882	0.0123193	0.0391882
R102.5a	WBGene00011292	allo-1	7.95499e-05	0.00206186	0.570334	0.144544	8.27776	0.122656	0.000656391	0.0306829	0.00891301	0.0306829
F20D6.10	WBGene00017639	F20D6.10	0.00169108	0.027178	0.568984	0.181221	4.70065	0.125512	0.0089587	0.0265275	0.0403029	0.0403029
K06A1.6	WBGene00019428	dgk-5	0.000322458	0.00683257	0.56559	0.157259	5.1412	0.103659	0.00582485	0.00378942	0.0312706	0.0312706
Y48B6A.8	WBGene00000037	ace-3	0.00907992	0.0991039	0.565229	0.216643	4.31226	0.133527	0.0152113	0.0318904	0.0551903	0.0551903
ZC328.3a	WBGene00022593	ZC328.3	2.34662e-06	8.90036e-05	0.564577	0.119588	6.13419	0.107238	0.00435336	0.0101636	0.0170986	0.0170986
M02B1.2.2	WBGene00010827	M02B1.2	0.00175013	0.028028	0.564229	0.180285	5.58492	0.134509	0.00477758	0.0439763	0.0236333	0.0439763
B0222.8	WBGene00000599	col-10	0.00246908	0.0367727	0.563657	0.186203	6.02428	0.136919	0.00527573	0.0467318	0.0181883	0.0467318
C27A7.5e	WBGene00007756	C27A7.5	0.00409599	0.0544147	0.563135	0.196168	6.03737	0.110379	0.0396692	-0.0206154	0.0180538	0.0180538
ZK1055.7	WBGene00022848	ZK1055.7	0.00492135	0.0621849	0.562834	0.200144	6.54591	0.143104	0.00145137	0.0586353	0.0136143	0.0586353
F29B9.1.1	WBGene00017919	F29B9.1	0.000929495	0.0166156	0.561333	0.169534	5.40202	0.128655	0.0165322	0.0261262	0.0265802	0.0265802
C03H5.1.2	WBGene00015403	clec-10	0.00010288	0.00255038	0.560925	0.144431	5.40287	0.108474	0.00472503	0.0128785	0.0265653	0.0265653
C42D4.1.2	WBGene00016594	C42D4.1	7.53227e-10	5.47642e-08	0.560765	0.0911149	8.66389	0.1043	0.00100534	0.0114475	0.00927387	0.0114475
F39E9.2	WBGene00018195	btb-16	0.00414891	0.0548935	0.558522	0.194837	4.53284	0.103854	0.0115298	0.00130737	0.0454123	0.0454123
K11C4.4	WBGene00003844	odc-1	0.00388391	0.0522377	0.557656	0.193132	7.81913	0.138054	0.000362699	0.055587	0.00903436	0.055587
ZK669.3	WBGene00014053	ZK669.3	0.00231995	0.0349636	0.557567	0.183056	5.7905	0.133475	0.00306811	0.0471959	0.0208393	0.0471959
K03H1.5	WBGene00010540	K03H1.5	4.93831e-06	0.000171052	0.557529	0.122067	6.15865	0.111132	0.00177596	0.0205747	0.0168678	0.0205747
C53A5.6a	WBGene00008266	C53A5.6	0.000706514	0.0132768	0.556815	0.164396	7.08442	0.125444	0.00696771	0.0335712	0.0106688	0.0335712
ZK121.2	WBGene00022664	ZK121.2	0.00116434	0.0199825	0.556287	0.171298	5.89982	0.128048	0.00261298	0.0414017	0.0195381	0.0414017
C18A3.4a.1	WBGene00015942	osta-2	4.26497e-05	0.00117504	0.554226	0.13542	5.90058	0.114156	0.00550954	0.0219985	0.0195293	0.0219985
F54B11.5	WBGene00010028	F54B11.5	0.00801871	0.0901589	0.554026	0.208965	6.22516	0.144483	0.0020174	0.0634825	0.0162604	0.0634825
F58E10.7	WBGene00010262	droe-4	0.00510525	0.0639055	0.551109	0.196802	4.90024	0.137594	0.00747102	0.0506258	0.0357451	0.0506258
F55B11.4	WBGene00010086	F55B11.4	0.000112997	0.00277099	0.548367	0.142033	6.80521	0.11442	0.00114877	0.0291113	0.0119218	0.0291113
F54F7.3	WBGene00010065	F54F7.3	0.00265917	0.0390669	0.547925	0.182361	5.67129	0.129973	0.00307252	0.0468108	0.0223993	0.0468108
Y48A6B.9a	WBGene00012970	Y48A6B.9	0.00178793	0.0284729	0.546667	0.175025	4.84077	0.122559	0.00896749	0.0321645	0.036983	0.036983
C13E3.1	WBGene00015740	C13E3.1	0.00541225	0.0667207	0.545106	0.195982	4.5047	0.134166	0.0111776	0.0451021	0.0464355	0.0464355
K07C5.2	WBGene00010625	K07C5.2	1.39279e-08	8.42972e-07	0.541663	0.0954595	6.70389	0.0903856	0.00114281	0.00181457	0.012526	0.012526
Y87G2A.2	WBGene00013594	Y87G2A.2	8.75642e-05	0.00222648	0.541276	0.137986	5.62268	0.110742	0.00409372	0.0244664	0.0230824	0.0244664
F28H6.1a	WBGene00000103	akt-2	8.86565e-05	0.00224672	0.540529	0.1379	5.56631	0.103427	0.00461323	0.0151063	0.0239115	0.0239115
ZC196.5	WBGene00022549	ZC196.5	0.00438807	0.0569989	0.54014	0.189601	4.59113	0.0983376	0.0104624	0.00305304	0.0434603	0.0434603
F59B1.8	WBGene00019100	F59B1.8	2.91476e-05	0.000836458	0.539642	0.1291	5.70946	0.100684	0.00311765	0.0135327	0.0218826	0.0218826
B0496.3h	WBGene00006814	unc-82	0.00407435	0.0542717	0.537702	0.1872	5.7787	0.0962911	0.0315787	-0.0196362	0.0209868	0.0209868
F08G5.6.1	WBGene00008584	irg-4	0.00168235	0.0270631	0.537149	0.170999	5.48853	0.121648	0.00442842	0.0394326	0.0251258	0.0394326
F08B6.4a.1	WBGene00006819	unc-87	0.00135756	0.0227162	0.536697	0.167533	5.50919	0.119047	0.017306	0.0234867	0.024795	0.024795
C06H5.7.1	WBGene00007395	dcar-1	2.65005e-05	0.000768245	0.536546	0.1277	5.97595	0.105933	0.00263802	0.0218228	0.018697	0.0218228
Y7A9C.1	WBGene00012418	Y7A9C.1	0.00680925	0.0798722	0.535925	0.198048	4.47867	0.100654	0.0114013	0.00671063	0.0474335	0.0474335
W02D9.6	WBGene00012212	W02D9.6	2.76853e-05	0.000798522	0.535696	0.127799	5.91255	0.10569	0.00270423	0.0217946	0.0193939	0.0217946
F25H9.5a.2	WBGene00001496	frm-10	0.00014606	0.0034516	0.535305	0.140956	7.13216	0.0980922	0.0193021	-0.00414367	0.0105008	0.0105008
C47A10.5a	WBGene00008127	ddo-1	0.00739873	0.0849938	0.53177	0.198544	4.5442	0.0953945	0.014115	-0.000914254	0.0450148	0.0450148
B0507.2	WBGene00015219	B0507.2	0.00101387	0.0178305	0.530806	0.161504	6.20933	0.115827	0.00165193	0.0374733	0.0164024	0.0374733
K07C11.3	WBGene00019476	timp-1	9.76167e-06	0.000317806	0.530062	0.119859	5.95846	0.0905489	0.00266347	0.00516069	0.0188857	0.0188857
F41C3.3.1	WBGene00018269	acs-11	5.82288e-05	0.00155712	0.529466	0.131712	7.67714	0.104918	0.000477889	0.0255442	0.00919644	0.0255442
D1086.10c	WBGene00044080	D1086.10	1.65422e-06	6.50175e-05	0.528639	0.110325	6.53844	0.0920915	0.00458764	0.00572969	0.0136698	0.0136698
T24H10.7a	WBGene00012005	jun-1	0.00292548	0.0420564	0.52815	0.177502	5.47253	0.0867374	0.0218742	-0.0180558	0.0253862	0.0253862
C32D5.6	WBGene00016314	C32D5.6	0.00135094	0.0226554	0.527634	0.164632	4.96515	0.088569	0.0061808	0.000131354	0.0344746	0.0344746
F02C12.1	WBGene00008515	F02C12.1	0.001631	0.0264316	0.527078	0.16731	5.9489	0.116935	0.00280254	0.0391865	0.01899	0.0391865
F15G9.1a	WBGene00008865	F15G9.1	9.91397e-05	0.00247653	0.526509	0.135256	5.86066	0.102889	0.0074503	0.0172069	0.019991	0.019991
T01A4.1a	WBGene00020131	gcy-28	0.00365579	0.0497185	0.52639	0.181112	5.69218	0.122488	0.0165581	0.0326443	0.0221143	0.0326443
F17H10.2b	WBGene00008926	F17H10.2	0.00525074	0.0650823	0.526356	0.188575	5.16642	0.0983658	0.0225167	-0.00345342	0.0308238	0.0308238
Y49E10.16a	WBGene00013035	Y49E10.16	1.55621e-06	6.13771e-05	0.526203	0.109537	6.75464	0.0974648	0.00202597	0.0159716	0.0122137	0.0159716
F42G10.2	WBGene00003368	mkk-4	1.07189e-05	0.000345509	0.524991	0.119258	5.97374	0.0979531	0.0026131	0.0164724	0.0187207	0.0187207
H29C22.1	WBGene00045261	H29C22.1	7.04443e-06	0.000237145	0.524732	0.116806	6.73342	0.0989756	0.00133307	0.0191324	0.0123419	0.0191324
F41B5.2	WBGene00018260	cyp-33C7	0.00202393	0.0313324	0.52407	0.169783	4.90362	0.112467	0.00756247	0.0300273	0.0356771	0.0356771
C04E12.2	WBGene00015433	C04E12.2	0.00214835	0.0329447	0.523331	0.170526	4.87402	0.10675	0.0073378	0.0233963	0.0362809	0.0362809
F44C8.1	WBGene00018413	cyp-33C4	0.00362302	0.0494002	0.522777	0.179695	4.72514	0.0879464	0.00876269	-0.00131541	0.0396727	0.0396727
F53C11.3	WBGene00009973	F53C11.3	1.59771e-05	0.000490013	0.52115	0.120783	7.23999	0.0989853	0.000774273	0.0211085	0.0101543	0.0211085
Y37E11AR.2	WBGene00021369	siah-1	0.00446677	0.0578215	0.520649	0.183123	7.10652	0.121563	0.000842695	0.0494582	0.0105899	0.0494582
W07A8.2b	WBGene00012319	ipla-3	0.00191659	0.0300178	0.520246	0.167667	6.42523	0.101119	0.0276167	-0.00271401	0.0145514	0.0145514
E04F6.3	WBGene00017123	maoc-1	0.00163628	0.0264842	0.519584	0.164981	6.90497	0.113653	0.00105576	0.0397722	0.0114048	0.0397722
Y54E10A.17.1	WBGene00021835	Y54E10A.17	1.87246e-05	0.000568154	0.519381	0.121363	6.54592	0.0949565	0.00847909	0.00905773	0.0136142	0.0136142
T08A9.8.1	WBGene00004989	spp-4	0.000179766	0.00412384	0.518083	0.138308	6.3149	0.103478	0.0128761	0.0158173	0.0154741	0.0158173
Y32F6B.1	WBGene00012531	Y32F6B.1	1.47824e-07	7.32904e-06	0.517595	0.098491	6.63352	0.0874426	0.00156088	0.00727822	0.0129898	0.0129898
M79.2	WBGene00010902	M79.2	1.14676e-06	4.67684e-05	0.516967	0.106271	6.36126	0.0931956	0.00186058	0.0144135	0.0150796	0.0150796
T22G5.2	WBGene00002259	lbp-7	4.31636e-06	0.000152764	0.51672	0.112439	6.15535	0.0916153	0.00206529	0.0123291	0.0168987	0.0168987
F55C10.5	WBGene00010109	F55C10.5	0.00644793	0.0767847	0.515	0.189054	4.59132	0.0969753	0.0101579	0.0116021	0.0434542	0.0434542
F52H3.5	WBGene00009947	ttc-36	0.000184641	0.00420609	0.51422	0.137523	5.55624	0.0946828	0.00430482	0.0148903	0.0240641	0.0240641
C44H9.5	WBGene00008100	C44H9.5	0.000121277	0.00294862	0.514173	0.133776	5.58857	0.0921026	0.00326491	0.0127232	0.0235792	0.0235792
M01A8.2b	WBGene00010796	clip-1	0.00501341	0.0630296	0.513085	0.182842	5.85754	0.119094	0.0125383	0.0376084	0.0200276	0.0376084
C49G7.4	WBGene00016782	phat-3	0.001894	0.0297379	0.512501	0.164984	5.28949	0.111461	0.00539054	0.0354389	0.0286236	0.0354389
H24K24.5a	WBGene00001480	fmo-5	0.000176542	0.00406636	0.512356	0.136613	5.68203	0.0937869	0.00574257	0.0130504	0.0222521	0.0222521
F58B3.1	WBGene00003093	lys-4	0.0045372	0.0585999	0.509928	0.179667	7.41612	0.116744	0.000577754	0.0478428	0.00968357	0.0478428
Y57G11A.1b	WBGene00013289	tag-273	6.75118e-05	0.00177615	0.506018	0.126984	6.54745	0.0961662	0.00348263	0.0207048	0.0136029	0.0207048
T05H4.13a.1	WBGene00000110	alh-4	0.000709459	0.0133101	0.50551	0.149299	6.67733	0.10341	0.00736979	0.0260653	0.012697	0.0260653
ZK813.2	WBGene00022821	ZK813.2	2.11552e-05	0.000625375	0.503097	0.118311	7.22463	0.0927288	0.000726949	0.0202692	0.0102009	0.0202692
E03D2.2a	WBGene00003747	nlp-9	0.00263718	0.0388191	0.500012	0.166275	5.04961	0.0821585	0.00856247	0.000381079	0.0329086	0.0329086
H16O14.1b	WBGene00019205	kcc-2	0.000707741	0.0132888	0.498719	0.147264	6.63339	0.10064	0.0126296	0.0199005	0.0129907	0.0199005
Y48D7A.2.2	WBGene00001461	flp-18	0.00528766	0.0655043	0.498145	0.178613	5.10257	0.084819	0.0158965	-0.00292836	0.0319573	0.0319573
VZK822L.1a.1	WBGene00001398	fat-6	8.77728e-05	0.00222929	0.494889	0.126179	7.55307	0.0925799	0.00546422	0.0184175	0.00939708	0.0184175
T24B8.4d.2	WBGene00011978	T24B8.4	0.00192436	0.0301188	0.493371	0.159067	6.03863	0.103387	0.00639302	0.0315603	0.0180408	0.0315603
K08B4.3	WBGene00019515	ugt-19	0.00041189	0.00840545	0.492129	0.139321	5.73752	0.0959495	0.00295866	0.0261567	0.0215132	0.0261567
C08G9.1	WBGene00015619	C08G9.1	0.00124466	0.021076	0.491214	0.152152	5.23954	0.0887963	0.00520164	0.0153094	0.0295237	0.0295237
Y57A10C.6	WBGene00013284	daf-22	0.00273079	0.0398107	0.489911	0.163493	7.03486	0.10408	0.00096991	0.0391251	0.0108528	0.0391251
VC5.5	WBGene00003725	nhr-135	0.003248	0.0457976	0.489731	0.166392	4.94883	0.0917848	0.00674196	0.0180504	0.0347875	0.0347875
C33G8.6	WBGene00003632	nhr-42	0.00277591	0.0403252	0.488746	0.163377	5.02229	0.0945165	0.00663101	0.0219375	0.033407	0.033407
C01B10.3	WBGene00015278	C01B10.3	3.00382e-05	0.000858767	0.486593	0.1166	6.03701	0.0746213	0.00233598	0.00215085	0.0180574	0.0180574
M04G12.1c.2	WBGene00010867	tag-260	0.00164422	0.0265938	0.486451	0.15453	5.92367	0.0856077	0.0165501	0.00172146	0.0192691	0.0192691
F40D4.17	WBGene00194682	F40D4.17	0.00542743	0.0668355	0.483683	0.173955	4.87192	0.106497	0.00799769	0.0373929	0.0363244	0.0373929
C36H8.3	WBGene00001452	flp-9	0.000170286	0.00394678	0.477817	0.127097	5.7369	0.0756133	0.00270932	0.00619152	0.0215213	0.0215213
F25C8.4	WBGene00009106	acs-12	0.00067356	0.0127523	0.477008	0.140292	5.46904	0.0791872	0.00407906	0.00957861	0.0254435	0.0254435
F48D6.4b	WBGene00018602	F48D6.4	0.00342008	0.0475738	0.475026	0.162279	7.09769	0.0992962	0.001206	0.0382956	0.0106212	0.0382956
D2023.2a.1	WBGene00004258	pyc-1	0.00193548	0.0302511	0.474862	0.153183	7.88807	0.0958064	0.0128119	0.0223858	0.00897822	0.0223858
F20D1.3	WBGene00008975	F20D1.3	0.00075608	0.0139887	0.473781	0.140655	7.70198	0.0910811	0.000522657	0.0291531	0.00916297	0.0291531
F21A3.11	WBGene00219316	F21A3.11	1.36944e-05	0.000426325	0.47345	0.108872	6.29435	0.0744199	0.00212786	0.00683891	0.0156516	0.0156516
T06C12.5	WBGene00011514	fbxa-198	0.00405791	0.0541936	0.472901	0.164566	4.99664	0.0826592	0.00674144	0.0127193	0.0338815	0.0338815
C16A3.7	WBGene00015812	nfx-1	0.00355462	0.0488187	0.472448	0.162064	9.19169	0.0984795	0.0001057	0.0392912	0.0105339	0.0392912
B0238.1	WBGene00015067	B0238.1	0.00578405	0.0705778	0.472307	0.171139	4.85983	0.0756957	0.00735585	0.0036112	0.0365771	0.0365771
F59F4.1	WBGene00010336	acox-1.6	0.00157934	0.0257642	0.471968	0.149371	5.28089	0.0810696	0.004688	0.0131164	0.0287797	0.0287797
C53B7.1	WBGene00004370	rig-3	0.000226726	0.00503376	0.470363	0.127566	5.93384	0.0859	0.00251766	0.021892	0.0191559	0.021892
C35C5.8a	WBGene00007957	C35C5.8	0.0085218	0.094462	0.470256	0.178759	4.74676	0.0749019	0.00879677	0.00190283	0.0391356	0.0391356
K02E10.8b	WBGene00006365	syg-1	0.00685746	0.0801928	0.469355	0.173598	5.32212	0.102252	0.00705014	0.0381544	0.0280267	0.0381544
F36H5.2b.1	WBGene00018101	math-27	0.004118	0.054552	0.467474	0.162941	5.23656	0.0787423	0.0102475	0.00623111	0.0295771	0.0295771
F36H5.2c.1	WBGene00018101	math-27	0.004118	0.054552	0.467474	0.162941	5.23656	0.0787423	0.0102475	0.00623111	0.0295771	0.0295771
C40D2.2	WBGene00016555	math-20	0.00544906	0.0670293	0.466887	0.167993	4.92943	0.0914655	0.00716734	0.0254206	0.0351649	0.0351649
K11D12.10c	WBGene00003374	mlk-1	0.000558184	0.0108662	0.466829	0.135267	6.04374	0.0828217	0.0094571	0.0123466	0.0179887	0.0179887
C24G6.2a	WBGene00016059	hir-1	0.00152449	0.0250128	0.465136	0.146732	5.72701	0.0837092	0.0106447	0.01286	0.0216505	0.0216505
T14A8.1	WBGene00004363	ric-3	0.00282712	0.0409788	0.464705	0.155631	5.15325	0.092181	0.00527444	0.0289704	0.0310571	0.0310571
F20B4.6	WBGene00017625	cgt-2	0.00250199	0.0372143	0.462749	0.153071	5.21832	0.0670384	0.00524363	-0.0017468	0.0299024	0.0299024
D2005.2	WBGene00003746	nlp-8	0.00258058	0.0381383	0.460498	0.1528	5.24893	0.090652	0.00566619	0.028127	0.0293555	0.0293555
K03E6.6	WBGene00003991	pfn-3	0.00149128	0.0245439	0.460236	0.144894	5.95062	0.0887382	0.00262765	0.0288635	0.0189712	0.0288635
F23D12.7	WBGene00009091	F23D12.7	0.00618428	0.0743061	0.45866	0.167526	5.28619	0.0967888	0.00641557	0.0356818	0.0286835	0.0356818
F33D4.2e	WBGene00002173	itr-1	0.00474839	0.0607248	0.457882	0.162161	6.24545	0.0886857	0.0233641	0.00887206	0.0160803	0.0160803
M03A8.1	WBGene00000991	dhs-28	0.00134364	0.0225496	0.457142	0.142568	7.48716	0.0870842	0.000582811	0.0299055	0.00952638	0.0299055
F44A2.3	WBGene00018403	F44A2.3	0.00617736	0.0743014	0.456363	0.166664	4.96159	0.0891675	0.00712285	0.0262364	0.0345426	0.0345426
C25E10.8	WBGene00016097	C25E10.8	0.00803641	0.0903133	0.453202	0.170985	4.86153	0.0827614	0.00731228	0.0191177	0.0365414	0.0365414
R10H1.1	WBGene00019998	R10H1.1	0.00338797	0.0472426	0.452767	0.15452	5.21513	0.0802385	0.00585543	0.0175684	0.0299592	0.0299592
E01G4.1a	WBGene00008444	tbc-14	0.000143834	0.00341316	0.447195	0.117637	6.93343	0.0766013	0.00747691	0.0132808	0.0112721	0.0132808
K03H6.2a	WBGene00019368	K03H6.2	0.0033286	0.0466434	0.446778	0.152191	6.36412	0.0876775	0.00217079	0.0325723	0.0150556	0.0325723
K04F10.4h.1	WBGene00000254	bli-4	0.00313595	0.0446868	0.446341	0.151093	5.66847	0.0815495	0.0118053	0.015424	0.0224382	0.0224382
T14G10.4	WBGene00011774	ttr-54	0.00634082	0.0757867	0.445717	0.163289	5.02062	0.0915951	0.00649636	0.0334987	0.0334376	0.0334987
F08H9.8	WBGene00008596	clec-54	0.00406976	0.0542705	0.445178	0.154968	5.15433	0.0874135	0.00498473	0.0299633	0.031038	0.031038
K08E3.1	WBGene00010661	tyr-2	0.00358659	0.0491391	0.44423	0.15253	5.23145	0.0798325	0.00522991	0.0205583	0.0296683	0.0296683
ZK697.6b	WBGene00001769	gst-21	0.00469498	0.0602276	0.443753	0.156956	5.61867	0.0846627	0.0138128	0.0181718	0.02314	0.02314
M176.4.2	WBGene00010943	M176.4	0.0014369	0.0237814	0.441224	0.138439	6.30017	0.0814019	0.00242152	0.0263265	0.0156012	0.0263265
Y105C5A.24	WBGene00013643	Y105C5A.24	0.00203123	0.0314085	0.439274	0.142361	5.41994	0.0611125	0.00413065	-0.000100665	0.0262695	0.0262695
T23F11.1.1	WBGene00011953	ppm-2	0.00551323	0.0677454	0.438863	0.158125	7.28149	0.0877845	0.0127753	0.0247302	0.0100328	0.0247302
R05C11.3	WBGene00019875	mca-2	0.000501301	0.00992872	0.438481	0.125998	7.16731	0.0767304	0.000781315	0.023032	0.0103829	0.023032
Y54G11A.13a	WBGene00013220	ctl-3	0.00620697	0.0744021	0.438333	0.160172	6.3544	0.0884267	0.00608361	0.0323989	0.0151374	0.0323989
C50B6.7	WBGene00008220	C50B6.7	7.86534e-05	0.00204328	0.435705	0.110348	6.25995	0.0699963	0.00231258	0.0139933	0.0159524	0.0159524
F42G8.4a.2	WBGene00004057	pmk-3	0.0033705	0.0471146	0.434874	0.148332	6.15666	0.0831376	0.00238477	0.0306189	0.0168864	0.0306189
R52.3	WBGene00020075	math-35	0.00728743	0.0840276	0.430735	0.160517	5.02852	0.0592129	0.00535599	-0.000914594	0.0332928	0.0332928
F55A4.8a	WBGene00018860	vpat-1	0.00227751	0.0344381	0.429354	0.140706	5.6249	0.066151	0.00664658	0.0069128	0.0230506	0.0230506
K06H7.7	WBGene00019458	K06H7.7	0.000254891	0.00555077	0.429185	0.11735	6.64797	0.0717851	0.00133606	0.0193206	0.0128918	0.0193206
T08B1.2a	WBGene00006589	tnt-4	0.00105153	0.0183792	0.429036	0.130949	5.84374	0.0597013	0.00553026	6.95685e-05	0.0201911	0.0201911
R02D3.8	WBGene00019825	R02D3.8	1.58904e-06	6.25636e-05	0.42869	0.0893159	6.97217	0.0643937	0.000863646	0.0107129	0.0111024	0.0111024
C35D10.14	WBGene00016450	clec-5	0.00226943	0.0343844	0.427955	0.140198	5.46683	0.0672828	0.00400328	0.0114208	0.0254799	0.0254799
T04D3.8	WBGene00011435	T04D3.8	0.00295523	0.0424037	0.426369	0.143445	5.41314	0.0585592	0.00447786	0.000549598	0.0263868	0.0263868
K01D12.11	WBGene00010470	cdr-4	0.000365908	0.00761148	0.425916	0.119521	5.95504	0.0687338	0.0025049	0.0153856	0.018923	0.018923
W02A2.2	WBGene00001390	far-6	0.00683575	0.0800266	0.425275	0.157233	7.80829	0.0839245	0.000361994	0.0367215	0.00904442	0.0367215
F46H6.1	WBGene00004356	rhi-1	0.00200545	0.0311309	0.423181	0.136977	7.18899	0.07624	0.000713265	0.0274309	0.0103126	0.0274309
C11E4.6	WBGene00007520	C11E4.6	0.00596848	0.0721704	0.42157	0.153326	5.83093	0.081527	0.00320441	0.0320588	0.0203444	0.0320588
C33C12.3b	WBGene00016335	gba-1	0.00710679	0.082515	0.419634	0.155893	5.99745	0.0549946	0.0179858	-0.0152773	0.0184684	0.0184684
K06H7.4	WBGene00001743	grp-1	0.000930186	0.0166156	0.417806	0.126194	8.18622	0.0714784	0.000288599	0.0235987	0.00889011	0.0235987
F53A10.2a	WBGene00018734	F53A10.2	0.00106426	0.0185801	0.416788	0.127343	6.36305	0.0658067	0.00925955	0.00785683	0.0150646	0.0150646
F11A3.1.2	WBGene00008669	acs-14	0.0015501	0.0253599	0.415261	0.131198	6.82832	0.0723881	0.00539814	0.0204214	0.0117949	0.0204214
W05H7.4b	WBGene00021047	zfp-3	0.00620678	0.0744021	0.412337	0.150672	6.33672	0.0702478	0.0187658	0.00528578	0.0152873	0.0152873
Y48A6B.13b	WBGene00012973	spat-2	0.00618317	0.0743061	0.410799	0.150041	6.3771	0.0568465	0.0188215	-0.0110467	0.014947	0.014947
F41G4.2a	WBGene00000294	cas-1	0.000291596	0.00626614	0.410513	0.113318	6.27092	0.0612756	0.00340553	0.00999371	0.015856	0.015856
C56C10.3.1	WBGene00016961	vps-32.1	0.000736761	0.0137317	0.409871	0.121424	6.84418	0.0680908	0.00298091	0.0191349	0.0117103	0.0191349
C46G7.5	WBGene00044502	C46G7.5	0.00785608	0.0888609	0.409177	0.15393	5.37377	0.0786611	0.00446607	0.0310758	0.0270806	0.0310758
C34F6.10	WBGene00007944	C34F6.10	7.17021e-05	0.00187555	0.406699	0.102429	6.7332	0.0622112	0.00104326	0.0146941	0.0123433	0.0146941
C01A2.4	WBGene00007216	C01A2.4	0.000166745	0.00387844	0.406257	0.107912	7.14189	0.0634873	0.000679077	0.0167884	0.0104677	0.0167884
R11D1.11	WBGene00000984	dhs-21	0.000235758	0.00521584	0.405672	0.110319	6.24388	0.0619142	0.00216131	0.0135179	0.0160942	0.0160942
F07F6.8	WBGene00017220	F07F6.8	2.36748e-06	8.9645e-05	0.40391	0.0855883	7.21856	0.0511931	0.000768492	0.00204411	0.0102195	0.0102195
ZC449.5	WBGene00022615	ZC449.5	0.00707049	0.0821354	0.402841	0.14956	6.43151	0.0755263	0.0016577	0.0318947	0.0145007	0.0318947
C27H6.4a	WBGene00007786	rmd-2	0.00410207	0.0544637	0.401889	0.140021	6.64622	0.0719814	0.00718356	0.0222253	0.0129036	0.0222253
Y69E1A.5.1	WBGene00013477	Y69E1A.5	0.000588817	0.011375	0.40157	0.116847	6.04106	0.062465	0.00246379	0.0151455	0.0180161	0.0180161
D1086.10a	WBGene00044080	D1086.10	3.43285e-05	0.000970452	0.401476	0.0969123	7.75259	0.0596252	0.000709128	0.0133789	0.00910167	0.0133789
W01B11.6	WBGene00020917	W01B11.6	0.00518057	0.0645096	0.398211	0.142443	5.70239	0.0719195	0.00408512	0.0263498	0.0219769	0.0263498
ZC168.1	WBGene00003568	ncx-3	0.00495963	0.0624952	0.397425	0.14145	6.55655	0.0713937	0.00154038	0.0284718	0.0135358	0.0284718
D2089.5	WBGene00001522	gbh-1	0.000513955	0.0101352	0.396827	0.114248	6.10261	0.0582114	0.00217647	0.0115358	0.0174025	0.0174025
ZC21.3b	WBGene00022505	ZC21.3	0.00888645	0.097837	0.393805	0.150514	5.60142	0.0737101	0.00453898	0.0294429	0.0233902	0.0294429
Y40H7A.10	WBGene00012747	Y40H7A.10	2.23529e-06	8.53496e-05	0.391698	0.0827957	7.41142	0.0496542	0.000588052	0.00394446	0.00969463	0.00969463
F59B1.2	WBGene00019097	F59B1.2	4.38297e-06	0.000154401	0.390583	0.0850509	7.26532	0.0462687	0.000771129	-0.000143417	0.0100794	0.0100794
B0244.2	WBGene00002048	ida-1	9.53089e-05	0.0023887	0.390347	0.100032	6.56488	0.0550783	0.0015346	0.0101743	0.0134749	0.0134749
F32E10.2.2	WBGene00017990	cec-4	0.00820697	0.0915968	0.39032	0.147656	6.48026	0.0611282	0.0185897	0.000689465	0.0141138	0.0141138
Y47H9C.4a	WBGene00000415	ced-1	0.000883939	0.0159396	0.389896	0.117259	7.0307	0.0621053	0.00506125	0.0155633	0.0108687	0.0155633
ZK6.7a.1	WBGene00022642	lipl-5	9.94818e-05	0.00247964	0.388251	0.09976	8.14432	0.0571641	0.000164001	0.0147641	0.00888746	0.0147641
ZK6.7c.1	WBGene00022642	lipl-5	9.94818e-05	0.00247964	0.388251	0.09976	8.14432	0.0571641	0.000164001	0.0147641	0.00888746	0.0147641
K08H2.8	WBGene00003626	nhr-32	0.00407568	0.0542717	0.386605	0.1346	5.60676	0.0489927	0.00386347	0.00132856	0.0233124	0.0233124
T02C12.1.1	WBGene00002038	hum-5	3.61716e-06	0.000130868	0.386172	0.0833661	7.37678	0.0525105	0.000646228	0.00906849	0.00977862	0.00977862
F20D6.11	WBGene00017640	F20D6.11	0.000704909	0.0132575	0.384731	0.113568	6.11545	0.0490588	0.00206852	0.00374822	0.0172781	0.0172781
Y92H12A.2b	WBGene00022358	Y92H12A.2	0.00261727	0.038576	0.384378	0.127724	5.96778	0.0560567	0.00568524	0.00898076	0.0187849	0.0187849
Y75B8A.4	WBGene00013541	lonp-2	0.00338143	0.0471804	0.384347	0.131143	5.68936	0.0581468	0.00364513	0.0136423	0.0221525	0.0221525
T03E6.7a	WBGene00000776	cpl-1	0.00077551	0.0143017	0.381478	0.113488	10.4661	0.0539698	2.40051e-05	0.0128663	0.0192953	0.0192953
R11D1.10a	WBGene00011248	R11D1.10	0.000174016	0.00402038	0.380817	0.101442	6.59121	0.0496368	0.00215067	0.00551229	0.0132851	0.0132851
ZC373.4	WBGene00013869	mlck-1	0.00772143	0.0875955	0.379901	0.142605	5.96518	0.0677006	0.00289894	0.0276052	0.0188129	0.0276052
ZK632.3.1	WBGene00014012	riok-3	0.0075001	0.0858982	0.377032	0.141011	7.04872	0.0486166	0.0190256	-0.0115622	0.0108003	0.0108003
D1007.14	WBGene00004113	pqn-24	0.00017031	0.00394678	0.374418	0.0995946	6.56378	0.0489518	0.00139574	0.00722325	0.0134829	0.0134829
W02A2.1a.1	WBGene00001394	fat-2	2.40462e-05	0.000701564	0.370058	0.0876174	9.40158	0.0473221	0.000186381	0.0076125	0.0113288	0.0113288
F47A4.5	WBGene00009801	ipla-2	8.44825e-05	0.0021675	0.369971	0.0941088	6.96767	0.0516914	0.00109673	0.012188	0.0111214	0.012188
K08E3.7a.1	WBGene00003967	pdr-1	0.00501589	0.0630296	0.369563	0.131704	6.75774	0.0539061	0.0138237	0.00234272	0.0121952	0.0121952
Y66D12A.13	WBGene00013439	Y66D12A.13	0.00916673	0.0998599	0.366815	0.14077	5.49556	0.0489783	0.00471188	0.00605338	0.0250125	0.0250125
F28H7.3	WBGene00009237	F28H7.3	0.000315566	0.00670526	0.366569	0.101763	7.98986	0.0527388	0.000316032	0.0152176	0.00892007	0.0152176
W03D2.6	WBGene00020981	W03D2.6	0.00408443	0.0543046	0.364268	0.126853	5.76524	0.0519508	0.0029808	0.0121986	0.0211569	0.0211569
C48E7.1	WBGene00016749	C48E7.1	0.000293029	0.00627916	0.362995	0.100236	6.55575	0.050268	0.00152926	0.0118938	0.0135417	0.0135417
Y8A9A.2	WBGene00021171	Y8A9A.2	0.00488913	0.0619499	0.362539	0.128823	5.74717	0.0585323	0.00350463	0.0203728	0.0213883	0.0213883
C03E10.5	WBGene00007282	clec-223	0.0013169	0.0221335	0.362091	0.112721	7.28884	0.0545801	0.000766043	0.018293	0.010012	0.018293
C25E10.10	WBGene00016099	C25E10.10	0.00827265	0.0921491	0.361872	0.137035	5.52851	0.0441067	0.00367658	0.0023501	0.0244911	0.0244911
E04A4.4b.1	WBGene00001983	hoe-1	0.00501448	0.0630296	0.359034	0.127947	7.50576	0.0460377	0.0150675	-0.00585978	0.00948829	0.00948829
Y44A6C.1	WBGene00012850	Y44A6C.1	0.00665194	0.078475	0.354151	0.130501	5.68044	0.0438032	0.00327179	0.00444857	0.0222739	0.0222739
ZK945.1	WBGene00014164	lact-2	0.00321927	0.0455886	0.352217	0.119558	7.06277	0.05437	0.000966194	0.0204751	0.010748	0.0204751
R08E5.2	WBGene00019962	cysl-3	0.000163301	0.00380373	0.351065	0.0931227	6.79657	0.0442775	0.00103749	0.00809186	0.0119703	0.0119703
T14F9.3.3	WBGene00020509	hex-1	0.00587104	0.0713714	0.350609	0.127268	6.53346	0.0563145	0.0101003	0.0141953	0.0137071	0.0141953
T19C3.4	WBGene00020562	T19C3.4	0.00348076	0.0481188	0.347595	0.118968	6.58522	0.0532309	0.0013135	0.0199167	0.0133279	0.0199167
F32B6.9	WBGene00009323	best-13	0.00660611	0.0781932	0.346504	0.127575	5.77525	0.0482727	0.00338306	0.0119334	0.0210302	0.0210302
C09B8.7b	WBGene00003911	pak-1	0.00427896	0.0559634	0.345076	0.12079	6.6363	0.0486612	0.00891447	0.00725797	0.0129708	0.0129708
F26A3.4	WBGene00009142	F26A3.4	0.00660744	0.0781932	0.340132	0.125232	6.58752	0.0535266	0.00127994	0.0222447	0.0133115	0.0222447
W04A4.2	WBGene00012231	W04A4.2	0.0042133	0.0554783	0.339468	0.118623	5.99906	0.0412343	0.00265582	0.00567263	0.0184514	0.0184514
T27C4.1.2	WBGene00020854	T27C4.1	0.00785641	0.0888609	0.3394	0.127681	5.76443	0.0523624	0.00328672	0.018969	0.0211671	0.0211671
C01B10.11	WBGene00044294	C01B10.11	0.00122788	0.0208528	0.338285	0.104657	6.41133	0.0369549	0.00176506	0.00151486	0.0146645	0.0146645
C42D8.3	WBGene00006862	pnk-4	0.00222386	0.033784	0.337828	0.110452	6.21415	0.0459239	0.00194062	0.0126664	0.016359	0.016359
B0304.4	WBGene00015136	B0304.4	0.00706511	0.0821147	0.337586	0.125322	5.80401	0.0426015	0.00288625	0.00762889	0.020672	0.020672
F10C1.2b	WBGene00002053	ifb-1	0.000468157	0.00937014	0.336785	0.0962699	7.44464	0.04444	0.00428359	0.00873233	0.00961824	0.00961824
T08G11.4a.1	WBGene00011631	T08G11.4	0.00271938	0.0396844	0.33603	0.112092	7.31923	0.039697	0.00891899	-0.00164137	0.00992807	0.00992807
T08G2.3.1	WBGene00020366	acdh-10	2.0745e-05	0.000616291	0.335401	0.0787933	7.98924	0.0395704	0.000392227	0.00688572	0.00892034	0.00892034
T22B11.4a	WBGene00020678	T22B11.4	0.00482719	0.0613358	0.3343	0.118616	6.42203	0.0504106	0.00198709	0.0191174	0.0145774	0.0191174
F21F8.7	WBGene00000219	asp-6	0.00580585	0.070768	0.332773	0.120633	10.2464	0.0506844	4.21657e-05	0.0217865	0.0169519	0.0217865
C51E3.7a	WBGene00001172	egl-3	0.000585503	0.0113302	0.331129	0.0963076	7.18203	0.043378	0.0035778	0.00952732	0.0103349	0.0103349
VC5.3a	WBGene00003786	npa-1	0.00899393	0.098591	0.329884	0.126282	8.49061	0.0517835	0.000289551	0.0236311	0.00905805	0.0236311
AC3.2	WBGene00007070	ugt-49	0.00343802	0.0477941	0.329377	0.112585	6.1843	0.035045	0.00238289	0.000739844	0.0166301	0.0166301
R11A5.4a.1	WBGene00011232	pck-2	0.000120883	0.00294217	0.32668	0.0849772	8.89251	0.0365012	0.00113008	0.00447646	0.00970162	0.00970162
K07D4.7a	WBGene00019487	ephx-1	0.00345999	0.0479531	0.326511	0.111681	6.46615	0.0357531	0.00448445	0.000228411	0.0142244	0.0142244
B0035.13.1	WBGene00007112	B0035.13	0.000867381	0.0157032	0.325551	0.0977528	7.24939	0.0389538	0.00420724	0.00474135	0.0101262	0.0101262
F32G8.4	WBGene00009340	best-14	0.00165071	0.0266799	0.32483	0.103226	6.46281	0.0413411	0.00173252	0.0103758	0.0142508	0.0142508
F56D5.6a	WBGene00010150	F56D5.6	0.00721021	0.083333	0.323716	0.120476	6.11836	0.0461553	0.00452161	0.0138755	0.0172501	0.0172501
F38B7.1b	WBGene00009532	ccch-1	0.00615453	0.0741051	0.322862	0.117857	7.18475	0.0479405	0.00100108	0.0198345	0.0103261	0.0198345
ZK783.2	WBGene00022817	upp-1	0.0038126	0.0515527	0.322094	0.111325	7.64041	0.0459953	0.000497862	0.0180921	0.00925004	0.0180921
W06B11.3	WBGene00021060	dct-11	0.00335739	0.0469601	0.321624	0.109658	6.23939	0.0323195	0.00190339	-0.000294742	0.016134	0.016134
T02C5.1b	WBGene00020158	T02C5.1	0.0015887	0.0258678	0.319401	0.101141	6.91099	0.0344938	0.00396812	0.000892822	0.0113761	0.0113761
K03E6.7	WBGene00019365	rei-2	0.00440941	0.0572093	0.317753	0.111599	6.1976	0.0413007	0.00217277	0.0115905	0.0165087	0.0165087
C32D5.9	WBGene00002980	lgg-1	0.00277671	0.0403252	0.315512	0.105472	9.44463	0.0432136	8.2541e-05	0.016604	0.011516	0.016604
R11D1.1b	WBGene00011242	R11D1.1	0.000838324	0.0152378	0.3147	0.0942265	7.18146	0.0344534	0.00298119	0.00294709	0.0103368	0.0103368
K07F5.12	WBGene00010637	K07F5.12	0.00151154	0.0248362	0.314351	0.0990874	6.57291	0.0319432	0.00131094	0.00156191	0.0134165	0.0134165
F21F3.6	WBGene00017675	F21F3.6	0.000998769	0.017633	0.310261	0.0942791	8.97995	0.0395447	0.000113405	0.0132194	0.0099112	0.0132194
F40F4.7	WBGene00018238	F40F4.7	0.00108972	0.0189448	0.309611	0.0947903	7.12187	0.03954	0.000737369	0.0127404	0.0105362	0.0127404
C15H9.4	WBGene00015800	C15H9.4	0.000542561	0.0105983	0.308868	0.0892987	6.99982	0.0380453	0.00097242	0.0108095	0.010989	0.010989
W06B4.2	WBGene00021057	W06B4.2	0.00384912	0.0518925	0.307214	0.106293	6.35738	0.0310254	0.00183491	0.00155423	0.0151122	0.0151122
R09F10.1	WBGene00019986	R09F10.1	0.00672641	0.0790666	0.307194	0.113352	6.13012	0.032062	0.00213568	0.00255368	0.0171373	0.0171373
F53B1.8a	WBGene00018739	F53B1.8	0.00852733	0.0944773	0.300726	0.114325	6.50873	0.0305509	0.00571129	-0.00143614	0.013894	0.013894
C50F4.7	WBGene00001911	his-37	0.00199718	0.0310238	0.298304	0.096518	6.66603	0.0318468	0.0012024	0.00523668	0.0127712	0.0127712
C40H1.5	WBGene00008040	ttr-5	0.00628087	0.0752283	0.29761	0.108905	6.27242	0.0336177	0.00194761	0.00686011	0.0158429	0.0158429
W02D9.7	WBGene00012213	W02D9.7	0.00292221	0.0420358	0.295439	0.0992802	7.52196	0.0380131	0.000573115	0.0142117	0.00945613	0.0142117
B0001.4b	WBGene00007089	B0001.4	0.0051362	0.0640814	0.295192	0.105487	7.35966	0.0394946	0.00592377	0.0107676	0.0098218	0.0107676
F57B10.9	WBGene00019006	spg-20	0.00629431	0.0752704	0.291208	0.10659	6.33831	0.0311449	0.00176836	0.00536204	0.0152737	0.0152737
D1086.11b.1	WBGene00044081	D1086.11	0.00425049	0.055687	0.290216	0.101512	6.98637	0.0342523	0.00441356	0.00681727	0.0110433	0.0110433
Y51A2D.10a	WBGene00013078	ttr-25	0.00519813	0.0646415	0.287854	0.103008	6.45338	0.0345057	0.00159035	0.0104693	0.0143255	0.0143255
F52A8.6a	WBGene00009919	kbrl-1	0.00792391	0.0894023	0.284224	0.107041	7.01103	0.0379843	0.00545816	0.0117284	0.0109448	0.0117284
ZK1248.16.1	WBGene00002268	lec-5	0.000361465	0.00753283	0.28294	0.0793276	8.30175	0.0241449	0.000516398	-0.000355879	0.00892291	0.00892291
T21F4.1	WBGene00020658	T21F4.1	0.00401209	0.0537393	0.281733	0.0979187	6.6184	0.0338164	0.00128809	0.0112175	0.013094	0.013094
ZK40.1.1	WBGene00022646	acl-9	0.00862335	0.0953554	0.27487	0.104647	7.85677	0.0324233	0.00742457	0.00477187	0.00900202	0.00900202
Y24D9A.1a.2	WBGene00021281	ell-1	0.00896736	0.098442	0.269271	0.103039	7.60023	0.0344924	0.00120733	0.0147182	0.00931426	0.0147182
Y67H2A.4d	WBGene00013462	micu-1	0.00353707	0.048607	0.268285	0.0919811	7.22268	0.0232446	0.00248395	-0.0004196	0.0102068	0.0102068
H06H21.8b	WBGene00019164	H06H21.8	0.00657661	0.0780313	0.2658	0.0978086	6.69339	0.0241617	0.0017568	0.00195163	0.012593	0.012593
C32E8.3	WBGene00016321	tppp-1	0.00193484	0.0302511	0.264236	0.0852359	7.22532	0.0251738	0.00069899	0.00458547	0.0101988	0.0101988
F21F8.3.1	WBGene00000218	asp-5	0.00154455	0.0252873	0.262003	0.0827504	9.07053	0.0232517	0.000114466	0.00320817	0.010157	0.010157
Y45F3A.3a.1	WBGene00012860	acdh-11	0.00812196	0.0910051	0.261356	0.0987381	7.16432	0.0267944	0.00423109	0.00364688	0.0103927	0.0103927
H22K11.1	WBGene00000216	asp-3	0.00908832	0.099126	0.260222	0.0997512	10.0063	0.026335	5.25657e-05	0.00747279	0.0148729	0.0148729
F54C1.7.1	WBGene00003934	pat-10	0.0015766	0.0257379	0.259812	0.0822139	8.57217	0.0245019	0.000990258	0.00432367	0.00914843	0.00914843
ZK105.1	WBGene00022653	ZK105.1	0.0014203	0.0235409	0.254538	0.07978	7.761	0.0203211	0.000454894	0.000650488	0.00909238	0.00909238
M28.6	WBGene00010897	lact-3	0.00757186	0.0865836	0.25452	0.0953049	6.80244	0.0303338	0.00114319	0.0124813	0.0119372	0.0124813
ZK20.3.1	WBGene00013924	rad-23	0.00471505	0.060451	0.253515	0.0897117	7.8844	0.0252194	0.0030914	0.00433176	0.00898087	0.00898087
T07C12.7	WBGene00011571	ttr-46	0.00148256	0.0244305	0.252076	0.0793172	7.79188	0.0223614	0.0003765	0.00374692	0.00906032	0.00906032
C18B12.4	WBGene00007666	C18B12.4	0.00480021	0.0610898	0.247309	0.0876939	7.06128	0.0260165	0.000781846	0.00880305	0.0107535	0.0107535
F17E9.4	WBGene00017541	F17E9.4	0.00291644	0.0420059	0.244327	0.0820877	7.48907	0.0251038	0.000585162	0.00840873	0.00952241	0.00952241
C31E10.7.1	WBGene00007848	cytb-5.1	0.00397296	0.0533094	0.24322	0.0844427	7.27169	0.0235113	0.000634936	0.0065707	0.0100609	0.0100609
C06A8.3	WBGene00015514	nlp-77	0.0080175	0.0901589	0.239937	0.0904966	9.58958	0.0267832	7.2303e-05	0.0118181	0.0122122	0.0122122
R17.2	WBGene00011268	pde-12	0.0044311	0.0573924	0.229635	0.0806948	7.62428	0.0183345	0.000492369	0.00265116	0.00927512	0.00927512
T21C12.2	WBGene00001993	hpd-1	0.00407082	0.0542705	0.228245	0.0794554	7.80188	0.0213078	0.000419204	0.00667957	0.00905054	0.00905054
C17G10.8	WBGene00000970	dhs-6	0.00734789	0.0845379	0.213198	0.0795321	7.74849	0.0196066	0.000381751	0.00708149	0.00910628	0.00910628
C33H5.12a	WBGene00004703	rsp-6	0.00891473	0.0979588	-0.205323	0.0785082	8.4549	0.0136092	0.000220689	0.000981773	0.00902462	0.00902462
Y39E4B.2	WBGene00012715	snpc-1.2	0.00890325	0.0978799	-0.20709	0.0791705	7.86273	0.0174757	0.000404684	0.00535758	0.00899727	0.00899727
T26A8.4	WBGene00020827	T26A8.4	0.00799014	0.0899712	-0.207492	0.0782255	8.1653	0.0151267	0.00029066	0.00247294	0.00888817	0.00888817
Y43E12A.1	WBGene00000866	cyb-2.1	0.00796832	0.0897698	-0.207738	0.078291	8.38086	0.015455	0.000227151	0.00290847	0.00896708	0.00896708
Y105E8A.9	WBGene00000158	apg-1	0.00818318	0.0914635	-0.208093	0.0786916	7.92124	0.0194957	0.000332498	0.00779859	0.00895605	0.00895605
C34B2.8	WBGene00016393	C34B2.8	0.00733641	0.0844485	-0.209733	0.0782243	8.2419	0.0185729	0.000277316	0.00644339	0.00890124	0.00890124
K02B2.3	WBGene00019296	mcu-1	0.00898568	0.0985777	-0.210668	0.0806355	7.64008	0.014269	0.000502582	0.000690707	0.00925055	0.00925055
ZK792.6	WBGene00002335	let-60	0.00751566	0.0860332	-0.210807	0.0788627	7.96856	0.0207951	0.000396415	0.00893258	0.00892982	0.00893258
W02D3.4	WBGene00020933	W02D3.4	0.0078638	0.0889004	-0.212437	0.0799277	7.71824	0.015302	0.000440376	0.00176358	0.00914227	0.00914227
F54C8.2	WBGene00010036	cpar-1	0.00831581	0.0925174	-0.213555	0.0809237	7.56276	0.0177078	0.000443581	0.00458899	0.0093794	0.0093794
M04B2.1	WBGene00003218	mep-1	0.00824929	0.0920241	-0.214814	0.081317	8.92019	0.0164524	0.000153567	0.00310752	0.00976511	0.00976511
F15B9.4	WBGene00008848	inft-2	0.00694483	0.0810064	-0.214958	0.0796295	7.81641	0.0186015	0.00047443	0.00544985	0.00903685	0.00903685
Y54G2A.23	WBGene00021888	manf-1	0.00616365	0.0741757	-0.215044	0.0785133	8.03262	0.0187349	0.00034216	0.00573497	0.00890436	0.00890436
R07E5.3	WBGene00011111	snfc-5	0.00694416	0.0810064	-0.215758	0.079925	7.73349	0.0188993	0.0004583	0.00570889	0.00912372	0.00912372
C04A2.7b.1	WBGene00001023	dnj-5	0.00724176	0.0836127	-0.216397	0.0805792	8.47222	0.0181069	0.000699146	0.00437408	0.00904037	0.00904037
R06A4.9a	WBGene00011051	pfs-2	0.00682601	0.0799894	-0.216658	0.0800888	7.80263	0.0203122	0.000571519	0.00721601	0.00904982	0.00904982
VF13D12L.1	WBGene00012148	inos-1	0.00612847	0.0738695	-0.216953	0.0791562	7.88492	0.0204008	0.000418067	0.0074321	0.00898049	0.00898049
H17B01.1a	WBGene00019207	fgt-1	0.00722217	0.0834289	-0.219313	0.0816374	7.56572	0.0187064	0.000622935	0.00472327	0.00937407	0.00937407
Y48A6B.3	WBGene00012964	Y48A6B.3	0.00711613	0.0825812	-0.219333	0.0814952	7.55328	0.0184921	0.000565499	0.00450955	0.00939669	0.00939669
R10E11.8.1	WBGene00006910	vha-1	0.00495378	0.062456	-0.220919	0.0786183	8.20578	0.0211337	0.000378212	0.00773699	0.00889303	0.00889303
M4.1b	WBGene00019766	M4.1	0.00763822	0.087042	-0.221582	0.0830623	7.63224	0.0191696	0.00108639	0.00446366	0.00926262	0.00926262
F56D1.2	WBGene00018960	ilcr-2	0.00561265	0.0687074	-0.222409	0.0803038	7.70227	0.0208879	0.000510455	0.00704982	0.00916259	0.00916259
F52F12.4.1	WBGene00009937	lsl-1	0.00705346	0.0820553	-0.222884	0.082724	7.46687	0.0220832	0.000695488	0.00827955	0.0095694	0.0095694
F12F6.6	WBGene00004755	sec-24.1	0.00506401	0.063564	-0.223175	0.0796219	8.7109	0.0179154	0.000161283	0.00355536	0.00934818	0.00934818
F45E12.1b	WBGene00018474	cnep-1	0.00511056	0.0639368	-0.223295	0.0797489	7.74326	0.0179827	0.000427561	0.00335305	0.00911227	0.00911227
Y18D10A.11	WBGene00012481	Y18D10A.11	0.0047789	0.0609605	-0.224671	0.0796261	8.71216	0.020794	0.000160199	0.00690344	0.00935027	0.00935027
Y54F10AR.1	WBGene00021854	Y54F10AR.1	0.00532957	0.06588	-0.225271	0.0808462	7.64082	0.0197483	0.000554762	0.00510058	0.00924941	0.00924941
Y111B2A.12a	WBGene00013735	Y111B2A.12	0.00840074	0.0933475	-0.225849	0.085694	7.27995	0.0203356	0.000977974	0.00531371	0.0100372	0.0100372
T12D8.1	WBGene00011729	set-16	0.00362137	0.0494002	-0.227221	0.0780992	8.33557	0.0216094	0.000209616	0.00744117	0.00893962	0.00893962
W01G7.4	WBGene00012188	W01G7.4	0.00718134	0.0831518	-0.2287	0.0850717	7.22517	0.0178745	0.000656559	0.00207272	0.0101992	0.0101992
Y55F3AM.3a	WBGene00021921	rbm-39	0.00449885	0.0581706	-0.228784	0.0805328	7.89618	0.0204895	0.000755787	0.00522769	0.00897251	0.00897251
K12H4.7a.1	WBGene00019682	K12H4.7	0.00651284	0.0775171	-0.230496	0.084717	8.78359	0.0245509	0.000262093	0.0105034	0.00947677	0.0105034
C16A11.4a	WBGene00015817	C16A11.4	0.00790965	0.0892944	-0.232393	0.0875005	7.34733	0.0230094	0.00163097	0.00687834	0.00985355	0.00985355
Y37E3.10a	WBGene00021351	eif-2alpha	0.00328396	0.0462458	-0.232441	0.0790664	8.5732	0.0179695	0.000227538	0.00197353	0.00914969	0.00914969
F25B5.3b	WBGene00017775	F25B5.3	0.00301551	0.0431597	-0.233036	0.0785651	8.30319	0.0190817	0.000335162	0.00315227	0.00892355	0.00892355
Y73B6BL.32	WBGene00003082	lsm-8	0.00507269	0.063638	-0.233281	0.0832439	7.35691	0.019638	0.000565496	0.00357443	0.00982883	0.00982883
R09B3.2	WBGene00011155	rbm-3.1	0.0048625	0.0616811	-0.233597	0.0829532	9.08877	0.0245876	0.000111732	0.01016	0.0102101	0.0102101
F49E11.1n.3	WBGene00003150	mbk-2	0.00417362	0.0550948	-0.233666	0.0815665	8.82387	0.0227354	0.000424285	0.00752005	0.00955535	0.00955535
T19B4.2.2	WBGene00003793	npp-7	0.00683621	0.0800266	-0.233947	0.0864958	9.33319	0.0210693	0.000173366	0.00563907	0.0110489	0.0110489
F23H12.2	WBGene00009092	tomm-20	0.00417381	0.0550948	-0.234052	0.0817017	7.52652	0.0192163	0.000565473	0.0029123	0.00944727	0.00944727
Y116A8C.32a	WBGene00013808	sfa-1	0.00585972	0.0712718	-0.23466	0.0851597	7.76711	0.025213	0.00179247	0.00907428	0.0090858	0.0090858
F29B9.6.1	WBGene00006706	ubc-9	0.00565072	0.0690991	-0.23471	0.0848129	8.87244	0.022356	0.00113262	0.00615397	0.00965723	0.00965723
F39B2.10.2	WBGene00001030	dnj-12	0.00389786	0.0523943	-0.236584	0.0819674	8.99024	0.0203058	0.000140361	0.00425244	0.00993763	0.00993763
Y56A3A.21.1	WBGene00013238	trap-4	0.00372134	0.0504086	-0.237433	0.0818489	8.98578	0.0222218	0.000122741	0.0065142	0.00992613	0.00992613
T22D1.4	WBGene00020683	ribo-1	0.00657011	0.0780066	-0.237672	0.0874475	9.41559	0.0189574	8.18067e-05	0.00243193	0.0113888	0.0113888
F43D9.2	WBGene00004283	rab-33	0.00887753	0.097786	-0.238409	0.0911095	6.90442	0.018258	0.00104404	0.00046382	0.0114074	0.0114074
R10E11.2	WBGene00006911	vha-2	0.00904031	0.0988613	-0.239201	0.0916295	9.65007	0.0259918	5.93658e-05	0.0109739	0.0125346	0.0125346
Y54E2A.11a.2	WBGene00001225	eif-3.B	0.00361797	0.0494002	-0.241093	0.0828589	8.69257	0.0220367	0.000980011	0.00476863	0.00931839	0.00931839
T26C5.3a	WBGene00012033	T26C5.3	0.00658152	0.0780488	-0.24117	0.0887531	7.58662	0.0269014	0.0009241	0.0108916	0.00933732	0.0108916
H34C03.2a	WBGene00019259	H34C03.2	0.0032376	0.0457432	-0.241631	0.0820692	8.94524	0.0240018	0.00027822	0.00782955	0.00982482	0.00982482
F45H11.3	WBGene00009744	hpo-35	0.00290332	0.04187	-0.242411	0.0814063	7.5844	0.0205236	0.000599325	0.00301893	0.00934115	0.00934115
PAR2.4a.2	WBGene00003253	mig-22	0.00520363	0.0646745	-0.242998	0.0869668	8.12513	0.0266403	0.00245697	0.00870037	0.00888788	0.00888788
Y37E3.9	WBGene00004014	phb-1	0.00218523	0.0332927	-0.243377	0.0794355	8.67842	0.0235636	0.0001689	0.00707344	0.0092961	0.0092961
R08E3.1a	WBGene00019957	R08E3.1	0.00287954	0.0415797	-0.243981	0.0818641	7.91781	0.0185549	0.00109441	-0.000223225	0.0089582	0.0089582
C09G4.1b	WBGene00002043	hyl-1	0.00675235	0.0793305	-0.24412	0.0901204	7.24184	0.0191931	0.00203381	-0.000390278	0.0101487	0.0101487
F28B3.8	WBGene00002075	imb-1	0.00179767	0.0285682	-0.244741	0.0783981	8.4064	0.0193176	0.000234254	0.00145093	0.00898515	0.00898515
F52E1.14	WBGene00044696	F52E1.14	0.00180314	0.0286351	-0.24493	0.0784813	8.04988	0.0210134	0.000339494	0.00343065	0.00889947	0.00889947
C09D4.4c	WBGene00015635	C09D4.4	0.00593562	0.0719643	-0.245337	0.0891707	7.42313	0.0203122	0.00225988	0.00055906	0.00966724	0.00966724
C14B1.7	WBGene00007578	C14B1.7	0.00183016	0.0289631	-0.24545	0.0787585	7.9552	0.0227391	0.00036778	0.00546389	0.00893658	0.00893658
T10C6.7	WBGene00011689	T10C6.7	0.0036227	0.0494002	-0.246469	0.0847185	7.51372	0.0268368	0.00104873	0.0097171	0.00947237	0.0097171
T21B10.4	WBGene00011886	T21B10.4	0.00216149	0.0330718	-0.2471	0.0805648	7.66823	0.021099	0.00052703	0.00294987	0.009209	0.009209
T02E1.3a	WBGene00011376	gla-3	0.0015891	0.0258678	-0.247274	0.0783034	8.27933	0.0245541	0.000283516	0.00747996	0.00891361	0.00891361
T22D1.3a	WBGene00020682	T22D1.3	0.0021136	0.0324555	-0.248331	0.08079	7.95573	0.0263104	0.000854238	0.00890809	0.00893631	0.00893631
H25P06.1	WBGene00010416	hxk-2	0.00318928	0.0453049	-0.248619	0.0843095	7.29429	0.0244481	0.000665455	0.00671547	0.00999669	0.00999669
B0414.5	WBGene00000772	cpb-3	0.00168072	0.0270631	-0.248827	0.079206	8.61696	0.0240397	0.000203894	0.00662756	0.00920649	0.00920649
Y69A2AR.18a.1	WBGene00022089	Y69A2AR.18	0.00425615	0.0557291	-0.249041	0.0871223	9.38527	0.027262	0.000125281	0.0106941	0.0112602	0.0112602
T16G12.3	WBGene00011804	T16G12.3	0.00309096	0.0441009	-0.249463	0.0843196	7.30068	0.0268947	0.000685807	0.00959559	0.00997888	0.00997888
K02F3.2a	WBGene00019326	K02F3.2	0.00769938	0.0874429	-0.249487	0.0936171	7.07911	0.0281296	0.00245823	0.00936231	0.010688	0.010688
C05G5.4.1	WBGene00007350	sucl-1	0.0018948	0.0297379	-0.24969	0.0803834	7.64551	0.0237626	0.000449922	0.00587379	0.00924231	0.00924231
LLC1.2a	WBGene00010793	LLC1.2	0.00163187	0.0264316	-0.250498	0.0795193	7.78244	0.0239509	0.000415173	0.00599255	0.00906982	0.00906982
D1007.5a	WBGene00017003	D1007.5	0.00323307	0.0457432	-0.251251	0.0853241	7.35474	0.0272546	0.0010859	0.00930972	0.0098344	0.0098344
F27D4.7	WBGene00009191	F27D4.7	0.00628991	0.0752574	-0.251786	0.0921528	6.83748	0.0246379	0.000992377	0.00603139	0.0117458	0.0117458
Y69A2AR.2a	WBGene00004367	ric-8	0.00529213	0.0655239	-0.252056	0.090385	6.96075	0.0254415	0.00110314	0.00687415	0.011151	0.011151
F56D2.6a	WBGene00018967	ddx-15	0.00146969	0.0242712	-0.252838	0.0794936	8.3263	0.0267611	0.0003013	0.00917755	0.00893472	0.00917755
K10C3.4a	WBGene00010731	K10C3.4	0.00126494	0.0214024	-0.253096	0.0785081	8.3738	0.023466	0.000282863	0.00502809	0.00896242	0.00896242
F20D12.1b	WBGene00017641	csr-1	0.00282927	0.0409839	-0.253098	0.0847698	9.22296	0.0259368	0.000138339	0.00826073	0.0106405	0.0106405
K04G2.2	WBGene00010561	aho-3	0.00115354	0.0198421	-0.254226	0.0782203	8.22683	0.0233838	0.000280247	0.00471298	0.00889737	0.00889737
W06H12.1	WBGene00012317	ztf-6	0.00178496	0.0284457	-0.255583	0.0818165	7.54097	0.0276296	0.000497217	0.0095437	0.00941964	0.0095437
ZK757.4d	WBGene00014075	dhhc-4	0.00604254	0.0729884	-0.256194	0.0933154	6.99426	0.0219375	0.00205039	0.000758157	0.0110113	0.0110113
C36B1.12a.2	WBGene00007979	imp-1	0.00728877	0.0840276	-0.256523	0.0955978	7.36483	0.0276682	0.0038998	0.00600891	0.00980863	0.00980863
Y55H10A.1	WBGene00021952	vha-19	0.00117752	0.0201807	-0.25694	0.079198	8.61056	0.0271598	0.000210652	0.00898231	0.00919783	0.00919783
R04B5.9	WBGene00011006	ugt-47	0.00714122	0.0827458	-0.257049	0.0955508	6.69784	0.0303695	0.00113045	0.0120535	0.0125645	0.0125645
F18A11.1.1	WBGene00004242	puf-6	0.00179281	0.0285308	-0.257793	0.0825581	8.34513	0.0243783	0.00127882	0.00427253	0.00894493	0.00894493
M03F4.7a.2	WBGene00019760	calu-1	0.00104535	0.0183134	-0.259166	0.0790616	8.58999	0.0229994	0.000205303	0.00335627	0.0091708	0.0091708
T09B9.1	WBGene00011642	T09B9.1	0.00596216	0.0721704	-0.259539	0.0943829	6.75868	0.0306807	0.00117254	0.0119181	0.0121897	0.0121897
Y17G9B.9	WBGene00003216	memi-1	0.00150722	0.0247831	-0.259644	0.0818218	7.49426	0.0246085	0.000530526	0.0049494	0.00951169	0.00951169
Y71F9AL.9	WBGene00022114	Y71F9AL.9	0.00167112	0.0269524	-0.259845	0.0826688	9.05918	0.024532	0.000126645	0.00521871	0.0101246	0.0101246
ZK353.1b	WBGene00022697	cyy-1	0.00497985	0.0627152	-0.26025	0.0926707	7.3563	0.0212317	0.0030514	-0.0019106	0.00983039	0.00983039
C26E6.3	WBGene00016139	ntl-9	0.00108262	0.0188357	-0.26085	0.0798165	7.77609	0.0205211	0.000479656	-0.000344349	0.00907634	0.00907634
T24H7.1.1	WBGene00004015	phb-2	0.00110297	0.0191314	-0.261495	0.080143	8.71926	0.0270168	0.000272236	0.0078564	0.00936212	0.00936212
Y45F10D.3b	WBGene00001635	gly-10	0.00907657	0.0991039	-0.261936	0.100391	7.66418	0.0326771	0.0015545	0.013563	0.0092148	0.013563
W03F8.4	WBGene00020994	W03F8.4	0.00083586	0.0152052	-0.263965	0.0790162	7.847	0.0228125	0.000355317	0.00203139	0.00901002	0.00901002
C10H11.10	WBGene00015698	kca-1	0.00218667	0.0332927	-0.263976	0.0861643	8.22996	0.0298141	0.000242548	0.0108939	0.00889812	0.0108939
F42G8.10.1	WBGene00018361	F42G8.10	0.00437143	0.0568786	-0.264485	0.0928005	7.68007	0.03132	0.000938088	0.0119798	0.00919238	0.0119798
R05D11.5	WBGene00011033	R05D11.5	0.00642476	0.0765889	-0.265577	0.0974496	6.65131	0.0269446	0.00137537	0.00585621	0.0128693	0.0128693
F43G6.9	WBGene00009661	patr-1	0.00172742	0.0277229	-0.267133	0.085251	9.27184	0.0267732	8.62879e-05	0.00662023	0.0108153	0.0108153
F53G2.7	WBGene00018769	mnat-1	0.000698043	0.0131393	-0.267756	0.0789761	7.90255	0.0276621	0.000387681	0.00730491	0.00896816	0.00896816
C24F3.1a	WBGene00007696	tram-1	0.00349433	0.0481364	-0.268033	0.0917754	7.50275	0.0305958	0.00313972	0.0081644	0.00949437	0.00949437
Y53H1C.1a	WBGene00000010	aat-9	0.00357671	0.0490627	-0.268421	0.0921375	7.09752	0.0251467	0.0021122	0.00230249	0.0106218	0.0106218
B0336.5b	WBGene00015145	arle-14	0.00475772	0.0607925	-0.269851	0.0955904	6.84473	0.0250531	0.00199885	0.00201008	0.0117074	0.0117074
K04G2.1.2	WBGene00010560	eif-2beta	0.000898269	0.0161451	-0.270088	0.0813373	8.0875	0.027341	0.00103194	0.00578901	0.0088917	0.0088917
F42A8.1	WBGene00009626	F42A8.1	0.00244355	0.0364642	-0.270311	0.0892043	6.97907	0.0262456	0.000862676	0.00454386	0.0110734	0.0110734
F11A5.9	WBGene00008677	F11A5.9	0.00406208	0.0542174	-0.274108	0.0953983	6.71237	0.0265023	0.00117874	0.0037735	0.0124725	0.0124725
Y54F10AL.1a	WBGene00021847	Y54F10AL.1	0.00215599	0.0330174	-0.274263	0.0893989	7.15045	0.0283548	0.00154943	0.00568649	0.0104388	0.0104388
T08D10.2	WBGene00011615	lsd-1	0.00813099	0.0910615	-0.274804	0.103833	6.43917	0.0271266	0.00173306	0.00385622	0.014439	0.014439
H02I12.5	WBGene00010353	memi-3	0.000451989	0.00907848	-0.275563	0.0785593	8.02296	0.0257472	0.000349874	0.00335863	0.00890746	0.00890746
W01B11.3	WBGene00020915	nol-58	0.000932493	0.0166437	-0.276052	0.0833959	9.11949	0.024703	0.000129835	0.00217205	0.0103025	0.0103025
B0280.3.1	WBGene00015101	rpia-1	0.00121376	0.0206748	-0.277316	0.0857071	7.21244	0.0279674	0.000780047	0.0053401	0.0102385	0.0102385
F56C9.7	WBGene00018951	F56C9.7	0.000600305	0.0115772	-0.277351	0.0808256	7.58246	0.03014	0.000454656	0.00837395	0.00934451	0.00934451
C48A7.2a.1	WBGene00016739	pitr-1	0.000559406	0.0108807	-0.278532	0.0807207	8.61333	0.0284928	0.000572185	0.00595122	0.00920157	0.00920157
C46G7.1	WBGene00016721	C46G7.1	0.00669463	0.0787744	-0.278651	0.10276	6.48219	0.027518	0.00174068	0.0035395	0.0140988	0.0140988
C18A11.7b	WBGene00001000	dim-1	0.00414842	0.0548935	-0.279022	0.0973338	8.10267	0.0347246	0.000368022	0.0138428	0.00888968	0.0138428
M28.5	WBGene00010896	M28.5	0.000946292	0.0168504	-0.279933	0.0846734	9.01275	0.0321122	0.000117061	0.0106373	0.00999676	0.0106373
Y54G11A.3	WBGene00013214	Y54G11A.3	0.00318292	0.0452427	-0.280005	0.094933	7.62848	0.0343355	0.000523324	0.0129951	0.00926849	0.0129951
Y47G6A.24a.1	WBGene00021648	mis-12	0.00187424	0.0294966	-0.28004	0.0900605	6.96199	0.0286532	0.00102061	0.0053874	0.0111457	0.0111457
D2024.3	WBGene00001241	elo-3	0.000369444	0.00767101	-0.280916	0.0788867	7.97813	0.0258871	0.000409395	0.00235688	0.00892528	0.00892528
Y67H2A.10c	WBGene00013465	Y67H2A.10	0.00163184	0.0264316	-0.280943	0.0891838	7.43313	0.0280447	0.00228637	0.00317118	0.00964425	0.00964425
Y66H1A.4.2	WBGene00022046	Y66H1A.4	0.000375562	0.00777676	-0.282111	0.0793184	8.01177	0.0281106	0.000525735	0.00476765	0.00891138	0.00891138
Y71F9B.10c	WBGene00004946	sop-3	0.00587757	0.0713745	-0.282322	0.102494	7.66138	0.0365177	0.0040278	0.0117296	0.00921884	0.0117296
F52D1.1	WBGene00018682	aagr-4	0.00438819	0.0569989	-0.283037	0.0993524	6.56173	0.0306631	0.00130848	0.00697917	0.0134979	0.0134979
R144.4a	WBGene00020094	wip-1	0.00468212	0.0600965	-0.283871	0.100374	7.16582	0.0362647	0.00252998	0.0125825	0.0103878	0.0125825
T23D8.4.3	WBGene00001226	eif-3.C	0.00292191	0.0420358	-0.284064	0.0954568	8.83423	0.0351421	0.00155688	0.0121111	0.00957643	0.0121111
F56D12.1a.2	WBGene00000112	alh-6	0.0018624	0.029363	-0.284128	0.09132	7.14955	0.0340037	0.00206716	0.0101643	0.0104418	0.0104418
C01B4.9e	WBGene00015273	mct-2	0.00266873	0.0391316	-0.284433	0.0946999	7.11704	0.0350324	0.00218423	0.0112679	0.010553	0.0112679
C17D12.1a	WBGene00007637	dhhc-7	0.000930129	0.0166156	-0.284708	0.0859924	7.19017	0.0287505	0.000783283	0.00475784	0.0103088	0.0103088
D2096.8	WBGene00017075	nap-1	0.00199324	0.0309879	-0.285049	0.0922118	9.67938	0.0300154	5.65651e-05	0.0069929	0.012698	0.012698
T06G6.9	WBGene00006889	pfd-3	0.000507186	0.0100278	-0.285592	0.0821389	7.44579	0.0281525	0.000504539	0.00410015	0.00961567	0.00961567
Y38F2AL.3a	WBGene00006920	vha-11	0.000255498	0.00555868	-0.286277	0.0782887	8.34323	0.0276042	0.000249841	0.00352243	0.00894385	0.00894385
K10C2.4.1	WBGene00019620	fah-1	0.000492525	0.00977191	-0.28681	0.0823034	7.51976	0.0321843	0.000700342	0.00868256	0.00946044	0.00946044
Y54E10A.9b.1	WBGene00006888	vbh-1	0.00120241	0.0205162	-0.286935	0.0886066	9.47799	0.0283124	0.000109644	0.00440644	0.011667	0.011667
F52B5.1a	WBGene00009920	abts-1	0.000938663	0.0167407	-0.287033	0.0867618	7.94394	0.0337496	0.000411134	0.0108803	0.00894267	0.0108803
C37A2.2	WBGene00004110	pqn-20	0.000384724	0.00790177	-0.288065	0.0811371	8.90381	0.028562	0.000147614	0.00443692	0.00972723	0.00972723
Y8G1A.2	WBGene00002135	inx-13	0.00349704	0.0481364	-0.288185	0.0986837	6.71935	0.0366014	0.0012098	0.0133979	0.0124289	0.0133979
F19C7.1	WBGene00017591	F19C7.1	0.00757516	0.0865836	-0.288731	0.108121	7.98513	0.039038	0.000357204	0.0171781	0.00892213	0.0171781
C16C10.7a	WBGene00004381	rnf-5	0.00720052	0.0833057	-0.290098	0.107946	6.59171	0.0309415	0.00419705	0.00292099	0.0132816	0.0132816
F53B2.6	WBGene00001820	ham-1	0.00770029	0.0874429	-0.290223	0.108904	6.24695	0.0395011	0.00166801	0.0161222	0.0160671	0.0161222
C08F1.10	WBGene00015613	C08F1.10	0.00809963	0.0908444	-0.290442	0.109688	6.22255	0.0326907	0.00176358	0.00746603	0.0162837	0.0162837
T14F9.1.2	WBGene00020507	vha-15	0.000407447	0.0083234	-0.291159	0.0823598	8.18039	0.0335719	0.000304001	0.0098707	0.00888945	0.0098707
E01G4.4a	WBGene00004116	pqn-27	0.00201892	0.0313187	-0.291212	0.0943217	7.28694	0.0338191	0.0033275	0.00714472	0.0100174	0.0100174
K09A9.5	WBGene00001520	gas-1	0.00181027	0.0287082	-0.291485	0.0934334	7.56769	0.0359649	0.000501029	0.0125937	0.00937053	0.0125937
F01G12.5b.2	WBGene00002280	let-2	0.00124472	0.021076	-0.291681	0.0903478	9.48951	0.0325776	0.000523632	0.00829415	0.0117205	0.0117205
Y73B6BL.6b.2	WBGene00022235	sqd-1	0.00159531	0.0259503	-0.291978	0.0924928	9.66647	0.0290069	0.000206979	0.00408247	0.0126254	0.0126254
Y54F10AM.5	WBGene00021849	Y54F10AM.5	0.000697375	0.0131376	-0.294787	0.0869422	7.53167	0.0351405	0.000593197	0.0107452	0.00943732	0.0107452
F34D10.4	WBGene00009374	F34D10.4	0.000295058	0.00630522	-0.295397	0.0816103	7.54842	0.0341033	0.000584684	0.00932226	0.00940568	0.00940568
F28B3.5a	WBGene00017886	F28B3.5	0.00079205	0.0145478	-0.295579	0.0880863	7.26524	0.0336542	0.00155922	0.00774602	0.0100796	0.0100796
Y39A3CR.4	WBGene00000941	ddp-1	0.00130254	0.0219569	-0.296655	0.0922602	6.84539	0.030194	0.00106397	0.00367683	0.011704	0.011704
F58F12.1	WBGene00019061	F58F12.1	0.000155819	0.00365943	-0.297384	0.0786395	8.46974	0.0321484	0.000238186	0.00678346	0.00903806	0.00903806
C04C3.3	WBGene00015413	pdhb-1	0.000173621	0.00401535	-0.298427	0.079483	8.20396	0.0342986	0.000285627	0.00919069	0.00889272	0.00919069
ZC8.4d	WBGene00022500	lfi-1	0.000670194	0.0127097	-0.29923	0.0879702	8.15271	0.036148	0.00164185	0.00996628	0.0088876	0.00996628
T22F3.2a	WBGene00020695	T22F3.2	0.000249024	0.00545316	-0.299251	0.0816898	7.52012	0.0274162	0.000550105	0.000138347	0.00945974	0.00945974
F59A2.3.1	WBGene00010303	cri-3	0.000580655	0.0112459	-0.299285	0.0869891	8.1303	0.035952	0.000449632	0.010901	0.00888767	0.010901
Y71H2AM.19b	WBGene00002244	laf-1	0.000181055	0.00414097	-0.299296	0.0799384	8.64816	0.0320066	0.000334695	0.00608183	0.00925053	0.00925053
F16B4.8c	WBGene00000387	cdc-25.2	0.00308855	0.0440942	-0.30025	0.101477	7.19566	0.029941	0.00515521	-0.00153516	0.0102913	0.0102913
F53F10.3	WBGene00018765	mpc-2	0.00135383	0.0226871	-0.301052	0.093952	6.91726	0.0377821	0.000895884	0.0123446	0.0113466	0.0123446
F41H10.10	WBGene00002032	htp-1	0.00481134	0.0611686	-0.301734	0.107021	7.48389	0.0410572	0.000585745	0.0165944	0.00953321	0.0165944
F46E10.9.2	WBGene00001073	dpy-11	0.000242812	0.00535677	-0.301805	0.082242	7.97924	0.0318456	0.00122085	0.00442867	0.00892477	0.00892477
Y65B4BR.5b	WBGene00022042	icd-2	0.00241411	0.0360722	-0.303158	0.0999235	9.56704	0.0395532	0.000144858	0.0148322	0.0120969	0.0148322
Y37D8A.17a	WBGene00012555	npp-25	0.00073847	0.0137523	-0.303263	0.0898587	7.01137	0.0298513	0.00116837	0.00165774	0.0109435	0.0109435
Y54F10AM.10	WBGene00004314	rbc-2	0.00512214	0.0640465	-0.303419	0.108393	7.55122	0.0417178	0.000510598	0.017113	0.00940048	0.017113
C46H3.2c.1	WBGene00016725	C46H3.2	0.00408531	0.0543046	-0.303802	0.105799	6.3665	0.0321261	0.00175447	0.00379242	0.0150357	0.0150357
C29E4.8.2	WBGene00002879	let-754	0.0007168	0.0133926	-0.30506	0.0901724	8.06048	0.0376757	0.000495921	0.0117007	0.00889688	0.0117007
C18E9.6	WBGene00007686	tomm-40	9.0144e-05	0.00227934	-0.306068	0.0781645	8.1765	0.0307313	0.000275471	0.00300949	0.00888906	0.00888906
K04F10.7	WBGene00019399	K04F10.7	0.000868915	0.0157185	-0.307483	0.0923414	7.37669	0.0385961	0.000662011	0.0121284	0.00977886	0.0121284
F55A4.5	WBGene00018857	stau-1	0.00127513	0.0215428	-0.308049	0.0956221	6.7074	0.0291151	0.00121161	-0.000402886	0.0125038	0.0125038
Y110A7A.15a	WBGene00022462	Y110A7A.15	0.00472744	0.0605416	-0.308511	0.109206	7.23011	0.0428647	0.000873286	0.0170155	0.0101841	0.0170155
C53D5.6	WBGene00002077	imb-3	0.000971878	0.0172251	-0.310827	0.0942316	9.77391	0.0381356	6.1117e-05	0.0113783	0.0132583	0.0132583
Y48C3A.12	WBGene00012994	Y48C3A.12	0.00106567	0.0185834	-0.311259	0.0951108	7.79701	0.0399199	0.000455316	0.0131138	0.00905526	0.0131138
C27D9.1	WBGene00016163	C27D9.1	0.00025367	0.00552946	-0.311627	0.0851782	7.78237	0.0378397	0.000376266	0.0105067	0.00906988	0.0105067
F55C10.3	WBGene00000728	col-155	0.00456585	0.0588697	-0.311653	0.109885	6.24584	0.0379064	0.00203535	0.00892475	0.0160768	0.0160768
Y66D12A.9	WBGene00013435	Y66D12A.9	0.00227499	0.034431	-0.312623	0.10244	6.91179	0.0419127	0.00102491	0.014716	0.0113723	0.014716
Y46B2A.1	WBGene00021576	fbxc-51	0.00790008	0.0892662	-0.313571	0.118047	7.00631	0.0462203	0.000960261	0.0199426	0.0109633	0.0199426
F59B2.6	WBGene00006977	zif-1	0.00122744	0.0208528	-0.31393	0.097119	8.34114	0.0408842	0.00026652	0.0138816	0.00894268	0.0138816
C48B4.10	WBGene00008173	C48B4.10	0.00140057	0.0232988	-0.314702	0.0985126	6.58908	0.0335624	0.00125678	0.00355729	0.0133003	0.0133003
ZK418.5	WBGene00022734	ZK418.5	8.64663e-05	0.00220821	-0.315707	0.0804199	7.68301	0.0330038	0.000512713	0.00336536	0.00918834	0.00918834
C50F2.6a.2	WBGene00001430	fkb-5	0.000804444	0.0147279	-0.315983	0.0942877	6.81881	0.0364347	0.00148862	0.00661283	0.0118466	0.0118466
R06C1.4	WBGene00011059	R06C1.4	8.64012e-05	0.00220821	-0.316594	0.0806421	7.62896	0.0363523	0.000486989	0.00736645	0.00926773	0.00926773
C47G2.5b	WBGene00008166	saps-1	0.000405463	0.00829031	-0.317617	0.0898111	7.52234	0.0311046	0.00264366	-0.00159314	0.00945541	0.00945541
Y48G1BL.3	WBGene00004246	puf-10	0.00518259	0.0645096	-0.317935	0.113733	7.35057	0.0458469	0.000772246	0.0186304	0.00984514	0.0186304
Y18D10A.19	WBGene00001427	fkb-2	0.000117511	0.00287238	-0.318743	0.0827632	9.06523	0.0386488	0.000132861	0.0100792	0.0101418	0.0101418
Y73B3A.4	WBGene00022206	Y73B3A.4	0.00493052	0.0622663	-0.319185	0.113527	6.30747	0.0460296	0.00199895	0.0173335	0.015538	0.0173335
Y69H2.14	WBGene00013489	col-42	0.000295076	0.00630522	-0.319583	0.0882926	9.46619	0.0361377	8.0392e-05	0.0067918	0.011613	0.011613
F59A2.1a.1	WBGene00003795	npp-9	0.00140728	0.0233858	-0.321234	0.100601	9.48152	0.0431019	0.00249967	0.0126811	0.0116833	0.0126811
D2030.6	WBGene00008416	D2030.6	0.00202063	0.0313238	-0.321742	0.104219	8.58431	0.0440893	0.000207503	0.0160848	0.00916357	0.0160848
F23B2.12	WBGene00003957	pcp-2	0.00114023	0.0196726	-0.322038	0.0989841	6.58514	0.0422642	0.00136833	0.0125714	0.0133285	0.0133285
C54D1.5	WBGene00016913	lam-2	0.0067194	0.0790251	-0.322215	0.118879	8.19761	0.0481056	0.000296987	0.0209015	0.00889168	0.0209015
Y48G1C.8b	WBGene00021681	Y48G1C.8	0.00168275	0.0270631	-0.322996	0.102827	8.31064	0.0439859	0.00319284	0.0126672	0.00892699	0.0126672
W04B5.4.1	WBGene00021021	mrpl-30	0.00391782	0.0526315	-0.323345	0.11209	6.1793	0.0464426	0.00196031	0.0168858	0.0166761	0.0168858
B0511.9c	WBGene00015235	cdc-26	0.00858169	0.0950333	-0.323466	0.123071	6.19458	0.0390299	0.00618368	0.00336732	0.0165361	0.0165361
VW02B12L.1.1	WBGene00006915	vha-6	0.0031281	0.0446028	-0.323608	0.109517	8.35008	0.0458095	0.00025527	0.0177358	0.00894778	0.0177358
C25H3.6a	WBGene00016115	mdt-26	3.46531e-05	0.000977199	-0.323626	0.0781608	8.0589	0.0333173	0.000266427	0.00210505	0.00889724	0.00889724
F55B12.3b.2	WBGene00004767	sel-10	0.00720781	0.083333	-0.324056	0.120597	7.00184	0.0334088	0.0108346	-0.00845312	0.010981	0.010981
T27F6.4	WBGene00012104	sygl-1	5.24072e-05	0.00141474	-0.324608	0.0802565	7.66075	0.0366881	0.000441915	0.00590438	0.00921976	0.00921976
W01G7.5	WBGene00002275	lem-2	0.000146363	0.00345518	-0.32484	0.0855481	7.81467	0.0404385	0.000396622	0.0105811	0.00903846	0.0105811
Y47G6A.22	WBGene00021647	Y47G6A.22	0.00153871	0.025228	-0.326373	0.103045	6.45705	0.0406745	0.00163107	0.00926736	0.0142964	0.0142964
F36H9.3	WBGene00000976	dhs-13	6.9181e-05	0.00181586	-0.326458	0.0820436	7.47906	0.0385015	0.000553351	0.00760793	0.00954337	0.00954337
F52H2.6	WBGene00018718	F52H2.6	0.00366425	0.0497538	-0.32679	0.112465	6.17419	0.0426427	0.00224924	0.0110072	0.0167233	0.0167233
C34F11.3a	WBGene00016415	ampd-1	8.56902e-05	0.00219354	-0.326804	0.0832008	7.47217	0.0376126	0.000825546	0.00613977	0.009558	0.009558
K11D9.2c	WBGene00004736	sca-1	0.00421572	0.0554783	-0.326878	0.114231	9.14192	0.0477131	0.000669332	0.0189037	0.0103722	0.0189037
F39B2.1	WBGene00009553	hinf-1	3.14239e-05	0.000895011	-0.326942	0.0785373	8.46442	0.0387612	0.000218983	0.00814829	0.00903317	0.00903317
F08B1.2a	WBGene00001538	gcy-12	0.0014628	0.0241749	-0.326981	0.102761	6.7808	0.0447466	0.00149831	0.0143413	0.0120602	0.0143413
Y59A8B.23a	WBGene00013355	gck-3	0.00436697	0.056853	-0.327324	0.114836	7.3352	0.0479671	0.00602886	0.0137521	0.00988536	0.0137521
T21G5.3	WBGene00001598	glh-1	0.00242722	0.0362442	-0.328829	0.108443	9.12856	0.0465504	0.000117539	0.0175223	0.0103304	0.0175223
Y34B4A.9	WBGene00021325	Y34B4A.9	0.000149752	0.00352786	-0.329684	0.0869538	7.41307	0.0416805	0.000666584	0.0106749	0.00969074	0.0106749
ZK669.4	WBGene00014054	dbt-1	2.72392e-05	0.000787652	-0.329968	0.07865	7.94584	0.0360024	0.000337101	0.00383634	0.00894162	0.00894162
C36E6.3	WBGene00003369	mlc-1	4.88745e-05	0.00133202	-0.330102	0.0812869	8.61714	0.0406192	0.000178872	0.00973247	0.00920675	0.00973247
Y62E10A.14	WBGene00013380	memi-2	3.4963e-05	0.000982712	-0.331326	0.08006	7.68921	0.0384931	0.00043452	0.00651556	0.0091799	0.0091799
C15F1.3c.2	WBGene00006605	tra-2	0.00220132	0.0334863	-0.331407	0.108245	6.51805	0.0365285	0.00375235	0.000721779	0.0138232	0.0138232
F49H12.5	WBGene00018656	txdc-12.2	0.00181553	0.0287516	-0.33266	0.106661	6.34235	0.0407068	0.00182533	0.00755975	0.0152394	0.0152394
Y32F6A.4	WBGene00012529	Y32F6A.4	0.00255593	0.0378711	-0.332737	0.1103	6.2467	0.0377765	0.00218005	0.0035229	0.0160692	0.0160692
C07A12.4a.1	WBGene00003963	pdi-2	0.000842028	0.0152807	-0.333164	0.0997917	9.9795	0.0358876	0.000269543	0.00296561	0.014668	0.014668
T01C3.7.2	WBGene00001423	fib-1	0.00235753	0.0353661	-0.333477	0.109658	9.29117	0.047792	0.000190269	0.0178472	0.0108872	0.0178472
F29C4.2	WBGene00017926	cox-6C	0.000711822	0.0133434	-0.33366	0.0985707	7.73784	0.0450582	0.000452059	0.0141222	0.00911858	0.0141222
F23A7.4.1	WBGene00009069	F23A7.4	0.000531856	0.0104161	-0.334812	0.0966499	8.01626	0.0448392	0.000319438	0.0136924	0.00890976	0.0136924
Y22D7AL.10.1	WBGene00021248	Y22D7AL.10	0.00055282	0.010771	-0.335502	0.0971411	8.16932	0.0450922	0.000225804	0.0139288	0.00888845	0.0139288
T03G6.3	WBGene00020195	T03G6.3	0.00233906	0.0351586	-0.335714	0.110308	6.24073	0.0477128	0.00212978	0.0152472	0.0161221	0.0161221
F25H5.3a	WBGene00009126	pyk-1	4.7676e-05	0.00130561	-0.336646	0.0827804	9.02203	0.0400735	0.000257226	0.00733563	0.0100217	0.0100217
R12E2.10	WBGene00020035	egg-5	0.00185421	0.029303	-0.336652	0.108156	8.67704	0.0480377	0.000247196	0.0172995	0.00929397	0.0172995
F15D3.7	WBGene00008857	timm-23	0.00203161	0.0314085	-0.337886	0.109505	7.24896	0.0486396	0.000799484	0.0171875	0.0101275	0.0171875
K09G1.1a	WBGene00010727	K09G1.1	0.00215117	0.0329657	-0.338444	0.110295	6.49595	0.0385235	0.0042554	0.000944888	0.0139921	0.0139921
F15E6.1	WBGene00017482	set-9	1.42964e-05	0.000443246	-0.340604	0.0784937	8.09956	0.0420527	0.000351842	0.00870978	0.00889004	0.00889004
Y102A11A.3	WBGene00022413	Y102A11A.3	0.00349598	0.0481364	-0.342057	0.117127	6.52603	0.0515634	0.00132806	0.0192501	0.0137628	0.0192501
H19M22.2b	WBGene00002915	let-805	0.0063764	0.0760523	-0.343551	0.125946	7.95976	0.0544431	0.000527703	0.0232659	0.00893422	0.0232659
T27F7.4	WBGene00194986	T27F7.4	0.000753299	0.0139746	-0.344308	0.102187	6.4759	0.0413082	0.0015153	0.00566433	0.0141479	0.0141479
Y57A10A.28	WBGene00013268	tric-1B.2	0.000246265	0.0054095	-0.344682	0.0940184	6.75144	0.0377193	0.0010264	0.00157055	0.0122328	0.0122328
T09A5.11.2	WBGene00011638	ostb-1	3.52681e-05	0.000989639	-0.344752	0.0833443	8.74988	0.0439916	0.000219565	0.0101998	0.00941505	0.0101998
F42G4.3a.2	WBGene00006999	zyx-1	0.00147442	0.0243318	-0.345347	0.108611	7.20447	0.0419736	0.00743106	0.000311745	0.0102634	0.0102634
Y63D3A.5.2	WBGene00006565	tfg-1	0.00110845	0.0192117	-0.346478	0.106234	8.24418	0.0495569	0.000359762	0.0165688	0.00890188	0.0165688
C30C11.4.1	WBGene00016250	hsp-110	0.000329705	0.00693446	-0.346724	0.0965598	9.4158	0.0472538	7.42376e-05	0.0139115	0.0113897	0.0139115
C16A3.10.2	WBGene00015814	oatr-1	0.000875696	0.0158035	-0.347145	0.10432	7.98306	0.049212	0.00166434	0.0146597	0.00892305	0.0146597
T03F6.1	WBGene00011398	qdpr-1	8.74969e-05	0.00222648	-0.347895	0.0886836	7.02368	0.0451134	0.000901482	0.0101037	0.0108957	0.0108957
C10G8.8a	WBGene00015684	C10G8.8	0.000530178	0.0103921	-0.348686	0.10063	7.14299	0.0454152	0.00472563	0.00645021	0.010464	0.010464
C46C2.2.2	WBGene00008110	C46C2.2	0.000249387	0.00545316	-0.348691	0.0951956	7.46423	0.0473503	0.00130521	0.0122881	0.0095751	0.0122881
C09D1.1e	WBGene00006820	unc-89	0.00152335	0.0250122	-0.348806	0.110027	7.1279	0.0465568	0.00764339	0.00492798	0.0105154	0.0105154
ZK512.3	WBGene00000425	ced-11	0.00440442	0.0571771	-0.348975	0.122549	5.88912	0.051081	0.00286699	0.0153153	0.0196603	0.0196603
F14H12.3	WBGene00017471	F14H12.3	0.00771999	0.0875955	-0.349781	0.131296	5.73668	0.0573903	0.00347171	0.0223861	0.0215242	0.0223861
T04C10.4.2	WBGene00000221	atf-5	0.00199351	0.0309879	-0.350588	0.113415	6.82518	0.0450586	0.00748253	0.00274875	0.0118119	0.0118119
F59C12.4	WBGene00045272	F59C12.4	0.00206558	0.0318304	-0.351113	0.113974	6.12632	0.0376918	0.00231149	-0.00142681	0.0171736	0.0171736
Y63D3A.8	WBGene00013407	Y63D3A.8	5.48613e-05	0.00147574	-0.351333	0.0870953	7.10643	0.0394878	0.000788164	0.00228356	0.0105902	0.0105902
T20D3.2	WBGene00011856	T20D3.2	1.48427e-05	0.000457689	-0.351774	0.0812222	8.17527	0.04504	0.000273166	0.0096224	0.00888895	0.0096224
F35E12.5	WBGene00009429	irg-5	0.000418735	0.00851577	-0.352047	0.099787	7.83912	0.0491301	0.000402516	0.0145337	0.00901668	0.0145337
F52C9.8d.1	WBGene00004095	pqe-1	0.00494808	0.0624188	-0.352245	0.125337	7.39922	0.0560409	0.0138402	0.00968205	0.0097237	0.0097237
C45B11.1a	WBGene00006443	pak-2	0.00507799	0.0636693	-0.352274	0.12572	7.09901	0.0561957	0.00464207	0.0190663	0.0106165	0.0190663
ZK896.7	WBGene00014138	clec-186	2.03477e-05	0.000606885	-0.353028	0.0828503	7.43884	0.0441684	0.000664975	0.00780967	0.00963128	0.00963128
K08D12.3a	WBGene00019537	K08D12.3	2.5353e-05	0.000737798	-0.353224	0.0838687	9.1655	0.0440438	0.000103336	0.00816373	0.0104476	0.0104476
K11G12.5.1	WBGene00019656	slc-25A10	0.000522017	0.0102616	-0.354476	0.102178	6.79511	0.0502243	0.000995068	0.0146654	0.0119785	0.0146654
F09G8.8	WBGene00017322	clec-160	0.000888404	0.0160074	-0.357755	0.107638	6.32076	0.0450232	0.00195537	0.00632802	0.0154237	0.0154237
Y74C9A.2a.5	WBGene00022276	nlp-40	5.58991e-05	0.00149658	-0.359	0.0890932	7.29847	0.0480092	0.00192139	0.00975974	0.00998502	0.00998502
F54F3.1c	WBGene00003738	nid-1	0.000176813	0.00406849	-0.359508	0.095868	7.07205	0.0474824	0.0030722	0.00781365	0.0107138	0.0107138
C04B4.2	WBGene00007290	C04B4.2	8.25741e-06	0.00027513	-0.360796	0.0809251	7.59854	0.0448539	0.000506225	0.00674597	0.00931707	0.00931707
C49C8.5.1	WBGene00016769	C49C8.5	0.000376251	0.00777688	-0.361842	0.101749	6.63637	0.0403732	0.00255904	-0.00119108	0.0129704	0.0129704
T21B6.3	WBGene00011880	T21B6.3	0.00044056	0.00890392	-0.361888	0.10297	6.45854	0.0482301	0.00161959	0.00955688	0.0142845	0.0142845
F33H1.4.2	WBGene00009365	F33H1.4	0.00161663	0.0262431	-0.363106	0.115166	8.32415	0.0554697	0.00446829	0.0154266	0.00893361	0.0154266
T03F1.8b	WBGene00020190	guk-1	0.000274735	0.0059431	-0.364091	0.100079	6.84099	0.0444302	0.00329655	0.00253051	0.0117272	0.0117272
F13B10.2d.2	WBGene00004414	rpl-3	0.00166883	0.0269345	-0.365127	0.116149	7.58615	0.0561842	0.00688673	0.0133493	0.00933813	0.0133493
F02E8.1.1	WBGene00000207	asb-2	0.000157184	0.00368007	-0.366449	0.0969586	7.57447	0.0515666	0.00407639	0.0100251	0.00935849	0.0100251
Y17G7B.20c.2	WBGene00012471	Y17G7B.20	0.00286613	0.0414123	-0.367596	0.123282	7.83048	0.0587763	0.00672636	0.0160714	0.00902418	0.0160714
F54D5.4	WBGene00010050	F54D5.4	6.66257e-06	0.000226637	-0.36794	0.0816883	7.54101	0.0478404	0.000589927	0.0084431	0.00941955	0.00941955
Y34B4A.6	WBGene00021322	Y34B4A.6	1.91375e-05	0.000577603	-0.36847	0.0861974	7.82371	0.049647	0.000398248	0.0107467	0.0090302	0.0107467
K08D8.6a	WBGene00010660	K08D8.6	1.35176e-05	0.000422555	-0.368665	0.0847203	7.35817	0.0427041	0.000940717	0.00147166	0.00982559	0.00982559
Y39A1A.22	WBGene00012659	Y39A1A.22	0.00422236	0.0554783	-0.370655	0.129552	7.47823	0.0613559	0.000532463	0.0246431	0.00954513	0.0246431
K02D7.4	WBGene00001099	dsc-4	5.57314e-05	0.00149407	-0.370916	0.0920343	6.86373	0.0472989	0.00109668	0.00643492	0.0116088	0.0116088
C39H7.4	WBGene00016542	C39H7.4	0.00557063	0.0682665	-0.371938	0.134175	5.58427	0.0461403	0.00336144	0.00243713	0.023643	0.023643
Y113G7A.4a.1	WBGene00003566	ncx-1	0.000921011	0.0164905	-0.374554	0.113035	6.23284	0.055438	0.00297342	0.0137149	0.016192	0.016192
K02E7.6	WBGene00019311	K02E7.6	0.00428946	0.0560363	-0.37495	0.131283	5.66986	0.0504555	0.00343371	0.00691536	0.022419	0.022419
F53F4.16	WBGene00023419	F53F4.16	0.00266249	0.0390669	-0.37523	0.1249	5.84172	0.0480927	0.00318502	0.00413172	0.0202151	0.0202151
W06A7.3b	WBGene00004336	ret-1	0.000268168	0.00580798	-0.376081	0.103198	7.61242	0.055211	0.0016006	0.0143743	0.00929415	0.0143743
F54E2.3l	WBGene00004130	ketn-1	1.55552e-05	0.000477719	-0.376101	0.0870468	7.72821	0.0507537	0.00223569	0.00816192	0.00913004	0.00913004
F27D4.5	WBGene00006518	bckd-1B	2.15039e-06	8.25236e-05	-0.377417	0.0796448	7.76313	0.0492402	0.000424877	0.00770903	0.00909007	0.00909007
H40L08.2a	WBGene00014793	H40L08.2	0.00901347	0.09871	-0.377514	0.144556	5.70631	0.0590012	0.00942011	0.0108876	0.0219245	0.0219245
C16C10.3	WBGene00007624	hrde-1	0.000434398	0.00880285	-0.378707	0.107641	9.71593	0.0569294	6.27288e-05	0.017317	0.0129085	0.017317
Y116A8C.26a.2	WBGene00013803	snx-13	0.00431331	0.0562833	-0.379638	0.133006	6.95006	0.0597477	0.0153383	0.00529943	0.0111976	0.0111976
C27C7.1	WBGene00007766	C27C7.1	8.03996e-06	0.000268672	-0.381451	0.0854482	7.22644	0.0514868	0.000756756	0.00903754	0.0101953	0.0101953
F55H2.6	WBGene00000550	clu-1	0.000242922	0.00535677	-0.384986	0.104912	8.8235	0.0576721	0.000153101	0.0163567	0.00955462	0.0163567
ZK525.2	WBGene00000179	aqp-11	0.000105978	0.00261053	-0.386957	0.0998216	6.54828	0.0472419	0.00134973	0.00155186	0.0135968	0.0135968
T09B4.8	WBGene00020382	T09B4.8	2.58217e-05	0.000749522	-0.388695	0.0923815	6.82449	0.0476338	0.000985835	0.0019001	0.0118157	0.0118157
Y62E10A.11	WBGene00014938	mdt-9	0.0055372	0.0679824	-0.389429	0.140386	6.67887	0.0507743	0.0168753	-0.010278	0.0126869	0.0126869
Y37A1B.5a	WBGene00012538	Y37A1B.5	0.00341605	0.0475469	-0.393031	0.134251	5.72725	0.0663661	0.0053877	0.0196423	0.0216473	0.0216473
R07E5.13	WBGene00011119	mpc-1	1.33075e-05	0.00041656	-0.393664	0.0903938	6.91196	0.0513538	0.000884996	0.00519311	0.0113716	0.0113716
C07A9.9	WBGene00007405	C07A9.9	0.00279939	0.0406028	-0.394412	0.131957	5.65162	0.0567741	0.00344661	0.00918583	0.0226722	0.0226722
F21G4.2	WBGene00003410	mrp-4	0.000892458	0.0160551	-0.394844	0.118843	8.95734	0.063719	0.000139124	0.0210464	0.00985447	0.0210464
Y105E8B.5	WBGene00013690	hprt-1	7.01174e-06	0.000236394	-0.396081	0.0881487	7.06972	0.0533162	0.000932951	0.0068821	0.0107223	0.0107223
C12C8.2a	WBGene00007533	cbl-1	0.000606555	0.011678	-0.398207	0.116141	6.25424	0.063757	0.00196428	0.0182687	0.0160027	0.0182687
H18N23.2b	WBGene00019211	H18N23.2	0.00324926	0.0457976	-0.398407	0.135369	5.93867	0.0619875	0.00838462	0.00957683	0.0191025	0.0191025
T08H10.1	WBGene00020369	T08H10.1	4.00638e-06	0.000143354	-0.399489	0.0866372	7.16122	0.0567396	0.000856059	0.0102218	0.0104029	0.0104029
R07B1.4	WBGene00001784	gst-36	0.000199493	0.00450383	-0.400181	0.107586	6.31825	0.0613828	0.00191672	0.0147573	0.0154453	0.0154453
F54D5.8.2	WBGene00001031	dnj-13	0.00066493	0.0126309	-0.401176	0.117867	8.20059	0.0649536	0.00263011	0.0182087	0.00889215	0.0182087
T10B10.2	WBGene00011679	ucr-2.2	9.77952e-05	0.00244832	-0.403285	0.103513	6.86365	0.0616494	0.00106072	0.0150116	0.0116092	0.0150116
Y71F9AL.13b.2	WBGene00004412	rpl-1	0.00760524	0.0868234	-0.404047	0.151379	6.1134	0.0764747	0.00568679	0.0286865	0.0172979	0.0286865
C40H1.1	WBGene00000770	cpb-1	2.89449e-06	0.000107198	-0.406188	0.0868262	7.10944	0.0540716	0.000728548	0.00499034	0.0105796	0.0105796
F57F4.3	WBGene00001581	gfi-1	0.00635414	0.0758873	-0.406832	0.149081	9.17604	0.0763239	0.000254106	0.0330838	0.010482	0.0330838
C44C1.1	WBGene00016641	C44C1.1	0.000870712	0.0157318	-0.407273	0.122331	5.8693	0.0655798	0.00255745	0.0172154	0.0198898	0.0198898
F35C5.9	WBGene00009397	clec-66	0.00900453	0.0986596	-0.407325	0.155951	5.84709	0.078959	0.0028834	0.0335976	0.0201512	0.0335976
C06E7.1a	WBGene00015538	sams-3	2.39234e-07	1.11107e-05	-0.407501	0.0788822	8.13559	0.0570614	0.000446075	0.00860941	0.00888752	0.00888752
C05E11.5	WBGene00000136	amt-4	0.00467735	0.0600691	-0.407603	0.144108	6.01504	0.0747628	0.00255818	0.0285926	0.0182841	0.0285926
F56H11.1a	WBGene00001403	fbl-1	0.00870808	0.0961989	-0.408729	0.155807	5.43814	0.0641345	0.0104546	0.00706639	0.0259589	0.0259589
F25B4.9	WBGene00017772	clec-1	1.52955e-07	7.55054e-06	-0.409815	0.0780754	8.16648	0.0530296	0.000255408	0.00305084	0.00888825	0.00888825
F25H8.3a	WBGene00001650	gon-1	0.00738634	0.0848945	-0.410865	0.153371	6.0933	0.055112	0.0177903	-0.0122041	0.0174936	0.0174936
F07A11.5	WBGene00008548	F07A11.5	0.00291097	0.0419537	-0.412685	0.138625	5.50694	0.0570139	0.00399459	0.00340696	0.0248308	0.0248308
C14C6.5a	WBGene00015759	C14C6.5	5.12507e-05	0.00138682	-0.413071	0.101997	6.50347	0.0548659	0.00167068	0.00292647	0.0139343	0.0139343
F35H10.10	WBGene00018073	F35H10.10	0.000465465	0.00932445	-0.415153	0.118619	6.62031	0.0685901	0.00131483	0.0197909	0.0130807	0.0197909
K04G7.4a.2	WBGene00019401	nuo-4	0.00066712	0.0126619	-0.416772	0.122481	7.65523	0.0701114	0.00359573	0.0189066	0.00922782	0.0189066
C52E4.5a.2	WBGene00008258	mans-2	0.000139197	0.00332393	-0.418444	0.10984	6.46062	0.0595518	0.00382903	0.00494989	0.0142681	0.0142681
Y111B2A.22c	WBGene00007027	ssl-1	0.00179681	0.0285682	-0.419241	0.13429	6.63707	0.0743693	0.00847878	0.0185718	0.0129656	0.0185718
C05D11.11a	WBGene00003214	mel-32	0.0027602	0.0401623	-0.419964	0.140303	8.37305	0.0765329	0.00735964	0.0221679	0.00896193	0.0221679
K05C4.2.1	WBGene00010579	K05C4.2	0.000263886	0.00572474	-0.423791	0.116158	7.48091	0.0700711	0.00254603	0.0176931	0.00953947	0.0176931
C32H11.12	WBGene00007875	dod-24	0.00424388	0.055687	-0.423896	0.148244	7.07701	0.0802779	0.000889784	0.0320747	0.0106957	0.0320747
B0286.3	WBGene00015116	pacs-1	0.00283646	0.0410619	-0.424086	0.142076	6.45139	0.0781775	0.00178564	0.0284927	0.0143414	0.0284927
T02C5.3b	WBGene00020160	igcm-3	0.00574258	0.0701094	-0.424178	0.153569	7.05426	0.0822782	0.00363376	0.0317414	0.0107796	0.0317414
C07A9.11	WBGene00003572	ncx-7	0.0066773	0.0786519	-0.424366	0.156447	5.18068	0.071802	0.00614243	0.0160776	0.030571	0.030571
F58G1.4	WBGene00010266	dct-18	7.43768e-08	3.94544e-06	-0.426718	0.0793118	7.82656	0.0604484	0.000407891	0.0068694	0.00902765	0.00902765
C05C8.3.2	WBGene00001428	fkb-3	0.00155763	0.0254648	-0.428588	0.135469	5.89815	0.0723534	0.0079708	0.0135882	0.0195571	0.0195571
E01G4.3a.2	WBGene00008446	E01G4.3	0.00361176	0.0493937	-0.429717	0.147658	6.44236	0.0815605	0.0162215	0.0164828	0.0144135	0.0164828
T24C12.3	WBGene00020765	T24C12.3	0.000281004	0.00606143	-0.430419	0.118501	5.98274	0.0586136	0.0024393	0.00135503	0.0186243	0.0186243
T06D8.1a	WBGene00011522	srap-1	0.00912652	0.0994695	-0.431205	0.165385	6.50615	0.0886039	0.0160483	0.02498	0.0139138	0.02498
F54D5.12	WBGene00010055	F54D5.12	6.52212e-08	3.49233e-06	-0.43288	0.0801057	7.73063	0.0628347	0.000498259	0.00777557	0.00912713	0.00912713
R02D3.1a	WBGene00019819	aass-1	2.00542e-05	0.000598914	-0.436908	0.102457	7.47798	0.0698636	0.000638232	0.0151081	0.00954566	0.0151081
F13D12.6.2	WBGene00008741	F13D12.6	7.88685e-05	0.00204653	-0.43733	0.110778	8.06481	0.0721034	0.00312607	0.0152815	0.00889591	0.0152815
C18E3.7d.1	WBGene00004093	ppw-1	0.000423725	0.00860189	-0.437649	0.124161	7.11053	0.0685785	0.0125482	0.00134887	0.0105758	0.0105758
F56A8.3b.5	WBGene00010139	F56A8.3	0.000871033	0.0157318	-0.438509	0.131717	7.24516	0.0785062	0.00313442	0.0228896	0.0101388	0.0228896
ZK185.3	WBGene00022683	ZK185.3	0.00732396	0.0843478	-0.440041	0.164088	5.0514	0.0676435	0.00751102	0.00442973	0.0328762	0.0328762
W10C8.5.1	WBGene00021128	W10C8.5	0.00454968	0.0587277	-0.440247	0.155164	7.2214	0.0870363	0.000814478	0.0352994	0.0102108	0.0352994
C34C12.5.2	WBGene00007924	rsu-1	0.0045696	0.0588847	-0.440447	0.155311	6.3342	0.0823485	0.0208735	0.00931442	0.0153087	0.0153087
D1054.8	WBGene00008375	D1054.8	0.000674903	0.0127671	-0.441309	0.129813	5.71462	0.0608891	0.00346314	-0.000384344	0.021814	0.021814
Y41D4B.16	WBGene00021518	hpo-6	1.88326e-06	7.28865e-05	-0.441663	0.092678	6.83417	0.068155	0.00112035	0.0109236	0.0117635	0.0117635
C55F2.1b	WBGene00016957	atic-1	4.99043e-05	0.00135522	-0.44283	0.109177	6.55653	0.0723999	0.00434349	0.0126194	0.0135359	0.0135359
C26H9A.1b	WBGene00006916	vha-7	0.00268702	0.0393492	-0.44422	0.148002	7.59643	0.0767221	0.0235363	-0.00163295	0.00932062	0.00932062
K01A11.1	WBGene00010449	K01A11.1	0.00713135	0.0826736	-0.444863	0.165337	4.99276	0.065062	0.00705063	6.30221e-05	0.0339538	0.0339538
W07B3.2d.3	WBGene00001561	gei-4	0.00405658	0.0541936	-0.44524	0.154935	6.38193	0.0882773	0.0185289	0.0174782	0.0149068	0.0174782
C24A11.9	WBGene00000761	coq-1	3.00717e-06	0.000110735	-0.447766	0.0958746	6.69507	0.0639117	0.00120569	0.00349851	0.0125822	0.0125822
R03D7.1	WBGene00010988	metr-1	4.53537e-07	1.98484e-05	-0.451692	0.0895328	8.51462	0.0708271	0.000158569	0.0118656	0.00908261	0.0118656
C49C3.4b	WBGene00008194	C49C3.4	8.42647e-06	0.000279943	-0.453874	0.101901	7.1352	0.0649176	0.00508541	-0.00118892	0.0104904	0.0104904
K06A4.5	WBGene00010595	haao-1	0.00447155	0.0578506	-0.455748	0.160315	5.57111	0.0931531	0.00409332	0.0344581	0.0238393	0.0344581
K09A9.3	WBGene00010701	ent-2	1.28092e-08	7.77328e-07	-0.4577	0.0804594	7.63999	0.0647523	0.000459883	0.00192181	0.00925068	0.00925068
C06A8.1a.1	WBGene00015512	mthf-1	0.000822209	0.015021	-0.457979	0.136906	7.80775	0.0854153	0.00244274	0.0256721	0.00904494	0.0256721
K08D8.5	WBGene00010659	K08D8.5	0.000780739	0.0143748	-0.458315	0.136422	6.16732	0.085349	0.00219969	0.0257168	0.0167869	0.0257168
D1005.t1	WBGene00023263	D1005.t1	0.00587535	0.0713745	-0.459136	0.166676	4.98056	0.0930266	0.00748868	0.0297422	0.0341828	0.0341828
T27A3.1c.1	WBGene00020838	trak-1	0.00228613	0.0345454	-0.46204	0.151473	6.59247	0.0713079	0.0211401	-0.0120605	0.0132762	0.0132762
F17C8.9	WBGene00185014	F17C8.9	0.00737552	0.0848128	-0.462515	0.172619	4.93456	0.0999328	0.00704849	0.0376475	0.0350645	0.0376475
B0365.6.1	WBGene00007153	clec-41	3.28641e-08	1.87441e-06	-0.463894	0.0839559	7.59326	0.0718236	0.0012469	0.00783355	0.00932598	0.00932598
W06D12.2	WBGene00006692	twk-42	0.00768612	0.0874128	-0.46627	0.174924	4.8477	0.10194	0.00859205	0.0373056	0.0368343	0.0373056
T25C12.3	WBGene00012018	T25C12.3	3.74733e-05	0.00104636	-0.467332	0.113361	9.05617	0.0809406	0.000121215	0.0191547	0.010116	0.0191547
W01F3.1a	WBGene00012184	mnr-1	0.00011648	0.00285025	-0.468803	0.121659	5.92116	0.0739825	0.00290421	0.00715774	0.0192972	0.0192972
Y22D7AL.5a.1	WBGene00002025	hsp-60	0.000382601	0.00787238	-0.469756	0.132259	9.29483	0.0871921	9.25591e-05	0.0261459	0.0109009	0.0261459
Y38F2AL.4.2	WBGene00006912	vha-3	0.00479683	0.0610865	-0.47013	0.166691	6.67668	0.0996495	0.00253563	0.0391431	0.0127012	0.0391431
ZK1290.4c	WBGene00003592	nfi-1	0.0032962	0.0463321	-0.470247	0.16002	6.68878	0.091189	0.0257871	0.0052744	0.0126226	0.0126226
R13D7.2	WBGene00020054	R13D7.2	0.00426792	0.0558511	-0.470874	0.164777	4.95731	0.080332	0.00610271	0.0111663	0.0346244	0.0346244
C14A11.3a	WBGene00006496	cgef-1	0.00365378	0.0497185	-0.472451	0.162544	6.15779	0.0986676	0.0111186	0.0285123	0.0168758	0.0285123
F28A12.4.1	WBGene00017881	asp-13	0.00029081	0.00625517	-0.473235	0.130607	7.58481	0.0837734	0.0162469	0.00448796	0.00934045	0.00934045
C24H11.7b	WBGene00007703	gbf-1	0.000567401	0.0110174	-0.473941	0.137504	6.02768	0.0767406	0.010208	0.00148504	0.0181532	0.0181532
Y17G7B.20b.2	WBGene00012471	Y17G7B.20	0.00269991	0.0394871	-0.474252	0.158085	6.95401	0.0974634	0.017231	0.0202551	0.0111803	0.0202551
Y43F4B.3	WBGene00012802	set-25	0.000221353	0.00493373	-0.475109	0.128641	6.13303	0.0875768	0.0018355	0.0229871	0.0171096	0.0229871
F56A4.2	WBGene00018910	F56A4.2	0.000156405	0.00366562	-0.476297	0.125982	7.72129	0.0871034	0.000236254	0.023571	0.00913849	0.023571
Y19D10A.9	WBGene00021224	clec-209	0.000156405	0.00366562	-0.476297	0.125982	7.72129	0.0871034	0.000236254	0.023571	0.00913849	0.023571
W01D2.1.2	WBGene00012179	W01D2.1	0.00744914	0.0854867	-0.477871	0.178572	8.93437	0.106774	0.00800722	0.0398248	0.00979864	0.0398248
R11G11.7	WBGene00004144	pqn-60	0.00324024	0.0457432	-0.481884	0.163685	5.01402	0.0836899	0.00662974	0.0109032	0.0335592	0.0335592
C10E2.6	WBGene00015676	mct-6	1.35876e-09	9.57315e-08	-0.482452	0.0796088	7.76806	0.0762562	0.000421564	0.00761353	0.00908478	0.00908478
F42A10.9	WBGene00023489	F42A10.9	0.000920597	0.0164905	-0.4826	0.145636	5.35104	0.0737419	0.00432209	0.000516874	0.0274928	0.0274928
H12C20.3a	WBGene00003658	nhr-68	9.9135e-05	0.00247653	-0.48274	0.124012	5.96701	0.0744125	0.00427525	0.00135115	0.0187931	0.0187931
Y39E4B.5	WBGene00012716	Y39E4B.5	4.08915e-07	1.80693e-05	-0.484662	0.095693	7.44986	0.0814579	0.000647674	0.0130881	0.00960661	0.0130881
T13A10.10a	WBGene00000005	aat-4	0.00371259	0.0503201	-0.486709	0.167738	5.03936	0.0719663	0.00910922	-0.00798339	0.0330948	0.0330948
C14F5.3b	WBGene00006588	tnt-3	0.0025115	0.0373313	-0.488569	0.161673	6.08993	0.0873906	0.0216807	-0.00195503	0.0175267	0.0175267
W01D2.1.3	WBGene00012179	W01D2.1	0.00691892	0.080787	-0.489464	0.181235	5.6595	0.111288	0.0143863	0.0348826	0.0225624	0.0348826
C47B2.6a	WBGene00008132	gale-1	7.82814e-09	4.97612e-07	-0.49249	0.0853222	7.4715	0.0791346	0.00136036	0.00660319	0.00955944	0.00955944
ZC8.4a.2	WBGene00022500	lfi-1	0.00195353	0.0305124	-0.492688	0.159075	7.07185	0.0781337	0.0272427	-0.0206034	0.0107145	0.0107145
T22B7.7	WBGene00020674	T22B7.7	0.00404042	0.0540552	-0.492691	0.171371	5.61523	0.108065	0.00372807	0.0403242	0.0231896	0.0403242
Y54G2A.6a	WBGene00021872	clec-85	2.32109e-06	8.8182e-05	-0.494033	0.104596	6.59491	0.0808001	0.00315167	0.00632257	0.0132589	0.0132589
F55G11.4	WBGene00010124	F55G11.4	7.75539e-06	0.000259543	-0.496869	0.111111	6.21979	0.0840406	0.00221007	0.010261	0.0163084	0.0163084
F40A3.2	WBGene00018217	F40A3.2	0.000281533	0.00606708	-0.49836	0.137224	5.58976	0.0901526	0.00468396	0.0148708	0.0235617	0.0235617
W08D2.5b	WBGene00012341	catp-6	1.04974e-05	0.000339332	-0.498992	0.113236	6.97865	0.0869368	0.00815835	0.0071401	0.0110752	0.0110752
F58E10.3a.3	WBGene00010260	ddx-17	0.000114269	0.00279916	-0.500543	0.129738	9.24034	0.0953615	0.00171937	0.0235286	0.0107015	0.0235286
K11H12.7	WBGene00019663	K11H12.7	3.97081e-05	0.00110065	-0.501091	0.121944	5.88101	0.0871209	0.00255186	0.0121898	0.0197538	0.0197538
Y43H11AL.3b	WBGene00004166	pqn-85	0.000141308	0.00336376	-0.502302	0.131981	6.16019	0.0840158	0.00927512	0.00112926	0.0168534	0.0168534
Y39E4A.3a	WBGene00012713	bckd-1A	0.00474976	0.0607248	-0.503983	0.178494	6.91739	0.114432	0.0247745	0.0230156	0.011346	0.0230156
W01A11.4	WBGene00002273	lec-10	0.00138749	0.0230981	-0.50402	0.157642	7.7884	0.106032	0.000436882	0.0368397	0.00906379	0.0368397
F16A11.3a	WBGene00008878	ppfr-1	0.00240244	0.035945	-0.505496	0.166535	7.34789	0.0940753	0.0317489	-0.00997688	0.0098521	0.0098521
F11C1.5a.1	WBGene00008694	F11C1.5	0.00498506	0.0627462	-0.506002	0.1802	7.31805	0.115778	0.0321027	0.0166054	0.00993125	0.0166054
M88.1.2	WBGene00010904	ugt-62	0.00349175	0.0481364	-0.506336	0.173358	6.86425	0.112976	0.0259063	0.0191729	0.0116062	0.0191729
F46G10.6	WBGene00003511	mxl-3	1.02285e-05	0.000331111	-0.50639	0.114768	6.0892	0.0903922	0.00222374	0.0146051	0.0175338	0.0175338
Y105C5B.5a	WBGene00013647	Y105C5B.5	0.000355487	0.00741506	-0.507446	0.142098	6.60862	0.101481	0.00139984	0.028888	0.0131622	0.028888
F40G9.2	WBGene00018240	cox-17	0.00120374	0.0205195	-0.507973	0.156879	5.1354	0.0947541	0.00554286	0.0161362	0.0313736	0.0313736
F25H5.3c.1	WBGene00009126	pyk-1	0.00329073	0.0462837	-0.508033	0.172848	5.8639	0.113281	0.0182078	0.0266068	0.0199529	0.0266068
T19D12.1	WBGene00020576	T19D12.1	1.49562e-06	5.93992e-05	-0.508432	0.105663	6.3596	0.0834543	0.00165346	0.00572584	0.0150936	0.0150936
F14F4.3	WBGene00003411	mrp-5	7.16654e-11	5.99592e-09	-0.508749	0.0780633	8.25912	0.0840705	0.000234384	0.00779427	0.00890644	0.00890644
F09F7.4a.1	WBGene00017301	hach-1	3.15272e-10	2.42386e-08	-0.508999	0.080908	7.92482	0.0849084	0.000865314	0.00811535	0.00895385	0.00895385
Y53F4B.30	WBGene00001775	gst-27	6.75102e-07	2.8398e-05	-0.510228	0.102695	6.48127	0.0860673	0.00171344	0.00824592	0.0141059	0.0141059
T01D1.3	WBGene00020148	T01D1.3	0.0021795	0.0332655	-0.510436	0.166558	4.96255	0.0951908	0.00708802	0.0141962	0.0345243	0.0345243
F54F11.2a	WBGene00010070	nep-17	0.00791043	0.0892944	-0.511408	0.192558	8.733	0.122956	0.00596991	0.0496478	0.0093855	0.0496478
B0513.3b	WBGene00004443	rpl-29	0.000970557	0.0172151	-0.511906	0.155174	5.23732	0.104494	0.00655481	0.0257953	0.0295634	0.0295634
Y45G5AM.1a.1	WBGene00003704	nhr-114	0.00105069	0.0183785	-0.513079	0.156589	5.81118	0.0931504	0.0161961	0.00152325	0.0205841	0.0205841
C42D8.2b.2	WBGene00006926	vit-2	0.00315729	0.0449627	-0.516601	0.175001	7.41147	0.116813	0.00577487	0.0401631	0.00969451	0.0401631
C01H6.4	WBGene00007254	C01H6.4	0.00273641	0.0398672	-0.517223	0.172644	4.82068	0.0848689	0.00728824	-0.00152185	0.0374206	0.0374206
T20B3.2.1	WBGene00006585	tni-3	0.00019936	0.00450383	-0.518309	0.139337	6.6732	0.103891	0.00665075	0.0224714	0.012724	0.0224714
R02F11.3b	WBGene00019841	R02F11.3	0.00816059	0.0913032	-0.518845	0.196134	5.13312	0.126922	0.0216646	0.0360385	0.0314141	0.0360385
T28D6.2	WBGene00006533	tba-7	0.00486635	0.0616956	-0.531874	0.188893	5.41707	0.127684	0.0042854	0.0492352	0.0263188	0.0492352
H43E16.1	WBGene00019273	H43E16.1	0.000715854	0.013389	-0.538783	0.159241	5.1902	0.117515	0.00647642	0.0315603	0.0304022	0.0315603
T19H12.10	WBGene00020593	ugt-11	0.00902836	0.0987781	-0.539126	0.206484	4.9337	0.13836	0.00869228	0.0552613	0.0350812	0.0552613
T07A9.11.4	WBGene00004493	rps-24	0.00235176	0.0353027	-0.541621	0.17806	8.36441	0.126052	0.00322705	0.0443309	0.00895643	0.0443309
H11L12.1	WBGene00019189	H11L12.1	0.00269129	0.0393863	-0.54187	0.180566	4.72367	0.101794	0.00919623	0.00793734	0.0397097	0.0397097
K02G10.7b	WBGene00000176	aqp-8	0.00034731	0.00725778	-0.542447	0.151641	5.95072	0.115868	0.00262357	0.0318687	0.0189701	0.0318687
H20E11.1a	WBGene00019213	H20E11.1	0.00021055	0.00471604	-0.544035	0.146798	5.47393	0.114652	0.00552846	0.026796	0.0253632	0.026796
F37C12.4.2	WBGene00004450	rpl-36	0.00189035	0.0297091	-0.546096	0.175766	5.49263	0.126539	0.0134499	0.0328909	0.0250597	0.0328909
C01G10.4	WBGene00007231	C01G10.4	0.00532816	0.06588	-0.547216	0.196382	4.74098	0.136112	0.00848926	0.0493593	0.0392773	0.0493593
W05E7.1	WBGene00001692	grd-3	0.00386838	0.0520904	-0.550999	0.190743	7.19648	0.134739	0.000817927	0.0537563	0.0102887	0.0537563
F08A8.3	WBGene00008566	acox-1.3	3.83379e-05	0.00106657	-0.552459	0.134181	5.64558	0.100079	0.00424983	0.0063949	0.0227569	0.0227569
T27A10.3a	WBGene00000515	ckc-1	5.57396e-05	0.00149407	-0.560608	0.139103	5.92545	0.100465	0.00977529	-0.00204971	0.0192492	0.0192492
T25B9.1	WBGene00012007	T25B9.1	0.00053312	0.0104318	-0.56136	0.162077	5.02415	0.113024	0.00603055	0.0170774	0.0333729	0.0333729
Y71F9B.1	WBGene00022125	Y71F9B.1	0.00277481	0.0403252	-0.567556	0.189714	4.6236	0.139436	0.0115264	0.0419742	0.0424606	0.0424606
F22D3.1c.2	WBGene00000459	ceh-38	0.000157735	0.00368919	-0.567794	0.150267	7.2961	0.103832	0.0238787	-0.0149848	0.00999163	0.00999163
F49E11.11	WBGene00009896	scl-3	0.000862886	0.0156343	-0.568826	0.170727	4.89506	0.108087	0.00787161	0.00590121	0.0358499	0.0358499
T11B7.4b	WBGene00001132	alp-1	2.74617e-06	0.00010245	-0.571399	0.121861	6.23171	0.10736	0.006073	0.00569076	0.0162021	0.0162021
Y55B1BM.1b	WBGene00021910	stim-1	0.00828429	0.0922336	-0.572382	0.21679	5.4122	0.154684	0.0321569	0.03834	0.0264031	0.03834
CC8.2b	WBGene00016987	CC8.2	3.42232e-07	1.54527e-05	-0.579383	0.113636	6.18998	0.105171	0.00279178	0.00279019	0.0165781	0.0165781
K10C2.1	WBGene00019617	K10C2.1	6.3544e-07	2.69287e-05	-0.579469	0.116356	7.80416	0.116982	0.00046257	0.0198456	0.00904835	0.0198456
F18E9.3	WBGene00017569	F18E9.3	0.00254243	0.0377563	-0.582211	0.192897	4.59914	0.127068	0.0126058	0.0191156	0.0432081	0.0432081
F54F7.2	WBGene00010064	F54F7.2	6.55836e-05	0.00172741	-0.588601	0.147454	5.64365	0.130026	0.00321529	0.0293986	0.0227841	0.0293986
F17C11.3	WBGene00000726	col-153	0.00590489	0.0716681	-0.591322	0.214791	4.33288	0.138605	0.0150984	0.0270347	0.0541042	0.0541042
R07E3.4	WBGene00011105	R07E3.4	0.0083539	0.0928724	-0.594003	0.225221	5.76128	0.166722	0.00350725	0.0725797	0.0212073	0.0725797
Y53F4B.28	WBGene00004234	ptr-20	0.000443681	0.00895905	-0.594093	0.16913	4.91343	0.117311	0.00742651	0.00685708	0.0354809	0.0354809
F54D11.1	WBGene00018811	pmt-2	0.000680955	0.0128708	-0.594275	0.174934	8.62375	0.142671	0.000172254	0.0457307	0.00921583	0.0457307
D2023.1b.2	WBGene00014300	D2023.1	0.00561791	0.0687348	-0.597999	0.21594	4.4469	0.156716	0.0212206	0.0405728	0.0487245	0.0487245
F13H10.3d.1	WBGene00008774	F13H10.3	0.00420899	0.0554627	-0.598344	0.209061	5.74392	0.157548	0.0441294	0.01855	0.0214302	0.0214302
C47A10.1	WBGene00004003	pgp-9	0.000152909	0.00359849	-0.602768	0.159197	6.36906	0.139411	0.00220229	0.0358134	0.0150142	0.0358134
T25F10.6a.1	WBGene00020808	clik-1	0.00654524	0.0778074	-0.607736	0.223503	7.70711	0.170747	0.00802518	0.0669054	0.00915633	0.0669054
C25F9.14a	WBGene00045461	C25F9.14	0.00818698	0.0914635	-0.609572	0.230527	4.19193	0.128968	0.017604	0.004264	0.0621098	0.0621098
F44F4.11	WBGene00006530	tba-4	3.70708e-06	0.000133696	-0.610358	0.131908	6.67445	0.132641	0.00155736	0.0245421	0.0127158	0.0245421
T05G5.6.1	WBGene00001155	ech-6	1.34603e-07	6.70275e-06	-0.611056	0.115896	8.3405	0.128135	0.00127719	0.0188705	0.00894232	0.0188705
Y14H12A.1	WBGene00021190	Y14H12A.1	0.00704631	0.0820219	-0.61263	0.227351	4.19084	0.142349	0.0153553	0.0218372	0.0621772	0.0621772
E04F6.6	WBGene00017126	E04F6.6	0.0017806	0.028396	-0.616891	0.197432	5.02464	0.160941	0.00668849	0.0517804	0.0333638	0.0517804
C27A2.2b	WBGene00004434	rpl-22	0.000324797	0.00685659	-0.622712	0.173232	4.96432	0.150893	0.0105234	0.032679	0.0344905	0.0344905
Y73B6BL.25	WBGene00022246	acp-7	0.000382251	0.0078723	-0.62305	0.175406	4.9488	0.153378	0.00779645	0.0383545	0.034788	0.0383545
Y105E8B.1o	WBGene00002978	lev-11	0.00275646	0.0401335	-0.630172	0.210502	5.53952	0.167428	0.0421461	0.0182197	0.0243202	0.0243202
C07A9.6	WBGene00007402	ugt-60	0.000138547	0.00331189	-0.630455	0.165441	5.02437	0.141089	0.00768743	0.0196217	0.0333688	0.0333688
C31C9.1a	WBGene00006404	tag-10	0.00225308	0.0341594	-0.630799	0.206503	7.50114	0.170545	0.00123761	0.0627278	0.00949764	0.0627278
F35H10.4.2	WBGene00006914	vha-5	0.00894047	0.0981941	-0.631378	0.241507	6.99677	0.189582	0.0118415	0.0756472	0.0110012	0.0756472
ZK430.8	WBGene00022743	mlt-7	1.81497e-08	1.08123e-06	-0.633392	0.112528	6.17327	0.126216	0.00226185	0.00506388	0.0167318	0.0167318
Y105C5B.15a	WBGene00013654	Y105C5B.15	2.47601e-06	9.34435e-05	-0.635897	0.135007	7.01247	0.143182	0.00234764	0.0249928	0.0109392	0.0249928
W09C5.6b.5	WBGene00004445	rpl-31	1.87762e-07	8.95784e-06	-0.636794	0.1222	7.10081	0.139571	0.0013251	0.0210743	0.0106101	0.0210743
F35C8.7a.2	WBGene00018037	chtl-1	0.00141544	0.0234775	-0.639478	0.20037	6.44357	0.143422	0.0458186	-0.0198911	0.0144037	0.0144037
C27H5.3b.3	WBGene00016173	fust-1	0.000790555	0.014532	-0.64077	0.190928	5.41056	0.148713	0.0282489	0.00367228	0.0264314	0.0264314
F41H10.7	WBGene00001243	elo-5	0.000692414	0.0130549	-0.643035	0.189542	8.04425	0.16716	0.0016138	0.0522756	0.00890097	0.0522756
Y67H2A.9	WBGene00014941	Y67H2A.9	4.19041e-05	0.00115589	-0.643181	0.156999	5.19357	0.142227	0.00663059	0.0160231	0.0303424	0.0303424
H18N23.2c	WBGene00019211	H18N23.2	0.00245324	0.0365847	-0.64587	0.213225	6.28437	0.179702	0.00497373	0.0632238	0.0157385	0.0632238
F35E12.7c	WBGene00009431	dct-17	0.00246087	0.0366745	-0.646851	0.213615	4.96188	0.180283	0.0219701	0.0464772	0.0345371	0.0464772
C35A11.4	WBGene00016431	C35A11.4	2.38381e-05	0.00069728	-0.648138	0.153386	5.23103	0.147702	0.00561528	0.0214811	0.0296758	0.0296758
Y22F5A.5	WBGene00003091	lys-2	1.27043e-05	0.000401545	-0.656513	0.150399	7.8547	0.156447	0.000394438	0.0335354	0.00900369	0.0335354
Y119D3B.21	WBGene00022497	Y119D3B.21	6.56984e-17	1.16805e-14	-0.658785	0.0788537	8.54892	0.132951	0.000206216	0.00323286	0.00912065	0.00912065
B0491.5.3	WBGene00007192	B0491.5	0.00236622	0.0354731	-0.663515	0.218266	7.90981	0.189243	0.0196676	0.0517922	0.00896334	0.0517922
F29C4.7b.2	WBGene00017929	grld-1	0.00188124	0.0295863	-0.664357	0.213732	5.8002	0.161074	0.047803	-0.0119745	0.020719	0.020719
ZC101.2l	WBGene00006787	unc-52	1.77659e-07	8.54756e-06	-0.6653	0.12742	6.91975	0.151378	0.0130188	0.0102197	0.011335	0.011335
F11E6.3.1	WBGene00008707	F11E6.3	1.76417e-06	6.87454e-05	-0.666127	0.139394	7.77198	0.156434	0.00520212	0.0239441	0.00908064	0.0239441
W07B8.1a	WBGene00021070	cpr-8	0.00097544	0.0172748	-0.670021	0.20319	5.56877	0.184222	0.00826733	0.0536617	0.0238745	0.0536617
C34F6.2	WBGene00000751	col-178	0.00115753	0.0198958	-0.670168	0.20626	10.0662	0.185789	4.2913e-05	0.0637718	0.0153496	0.0637718
Y11D7A.3b	WBGene00012428	Y11D7A.3	0.000794367	0.0145786	-0.672256	0.200389	6.42256	0.183765	0.0112931	0.0489406	0.0145731	0.0489406
C27D6.4c	WBGene00016162	crh-2	0.00474145	0.0606868	-0.674218	0.238738	4.46176	0.164585	0.0373834	-0.00211606	0.0481102	0.0481102
Y71D11A.3a	WBGene00022104	acsd-1	0.00257973	0.0381383	-0.677686	0.224859	4.24627	0.157407	0.0169842	0.00755271	0.0588581	0.0588581
T10B9.7	WBGene00011676	cyp-13A2	0.00136192	0.0227557	-0.67856	0.211878	5.72999	0.192004	0.00416968	0.0631685	0.0216114	0.0631685
T25B6.2	WBGene00020788	nep-22	1.51715e-12	1.56225e-10	-0.679347	0.0960491	6.731	0.143781	0.00148137	0.00517784	0.0123568	0.0123568
T15B7.1	WBGene00020516	T15B7.1	1.55413e-13	1.83251e-11	-0.6846	0.0927335	6.84157	0.148844	0.00117515	0.00912656	0.0117241	0.0117241
C24H10.5	WBGene00006861	cal-5	3.76304e-07	1.67584e-05	-0.690547	0.135919	6.24333	0.165226	0.00215289	0.0255582	0.016099	0.0255582
Y46G5A.20	WBGene00012910	Y46G5A.20	0.00337563	0.0471284	-0.692562	0.236266	4.11332	0.19789	0.01652	0.0509768	0.0672122	0.0672122
M02F4.7.1	WBGene00019738	clec-265	0.000827752	0.0150818	-0.696364	0.208284	5.55007	0.197536	0.00554983	0.0595234	0.0241582	0.0595234
W01A8.6	WBGene00012168	W01A8.6	0.0061937	0.0743799	-0.697751	0.2549	3.99999	0.17528	0.0219828	0.0145462	0.0754784	0.0754784
K08E7.9	WBGene00003995	pgp-1	2.33707e-08	1.34987e-06	-0.698071	0.124991	5.93544	0.164938	0.002823	0.0206109	0.0191382	0.0206109
F43E2.5.1	WBGene00018393	msra-1	4.63181e-06	0.000162163	-0.698926	0.152577	6.18128	0.168042	0.0182618	0.00860436	0.0166579	0.0166579
Y62E10A.13h	WBGene00013379	Y62E10A.13	0.0082597	0.092095	-0.700835	0.265341	5.78164	0.231838	0.0420501	0.0635584	0.0209499	0.0635584
C34H4.2	WBGene00016425	C34H4.2	0.00113458	0.0196198	-0.701195	0.215432	6.21403	0.203195	0.00231214	0.0673042	0.0163601	0.0673042
C04E12.4	WBGene00015434	C04E12.4	0.00011931	0.00291013	-0.701827	0.182409	4.73777	0.166634	0.0105529	0.0130295	0.0393568	0.0393568
T27A1.4.2	WBGene00020836	lgc-34	3.44223e-05	0.000971896	-0.710284	0.171481	5.23486	0.183874	0.0145013	0.0261525	0.0296075	0.0296075
F48C1.1	WBGene00018594	aman-3	1.14378e-06	4.67306e-05	-0.717742	0.147528	5.35207	0.178726	0.0051727	0.0250514	0.0274739	0.0274739
F15E6.6	WBGene00017487	F15E6.6	1.22628e-07	6.16038e-06	-0.721244	0.136353	5.57683	0.164906	0.00413459	0.00692625	0.0237536	0.0237536
F15G9.4c	WBGene00001863	him-4	0.00686396	0.0802276	-0.722009	0.267077	5.00754	0.241985	0.0157949	0.0912002	0.033679	0.0912002
F41E6.2	WBGene00001694	grd-5	2.58132e-06	9.67405e-05	-0.732635	0.155827	7.07533	0.190164	0.000913378	0.0355096	0.0107018	0.0355096
F08G5.5a	WBGene00008583	ugt-65	0.00483338	0.0613801	-0.732691	0.26001	4.23225	0.242177	0.0323401	0.0690677	0.0596764	0.0690677
F25E5.8a.2	WBGene00017789	F25E5.8	1.98397e-05	0.000594852	-0.733512	0.171916	5.03564	0.196878	0.00920785	0.0351249	0.0331627	0.0351249
W10G11.16b	WBGene00021146	lgc-45	0.00206664	0.0318304	-0.734994	0.238597	5.08157	0.185409	0.05306	-0.0238795	0.0323327	0.0323327
ZK896.1	WBGene00014132	ZK896.1	0.00883657	0.0974291	-0.735693	0.28098	3.7778	0.207771	0.0230876	0.0336599	0.0953369	0.0953369
Y116F11B.3	WBGene00003959	pcp-4	1.12348e-08	6.89139e-07	-0.740976	0.129746	5.71369	0.178658	0.00342489	0.0140063	0.0218263	0.0218263
Y77E11A.15	WBGene00000680	col-106	0.00345033	0.0478775	-0.744427	0.25455	10.0097	0.244007	4.55489e-05	0.0971483	0.0148991	0.0971483
F53C11.1a	WBGene00009971	F53C11.1	6.79862e-05	0.00178656	-0.747487	0.187659	6.01603	0.20988	0.0306812	0.0221425	0.0182737	0.0221425
B0286.4d.2	WBGene00003825	ntl-2	0.00183869	0.0290778	-0.748111	0.240155	6.45515	0.191596	0.0722	-0.0425821	0.0143114	0.0143114
C18H7.11	WBGene00044457	C18H7.11	1.28654e-05	0.000405509	-0.749453	0.171799	5.11167	0.203922	0.00585527	0.038417	0.0317951	0.038417
W05E7.3	WBGene00001702	grd-13	0.000122237	0.00296878	-0.750331	0.195318	4.51912	0.180461	0.0113191	0.00313322	0.0459044	0.0459044
F22H10.6	WBGene00017730	F22H10.6	3.63145e-06	0.000131176	-0.750412	0.162026	5.5999	0.200439	0.00424947	0.0351292	0.0234124	0.0351292
F46E10.1c	WBGene00018488	acs-1	2.95094e-05	0.000845776	-0.753549	0.180395	7.16395	0.209401	0.0130828	0.0357307	0.0103939	0.0357307
K09F5.2	WBGene00006925	vit-1	1.21008e-05	0.000384068	-0.755809	0.172726	11.4075	0.207175	1.33937e-05	0.0447381	0.0365101	0.0447381
F57B9.6b.1	WBGene00002083	inf-1	0.00705638	0.0820553	-0.758253	0.281442	5.8631	0.254414	0.0988521	0.00355974	0.0199622	0.0199622
C44C1.5a.1	WBGene00016644	abhd-3.2	0.00871461	0.0962244	-0.758518	0.289174	4.31108	0.272951	0.0669265	0.0585059	0.0552532	0.0585059
F53B3.6	WBGene00018744	F53B3.6	0.000915333	0.0164276	-0.761073	0.229561	4.18185	0.180401	0.0163107	-0.00802189	0.0627369	0.0627369
Y47G6A.33	WBGene00045399	Y47G6A.33	9.02417e-08	4.67798e-06	-0.765981	0.143298	6.12496	0.200659	0.00264693	0.0281547	0.0171866	0.0281547
F18E2.1a.2	WBGene00008936	papl-1	0.00031907	0.00676707	-0.769677	0.21384	5.61701	0.232594	0.011818	0.0567736	0.0231639	0.0567736
F18E2.1b.2	WBGene00008936	papl-1	0.00031907	0.00676707	-0.769677	0.21384	5.61701	0.232594	0.011818	0.0567736	0.0231639	0.0567736
T08B1.3	WBGene00000111	alh-5	2.64287e-08	1.51496e-06	-0.772942	0.138929	5.52541	0.190001	0.00441222	0.00904924	0.0245395	0.0245395
D1025.2	WBGene00008354	gcsh-1	3.75285e-08	2.09322e-06	-0.777394	0.14129	5.47953	0.188789	0.00467259	0.00468534	0.0252718	0.0252718
C40H1.7a	WBGene00008042	C40H1.7	0.00138079	0.0230202	-0.779166	0.243593	4.40592	0.253335	0.0125847	0.0764218	0.0505173	0.0764218
F26F12.1	WBGene00000713	col-140	0.00180442	0.0286354	-0.780973	0.250258	10.2987	0.258131	3.64883e-05	0.0939074	0.0174687	0.0939074
C46F2.1	WBGene00016714	C46F2.1	2.19341e-05	0.000646574	-0.781012	0.184017	4.69511	0.215899	0.0103444	0.0307867	0.0404491	0.0404491
Y58A7A.1b	WBGene00021975	Y58A7A.1	0.000149092	0.00351595	-0.784359	0.206814	4.89035	0.226382	0.0282128	0.0240583	0.0359454	0.0359454
E01A2.7	WBGene00017089	poml-2	0.000323886	0.00685007	-0.793766	0.220772	4.30846	0.227542	0.0177172	0.0304357	0.0553934	0.0553934
T15B7.4	WBGene00000715	col-142	0.000543948	0.0106163	-0.799156	0.231095	6.63905	0.255681	0.00164231	0.0784652	0.0129521	0.0784652
T11B7.4a	WBGene00001132	alp-1	0.000941724	0.0167821	-0.802015	0.242492	4.58398	0.263531	0.0421358	0.046068	0.0436883	0.046068
Y82E9BR.3.4	WBGene00022336	Y82E9BR.3	0.00502758	0.0631416	-0.804356	0.286731	4.70755	0.282388	0.0831993	0.0271649	0.0401229	0.0401229
Y38H6C.1b.5	WBGene00012615	dct-16	1.22195e-06	4.93925e-05	-0.805365	0.165985	5.37571	0.221213	0.0142805	0.0190058	0.0270459	0.0270459
ZC101.2p	WBGene00006787	unc-52	0.0010291	0.0180495	-0.80549	0.245393	5.18503	0.266905	0.058073	0.0322535	0.0304939	0.0322535
T19C3.1	WBGene00020559	best-17	0.00133495	0.0224203	-0.809693	0.25237	4.14702	0.273109	0.0217838	0.073752	0.0649645	0.073752
F13B6.2	WBGene00017417	F13B6.2	2.10025e-07	9.89551e-06	-0.817812	0.157567	5.16457	0.211587	0.00638468	0.00729266	0.0308565	0.0308565
Y45G5AM.1b	WBGene00003704	nhr-114	1.99254e-09	1.37824e-07	-0.818312	0.136421	6.03526	0.213159	0.00984087	0.00549411	0.0180753	0.0180753
W05B2.6	WBGene00000667	col-92	2.08013e-06	8.0233e-05	-0.81931	0.172651	5.63379	0.23715	0.0118143	0.032898	0.0229237	0.032898
K10D11.1	WBGene00010745	dod-17	1.55189e-05	0.000477247	-0.821835	0.190187	4.64532	0.217666	0.0124331	0.00636927	0.0418235	0.0418235
C17H12.8.1	WBGene00015933	C17H12.8	1.73386e-11	1.54735e-09	-0.831766	0.123649	7.78971	0.225897	0.000728632	0.0222049	0.00906248	0.0222049
C12D12.1c	WBGene00015713	C12D12.1	7.36651e-05	0.00192247	-0.831889	0.209854	6.69122	0.260459	0.00773261	0.0583257	0.0126069	0.0583257
JC8.3c.4	WBGene00004424	rpl-12	3.40976e-08	1.93506e-06	-0.83838	0.151909	5.47273	0.223943	0.00923142	0.00711637	0.0253829	0.0253829
C34H4.1a	WBGene00016424	C34H4.1	1.21465e-12	1.27382e-10	-0.83996	0.118243	6.01532	0.225711	0.00269086	0.0148729	0.0182811	0.0182811
B0310.5	WBGene00015141	ugt-46	6.97957e-06	0.000236009	-0.842165	0.187385	6.49338	0.254908	0.00176708	0.0509024	0.0140119	0.0509024
C11E4.1	WBGene00007516	gpx-5	2.19727e-21	6.0245e-19	-0.843405	0.088824	7.02518	0.218202	0.00094467	0.00505881	0.0108899	0.0108899
F56B3.1	WBGene00000677	col-103	0.000185103	0.0042124	-0.845623	0.226192	8.92783	0.275919	0.000162275	0.0765817	0.00978308	0.0765817
C44C1.5a.2	WBGene00016644	abhd-3.2	5.24089e-13	5.76169e-11	-0.850266	0.117783	6.2031	0.227376	0.00435064	0.00876243	0.0164587	0.0164587
F11H8.3	WBGene00000597	col-8	1.65412e-07	8.07788e-06	-0.856926	0.163707	10.0964	0.252457	4.64346e-05	0.0401534	0.0155999	0.0401534
F38H4.9.3	WBGene00002363	let-92	0.000211265	0.00472739	-0.857215	0.231358	6.70798	0.284677	0.0224654	0.0578243	0.0125001	0.0578243
K09E10.1c	WBGene00019579	oac-57	0.00436328	0.0568376	-0.859779	0.30161	3.66821	0.265154	0.029224	0.0250115	0.107229	0.107229
D1086.3	WBGene00008390	D1086.3	1.97374e-05	0.000592563	-0.862035	0.201984	7.30419	0.271888	0.00078086	0.0604154	0.00996916	0.0604154
B0365.6.3	WBGene00007153	clec-41	3.28077e-05	0.00093209	-0.863754	0.207981	6.33679	0.275729	0.0154959	0.0493882	0.0152867	0.0493882
C05D12.3a.2	WBGene00014666	C05D12.3	1.16975e-06	4.76208e-05	-0.866122	0.178189	6.70417	0.263151	0.020716	0.0269109	0.0125242	0.0269109
F01D5.1	WBGene00008492	F01D5.1	6.96363e-06	0.00023582	-0.86682	0.19285	4.80664	0.270042	0.0105701	0.0452163	0.0377333	0.0452163
F42C5.7	WBGene00001713	grl-4	3.27478e-12	3.25433e-10	-0.871734	0.125152	5.86565	0.24336	0.00356221	0.0156677	0.0199324	0.0199324
C52D10.3b	WBGene00016877	C52D10.3	2.22771e-09	1.5316e-07	-0.871822	0.145783	5.42944	0.24184	0.00577225	0.0115	0.0261068	0.0261068
K10B2.2a.1	WBGene00019605	ctsa-1	3.71854e-10	2.79283e-08	-0.876718	0.13993	6.62869	0.254087	0.00213365	0.027237	0.0130229	0.027237
T11B7.3a	WBGene00000692	col-118	2.13846e-06	8.22044e-05	-0.880823	0.185832	5.48573	0.272257	0.0266294	0.022749	0.025171	0.025171
AC3.8	WBGene00007073	ugt-2	0.000292633	0.00627658	-0.884601	0.244248	4.92076	0.306344	0.00789906	0.0815865	0.0353355	0.0815865
W10G11.3	WBGene00021136	W10G11.3	0.00537476	0.0664025	-0.890143	0.319773	5.21816	0.360412	0.00607116	0.147311	0.0299054	0.147311
F23B2.11.2	WBGene00003958	pcp-3	6.0269e-18	1.25829e-15	-0.893638	0.103526	6.98214	0.244625	0.00501566	0.00129446	0.0110607	0.0110607
C06E2.1	WBGene00015527	C06E2.1	0.00491043	0.062116	-0.895491	0.318357	3.59592	0.290293	0.0360758	0.0260761	0.115951	0.115951
F42A10.3	WBGene00018340	anmt-2	2.39325e-05	0.000699142	-0.897353	0.212409	6.29279	0.295714	0.00183969	0.0658369	0.0156652	0.0658369
M03B6.1	WBGene00010833	M03B6.1	0.00176031	0.0281423	-0.897831	0.287035	3.78968	0.26604	0.0294469	0.000815251	0.0941368	0.0941368
ZK6.11a.1	WBGene00022645	ZK6.11	1.18618e-06	4.80319e-05	-0.899403	0.185141	8.62375	0.28381	0.000271207	0.0511446	0.00921582	0.0511446
T20D4.5	WBGene00020611	T20D4.5	1.20429e-05	0.000382766	-0.90136	0.20594	4.3976	0.287872	0.0127164	0.042455	0.0509005	0.0509005
C08A9.1	WBGene00004932	sod-3	0.00657111	0.0780066	-0.903071	0.332276	3.50027	0.280889	0.0369341	0.00835066	0.128677	0.128677
F01F1.6.2	WBGene00000115	alh-9	2.90126e-05	0.000833636	-0.904894	0.216426	7.31964	0.301858	0.00975294	0.0605072	0.00992695	0.0605072
F14F7.1	WBGene00000673	col-98	0.00022652	0.00503376	-0.907781	0.246182	8.96446	0.319946	0.000136985	0.0907712	0.00987214	0.0907712
F11G11.11	WBGene00000609	col-20	1.30081e-06	5.21172e-05	-0.908799	0.187783	10.1723	0.290089	4.30045e-05	0.0528505	0.0162604	0.0528505
T21B6.2	WBGene00011879	pho-7	3.83288e-06	0.000137796	-0.909246	0.196796	4.54069	0.267809	0.0129564	0.0117811	0.0451367	0.0451367
ZK218.5	WBGene00013939	ZK218.5	0.00111252	0.0192676	-0.909571	0.278975	3.81412	0.330911	0.0250182	0.0783752	0.0917221	0.0917221
C33A12.6a	WBGene00007885	ugt-21	1.07932e-14	1.44483e-12	-0.912025	0.117992	6.01491	0.264057	0.00259781	0.0155523	0.0182854	0.0182854
K10D3.6	WBGene00010740	K10D3.6	0.000210463	0.00471604	-0.914759	0.246824	4.25855	0.324142	0.018353	0.0730304	0.0581531	0.0730304
Y54G11A.7	WBGene00013216	Y54G11A.7	3.75846e-15	5.41337e-13	-0.921067	0.117143	6.02772	0.257019	0.00243101	0.00070578	0.0181529	0.0181529
Y71F9B.13a	WBGene00022131	Y71F9B.13	0.00538628	0.0665087	-0.927994	0.333454	4.93542	0.391782	0.0253876	0.1414	0.0350477	0.1414
Y38F1A.6.1	WBGene00012608	hphd-1	5.06361e-12	4.86214e-10	-0.931906	0.134985	6.85555	0.273387	0.0156805	0.000384557	0.0116509	0.0116509
T01B10.2.2	WBGene00001703	grd-14	5.891e-05	0.00157349	-0.935337	0.232837	4.50915	0.327512	0.0186132	0.0627064	0.0462699	0.0627064
F35E8.8	WBGene00001786	gst-38	0.00233295	0.0351363	-0.937485	0.307957	3.64575	0.32191	0.0323952	0.0404128	0.109861	0.109861
Y40D12A.2.1	WBGene00021503	ctsa-2	3.99363e-14	4.99358e-12	-0.938949	0.12418	6.99049	0.282992	0.00205744	0.0210735	0.0110265	0.0210735
F58G6.7	WBGene00010277	F58G6.7	5.93525e-10	4.35705e-08	-0.938972	0.151639	5.78186	0.292094	0.00358334	0.0309084	0.0209471	0.0309084
H11E01.2	WBGene00019187	H11E01.2	0.000671697	0.0127276	-0.93993	0.276379	4.00669	0.356703	0.0215809	0.0929967	0.0749578	0.0929967
T25C8.2.1	WBGene00000067	act-5	2.43296e-07	1.12763e-05	-0.944729	0.182988	7.31332	0.307935	0.0121801	0.0380468	0.00994412	0.0380468
C08E8.10	WBGene00077692	C08E8.10	0.00344539	0.0478382	-0.945338	0.323201	3.57666	0.351333	0.0382859	0.0657563	0.118402	0.118402
M03B6.2	WBGene00010834	mct-3	1.00488e-17	2.0418e-15	-0.946658	0.110418	6.25998	0.279726	0.00233619	0.0112604	0.0159521	0.0159521
F15A2.5	WBGene00001164	efn-3	1.72164e-06	6.73183e-05	-0.953272	0.199278	4.47627	0.275062	0.0120395	-0.00898507	0.0475283	0.0475283
W05H7.4e	WBGene00021047	zfp-3	0.000325922	0.00687396	-0.962935	0.267945	5.92146	0.364327	0.0745813	0.0331107	0.0192938	0.0331107
F59A1.10	WBGene00010296	dgat-2	4.27694e-12	4.15941e-10	-0.964488	0.139222	5.89995	0.302331	0.00285193	0.0262221	0.0195365	0.0262221
C47B2.6b	WBGene00008132	gale-1	0.00411831	0.054552	-0.965293	0.336462	6.0275	0.415385	0.0293307	0.140479	0.0181551	0.140479
T25C8.2.2	WBGene00000067	act-5	8.31142e-08	4.35813e-06	-0.967763	0.180545	8.03391	0.320086	0.00365124	0.0452435	0.00890396	0.0452435
ZC434.9b	WBGene00013895	ZC434.9	0.000100118	0.00249277	-0.970347	0.249427	5.04366	0.357128	0.0185368	0.0747838	0.0330166	0.0747838
F23A7.4.2	WBGene00009069	F23A7.4	0.00442054	0.0573111	-0.979497	0.344108	3.54516	0.341142	0.0550866	0.0115606	0.122529	0.122529
C50F4.8	WBGene00008233	C50F4.8	1.33971e-09	9.46825e-08	-0.9803	0.161697	5.08063	0.311556	0.00686961	0.0222044	0.0323495	0.0323495
T01B10.1	WBGene00001693	grd-4	0.000123595	0.00299855	-0.985517	0.25672	4.0524	0.370459	0.0174069	0.0814506	0.0715154	0.0814506
C23H5.8a	WBGene00016027	C23H5.8	1.09046e-07	5.58909e-06	-0.986879	0.185819	6.94827	0.333613	0.00147608	0.050317	0.0112056	0.050317
C50A2.3b	WBGene00016797	C50A2.3	2.95702e-06	0.000109242	-0.99746	0.213416	4.45264	0.322402	0.0198349	0.0100701	0.0484848	0.0484848
M02F4.8.2	WBGene00000175	aqp-7	5.12935e-06	0.00017713	-0.997704	0.218822	6.97704	0.356084	0.00392994	0.0678949	0.0110819	0.0678949
K08E3.7b.2	WBGene00003967	pdr-1	0.00477145	0.0608996	-1.00351	0.355592	4.18049	0.413946	0.126846	0.0129518	0.0628223	0.0628223
C15H9.7	WBGene00015802	kynu-1	5.17349e-09	3.3638e-07	-1.00441	0.171944	6.78886	0.33813	0.00127874	0.0430685	0.012014	0.0430685
T10G3.3	WBGene00011694	T10G3.3	3.43768e-10	2.60771e-08	-1.00445	0.160005	5.11139	0.324379	0.00660204	0.0205264	0.0318002	0.0318002
F45D3.3	WBGene00009723	F45D3.3	2.71125e-15	3.95512e-13	-1.00903	0.127669	6.04049	0.325004	0.00313357	0.0213154	0.0180218	0.0213154
C05D12.3a.1	WBGene00014666	C05D12.3	0.000124273	0.00301179	-1.01212	0.263741	5.36062	0.390785	0.0394633	0.0648756	0.0273181	0.0648756
C55A6.4	WBGene00008333	C55A6.4	0.0015859	0.0258526	-1.03344	0.327195	4.23497	0.448869	0.0176073	0.142978	0.0595163	0.142978
H23N18.1	WBGene00019232	ugt-13	2.8572e-13	3.28391e-11	-1.03406	0.141634	5.45912	0.330239	0.00448256	0.00733584	0.0256075	0.0256075
Y47G6A.19a	WBGene00021645	Y47G6A.19	3.763e-09	2.48938e-07	-1.04377	0.177082	5.53384	0.354911	0.0226287	0.0124635	0.0244082	0.0244082
Y51A2D.18	WBGene00013083	Y51A2D.18	8.31363e-11	6.83008e-09	-1.05754	0.162828	5.07614	0.357484	0.0073396	0.0201199	0.03243	0.03243
C09F12.1.1	WBGene00000522	clc-1	0.0088928	0.0978595	-1.05836	0.404551	3.97423	0.410566	0.167971	-0.0748142	0.0775204	0.0775204
C49F5.9	WBGene00045316	C49F5.9	0.00104929	0.0183682	-1.05859	0.323041	3.58464	0.369499	0.0391527	0.00248881	0.11738	0.11738
ZK6.10a	WBGene00022644	dod-19	8.03987e-38	6.30908e-35	-1.06004	0.0824602	7.90429	0.342006	0.00123253	0.00488987	0.00896699	0.00896699
Y22D7AL.11	WBGene00021249	Y22D7AL.11	0.00333086	0.0466463	-1.06113	0.36149	3.3863	0.44539	0.0502241	0.084265	0.145789	0.145789
C07A9.4	WBGene00003571	ncx-6	1.86295e-07	8.92274e-06	-1.06275	0.203884	4.44047	0.354424	0.0133573	0.0061344	0.0489958	0.0489958
F35B12.7.1	WBGene00003762	nlp-24	1.07701e-13	1.28322e-11	-1.08205	0.14561	6.20943	0.376689	0.00596735	0.0258362	0.0164015	0.0258362
F18E3.11	WBGene00017567	F18E3.11	1.16322e-07	5.88709e-06	-1.08628	0.20499	4.57357	0.404427	0.0113982	0.0516333	0.0440262	0.0516333
F18E3.12	WBGene00045275	F18E3.12	4.08584e-06	0.000145511	-1.08718	0.235985	4.13974	0.38441	0.0180912	0.0191889	0.0654425	0.0654425
F52F10.4a	WBGene00018708	oac-32	0.0045297	0.0585363	-1.10498	0.389257	3.64338	0.404552	0.117138	-0.06932	0.110143	0.110143
F57B1.4.2	WBGene00000733	col-160	4.91697e-06	0.000170572	-1.10915	0.242792	5.56892	0.422646	0.0645499	0.00242871	0.0238722	0.0238722
DH11.2.2	WBGene00008436	DH11.2	4.30344e-09	2.82229e-07	-1.11768	0.190338	4.93488	0.380685	0.0192845	-0.0118809	0.0350582	0.0350582
Y42A5A.3	WBGene00012778	Y42A5A.3	0.00223433	0.0338978	-1.12149	0.366839	3.40541	0.535344	0.0590952	0.138431	0.142761	0.142761
W05B2.1	WBGene00000669	col-94	2.8691e-25	1.07036e-22	-1.12646	0.108459	7.67903	0.394792	0.000661712	0.0169833	0.00919382	0.0169833
K08F4.7	WBGene00001752	gst-4	6.08703e-14	7.40762e-12	-1.12734	0.150187	5.31527	0.39357	0.0056816	0.00969827	0.0281528	0.0281528
C17C3.15	WBGene00015896	C17C3.15	8.56581e-05	0.00219354	-1.13078	0.287878	3.77594	0.422527	0.0287847	0.0198754	0.0955255	0.0955255
F52E4.4	WBGene00006670	twk-16	0.000400993	0.00821367	-1.1393	0.321888	4.05676	0.513736	0.0222776	0.13314	0.0711964	0.13314
F18E3.13	WBGene00045276	F18E3.13	2.69905e-06	0.000100857	-1.14748	0.244535	4.74497	0.466768	0.0133303	0.0763657	0.0391793	0.0763657
T01B10.2.1	WBGene00001703	grd-14	0.00382078	0.0516327	-1.14856	0.39707	3.48828	0.504499	0.106124	0.0298013	0.130373	0.130373
B0410.3	WBGene00015172	B0410.3	2.34691e-05	0.000688255	-1.15031	0.272003	4.95598	0.485749	0.00962762	0.101351	0.0346499	0.101351
Y54G9A.4	WBGene00013207	zipt-2.3	0.00113856	0.0196588	-1.15033	0.353529	4.02136	0.546953	0.0333258	0.154148	0.073832	0.154148
K02D7.3a	WBGene00000675	col-101	0.000965875	0.0171588	-1.15815	0.350925	9.79464	0.550173	0.00051788	0.184205	0.0133882	0.184205
F23D12.11	WBGene00194674	F23D12.11	0.00325013	0.0457976	-1.16273	0.395079	6.77715	0.592887	0.00175885	0.232372	0.0120813	0.232372
C35A5.3	WBGene00007947	C35A5.3	2.89698e-06	0.000107198	-1.16518	0.249077	4.64958	0.481739	0.0119882	0.0810705	0.0417013	0.0810705
ZK1193.1	WBGene00000608	col-19	1.0081e-19	2.46682e-17	-1.17836	0.12966	9.59172	0.436732	7.45019e-05	0.025143	0.0122232	0.025143
F19B2.5.2	WBGene00008944	F19B2.5	0.00300217	0.0429958	-1.18362	0.398859	5.8931	0.611192	0.00368506	0.234947	0.0196147	0.234947
F11E6.3.2	WBGene00008707	F11E6.3	0.000118495	0.00289334	-1.1871	0.3084	7.68692	0.536895	0.0126665	0.129999	0.00918301	0.129999
Y39B6A.21	WBGene00012680	Y39B6A.21	6.25181e-05	0.00165433	-1.19911	0.299546	4.43451	0.539035	0.0149675	0.119624	0.0492508	0.119624
C53A3.2	WBGene00016892	C53A3.2	6.19219e-12	5.87149e-10	-1.20597	0.17541	5.46165	0.473233	0.00743182	0.0387212	0.0255656	0.0387212
C49F5.1.1	WBGene00008205	sams-1	1.02067e-06	4.22315e-05	-1.21643	0.248879	4.94833	0.513861	0.0581142	0.0293277	0.0347971	0.0347971
F58G6.3	WBGene00010274	F58G6.3	9.67331e-08	5.00308e-06	-1.2225	0.229243	5.21164	0.511412	0.00810424	0.0707242	0.0300214	0.0707242
F38A3.1	WBGene00000657	col-81	8.24454e-08	4.33305e-06	-1.23972	0.231218	5.54695	0.525228	0.0043568	0.0758362	0.0242059	0.0758362
C39B5.5	WBGene00016523	C39B5.5	0.00628756	0.0752574	-1.24572	0.455907	2.94266	0.596994	0.0733522	0.090959	0.238425	0.238425
F22E5.1	WBGene00017703	F22E5.1	1.91941e-15	2.912e-13	-1.26429	0.159102	5.14331	0.483546	0.00673678	-0.00171894	0.0312333	0.0312333
C27C7.3	WBGene00003664	nhr-74	0.000144412	0.00342333	-1.26565	0.333024	4.74215	0.613651	0.013795	0.152563	0.0392487	0.152563
C15C8.3a	WBGene00007605	hrg-7	0.000754188	0.0139746	-1.26982	0.376904	8.72773	0.654202	0.000235718	0.212849	0.00937647	0.212849
F10D2.5	WBGene00017331	ugt-40	0.00101125	0.0177981	-1.28161	0.389858	3.29923	0.65443	0.0675373	0.134553	0.160447	0.160447
T19H12.9	WBGene00020592	ugt-12	1.34334e-29	7.4562e-27	-1.2863	0.113852	6.15657	0.508351	0.00255632	0.0124216	0.0168873	0.0168873
Y67D8C.8	WBGene00022072	cpg-9	9.74821e-13	1.03664e-10	-1.28923	0.180715	5.99723	0.537821	0.00411438	0.0448727	0.0184707	0.0448727
F09E10.3	WBGene00000988	dhs-25	2.20466e-18	4.91877e-16	-1.29963	0.148592	6.52544	0.533209	0.00173157	0.0313879	0.0137673	0.0313879
R07E5.4	WBGene00011112	R07E5.4	1.59409e-23	5.10939e-21	-1.3001	0.130068	5.71021	0.524339	0.00350397	0.0180709	0.0218726	0.0218726
F54E2.1	WBGene00018823	F54E2.1	5.07821e-27	2.3113e-24	-1.33633	0.124146	7.7191	0.554231	0.000636235	0.022482	0.0091412	0.022482
F36H1.5b.2	WBGene00009493	hrg-4	0.00160508	0.0260905	-1.34455	0.426167	4.20633	0.662492	0.211201	-0.0610174	0.0612269	0.0612269
T10H9.5a	WBGene00004062	pmp-5	3.97663e-22	1.19074e-19	-1.38355	0.143051	6.42306	0.59882	0.0028257	0.0278698	0.014569	0.0278698
Y9C9A.8	WBGene00021178	Y9C9A.8	0.000890267	0.0160283	-1.39142	0.418713	3.0844	0.78528	0.0594333	0.196149	0.203547	0.203547
F25C8.1	WBGene00009104	F25C8.1	3.80706e-05	0.00106173	-1.41156	0.342704	3.5146	0.644155	0.0494894	0.00851655	0.12668	0.12668
C23H5.8b.1	WBGene00016027	C23H5.8	0.00731272	0.0842611	-1.41847	0.528835	3.61294	0.608717	0.305667	-0.299294	0.113832	0.113832
W07B8.1b	WBGene00021070	cpr-8	0.00476049	0.0607937	-1.4254	0.504958	4.26393	0.659048	0.324627	-0.26273	0.0578471	0.0578471
F54D12.3	WBGene00000008	aat-7	0.00778206	0.0881954	-1.47019	0.552417	2.66549	0.987305	0.132695	0.290885	0.325052	0.325052
F40H3.2.1	WBGene00018250	F40H3.2	4.02434e-06	0.000143771	-1.47519	0.319989	3.96886	0.775727	0.040102	0.113488	0.0779543	0.113488
C23H5.8b.2	WBGene00016027	C23H5.8	1.04663e-07	5.37654e-06	-1.48577	0.279362	4.93138	0.755907	0.0180249	0.0990401	0.0351266	0.0990401
F37B1.3	WBGene00001762	gst-14	0.00308421	0.0440599	-1.49653	0.505718	2.87085	0.85862	0.125265	0.10816	0.25836	0.25836
F57B1.4.1	WBGene00000733	col-160	1.21948e-13	1.4454e-11	-1.501	0.202437	8.89851	0.725079	0.000332647	0.0611387	0.00971517	0.0611387
F41F3.4	WBGene00000712	col-139	7.65298e-08	4.05021e-06	-1.50925	0.280784	5.9148	0.777956	0.0047583	0.113501	0.0193685	0.113501
C49F5.1.2	WBGene00008205	sams-1	5.52556e-41	5.46719e-38	-1.51134	0.112731	8.03564	0.700496	0.000596223	0.018466	0.00890344	0.018466
ZK652.4.3	WBGene00004449	rpl-35	8.92218e-05	0.00225853	-1.52084	0.38815	4.55393	0.734231	0.18131	-0.13088	0.0446813	0.0446813
C39D10.8a	WBGene00016535	C39D10.8	9.26413e-06	0.000304219	-1.53428	0.346052	4.4331	0.849906	0.126743	0.0528848	0.0493114	0.0528848
C32H11.9	WBGene00007872	C32H11.9	3.5099e-10	2.65365e-08	-1.54381	0.24605	6.00363	0.787657	0.013655	0.0771557	0.0184034	0.0771557
F58G6.9b.2	WBGene00044107	F58G6.9	1.478e-11	1.32421e-09	-1.57041	0.232651	4.72876	0.804806	0.0191719	0.0620182	0.0395814	0.0620182
Y73E7A.3c	WBGene00022270	Y73E7A.3	0.00843367	0.0936529	-1.57229	0.596878	4.06771	1.09273	0.463992	-0.0251262	0.0704036	0.0704036
C32H11.10	WBGene00007873	dod-21	1.61575e-16	2.70364e-14	-1.5735	0.190782	6.79671	0.786443	0.00345716	0.0511393	0.0119695	0.0511393
C55B7.4a	WBGene00016943	acdh-1	1.27975e-10	1.02909e-08	-1.58561	0.246613	8.1915	0.827232	0.000412349	0.0908146	0.00889079	0.0908146
M18.1a	WBGene00000703	col-129	1.58777e-12	1.62761e-10	-1.61607	0.228691	6.29736	0.84626	0.00277589	0.0756733	0.0156255	0.0756733
R193.2	WBGene00020128	R193.2	1.1748e-07	5.92794e-06	-1.66643	0.314576	7.41474	0.951845	0.000885515	0.147552	0.0096868	0.147552
T12B5.14	WBGene00050913	T12B5.14	0.00701055	0.0817311	-1.66739	0.618388	2.44995	0.87996	0.160383	-0.102999	0.413222	0.413222
T05E12.6a	WBGene00011487	T05E12.6	5.44651e-70	1.54933e-66	-1.67576	0.0947547	6.84052	0.852393	0.001738	0.0106867	0.0117297	0.0117297
Y73B6BL.24	WBGene00022245	acp-6	8.53632e-06	0.000282767	-1.70728	0.38355	8.87903	1.05098	0.000242556	0.220423	0.00967165	0.220423
C29E4.7	WBGene00016204	gsto-1	9.42631e-05	0.0023651	-1.74427	0.446687	4.92547	1.15218	0.011486	0.287808	0.0352426	0.287808
Y37H2A.14	WBGene00045416	Y37H2A.14	0.0025918	0.03825	-1.77108	0.587928	5.07977	1.35581	0.0154483	0.503041	0.0323649	0.503041
T10B5.8	WBGene00020394	T10B5.8	1.7921e-15	2.75559e-13	-1.77308	0.22289	4.49061	1.00276	0.0141934	0.0603266	0.0469695	0.0603266
F37B4.7	WBGene00018138	folt-2	9.87577e-53	1.60531e-49	-1.7778	0.116323	8.0079	0.964409	0.000568652	0.0197278	0.00891282	0.0197278
C39D10.8c	WBGene00016535	C39D10.8	3.82016e-05	0.00106408	-1.78331	0.433043	4.19424	1.17909	0.135824	0.145466	0.0619667	0.145466
T05E12.7a	WBGene00005444	srh-237	0.000499289	0.00989749	-1.78673	0.513261	3.25386	1.23011	0.226479	0.114002	0.168677	0.168677
C39D10.8b	WBGene00016535	C39D10.8	0.00864666	0.0955668	-1.84082	0.701074	3.22355	1.46929	0.562837	0.00304234	0.17442	0.17442
B0024.2	WBGene00000723	col-150	8.17055e-12	7.58928e-10	-1.89404	0.277088	4.21259	1.16835	0.0188794	0.096287	0.0608481	0.096287
C09G5.5	WBGene00000656	col-80	2.75765e-06	0.00010271	-1.90946	0.407301	9.13681	1.29289	0.000240841	0.2486	0.0103561	0.2486
F58G6.9a	WBGene00044107	F58G6.9	0.00206729	0.0318304	-1.91727	0.62241	3.16921	1.37461	0.395854	-0.0560521	0.185237	0.185237
C34F6.3	WBGene00000752	col-179	9.96983e-06	0.000323657	-2.02348	0.458025	8.01982	1.48008	0.000949336	0.313731	0.00890853	0.313731
T19C9.8	WBGene00011844	T19C9.8	1.70725e-27	8.26636e-25	-2.09605	0.192932	4.65581	1.3394	0.0143097	0.01241	0.0415243	0.0415243
K08D12.6	WBGene00019540	K08D12.6	7.07995e-16	1.11116e-13	-2.12425	0.263256	7.85911	1.43689	0.000652452	0.103303	0.00900014	0.103303
F58E6.7	WBGene00010256	hrg-3	0.00701707	0.0817652	-2.20712	0.818653	3.54955	2.26564	0.101851	0.903438	0.121945	0.903438
K09A11.2	WBGene00010705	cyp-14A1	7.90234e-09	4.99538e-07	-2.35559	0.40821	3.26635	1.70029	0.0835842	-0.0390259	0.166369	0.166369
C04F5.7	WBGene00015449	ugt-63	2.41076e-05	0.000702453	-2.3694	0.56107	5.09788	2.06197	0.0185105	0.453689	0.0320409	0.453689
C31G12.2	WBGene00007851	clec-245	0.00323862	0.0457432	-2.37038	0.805119	1.92856	1.80318	0.241556	-0.0945855	0.730769	0.730769
F57B1.3	WBGene00000732	col-159	1.28549e-90	5.85078e-87	-2.42771	0.120264	6.14965	1.78298	0.00474293	0.013814	0.0169522	0.0169522
D2023.7	WBGene00000731	col-158	8.2793e-16	1.29049e-13	-2.51529	0.312458	4.50407	2.01515	0.0326502	0.113795	0.046459	0.113795
F46F2.3	WBGene00009787	F46F2.3	2.20307e-06	8.4403e-05	-2.5832	0.545688	7.12383	2.35921	0.00205645	0.444607	0.0105295	0.444607
ZC513.8	WBGene00000620	col-43	8.67678e-17	1.50731e-14	-2.62387	0.315308	4.40846	2.18472	0.0247461	0.124383	0.0504021	0.124383
W05B2.5	WBGene00000668	col-93	3.5402e-12	3.5028e-10	-2.63536	0.378948	8.94564	2.25586	0.000321323	0.215081	0.0098258	0.215081
[truncated: 91 more rows]

## Sheet: MBAo1 inf 12h L4
Table: Differentially expressed genes as determined by Kallisto and Sleuth (pval<0.01, qval<0.1)
target_id	WormBase Gene ID	Public Name	pval	qval	b	se_b	mean_obs	var_obs	tech_var	sigma_sq	smooth_sigma_sq	final_sigma_sq
Y71H2AR.2	WBGene00022189	Y71H2AR.2	6.30795e-15	2.68807e-12	7.7559	0.994648	5.26556	18.9366	0.0307985	1.15639	0.200439	1.15639
F14F9.3	WBGene00017466	F14F9.3	1.57459e-09	2.9989e-07	7.60653	1.26008	5.41643	18.7868	0.0196254	1.88574	0.191	1.88574
K01C8.1.1	WBGene00010456	K01C8.1	2.79621e-25	4.96491e-22	7.362	0.708666	3.72405	16.2753	0.00533535	0.0155125	0.597314	0.597314
F56A6.5	WBGene00044427	F56A6.5	8.06893e-25	1.3225e-21	7.32627	0.71219	3.70261	16.1779	0.000802673	0.100069	0.607855	0.607855
T05A8.2.1	WBGene00020228	T05A8.2	1.16361e-23	1.3049e-20	7.26759	0.724825	3.6674	16.001	0.00491805	0.202584	0.625527	0.625527
ZC196.6a	WBGene00022550	droe-8	1.12582e-23	1.3049e-20	7.25997	0.723829	3.66283	15.8906	0.000862517	0.103686	0.627852	0.627852
B0284.4	WBGene00007134	pals-28	1.29258e-23	1.37705e-20	7.25609	0.724429	3.66051	15.918	0.000718772	0.162905	0.629038	0.629038
B0507.8	WBGene00015225	B0507.8	1.65392e-15	7.66087e-13	7.08281	0.889256	5.94808	15.7616	0.146905	0.802027	0.167609	0.802027
C53A5.11	WBGene00008269	C53A5.11	6.08567e-20	4.98721e-17	7.01575	0.767353	3.5163	14.9066	0.000963196	0.1862	0.705633	0.705633
R09D1.5	WBGene00011161	chil-18	1.04282e-23	1.3049e-20	6.91267	0.688684	4.02025	14.6752	0.0972995	0.355596	0.471844	0.471844
F11A5.3	WBGene00008671	F11A5.3	5.65261e-17	3.16948e-14	6.77784	0.809559	3.37355	13.8156	0.00123045	0.0439419	0.785233	0.785233
F14H8.6a	WBGene00000562	cng-1	1.39926e-16	7.64464e-14	6.74613	0.816248	3.35453	13.7609	0.00359111	0.1402	0.795923	0.795923
F25B3.5a.1	WBGene00009102	F25B3.5	6.65265e-20	5.24993e-17	6.74511	0.738529	3.70332	13.7307	0.0470041	0.0620542	0.607506	0.607506
K10H10.9	WBGene00010764	K10H10.9	1.70406e-16	9.07708e-14	6.7342	0.817133	3.34738	13.6586	0.00130619	0.0703695	0.799941	0.799941
C54D10.14a	WBGene00138721	pals-37	7.21438e-16	3.49356e-13	6.6887	0.82916	3.32007	13.47	0.00976487	0.0548024	0.815244	0.815244
ZK938.8	WBGene00044804	ZK938.8	1.33128e-11	3.26041e-09	6.62501	0.979277	4.40234	14.0303	0.0853785	1.0654	0.351603	1.0654
K08F9.3c	WBGene00010686	K08F9.3	3.49342e-15	1.58371e-12	6.60867	0.839529	3.27206	13.1627	0.00380254	0.0766173	0.841968	0.841968
Y119D3A.2	WBGene00022477	fbxa-28	2.08476e-22	2.11524e-19	6.60208	0.678001	4.09255	13.4568	0.104041	0.40342	0.447581	0.447581
R13H8.1e	WBGene00000912	daf-16	1.35942e-08	2.02553e-06	6.59476	1.16137	3.32993	13.1687	0.808815	-0.646872	0.809728	0.809728
W06H8.1c	WBGene00004373	rme-1	2.2787e-08	3.24642e-06	6.58529	1.17818	3.33496	13.5182	0.858814	-0.180977	0.806907	0.806907
Y113G7B.1b	WBGene00013754	fbxa-116	7.1734e-15	2.99694e-12	6.56676	0.843907	4.22621	13.5777	0.206039	0.648575	0.404871	0.648575
Y119D3A.4	WBGene00022479	fbxa-36	2.66198e-17	1.57552e-14	6.53757	0.772715	4.22345	13.3593	0.0648238	0.651682	0.40574	0.651682
F40H7.12	WBGene00044379	F40H7.12	8.50915e-55	1.81304e-50	6.53756	0.419342	6.48214	12.9802	0.0391882	0.171829	0.156379	0.171829
F56D3.1.1	WBGene00018969	F56D3.1	6.88226e-14	2.40394e-11	6.53514	0.872504	3.22794	12.8267	0.0473535	-0.0282825	0.866163	0.866163
Y58A7A.4	WBGene00021978	Y58A7A.4	1.29345e-17	8.10577e-15	6.52902	0.764139	6.58225	13.3139	0.137304	0.563387	0.155306	0.563387
C17H1.4a	WBGene00007657	pals-3	2.13724e-19	1.57028e-16	6.51259	0.72314	4.03885	13.1948	0.111529	0.515989	0.465354	0.515989
F48C1.11	WBGene00195179	F48C1.11	1.33567e-13	4.44674e-11	6.41816	0.867016	4.34302	13.0344	0.184288	0.717773	0.36898	0.717773
C17H1.5	WBGene00007658	pals-4	3.02763e-12	8.16579e-10	6.39389	0.916497	4.13724	13.0205	0.0783804	0.929581	0.433203	0.929581
Y17D7B.3	WBGene00012451	Y17D7B.3	8.32852e-19	5.72438e-16	6.37111	0.71945	4.31479	12.1894	0.243659	-0.22755	0.37747	0.37747
ZK938.5	WBGene00003863	old-2	4.73421e-09	7.70013e-07	6.35657	1.08543	3.96775	13.1821	0.108055	1.30574	0.491092	1.30574
Y32B12B.8	WBGene00202504	Y32B12B.8	1.10235e-19	8.38852e-17	6.33882	0.698235	4.29542	12.2249	0.201669	0.0258833	0.38337	0.38337
F42C5.3a	WBGene00018345	F42C5.3	4.42502e-09	7.36592e-07	6.33574	1.07981	4.54803	13.0919	0.270616	1.12857	0.312096	1.12857
F22B7.4	WBGene00017695	fip-1	9.55812e-13	2.78979e-10	6.31315	0.8846	3.09474	12.3974	0.00216811	0.585315	0.936853	0.936853
T05A8.1.2	WBGene00020227	T05A8.1	2.15673e-12	5.96798e-10	6.26592	0.892078	3.0664	11.837	0.00278976	0.075209	0.952174	0.952174
C35B1.2b	WBGene00016432	C35B1.2	2.09864e-08	3.02133e-06	6.17075	1.1012	3.0093	11.6328	0.471509	-0.192382	0.983658	0.983658
R09B5.2	WBGene00000555	cnc-1	2.60259e-06	0.000232997	6.15533	1.30966	3.00005	12.9101	0.00444795	2.05382	0.988837	2.05382
ZK1251.11b	WBGene00002091	ins-8	0.00018421	0.00990958	6.14478	1.6431	2.99372	13.7573	0.0256118	3.21414	0.992389	3.21414
T24A6.7	WBGene00020747	T24A6.7	9.31272e-14	3.14962e-11	6.10545	0.81949	3.5896	11.3833	0.139867	0.127243	0.666009	0.666009
D2030.2b.3	WBGene00008412	D2030.2	6.79962e-06	0.000550381	6.09217	1.35386	3.68088	11.4814	1.5808	-1.11802	0.618712	0.618712
ZC449.3b	WBGene00022613	sek-3	1.23114e-10	2.67672e-08	6.04037	0.93861	2.93107	10.9675	0.0291266	-0.00018554	1.02806	1.02806
F22D6.5b	WBGene00004186	prpf-4	4.72286e-06	0.000397747	6.03123	1.3178	2.93007	12.4258	1.05528	0.962135	1.02864	1.02864
F59E11.7a	WBGene00019113	F59E11.7	7.02465e-12	1.78184e-09	6.02967	0.879326	3.87438	11.603	0.240962	0.686894	0.528634	0.686894
C32B5.13	WBGene00016306	C32B5.13	4.46037e-10	9.13819e-08	5.99941	0.961905	2.9065	11.6306	0.0064363	1.10388	1.04229	1.10388
R11G11.3	WBGene00020013	R11G11.3	1.60767e-10	3.46005e-08	5.98312	0.935624	2.89673	10.7986	0.00248521	0.0765768	1.04799	1.04799
ZC47.12	WBGene00013843	fbxa-49	9.2687e-15	3.72619e-12	5.97278	0.770789	3.88458	11.2369	0.0612556	0.651684	0.524336	0.651684
ZK938.6	WBGene00014162	chil-9	3.3757e-11	7.65171e-09	5.96616	0.899985	3.88061	11.4075	0.0778347	0.894133	0.526005	0.894133
F15H10.6	WBGene00008873	F15H10.6	1.00963e-12	2.8683e-10	5.95926	0.835896	3.4482	11.0984	0.0951072	0.497598	0.743359	0.743359
ZK337.1c.1	WBGene00013969	tep-1	9.63321e-06	0.000754614	5.88645	1.3302	4.58354	11.9876	0.258727	1.86458	0.30324	1.86458
Y46E12A.1	WBGene00000560	cnc-6	1.33268e-08	2.01385e-06	5.87659	1.03428	5.56209	11.323	0.0956853	1.18799	0.183837	1.18799
W09G12.8	WBGene00021122	W09G12.8	5.86372e-12	1.50528e-09	5.8747	0.853519	3.39837	10.5679	0.102907	0.182797	0.771286	0.771286
W04G5.8	WBGene00012268	W04G5.8	3.71005e-24	4.94063e-21	5.87388	0.579337	4.71305	10.4069	0.128956	-0.0540315	0.273801	0.273801
T23F2.4	WBGene00020737	T23F2.4	2.81537e-09	4.83766e-07	5.87197	0.988211	2.83003	11.2229	0.00471409	1.16716	1.08737	1.16716
C18D11.6	WBGene00007682	C18D11.6	1.74903e-09	3.21263e-07	5.81562	0.966123	4.6544	10.9865	0.15108	0.968992	0.286564	0.968992
F11A5.13	WBGene00008679	F11A5.13	1.92561e-09	3.47703e-07	5.79505	0.965205	2.78388	10.1772	0.0028422	0.133749	1.1151	1.1151
F26D11.13	WBGene00045393	F26D11.13	5.80853e-12	1.50528e-09	5.78336	0.840084	3.77093	10.6694	0.075112	0.771777	0.574882	0.771777
B0507.10	WBGene00015227	ddn-1	8.4289e-32	2.56564e-28	5.71225	0.486769	6.6071	10.0022	0.0220396	0.262293	0.155036	0.262293
B0495.10a.2	WBGene00007044	cpna-5	7.58278e-05	0.00468108	5.69695	1.43963	2.72502	10.1251	1.33606	-0.81805	1.15099	1.15099
F26F12.3b.2	WBGene00017834	F26F12.3	0.000956494	0.0394192	5.69041	1.72279	5.00234	12.3854	0.506516	3.05509	0.225506	3.05509
C17H1.10.1	WBGene00044237	pals-9	0.000148789	0.00827803	5.689	1.49983	2.72025	9.77862	1.54548	-1.45319	1.15392	1.15392
Y38E10A.15	WBGene00012593	nspe-7	1.44586e-08	2.12461e-06	5.68456	1.00294	3.60541	10.5996	0.0883583	1.11872	0.65764	1.11872
C38D9.2.1	WBGene00008010	C38D9.2	6.79922e-05	0.00428612	5.66588	1.42244	2.70638	11.4517	0.654793	1.77322	1.16247	1.77322
K09C8.3b	WBGene00003529	nas-10	2.61801e-10	5.52296e-08	5.66145	0.895818	3.26952	9.90123	0.119618	0.261225	0.843371	0.843371
H23L24.5	WBGene00004052	parg-2	1.41206e-24	2.14905e-21	5.63225	0.550405	5.24319	9.78931	0.0913775	0.272157	0.202082	0.272157
T19A5.2c	WBGene00001526	gck-1	1.27925e-07	1.54869e-05	5.62471	1.06492	2.79824	9.70607	0.254438	0.0320548	1.10644	1.10644
C18C4.10c.2	WBGene00002215	klc-2	6.05158e-06	0.000495927	5.60745	1.23933	2.67132	9.62308	0.658961	-0.405591	1.18417	1.18417
F14F9.4	WBGene00017467	F14F9.4	2.49662e-08	3.47682e-06	5.58329	1.00176	6.88752	10.2551	0.0214878	1.18273	0.151943	1.18273
C06B3.7	WBGene00007366	C06B3.7	9.07291e-47	9.66583e-43	5.58166	0.388664	6.35345	9.38737	0.023357	0.031165	0.157915	0.157915
R06B9.1	WBGene00011052	arrd-11	3.25592e-12	8.67174e-10	5.58154	0.80123	3.84216	9.40481	0.227829	-0.149498	0.542534	0.542534
C27A7.1a	WBGene00007753	C27A7.1	3.53185e-06	0.000302221	5.53539	1.1937	2.62809	9.52506	0.498757	-0.0548812	1.21113	1.21113
T16A1.7	WBGene00004149	trpl-5	4.04212e-08	5.3494e-06	5.53217	1.00787	2.62616	9.55212	0.00660974	0.487568	1.21234	1.21234
F42E11.1a	WBGene00003998	pgp-4	1.09585e-07	1.34192e-05	5.52571	1.04061	2.62228	9.25689	0.0846761	0.0444452	1.21477	1.21477
F22G12.1	WBGene00009061	pals-14	1.58686e-09	2.9989e-07	5.5164	0.914026	3.18249	9.40591	0.111973	0.256963	0.890559	0.890559
Y97E10AR.1.1	WBGene00022396	Y97E10AR.1	0.00227132	0.0793362	5.51214	1.80593	2.78622	9.53114	2.79996	-2.24527	1.11369	1.11369
C54D10.12	WBGene00044787	pals-36	6.84727e-08	8.73622e-06	5.48058	1.01584	2.5952	9.08199	0.00654519	0.0880626	1.23177	1.23177
K03D3.10	WBGene00004287	rac-2	3.15389e-09	5.37599e-07	5.46468	0.922561	3.15146	9.17993	0.114514	0.180303	0.906828	0.906828
Y58A7A.5	WBGene00021979	Y58A7A.5	1.29291e-45	9.18264e-42	5.45073	0.384509	6.62476	9.01363	0.0225762	0.111394	0.15484	0.15484
F32F2.1c	WBGene00009337	uig-1	2.26989e-07	2.60024e-05	5.43112	1.04934	2.56552	8.90405	0.0708655	0.00239096	1.25047	1.25047
Y105C5A.1270	WBGene00194646	Y105C5A.1270	1.22818e-07	1.49536e-05	5.42051	1.02482	2.55916	9.24267	0.00581444	0.564973	1.25448	1.25448
Y6E2A.4	WBGene00012398	Y6E2A.4	2.62811e-07	2.97858e-05	5.41887	1.05255	2.55818	9.80632	0.00832933	1.3211	1.2551	1.3211
W04G5.7	WBGene00012267	W04G5.7	1.44411e-07	1.71897e-05	5.40286	1.02725	2.54857	8.84994	0.00511551	0.118426	1.26117	1.26117
D1046.1e.6	WBGene00008362	cfim-2	0.000159799	0.00882083	5.38521	1.42642	2.53798	9.24978	1.17374	-0.440887	1.26787	1.26787
T21E8.1a	WBGene00004000	pgp-6	2.35105e-05	0.00170387	5.37426	1.27092	2.53141	8.68762	0.66625	-0.63582	1.27203	1.27203
T20H9.2	WBGene00020638	fbxa-43	5.3432e-12	1.40553e-09	5.37298	0.779128	3.98425	8.84087	0.243553	-0.00328604	0.484895	0.484895
ZC47.13a	WBGene00013844	fbxa-50	2.67489e-09	4.63365e-07	5.35971	0.900732	3.42618	9.06977	0.217902	0.384514	0.75568	0.75568
Y58A7A.3.1	WBGene00021977	Y58A7A.3	0.00186302	0.0673278	5.32796	1.71249	7.26254	11.1555	0.00382648	3.5153	0.151183	3.5153
F59B10.4a	WBGene00010320	F59B10.4	2.91878e-06	0.000255927	5.28257	1.12961	3.93233	9.49333	1.02638	0.469181	0.504846	0.504846
T26F2.3.2	WBGene00045401	eol-1	1.37891e-20	1.27741e-17	5.28022	0.567647	4.88644	8.39702	0.144805	-0.101085	0.241863	0.241863
E02C12.10	WBGene00017095	E02C12.10	1.50494e-06	0.000144441	5.27981	1.09754	2.47474	9.44706	0.00817262	1.43734	1.30796	1.43734
Y50D4B.5	WBGene00021744	clec-203	4.56149e-07	4.93359e-05	5.27837	1.04649	2.47388	8.88677	0.00565119	0.698897	1.30851	1.30851
F11E6.11a.1	WBGene00023501	F11E6.11	5.45464e-05	0.00355419	5.27671	1.30766	2.47288	9.89207	0.14552	1.90644	1.30914	1.90644
Y113G7B.1a	WBGene00013754	fbxa-116	1.57453e-06	0.000149104	5.26544	1.09662	2.56242	8.35863	0.190652	-0.13576	1.25243	1.25243
C17H1.6	WBGene00007659	pals-5	5.46366e-07	5.70171e-05	5.2592	1.04989	2.46238	8.36818	0.00691966	0.0869609	1.31581	1.31581
Y71H2AM.25	WBGene00044760	Y71H2AM.25	1.98323e-20	1.7607e-17	5.23835	0.565499	4.83317	8.44097	0.133013	0.145477	0.250734	0.250734
B0507.6	WBGene00015223	B0507.6	3.59531e-10	7.43741e-08	5.23383	0.834655	4.65787	8.84489	0.147583	0.688396	0.285782	0.688396
F57H12.3	WBGene00003879	ora-1	2.38656e-27	6.32165e-24	5.23245	0.482985	6.59784	8.42352	0.0144317	0.265498	0.155137	0.265498
F25B3.5b.1	WBGene00009102	F25B3.5	5.75578e-07	5.95332e-05	5.20171	1.0405	2.60521	8.35538	0.0736922	0.243716	1.22548	1.22548
T17A3.10	WBGene00020546	zig-13	1.38605e-13	4.54346e-11	5.19577	0.702353	4.26509	8.47148	0.199243	0.297664	0.392716	0.392716
R09B5.3a.1	WBGene00000556	cnc-2	0.00012133	0.00685721	5.18346	1.34866	2.41693	8.31406	0.837985	-0.499889	1.34467	1.34467
K08F9.3d	WBGene00010686	K08F9.3	1.72242e-06	0.000161726	5.18009	1.0829	2.41491	8.09147	0.0612577	-0.00596788	1.34595	1.34595
T05F1.9	WBGene00011494	T05F1.9	5.49568e-14	1.95161e-11	5.17888	0.68872	4.985	8.47314	0.115761	0.453442	0.227696	0.453442
K08F9.3b	WBGene00010686	K08F9.3	1.27916e-06	0.000126181	5.17801	1.06918	2.41366	8.1333	0.0250405	0.0946228	1.34674	1.34674
B0507.17	WBGene00235307	B0507.17	1.21738e-06	0.000120645	5.16394	1.06412	2.40522	8.08503	0.00671979	0.106792	1.3521	1.3521
R09D1.4	WBGene00011160	R09D1.4	2.96344e-13	9.11703e-11	5.16258	0.707586	4.14436	8.4367	0.169896	0.418127	0.430918	0.430918
C32F10.1b.1	WBGene00016331	obr-4	0.000404347	0.0192308	5.15619	1.45769	2.40057	9.39393	1.19478	0.695946	1.35505	1.35505
F30H5.2	WBGene00003770	nlp-32	7.35729e-06	0.00058933	5.15078	1.14894	2.39732	9.14721	0.00893869	1.57513	1.35711	1.57513
ZK809.4c	WBGene00001320	ent-1	0.000166414	0.00911514	5.1409	1.36537	2.39139	8.13629	0.876217	-0.599358	1.36087	1.36087
F36H5.2a.4	WBGene00018101	math-27	1.09635e-05	0.00085255	5.12727	1.16602	2.38321	8.17155	0.265467	0.114386	1.36605	1.36605
C45B2.8	WBGene00016662	C45B2.8	2.70262e-06	0.000238941	5.11445	1.08999	5.7952	8.91654	0.0330133	1.39267	0.174072	1.39267
F53B6.8	WBGene00009963	fipr-26	0.000114731	0.00655383	5.0965	1.32132	2.98423	9.36361	0.140925	1.95415	0.997733	1.95415
F18A1.3g	WBGene00003044	lir-1	0.00151256	0.0574935	5.08435	1.60275	2.56195	8.50556	1.82985	-0.829351	1.25272	1.25272
C37H5.9c.2	WBGene00003528	nas-9	8.13772e-05	0.0049399	5.07704	1.28849	2.35307	9.1397	0.607112	1.26864	1.38513	1.38513
Y49C4A.8b	WBGene00021709	ugt-29	3.86191e-07	4.28571e-05	5.04986	0.99492	3.62332	8.5412	0.428382	0.759458	0.648237	0.759458
C17C3.4	WBGene00002094	ins-11	4.00525e-07	4.3764e-05	5.03937	0.994212	2.94995	8.50818	0.140344	1.0458	1.01722	1.0458
B0303.11a.2	WBGene00015131	B0303.11	9.61921e-05	0.00564619	5.03321	1.29057	2.32775	7.62483	0.597565	-0.564426	1.40111	1.40111
Y105E8B.1l	WBGene00002978	lev-11	0.00155875	0.0586788	5.0309	1.59029	3.23523	8.41049	2.17262	-1.08261	0.862193	0.862193
T10C6.15a	WBGene00050899	T10C6.15	3.94685e-07	4.34998e-05	4.95893	0.977804	3.37673	8.2378	0.284052	0.863268	0.783446	0.863268
F19B10.13	WBGene00194713	F19B10.13	9.58191e-08	1.19393e-05	4.95391	0.928659	4.01916	8.13855	0.201119	0.833771	0.47223	0.833771
R05G6.10b	WBGene00019902	R05G6.10	0.000506465	0.0234083	4.94641	1.42248	2.60161	7.77059	1.2004	-0.626406	1.22774	1.22774
Y54G2A.36.3	WBGene00021898	Y54G2A.36	0.0007594	0.0325564	4.94505	1.4686	2.27388	7.79167	1.15318	-0.545679	1.43496	1.43496
ZC443.5	WBGene00013900	ugt-18	4.70758e-08	6.15365e-06	4.9404	0.904502	4.11188	8.05859	0.164248	0.8175	0.441359	0.8175
F56D2.5	WBGene00018966	F56D2.5	3.27613e-26	6.98044e-23	4.92401	0.464918	6.84178	7.46829	0.0137226	0.245656	0.152313	0.245656
F31D5.2.1	WBGene00017945	F31D5.2	0.000797819	0.0341348	4.92155	1.46757	2.26222	7.29355	1.14223	-1.10618	1.44226	1.44226
B0284.2	WBGene00007132	pals-27	2.24209e-16	1.16518e-13	4.91683	0.599001	4.43892	7.42678	0.0893296	0.142975	0.341234	0.341234
C25F9.16	WBGene00194803	C25F9.16	8.25637e-06	0.000656412	4.91459	1.10231	2.2556	8.26241	0.0117029	1.34357	1.44641	1.44641
C05E4.9a.2	WBGene00001564	icl-1	0.000655366	0.0292975	4.90794	1.44029	2.25162	7.66678	1.04042	-0.453195	1.44891	1.44891
C45G7.3	WBGene00016670	ilys-3	0.000241382	0.0124531	4.89854	1.3343	3.43125	8.80105	0.234544	1.9019	0.752837	1.9019
F14H8.6b	WBGene00000562	cng-1	6.23678e-06	0.000507203	4.89821	1.08411	3.58699	8.25551	0.447004	0.963342	0.667397	0.963342
ZC47.13b	WBGene00013844	fbxa-50	2.82443e-10	5.90001e-08	4.88374	0.774199	4.05391	7.22646	0.259032	-0.164129	0.460229	0.460229
ZK970.6	WBGene00001532	gcy-5	2.37836e-07	2.70994e-05	4.87209	0.942919	3.05455	7.92137	0.0974992	0.969415	0.958641	0.969415
Y54F10AM.2d	WBGene00001410	feh-1	0.0029669	0.0978573	4.85212	1.63308	2.21831	7.57483	1.73057	-1.048	1.46976	1.46976
F25E2.5f	WBGene00000899	daf-3	0.001095	0.044021	4.84906	1.48521	2.51738	7.23051	1.3661	-1.13079	1.28091	1.28091
Y17D7B.2	WBGene00012450	Y17D7B.2	6.47841e-11	1.42305e-08	4.83378	0.739986	3.94708	7.14303	0.158052	0.0198013	0.499044	0.499044
F55A4.8b	WBGene00018860	vpat-1	0.000872251	0.0365847	4.83325	1.45196	2.2068	7.63483	1.05285	-0.217216	1.47696	1.47696
ZK970.7	WBGene00014173	ZK970.7	9.56632e-34	4.07659e-30	4.80674	0.396985	7.76594	7.07327	0.00359148	0.185525	0.153417	0.185525
W04G5.16	WBGene00206393	W04G5.16	4.80413e-07	5.1438e-05	4.80256	0.95403	3.01283	7.68569	0.110519	0.911226	0.981689	0.981689
B0496.3f	WBGene00006814	unc-82	0.00265639	0.0896986	4.76309	1.58509	2.16471	6.8129	1.51178	-1.50273	1.50324	1.50324
T09F5.20b	WBGene00202514	T09F5.20	3.26088e-06	0.000282437	4.74429	1.01947	2.71922	7.07686	0.0926337	0.339873	1.15456	1.15456
C48A7.2a.2	WBGene00016739	pitr-1	0.000222367	0.0116127	4.7123	1.2763	2.13423	6.9803	0.432508	-0.007757	1.52223	1.52223
C45B2.3	WBGene00016660	C45B2.3	1.31969e-06	0.000129579	4.70106	0.971944	4.57127	7.48021	0.0675784	1.06603	0.306263	1.06603
M142.2.1	WBGene00000853	cut-6	0.000346429	0.0170078	4.69568	1.31243	2.12431	7.88294	0.538558	1.15226	1.52841	1.52841
C05E4.14c	WBGene00005228	srh-2	4.69154e-05	0.0031534	4.67306	1.14804	2.11069	6.59636	0.0447023	0.0154521	1.53688	1.53688
Y116A8C.16d	WBGene00004403	rom-4	0.000151126	0.00838553	4.66951	1.23232	2.10856	6.57421	0.284119	-0.240222	1.5382	1.5382
F01F1.1a	WBGene00017158	hpo-10	0.00234208	0.0814075	4.66214	1.53207	2.10413	7.01878	1.27573	-0.611563	1.54095	1.54095
C54D10.7	WBGene00008301	pals-39	1.84371e-12	5.16894e-10	4.64831	0.659726	4.27781	6.52104	0.133504	-0.0814892	0.388782	0.388782
C04G6.2	WBGene00015453	C04G6.2	4.59059e-05	0.00309531	4.64775	1.1404	2.0955	6.86948	0.0142918	0.504393	1.54632	1.54632
F13H6.1b.1	WBGene00017430	bcl-11	2.28546e-08	3.24642e-06	4.64183	0.830549	4.44729	6.46734	0.488873	-0.484407	0.338901	0.338901
C39F7.2a	WBGene00016539	madd-2	0.000827503	0.0351928	4.63176	1.38533	2.08591	7.20634	0.750706	0.27647	1.55227	1.55227
F38H12.3b	WBGene00018189	nhr-181	0.000100713	0.00587913	4.62457	1.18918	2.08159	6.42702	0.142033	-0.127324	1.55495	1.55495
F09A5.4e.1	WBGene00008601	mob-2	0.000672362	0.0298459	4.62376	1.35969	2.08111	6.72845	0.663246	-0.24364	1.55525	1.55525
C34D4.15a	WBGene00000687	col-113	0.000107333	0.00621453	4.58783	1.18445	2.05955	7.22176	0.114895	1.09484	1.56861	1.56861
B0213.17	WBGene00015046	nlp-34	5.48576e-07	5.70171e-05	4.58105	0.914656	7.0726	7.04874	0.00721669	0.996697	0.151141	0.996697
Y119D3A.3	WBGene00022478	fbxa-35	1.44758e-11	3.50496e-09	4.57465	0.677419	4.32581	6.51848	0.176534	0.143807	0.374141	0.374141
F13B12.3a	WBGene00008731	F13B12.3	9.93299e-05	0.00581435	4.56272	1.17227	2.04449	6.27506	0.0711179	-0.0317491	1.57793	1.57793
C26D10.7	WBGene00023420	C26D10.7	2.04311e-05	0.00151154	4.54816	1.06761	3.34092	7.23155	0.0384079	1.32935	0.803567	1.32935
B0213.5	WBGene00003768	nlp-30	6.37179e-07	6.52711e-05	4.53158	0.910029	5.61874	6.90589	0.0379453	0.955839	0.181364	0.955839
T07A5.7	WBGene00045475	T07A5.7	9.82807e-13	2.82982e-10	4.52723	0.634698	4.95409	6.51131	0.0624287	0.420981	0.231821	0.420981
T27E7.6	WBGene00012091	pals-29	9.06551e-05	0.00541061	4.52301	1.1555	2.02066	6.22451	0.00955292	0.106759	1.59266	1.59266
C08H9.4b.2	WBGene00007465	chil-1	0.000276015	0.0140025	4.51519	1.24152	2.01596	6.28211	0.254081	-0.0326911	1.59556	1.59556
ZC196.1	WBGene00022545	ZC196.1	5.2806e-07	5.5977e-05	4.51463	0.900077	3.46924	6.32171	0.240532	0.0356721	0.731633	0.731633
T20D4.7	WBGene00020613	T20D4.7	9.76917e-33	3.4692e-29	4.51268	0.378708	6.3625	6.20054	0.0143087	0.107365	0.157795	0.157795
W01A11.7.2	WBGene00020912	W01A11.7	0.000184639	0.00990958	4.51239	1.20679	2.01429	6.17659	0.151027	-0.0602313	1.59659	1.59659
Y75B8A.39	WBGene00023483	Y75B8A.39	2.89027e-17	1.6644e-14	4.50467	0.533039	4.76383	6.12438	0.077418	-0.0283978	0.263539	0.263539
K02E7.10	WBGene00019314	K02E7.10	1.96504e-24	2.79127e-21	4.49435	0.440585	5.24533	6.17606	0.0310172	0.124049	0.201921	0.201921
W01C9.3b	WBGene00004155	pqn-73	0.000817773	0.0349184	4.4659	1.33441	1.98639	7.09583	0.52301	0.960397	1.61379	1.61379
F43C1.7	WBGene00023423	F43C1.7	3.357e-13	1.00743e-10	4.46047	0.612766	4.48436	6.06265	0.121819	0.00338975	0.32876	0.32876
C49G7.5	WBGene00016783	irg-2	5.78927e-34	3.0838e-30	4.4466	0.365998	6.76656	5.99369	0.00764663	0.0750515	0.153098	0.153098
F07G11.9	WBGene00017233	lmd-4	3.78905e-07	4.22687e-05	4.43982	0.874108	4.57789	6.60127	0.0985701	0.818308	0.304627	0.818308
T19A5.2h	WBGene00001526	gck-1	0.00165022	0.0617948	4.41668	1.40351	3.74932	7.62496	1.36279	1.00101	0.585116	1.00101
Y61A9LA.1a	WBGene00022014	Y61A9LA.1	0.000409929	0.019439	4.40815	1.24749	3.54461	7.23013	0.309915	1.55757	0.690187	1.55757
F19C7.8e	WBGene00017597	F19C7.8	0.000213877	0.0112243	4.4021	1.1891	1.94811	6.00726	0.059446	0.198845	1.63731	1.63731
T16G1.4	WBGene00011798	T16G1.4	0.00111214	0.0446238	4.38097	1.34365	3.56845	7.38273	0.0239139	2.14256	0.677312	2.14256
T28A11.4	WBGene00020871	T28A11.4	0.000196489	0.0104665	4.37952	1.17619	1.93457	6.07047	0.0144843	0.40739	1.64562	1.64562
K01A6.7	WBGene00045096	K01A6.7	0.000245216	0.0126203	4.34008	1.18349	1.9109	6.34014	0.0206667	0.898329	1.6601	1.6601
B0284.1	WBGene00007131	pals-26	1.22018e-25	2.36348e-22	4.31432	0.41217	5.68702	5.71044	0.0253518	0.14322	0.178509	0.178509
F15H10.12	WBGene00195181	F15H10.12	0.000294069	0.0147777	4.30558	1.18923	1.8902	5.95515	0.0243837	0.500621	1.67274	1.67274
R09B5.9	WBGene00000558	cnc-4	1.6287e-09	3.01763e-07	4.29965	0.712915	6.63437	6.00351	0.00858561	0.601312	0.154732	0.601312
Y39A3B.7	WBGene00206512	Y39A3B.7	7.9906e-05	0.00487533	4.29881	1.08977	2.50562	5.90951	0.13676	0.350674	1.28837	1.28837
C25F9.1c	WBGene00005832	srw-85	0.00115025	0.0456396	4.292	1.32024	1.88205	6.35564	0.413916	0.691761	1.67771	1.67771
Y53F4B.27a	WBGene00013173	Y53F4B.27	0.00183064	0.0669687	4.28866	1.37615	1.88005	6.69673	0.593618	0.978324	1.67893	1.67893
T21E8.2	WBGene00004001	pgp-7	0.00036203	0.0175712	4.28617	1.20185	1.87855	6.16873	0.0534767	0.823016	1.67984	1.67984
F14F8.8	WBGene00008816	F14F8.8	0.000327922	0.0162112	4.27857	1.19108	1.87399	6.05424	0.0197784	0.730096	1.68262	1.68262
F25H2.12b	WBGene00009123	F25H2.12	0.00183036	0.0669687	4.25356	1.36487	1.85899	5.98259	0.543691	0.195981	1.69175	1.69175
Y2H9A.4e	WBGene00012381	Y2H9A.4	0.000852818	0.0360535	4.23038	1.26846	1.84636	5.47928	0.23136	-0.084116	1.69943	1.69943
T19H5.3	WBGene00011848	chil-27	0.00294626	0.0976318	4.22736	1.42178	3.14843	7.18048	0.0509229	2.37482	0.908406	2.37482
K11D12.10a	WBGene00003374	mlk-1	0.000948541	0.0392438	4.22452	1.27808	3.53167	6.82413	0.906561	1.05363	0.697227	1.05363
W08A12.4	WBGene00021081	pals-33	1.72412e-05	0.00128898	4.22021	0.98192	2.83304	5.85492	0.0714284	0.611058	1.08557	1.08557
R53.3c	WBGene00001207	egl-43	0.000501107	0.0232111	4.21232	1.21038	1.83424	5.35075	0.0512406	-0.0143513	1.70678	1.70678
ZK1010.7.1	WBGene00000672	col-97	0.00242727	0.0836122	4.20608	1.38711	1.8305	6.96956	0.599845	1.61644	1.70905	1.70905
C17H1.14	WBGene00044709	pals-12	0.00114718	0.0456026	4.20044	1.29177	1.82712	5.50342	0.291307	-0.0109112	1.7111	1.7111
C06C6.5a.2	WBGene00003640	nhr-50	3.13695e-05	0.00219144	4.17949	1.00389	2.9377	5.95294	0.185113	0.764878	1.02424	1.02424
T23E7.6	WBGene00044772	T23E7.6	8.00838e-05	0.00487533	4.17164	1.05768	4.38066	6.2276	0.145048	1.19737	0.357877	1.19737
ZK822.3a	WBGene00003736	nhx-9	0.0010526	0.0427194	4.15993	1.26979	1.80281	5.22676	0.209032	-0.162026	1.72581	1.72581
Y2H9A.6b	WBGene00086568	Y2H9A.6	9.45546e-05	0.0055654	4.1237	1.05623	3.15905	6.10554	0.0862182	1.25254	0.90287	1.25254
C37A5.3	WBGene00014698	C37A5.3	0.0012866	0.0503926	4.11526	1.27845	2.89649	6.5516	0.0533979	1.90792	1.04812	1.90792
F21H7.2.1	WBGene00009028	F21H7.2	0.00116366	0.0460858	4.10101	1.26277	1.76746	5.09203	0.166369	-0.104314	1.74713	1.74713
F33H12.2	WBGene00005551	sri-39	0.0003791	0.0181925	4.09629	1.15251	2.38411	6.22934	0.148855	1.44509	1.36549	1.44509
Y80D3A.7a	WBGene00004236	ptr-22	1.35611e-07	1.63247e-05	4.07057	0.772244	4.31923	5.09046	0.339506	-0.180049	0.376127	0.376127
C13D9.1	WBGene00005657	srr-6	6.05324e-08	7.81676e-06	4.05901	0.749279	4.30164	5.44795	0.120965	0.552738	0.381469	0.552738
T16G1.7	WBGene00011801	T16G1.7	4.23159e-15	1.84005e-12	4.05742	0.517009	4.73668	5.04832	0.0518232	0.0942134	0.268934	0.268934
ZK757.4b	WBGene00014075	dhhc-4	0.00108844	0.0438402	4.05723	1.24203	1.74119	4.94811	0.0882635	-0.0752455	1.76291	1.76291
ZK938.10	WBGene00202513	ZK938.10	0.000944942	0.039171	4.04307	1.22279	1.7327	5.07767	0.0262549	0.2054	1.76801	1.76801
C37A5.2	WBGene00007989	fipr-22	8.54503e-07	8.58816e-05	4.0108	0.814791	3.838	4.89253	0.252298	-0.163525	0.544364	0.544364
F32E10.3b	WBGene00017991	clec-180	0.00203518	0.0725143	4.00094	1.29688	1.70742	5.05878	0.235143	0.106881	1.78313	1.78313
C38D9.2.2	WBGene00008010	C38D9.2	4.52542e-09	7.47465e-07	3.98836	0.680172	4.06652	4.84661	0.0991381	0.000203621	0.456023	0.456023
C05E4.12	WBGene00015491	C05E4.12	0.000104876	0.00610545	3.97538	1.02484	2.68614	5.42108	0.0853787	0.82127	1.17498	1.17498
Y9C9A.3	WBGene00006208	str-163	0.000497365	0.0230879	3.96743	1.13936	2.30679	4.92322	0.143456	0.124621	1.4143	1.4143
F52E10.4a	WBGene00009935	F52E10.4	0.00195663	0.0703034	3.96717	1.28108	1.68715	5.20244	0.174172	0.467053	1.79523	1.79523
C17H1.13b	WBGene00044708	pals-11	0.00155594	0.0586788	3.96636	1.25357	1.68667	4.85193	0.0902188	0.0862254	1.79552	1.79552
C54C8.6	WBGene00003098	lys-9	0.00130889	0.0511531	3.96179	1.23266	1.68393	4.7105	0.0261897	-0.0238494	1.79715	1.79715
R13D11.10	WBGene00020063	R13D11.10	0.00132992	0.051709	3.95553	1.23247	1.68017	5.55719	0.0233823	1.12771	1.79938	1.79938
C31B8.4	WBGene00016281	pals-32	3.58884e-06	0.000305869	3.95474	0.853442	3.52048	4.93064	0.170693	0.147493	0.703344	0.703344
R09D1.12	WBGene00011168	R09D1.12	6.12599e-06	0.000500101	3.93992	0.871279	3.41076	4.83934	0.146627	0.0966384	0.764326	0.764326
W09G12.7	WBGene00021121	W09G12.7	2.67024e-27	6.32165e-24	3.9372	0.363771	6.76923	4.69721	0.00572848	0.0566068	0.153067	0.153067
ZK84.7	WBGene00002103	ins-20	0.00148573	0.0567321	3.93691	1.23901	1.669	5.57512	0.0361565	1.19762	1.80603	1.80603
K02H11.6	WBGene00019349	trx-5	7.38247e-05	0.00459936	3.93444	0.99264	3.11144	4.99616	0.254475	0.215146	0.927926	0.927926
B0507.7	WBGene00015224	B0507.7	2.32628e-06	0.000211821	3.919	0.829805	3.5829	4.88056	0.156713	0.207285	0.66958	0.66958
T20G5.12	WBGene00011873	T20G5.12	0.000308278	0.0153829	3.91608	1.08531	2.48094	5.04414	0.109462	0.481794	1.30403	1.30403
K03D3.13	WBGene00044670	rac-3	0.000735925	0.0317416	3.91504	1.15973	2.22167	4.90716	0.146299	0.265568	1.46766	1.46766
C06B3.6.1	WBGene00007365	C06B3.6	1.61693e-05	0.0012217	3.90398	0.905349	5.17484	5.31	0.130352	0.853235	0.207586	0.853235
T11B7.2a	WBGene00011707	T11B7.2	3.99826e-08	5.32443e-06	3.88805	0.708086	5.35714	4.98632	0.305578	0.296085	0.194404	0.296085
F28D1.3	WBGene00009213	thn-1	1.34197e-14	5.22347e-12	3.86189	0.501429	4.81595	4.54949	0.047933	0.0523904	0.253784	0.253784
C43D7.4	WBGene00008067	C43D7.4	0.00200548	0.0717273	3.85652	1.2483	1.62077	4.82436	0.0352895	0.448074	1.83462	1.83462
ZK899.8j	WBGene00001516	gap-2	0.000699523	0.0307949	3.83751	1.13209	3.04026	5.53285	0.571456	0.915085	0.96649	0.96649
F28H7.6	WBGene00009239	irld-6	4.66426e-09	7.64473e-07	3.83439	0.654475	4.21463	4.53304	0.105483	0.0575536	0.408522	0.408522
F57H12.6.2	WBGene00019021	F57H12.6	3.71943e-16	1.84302e-13	3.82671	0.469687	5.33432	4.59167	0.0223814	0.242346	0.195812	0.242346
C17H1.8a	WBGene00007661	pals-7	0.00246182	0.0844671	3.79852	1.25447	1.58597	4.35507	0.0333064	0.00194188	1.85512	1.85512
C02E7.10	WBGene00015342	C02E7.10	0.00242906	0.0836122	3.79642	1.2521	1.58471	4.46687	0.0254461	0.165253	1.85586	1.85586
K08E7.7a	WBGene00000841	cul-6	1.21645e-06	0.000120645	3.78925	0.780815	5.60612	4.75978	0.549701	0.0533163	0.181905	0.181905
Y2H9A.6a	WBGene00086568	Y2H9A.6	0.000374351	0.0180526	3.77038	1.05983	2.63045	5.00249	0.138232	0.845449	1.20965	1.20965
C54F6.5	WBGene00016923	C54F6.5	2.16254e-05	0.00158341	3.76854	0.887257	4.43483	4.96908	0.0877839	0.856885	0.342378	0.856885
F48C1.9	WBGene00018601	F48C1.9	1.71436e-05	0.00128619	3.7552	0.87347	5.27306	4.91711	0.0404852	0.875054	0.199903	0.875054
F52E1.8	WBGene00018696	pho-6	1.31928e-18	8.51817e-16	3.74196	0.425026	5.3613	4.32934	0.0226229	0.148928	0.194153	0.194153
T07H8.5	WBGene00005188	srg-31	2.39501e-05	0.001724	3.73162	0.883335	3.43176	4.24457	0.183784	-0.0943702	0.752553	0.752553
Y54F10BM.3	WBGene00021858	Y54F10BM.3	5.47217e-05	0.00355474	3.71832	0.921633	4.53322	4.91223	0.0628994	0.956389	0.315883	0.956389
F13A7.11	WBGene00008726	F13A7.11	2.44759e-16	1.24168e-13	3.71738	0.453458	6.04514	4.33073	0.0117597	0.23499	0.164242	0.23499
F34H10.9	WBGene00219417	F34H10.9	0.0015851	0.0595656	3.71288	1.17547	2.15406	4.69452	0.148191	0.596978	1.50988	1.50988
Y6E2A.5	WBGene00012399	Y6E2A.5	0.000568989	0.0259611	3.71199	1.07719	2.5281	4.64957	0.118289	0.569596	1.27412	1.27412
F46C3.6	WBGene00045253	F46C3.6	2.13538e-05	0.00156891	3.70238	0.871099	5.26063	4.79522	0.0282156	0.882361	0.200794	0.882361
F45D3.4a.1	WBGene00009724	F45D3.4	4.34435e-05	0.00295838	3.66755	0.897071	6.95749	4.75953	0.792397	0.173286	0.151518	0.173286
F32G8.3	WBGene00009339	F32G8.3	0.000303073	0.0151587	3.66195	1.01364	2.69417	4.87988	0.0629605	1.07959	1.17001	1.17001
C04A11.5	WBGene00007288	C04A11.5	5.0121e-05	0.00332688	3.65978	0.902522	3.3846	4.12889	0.19843	-0.0508531	0.779025	0.779025
K08F9.3a	WBGene00010686	K08F9.3	2.22146e-06	0.00020402	3.648	0.770895	3.90851	4.30136	0.198702	0.213295	0.514433	0.514433
Y39G8B.5	WBGene00012726	Y39G8B.5	9.18374e-06	0.000724733	3.64343	0.821416	3.60788	4.45781	0.153334	0.480583	0.656334	0.656334
C17H1.7	WBGene00007660	pals-6	4.92197e-05	0.00327726	3.60176	0.887285	3.39255	4.20708	0.170173	0.250211	0.774556	0.774556
K01A6.8	WBGene00194869	K01A6.8	0.000958329	0.0394192	3.59955	1.08995	2.65186	3.94985	0.229319	-0.14557	1.19628	1.19628
B0281.8	WBGene00015114	B0281.8	0.00113454	0.045354	3.5938	1.10414	2.35095	4.40712	0.0764823	0.63351	1.38647	1.38647
EGAP1.1	WBGene00017146	EGAP1.1	0.000882452	0.0368675	3.59134	1.07992	2.45571	4.58231	0.0794377	0.871225	1.32004	1.32004
ZK666.6	WBGene00014046	clec-60	0.0021999	0.0777333	3.58824	1.17193	2.97283	5.09872	0.0322773	1.61582	1.00418	1.61582
Y40B10A.6	WBGene00021491	comt-4	2.38899e-05	0.001724	3.57821	0.846906	4.45047	4.4866	0.0550513	0.805648	0.338018	0.805648
F57G8.7	WBGene00010216	F57G8.7	2.52372e-06	0.000226889	3.56802	0.758152	3.75829	3.86042	0.108909	-0.0539859	0.580844	0.580844
Y94H6A.2	WBGene00022375	Y94H6A.2	0.000655883	0.0292975	3.56791	1.04711	2.89152	4.27778	0.264701	0.347018	1.05103	1.05103
T28A11.13	WBGene00020875	T28A11.13	0.00169239	0.062822	3.56318	1.13495	2.33258	4.72223	0.147673	1.07014	1.39807	1.39807
T27F6.8.2	WBGene00012107	T27F6.8	1.95165e-11	4.62043e-09	3.56305	0.531039	5.50584	3.95008	0.151964	0.0366647	0.186439	0.186439
T20D4.12	WBGene00020618	T20D4.12	0.00292593	0.0975631	3.55618	1.19519	2.00636	3.97784	0.112689	0.132527	1.60148	1.60148
C23H3.7	WBGene00006611	tre-5	2.39647e-06	0.000216363	3.52621	0.747594	4.5173	4.23326	0.0613115	0.609365	0.320014	0.609365
T04F8.7b	WBGene00011445	T04F8.7	0.0022281	0.0782111	3.47592	1.13666	2.83149	4.7874	0.400462	1.14993	1.08649	1.14993
F59C6.18	WBGene00206464	F59C6.18	2.99522e-13	9.11703e-11	3.47537	0.47643	4.87921	3.79031	0.0293651	0.193097	0.243017	0.243017
Y17G9A.1	WBGene00006217	str-173	0.000569121	0.0259611	3.47055	1.00715	3.00272	3.74039	0.229877	-0.060582	0.98734	0.98734
F08F3.7	WBGene00000373	cyp-14A5	6.47403e-19	4.59807e-16	3.45679	0.389121	7.51131	3.72109	0.00203623	0.179662	0.151922	0.179662
C06E4.8	WBGene00015537	C06E4.8	1.37256e-08	2.03091e-06	3.45188	0.60807	4.26743	3.62889	0.0517077	0.0206349	0.391991	0.391991
Y17G9A.4	WBGene00021197	Y17G9A.4	2.72557e-20	2.32295e-17	3.44646	0.373429	6.27916	3.58868	0.00833765	0.0253209	0.159001	0.159001
B0213.4	WBGene00003767	nlp-29	9.32567e-09	1.45038e-06	3.42474	0.596378	7.54084	3.83874	0.00170675	0.425093	0.152045	0.425093
M60.7	WBGene00019782	M60.7	7.55286e-14	2.59562e-11	3.42291	0.457737	4.98858	3.66668	0.0241913	0.178203	0.227237	0.227237
F56H11.1c	WBGene00001403	fbl-1	0.00268201	0.0904202	3.41497	1.13756	2.47027	4.29507	0.242053	0.819907	1.3108	1.3108
F54B8.4b	WBGene00010019	F54B8.4	1.49037e-05	0.00113008	3.397	0.784507	5.54	4.01579	0.0609202	0.677622	0.184839	0.677622
C06B3.6.2	WBGene00007365	C06B3.6	4.09447e-09	6.92387e-07	3.37489	0.573928	7.00539	3.71342	0.00422779	0.391045	0.151316	0.391045
F26G1.2b	WBGene00017838	F26G1.2	2.46818e-08	3.45984e-06	3.35703	0.602103	5.89681	3.70716	0.0119005	0.423133	0.169761	0.423133
M162.5	WBGene00010931	M162.5	6.25579e-08	8.02964e-06	3.35263	0.619558	4.85629	3.71751	0.0324757	0.428147	0.24678	0.428147
C39B5.9	WBGene00016527	fbxa-47	0.00149511	0.0569882	3.34938	1.05471	2.7604	3.49075	0.205549	-0.0385506	1.12936	1.12936
F53B6.9	WBGene00009964	fip-6	1.22746e-09	2.3994e-07	3.32675	0.547468	6.35721	3.58994	0.00563484	0.354031	0.157865	0.354031
T16G1.6	WBGene00011800	T16G1.6	6.74363e-05	0.0042637	3.31232	0.831165	4.64952	3.91319	0.0804656	0.748536	0.287669	0.748536
Y39A3A.4	WBGene00021435	Y39A3A.4	1.62658e-09	3.01763e-07	3.2879	0.545141	4.56285	3.32583	0.0482527	0.0620684	0.308362	0.308362
E02C12.6	WBGene00017092	E02C12.6	0.000622819	0.0281153	3.26422	0.954038	3.15132	3.64033	0.185328	0.406385	0.906899	0.906899
F35C11.6	WBGene00009405	F35C11.6	9.99485e-12	2.47628e-09	3.26171	0.4792	5.26207	3.39829	0.0235063	0.252052	0.20069	0.252052
Y50D4B.6	WBGene00021745	Y50D4B.6	3.45466e-08	4.62946e-06	3.25737	0.590458	4.97252	3.49691	0.0217533	0.396616	0.229326	0.396616
B0213.6	WBGene00003769	nlp-31	1.81457e-06	0.000168834	3.24457	0.679769	7.68606	3.57405	0.00173436	0.552769	0.152842	0.552769
T08A9.2	WBGene00020335	ttr-30	2.44919e-08	3.45595e-06	3.23109	0.579376	6.4033	3.43409	0.00661022	0.396202	0.157281	0.396202
C38D9.7	WBGene00008015	fbxa-174	0.000435452	0.0203469	3.2238	0.916473	3.24943	3.14628	0.153477	-0.11558	0.854431	0.854431
EGAP1.3	WBGene00006987	zmp-1	1.46411e-14	5.5707e-12	3.22295	0.419074	5.37768	3.24622	0.0175629	0.155784	0.193185	0.193185
Y43F8C.1	WBGene00003763	nlp-25	1.57189e-07	1.86068e-05	3.19487	0.609251	4.40988	3.39623	0.0491299	0.396294	0.349442	0.396294
W07A12.6	WBGene00012323	oac-54	1.7888e-11	4.28247e-09	3.18478	0.473764	4.89463	3.06659	0.0287695	0.00287966	0.240573	0.240573
C49G7.12a	WBGene00077593	C49G7.12	2.96131e-05	0.00208929	3.17748	0.760814	5.58502	3.21852	0.511785	-0.258986	0.182822	0.182822
C49G7.10a	WBGene00016788	C49G7.10	1.52821e-06	0.000146016	3.15241	0.655725	7.12539	3.0985	0.36489	-0.208626	0.151081	0.151081
B0213.15a	WBGene00015044	cyp-34A9	2.16836e-09	3.88245e-07	3.15171	0.52663	5.73089	2.99871	0.156098	-0.131124	0.17671	0.17671
F16B4.7	WBGene00017509	F16B4.7	0.000708668	0.0310691	3.14215	0.927927	3.20044	3.18034	0.152258	0.138956	0.881	0.881
K02F3.4.1	WBGene00019327	zip-2	0.000621226	0.0281153	3.13934	0.917353	4.19793	3.38802	0.596033	-0.0208543	0.413811	0.413811
K11G9.1	WBGene00019652	K11G9.1	1.05666e-07	1.30897e-05	3.12501	0.587773	4.3841	3.04218	0.0576987	0.0922551	0.356874	0.356874
F01G10.3a	WBGene00001158	ech-9	0.000386007	0.0183996	3.12236	0.879668	3.22662	3.04949	0.0616988	0.104648	0.86688	0.86688
F01G10.3b	WBGene00001158	ech-9	0.000386007	0.0183996	3.12236	0.879668	3.22662	3.04949	0.0616988	0.104648	0.86688	0.86688
F59E11.7b	WBGene00019113	F59E11.7	0.00212128	0.0754559	3.10949	1.01197	3.04125	3.54542	0.26296	0.596696	0.965942	0.965942
F55A12.6	WBGene00018865	F55A12.6	0.000208109	0.0109486	3.10462	0.837057	4.01066	3.52219	0.0444475	0.79635	0.475259	0.79635
F53A9.2	WBGene00018725	kreg-1	2.4704e-05	0.00176634	3.09991	0.735013	4.68523	3.36905	0.035241	0.613052	0.279735	0.613052
F59A7.2	WBGene00019090	F59A7.2	5.99934e-06	0.000494983	3.0881	0.682241	4.36283	3.27982	0.0319736	0.52657	0.363105	0.52657
Y41G9A.10	WBGene00044901	Y41G9A.10	2.50175e-17	1.52299e-14	3.07915	0.363633	6.63813	2.90455	0.00398513	0.0762767	0.15469	0.15469
C09D4.5.1	WBGene00004431	rpl-19	2.51601e-13	7.88363e-11	3.07709	0.420479	6.02837	2.8894	0.0474002	0.0177544	0.164763	0.164763
K02G10.15	WBGene00206361	K02G10.15	1.16495e-09	2.29829e-07	3.07425	0.505218	4.6993	2.88672	0.0295863	0.038976	0.276708	0.276708
C25F9.11	WBGene00045411	C25F9.11	7.12983e-05	0.0044681	3.03443	0.763973	5.24261	3.28763	0.0198084	0.680578	0.202125	0.680578
ZC47.10	WBGene00013842	fbxa-34	6.53374e-09	1.03891e-06	3.0325	0.522621	4.64862	2.88739	0.0398857	0.131537	0.287874	0.287874
F41E7.4	WBGene00009620	fip-5	5.26604e-05	0.00346307	3.01	0.744406	6.3214	3.21676	0.00561196	0.659356	0.15836	0.659356
M199.9	WBGene00044998	M199.9	0.000997567	0.0407187	3.00705	0.913661	5.95313	3.46401	0.00764329	0.994088	0.167411	0.994088
Y54E10BL.2	WBGene00000625	col-48	1.06059e-08	1.63754e-06	2.99567	0.52365	5.64669	2.939	0.0109911	0.31806	0.180183	0.31806
F49E11.10a.1	WBGene00009895	scl-2	1.5587e-15	7.38025e-13	2.99275	0.375398	6.86876	2.80425	0.0170232	0.139348	0.152085	0.152085
C45B11.2	WBGene00008105	C45B11.2	4.38766e-13	1.29844e-10	2.98639	0.412312	5.45363	2.67753	0.014973	-0.0123323	0.189028	0.189028
Y45G5AM.3a.2	WBGene00021556	Y45G5AM.3	7.42785e-15	3.04356e-12	2.96373	0.38109	6.67873	2.70774	0.0200605	0.0767897	0.154215	0.154215
K09D9.1	WBGene00019564	K09D9.1	2.79081e-14	1.02524e-11	2.95694	0.388679	5.82021	2.674	0.0082515	0.059679	0.173034	0.173034
C26F1.2	WBGene00016147	cyp-32A1	2.10513e-13	6.69464e-11	2.95528	0.40252	5.58627	2.64644	0.0116602	0.0234644	0.182766	0.182766
C34C6.7a	WBGene00007919	cup-16	5.1729e-08	6.72067e-06	2.94454	0.540753	4.93601	2.72568	0.116526	0.0495791	0.23437	0.23437
C10C5.2	WBGene00007506	C10C5.2	3.70182e-15	1.64322e-12	2.92443	0.371846	6.21084	2.60457	0.00572294	0.0461204	0.1602	0.1602
F47E1.2	WBGene00018566	F47E1.2	3.86583e-14	1.39609e-11	2.92147	0.38616	5.85789	2.58161	0.00749842	0.020656	0.171445	0.171445
T27F6.8.1	WBGene00012107	T27F6.8	0.000181954	0.00981494	2.91954	0.780035	4.22403	3.04277	0.324587	0.322943	0.405558	0.405558
C34D4.1	WBGene00016397	maph-9	0.000172131	0.00935608	2.91505	0.77595	3.62299	2.65408	0.0741066	0.0656504	0.648411	0.648411
F25B3.4	WBGene00009101	F25B3.4	0.000825021	0.0351575	2.909	0.869848	3.54756	2.79991	0.219379	0.128924	0.688584	0.688584
C54F6.14.1	WBGene00001500	ftn-1	0.000676834	0.0299819	2.8958	0.852007	3.4156	2.87951	0.109489	0.375599	0.76161	0.76161
T12D8.5a	WBGene00011733	T12D8.5	0.00147995	0.0566126	2.87585	0.904756	5.69273	3.21787	0.0901496	0.892151	0.178274	0.892151
F21H7.3	WBGene00009029	F21H7.3	5.65917e-09	9.06616e-07	2.8689	0.492386	5.08116	2.68738	0.0225885	0.268344	0.216508	0.268344
T23F1.5	WBGene00011948	T23F1.5	8.00848e-05	0.00487533	2.86492	0.726373	3.77998	2.49104	0.0624896	-0.0242136	0.570652	0.570652
R08H2.1.1	WBGene00000986	dhs-23	6.81939e-06	0.000550381	2.858	0.635216	4.15254	2.45756	0.0559039	-0.0464114	0.428295	0.428295
H13N06.2	WBGene00010396	H13N06.2	3.10316e-11	7.10957e-09	2.83842	0.427371	5.21786	2.50327	0.0151416	0.0999012	0.204033	0.204033
F09B9.1a	WBGene00008602	oac-14	0.000870053	0.0365645	2.8101	0.844002	4.6457	2.82153	0.566269	0.0371214	0.288538	0.288538
F26G1.2a	WBGene00017838	F26G1.2	2.16741e-06	0.000199918	2.80485	0.592096	4.43996	2.37908	0.0797503	-0.054508	0.340942	0.340942
R07C12.1	WBGene00019931	R07C12.1	8.8953e-08	1.11489e-05	2.79912	0.5234	4.61431	2.5728	0.0329022	0.263459	0.295835	0.295835
T04H1.9	WBGene00006539	tbb-6	1.35591e-08	2.02553e-06	2.79896	0.492873	6.44138	2.56889	0.00338397	0.288125	0.156833	0.288125
T05E7.4	WBGene00020260	T05E7.4	0.00228637	0.079731	2.7691	0.907821	3.25475	2.51191	0.137458	0.144595	0.851509	0.851509
C49G7.8	WBGene00016786	cyp-35A4	0.00072142	0.0313204	2.76627	0.818106	3.48029	2.3011	0.0776581	-0.0704168	0.725498	0.725498
K08H10.1m	WBGene00002263	lea-1	0.00185546	0.0673278	2.72892	0.876778	7.21198	2.92597	0.0581547	0.864332	0.151108	0.864332
F36G9.11	WBGene00009487	clec-232	0.000348185	0.0170546	2.71223	0.758341	3.68908	2.25233	0.0755019	-0.0148719	0.614596	0.614596
Y51A2D.11.2	WBGene00013079	ttr-26	0.000296363	0.0148579	2.70836	0.748484	7.09231	2.70476	0.00902418	0.663249	0.151111	0.663249
ZK1251.2b	WBGene00002090	ins-7	0.000963912	0.0395724	2.68966	0.814838	5.36197	2.76785	0.551197	0.245557	0.194113	0.245557
F35E12.4	WBGene00009428	F35E12.4	1.98574e-07	2.29946e-05	2.67347	0.514062	4.6173	2.22269	0.0219839	0.0826293	0.295128	0.295128
M60.2.1	WBGene00019779	endu-2	0.00045824	0.0213648	2.66258	0.759859	5.94216	2.42156	0.525019	-0.132018	0.167843	0.167843
R11G11.2	WBGene00003648	nhr-58	2.42457e-09	4.26944e-07	2.64888	0.443962	5.06936	2.28236	0.0142698	0.222253	0.217762	0.222253
K05B2.4	WBGene00019404	K05B2.4	4.44525e-05	0.00300682	2.64348	0.64743	4.07904	2.19395	0.0510681	0.0790136	0.451931	0.451931
F41C3.2	WBGene00018268	F41C3.2	8.55915e-12	2.14553e-09	2.64118	0.386767	5.82594	2.14328	0.00671209	0.0606707	0.172794	0.172794
B0218.8	WBGene00015052	clec-52	0.00195655	0.0703034	2.63745	0.851684	3.45261	2.42851	0.129538	0.32601	0.7409	0.7409
F45E1.1.2	WBGene00018462	F45E1.1	2.88587e-07	3.23627e-05	2.61184	0.509056	5.25359	2.07454	0.109657	-0.0722856	0.201309	0.201309
M03A1.8	WBGene00077490	M03A1.8	8.42089e-05	0.00505419	2.60755	0.663145	3.98661	2.05628	0.043692	-0.0217052	0.484022	0.484022
K09D9.2	WBGene00019565	cyp-35A3	7.37755e-10	1.4691e-07	2.59759	0.42184	5.2591	2.08075	0.0126327	0.0627107	0.200906	0.200906
F15D3.8	WBGene00008858	pals-1	9.2455e-05	0.00548305	2.59009	0.662498	4.01019	2.12147	0.0512562	0.0939449	0.475428	0.475428
C45B2.2	WBGene00016659	C45B2.2	8.37224e-05	0.00503919	2.58947	0.658315	5.509	2.40165	0.00817486	0.511879	0.186288	0.511879
C32D5.8b	WBGene00016316	C32D5.8	1.09117e-05	0.000851629	2.55574	0.581079	7.63949	2.26344	0.0104249	0.394759	0.152551	0.394759
T02B11.4	WBGene00020156	T02B11.4	5.5656e-05	0.00358267	2.55056	0.632814	4.09107	2.09529	0.0324872	0.159081	0.448057	0.448057
F58H10.1	WBGene00010291	F58H10.1	1.59044e-09	2.9989e-07	2.53445	0.419965	5.24907	2.03051	0.0100022	0.127967	0.201642	0.201642
C33G8.2	WBGene00016360	C33G8.2	7.48735e-08	9.49601e-06	2.52781	0.469935	5.79731	2.1157	0.0079905	0.257016	0.173985	0.257016
K11D12.4	WBGene00019644	cpt-4	5.44621e-07	5.70171e-05	2.52296	0.503597	4.68236	2.08201	0.023972	0.205898	0.28036	0.28036
T24H10.7c	WBGene00012005	jun-1	0.00020424	0.0107984	2.48298	0.668596	4.1779	2.05092	0.116239	0.152251	0.420186	0.420186
K11D12.3a	WBGene00005655	srr-4	5.09777e-11	1.14335e-08	2.46865	0.375858	6.12553	1.85031	0.00747337	0.0219046	0.16205	0.16205
R11G11.14	WBGene00020016	lipl-3	9.26088e-05	0.00548305	2.45258	0.627388	4.15136	1.86333	0.0436663	0.0347242	0.428673	0.428673
T07H3.3	WBGene00020326	math-38	5.50988e-05	0.00356461	2.45159	0.607902	4.21548	1.90871	0.0351976	0.105628	0.408256	0.408256
Y45G5AM.3a.1	WBGene00021556	Y45G5AM.3	0.00221494	0.0781201	2.44284	0.798369	5.10978	2.36389	0.31666	0.448212	0.213595	0.448212
W02D9.10	WBGene00012216	W02D9.10	7.93105e-05	0.00486994	2.4362	0.617309	6.34099	2.12348	0.00385859	0.453426	0.158084	0.453426
T05E12.3	WBGene00011486	T05E12.3	2.5783e-11	6.03692e-09	2.42942	0.364294	6.53942	1.85893	0.00348911	0.114244	0.155763	0.155763
C15H11.2a	WBGene00007614	gnrr-2	0.000753618	0.0323737	2.42441	0.719561	5.47058	1.88997	0.433155	-0.264307	0.188167	0.188167
Y48B6A.6b	WBGene00012980	efhd-1	0.000668412	0.0297325	2.4212	0.711652	4.95926	1.79366	0.376628	-0.329967	0.231111	0.231111
T04C12.8.1	WBGene00011430	T04C12.8	0.00170872	0.0633177	2.39283	0.762854	4.2609	2.10333	0.304316	0.20987	0.39402	0.39402
C24B9.9	WBGene00016052	dod-3	7.69952e-08	9.70732e-06	2.38082	0.443024	5.17006	1.87714	0.0164289	0.219095	0.208	0.219095
Y44E3B.2	WBGene00021553	tyr-5	6.8519e-06	0.000550919	2.37989	0.529073	4.54153	1.78742	0.0221497	0.0955192	0.313752	0.313752
F53A10.2d.1	WBGene00018734	F53A10.2	0.00151647	0.0574935	2.37974	0.750348	5.13504	1.93227	0.464463	-0.153367	0.211164	0.211164
M01H9.1	WBGene00019717	trx-3	2.54985e-05	0.00181705	2.37871	0.564968	4.38294	1.7949	0.0258145	0.104075	0.357213	0.357213
C13G3.1	WBGene00007553	C13G3.1	6.16962e-10	1.24015e-07	2.34353	0.378842	5.9494	1.66707	0.00466825	0.0212443	0.167557	0.167557
T05C12.10	WBGene00004264	qua-1	0.0018536	0.0673278	2.33919	0.75149	3.80509	1.91936	0.118589	0.251828	0.559097	0.559097
C14B1.3	WBGene00007574	C14B1.3	6.46712e-11	1.42305e-08	2.33263	0.35708	7.00346	1.65687	0.00168469	0.0310026	0.151323	0.151323
F20D1.5	WBGene00000191	arl-7	6.15632e-05	0.00392732	2.31906	0.57879	4.3345	1.65874	0.0304685	0.0299741	0.371529	0.371529
C07G3.2	WBGene00015574	irg-1	1.45653e-06	0.000140427	2.28915	0.475213	4.81669	1.60729	0.0173431	0.0296241	0.253649	0.253649
T03D8.6b	WBGene00011393	T03D8.6	0.00166026	0.0618445	2.28812	0.727516	4.8276	1.92871	0.383423	0.0939962	0.251712	0.251712
T07C4.9a	WBGene00003589	nex-2	1.49703e-09	2.89975e-07	2.24645	0.37164	7.76698	1.55909	0.0123143	0.0478671	0.153425	0.153425
T10D4.3	WBGene00020407	chil-24	8.30912e-09	1.31143e-06	2.24129	0.388973	5.74684	1.59605	0.00550284	0.113212	0.176057	0.176057
T20D4.10	WBGene00020616	T20D4.10	0.000199282	0.0105888	2.23571	0.60101	4.23215	1.56287	0.0304507	0.0540204	0.403005	0.403005
ZC239.22	WBGene00194717	ZC239.22	0.00252221	0.0861142	2.23305	0.739257	4.57929	1.9878	0.020257	0.635545	0.304284	0.635545
F44F4.4	WBGene00004222	ptr-8	1.74539e-08	2.5472e-06	2.23234	0.396121	6.23807	1.63623	0.0041976	0.184096	0.159696	0.184096
F53H2.2	WBGene00010005	cnc-7	6.29551e-05	0.00400413	2.23054	0.557433	4.75823	1.77225	0.0170884	0.355789	0.264635	0.355789
W02D7.2	WBGene00020938	clec-218	0.00151516	0.0574935	2.22868	0.702664	6.14759	1.93447	0.00426535	0.588219	0.161529	0.588219
F53F1.6b	WBGene00009984	F53F1.6	4.74435e-05	0.00317886	2.22707	0.547477	4.48519	1.63052	0.0311425	0.158951	0.328535	0.328535
C35A5.2	WBGene00007946	ugt-33	0.000977525	0.0400541	2.22695	0.675465	3.93432	1.49025	0.0434489	-0.0401717	0.504055	0.504055
B0280.2	WBGene00015100	B0280.2	0.000265962	0.0135247	2.22569	0.610383	4.20315	1.61465	0.0349246	0.136472	0.412156	0.412156
T27E4.7	WBGene00020865	T27E4.7	4.85342e-06	0.000405654	2.22257	0.486229	5.89573	1.69472	0.00477943	0.278923	0.169808	0.278923
F58E2.3	WBGene00019047	F58E2.3	9.28838e-05	0.00548305	2.21932	0.567825	4.36989	1.53699	0.0258822	0.0532852	0.361028	0.361028
C34C6.7b	WBGene00007919	cup-16	0.0001488	0.00827803	2.21147	0.58303	4.62435	1.77311	0.112516	0.295394	0.293472	0.295394
E04D5.4a	WBGene00008483	E04D5.4	2.08248e-05	0.00153534	2.20809	0.518835	4.95464	1.70497	0.0220639	0.300964	0.231746	0.300964
F09C6.13	WBGene00044183	F09C6.13	0.00121172	0.0479002	2.19952	0.67968	4.2718	1.86713	0.026337	0.528021	0.390638	0.528021
Y73B6BL.1	WBGene00022231	tyr-6	7.60152e-05	0.00468108	2.19454	0.554648	6.33732	1.72167	0.00322337	0.365938	0.158135	0.365938
T23F11.6	WBGene00011957	T23F11.6	0.00026579	0.0135247	2.1926	0.601282	4.63051	1.76764	0.0210584	0.41279	0.292035	0.41279
F55H2.1b	WBGene00004933	sod-4	1.1593e-05	0.000898222	2.19177	0.499823	4.751	1.45603	0.0337243	-0.0139053	0.266063	0.266063
T10B9.2	WBGene00011672	cyp-13A5	1.98553e-05	0.00147407	2.18729	0.512665	5.88684	1.67182	0.00600168	0.309389	0.170197	0.309389
F54C9.11	WBGene00010045	F54C9.11	1.56179e-06	0.000148558	2.18428	0.454759	4.93942	1.51179	0.0142865	0.0930027	0.233881	0.233881
F47B8.2	WBGene00009803	F47B8.2	2.53019e-09	4.41891e-07	2.18172	0.366092	6.3659	1.47717	0.00307743	0.0625177	0.15775	0.15775
F35G8.2	WBGene00044788	ttr-38	4.21946e-07	4.58694e-05	2.17833	0.430604	5.11115	1.58866	0.00904399	0.211119	0.21346	0.21346
Y54F10BL.1	WBGene00044676	fbxa-42	0.000351893	0.0171574	2.17799	0.609439	4.18383	1.49053	0.0274037	0.0625175	0.418296	0.418296
T23G11.6c.1	WBGene00011971	lron-9	0.000679311	0.0300292	2.17765	0.640902	4.72749	1.79233	0.0554848	0.437421	0.270809	0.437421
C05B5.8	WBGene00007324	C05B5.8	4.25299e-09	7.13531e-07	2.16897	0.369247	6.26426	1.52474	0.00436733	0.146852	0.159244	0.159244
R11F4.3	WBGene00020009	R11F4.3	2.60386e-08	3.59909e-06	2.16893	0.389663	5.72345	1.4751	0.00519049	0.0799022	0.177014	0.177014
C45E1.4	WBGene00016663	C45E1.4	2.32431e-05	0.00169024	2.16609	0.511931	4.6189	1.51911	0.0197362	0.128969	0.294752	0.294752
K04E7.3	WBGene00003551	nas-33	0.00294632	0.0976318	2.15213	0.723823	3.83892	1.86103	0.0518011	0.576903	0.543957	0.576903
W02F12.2	WBGene00020947	W02F12.2	0.000279544	0.0141143	2.1467	0.590798	5.40194	1.69663	0.0101677	0.408683	0.1918	0.408683
F13D12.3	WBGene00008739	F13D12.3	1.87084e-09	3.40701e-07	2.1419	0.35647	7.14492	1.40815	0.00141028	0.0410388	0.151074	0.151074
C34B7.3	WBGene00007913	cyp-36A1	3.70711e-05	0.00255623	2.11788	0.513425	6.28385	1.58287	0.00421046	0.312115	0.158927	0.312115
C28A5.3	WBGene00003590	nex-3	9.23445e-09	1.44675e-06	2.11405	0.36803	6.2893	1.41679	0.00369423	0.0976823	0.158841	0.158841
C46H11.4b	WBGene00002979	lfe-2	0.00135524	0.0525019	2.11367	0.659693	5.07367	1.73195	0.212957	0.309277	0.2173	0.309277
K09F6.13	WBGene00235164	K09F6.13	0.000426833	0.020032	2.09944	0.595938	4.2472	1.58898	0.0278817	0.327703	0.398289	0.398289
B0334.3a.1	WBGene00007143	B0334.3	0.00295142	0.0976489	2.0975	0.705576	7.08592	1.76791	0.235977	0.361427	0.151119	0.361427
F15G9.1b	WBGene00008865	F15G9.1	0.00238404	0.0824622	2.09344	0.689156	5.74218	1.74219	0.0600188	0.509904	0.176248	0.509904
W06A11.1	WBGene00021052	W06A11.1	0.000429435	0.0201098	2.0872	0.592737	4.26221	1.43213	0.0279931	0.138945	0.393611	0.393611
K02D7.5	WBGene00019300	swt-1	1.43182e-07	1.71392e-05	2.08221	0.395774	5.5931	1.32941	0.00549593	0.0328029	0.182469	0.182469
R06C1.6	WBGene00011060	R06C1.6	1.99883e-07	2.30211e-05	2.08026	0.400093	5.53252	1.32576	0.00690562	0.0297826	0.185184	0.185184
Y43C5A.3	WBGene00012783	Y43C5A.3	3.07001e-08	4.16642e-06	2.07948	0.375534	6.02157	1.37787	0.00424967	0.103221	0.164981	0.164981
T24E12.5	WBGene00020774	T24E12.5	0.000718096	0.0313204	2.0702	0.612018	5.30434	1.62282	0.00931525	0.440164	0.197754	0.440164
C52E4.1	WBGene00000781	cpr-1	4.20053e-08	5.52474e-06	2.06166	0.376064	8.75736	1.39995	0.000318891	0.16611	0.16939	0.16939
T23B12.11	WBGene00044553	T23B12.11	2.61819e-08	3.59909e-06	2.05834	0.369858	6.20117	1.31809	0.00376533	0.0589841	0.160388	0.160388
C50F7.5	WBGene00016845	C50F7.5	5.87831e-05	0.00376124	2.04993	0.510232	5.80616	1.49497	0.00620043	0.306204	0.173619	0.306204
D1005.3.1	WBGene00016997	cebp-1	0.000120642	0.00683648	2.04244	0.531218	5.17323	1.34935	0.130907	-0.000396289	0.207725	0.207725
C17H12.10	WBGene00015935	C17H12.10	0.002435	0.0836816	2.03683	0.671932	3.93608	1.49238	0.0384309	0.291941	0.50336	0.50336
H01A20.1	WBGene00003602	nhr-3	3.23455e-08	4.36193e-06	2.03569	0.368234	6.27466	1.26473	0.00364214	0.025059	0.159074	0.159074
C10H11.6a	WBGene00015695	ugt-26	6.01683e-06	0.000494983	2.02962	0.448456	6.23844	1.41681	0.01377	0.227565	0.159689	0.227565
Y48G9A.10	WBGene00021703	cpt-3	4.86447e-05	0.00324913	2.02636	0.498853	4.6731	1.32866	0.0162336	0.112846	0.282392	0.282392
ZC443.3	WBGene00013898	ZC443.3	4.39615e-05	0.00298308	2.02494	0.495629	5.6665	1.4512	0.00674382	0.288033	0.179357	0.288033
C08F8.8	WBGene00003657	nhr-67	1.39645e-06	0.000136487	2.02058	0.418729	5.25638	1.24113	0.00929658	0.0124398	0.201104	0.201104
T09E11.11	WBGene00011660	T09E11.11	0.000145164	0.00811813	2.02054	0.531833	4.51232	1.24136	0.0180944	0.00401625	0.321322	0.321322
D1014.1	WBGene00006309	sul-2	1.67346e-05	0.00125994	2.0197	0.469205	4.83285	1.38721	0.0133944	0.204533	0.25079	0.25079
F35F10.13	WBGene00018062	F35F10.13	0.00175721	0.0646648	2.01104	0.642818	4.05044	1.23508	0.0344592	-0.00539815	0.461399	0.461399
F22B7.9	WBGene00017698	F22B7.9	3.00021e-08	4.09779e-06	2.01032	0.362781	6.55899	1.21998	0.00237721	0.00770154	0.155555	0.155555
R13A5.3	WBGene00020047	ttr-32	0.0007248	0.0313888	2.00489	0.593159	6.47556	1.52253	0.00270017	0.419504	0.156451	0.419504
C49F8.1	WBGene00008213	C49F8.1	0.000378742	0.0181925	1.99403	0.560992	4.37016	1.20675	0.0167085	0.00182339	0.360946	0.360946
ZC443.4	WBGene00013899	ZC443.4	3.50099e-06	0.000300788	1.97122	0.424924	5.18303	1.25457	0.00978798	0.108688	0.206885	0.206885
Y71H2AM.16	WBGene00022181	pho-9	1.40396e-06	0.000136594	1.94622	0.403408	6.0423	1.28279	0.00464023	0.190645	0.164328	0.190645
F09G2.3	WBGene00017312	pitr-5	0.00174971	0.0645002	1.9454	0.621588	4.14224	1.34498	0.0320476	0.247433	0.431598	0.431598
R07G3.8	WBGene00019944	R07G3.8	8.3302e-06	0.00065982	1.93464	0.434115	5.09746	1.23573	0.0113191	0.139191	0.214828	0.214828
C29F7.2a	WBGene00007811	C29F7.2	8.45375e-07	8.53668e-05	1.93217	0.392352	6.87278	1.25853	0.0252936	0.159435	0.152054	0.159435
F28H7.8	WBGene00009241	F28H7.8	5.6053e-06	0.000464716	1.92769	0.424532	5.20806	1.18429	0.0114574	0.0811975	0.204815	0.204815
F10D7.3	WBGene00017340	F10D7.3	1.93966e-07	2.25838e-05	1.92707	0.370233	6.16097	1.14946	0.00325894	0.0439134	0.161228	0.161228
T05C1.1	WBGene00020248	T05C1.1	0.000151848	0.0084037	1.92676	0.508644	4.62794	1.15628	0.0178294	0.0389241	0.292633	0.292633
M60.4b.2	WBGene00019780	M60.4	0.000747599	0.03218	1.90924	0.566288	7.17694	1.38217	0.00684233	0.377976	0.15108	0.377976
F44G3.6	WBGene00004809	skr-3	1.08757e-07	1.33947e-05	1.89634	0.357029	7.4884	1.1463	0.00112758	0.0888282	0.151836	0.151836
T24H10.7d	WBGene00012005	jun-1	0.000118937	0.00675783	1.89214	0.49168	4.78335	1.24128	0.0303074	0.192664	0.259792	0.259792
T06D8.10	WBGene00011530	T06D8.10	0.00252941	0.0861142	1.89145	0.62635	4.16003	1.42636	0.0371779	0.433599	0.425895	0.433599
Y53C12B.7	WBGene00013146	Y53C12B.7	0.00168927	0.0628153	1.8817	0.599259	4.22287	1.38203	0.0250097	0.401378	0.405924	0.405924
Y48E1B.9a	WBGene00013008	clec-146	1.9696e-06	0.000182462	1.88016	0.395281	6.0337	1.07951	0.0229022	0.00243737	0.164594	0.164594
C04F12.3	WBGene00002069	ikb-1	1.39553e-05	0.00106576	1.8771	0.432057	5.09791	1.17444	0.0092264	0.147288	0.214782	0.214782
F17H10.2a	WBGene00008926	F17H10.2	0.000326613	0.0161841	1.86764	0.519767	4.96874	1.14768	0.0943588	0.0406526	0.22983	0.22983
F53B2.8	WBGene00009957	F53B2.8	1.69206e-07	1.99187e-05	1.86555	0.35668	7.01375	1.12597	0.00137727	0.107804	0.151287	0.151287
C34F11.8	WBGene00016417	C34F11.8	4.59909e-06	0.00038886	1.8655	0.407111	5.43917	1.09394	0.00910599	0.0574436	0.189781	0.189781
Y39G10AR.6	WBGene00021464	ugt-31	7.82342e-06	0.000624321	1.8626	0.416692	5.26629	1.1188	0.00797279	0.0960584	0.200386	0.200386
ZC47.14	WBGene00013845	fbxa-37	0.000113406	0.00649552	1.85843	0.481464	4.77136	1.22382	0.0160877	0.234161	0.262081	0.262081
F38B7.2b	WBGene00009533	F38B7.2	0.000278497	0.0140949	1.83496	0.504871	4.65675	1.05233	0.019838	0.0364372	0.286035	0.286035
F52E4.5	WBGene00018702	F52E4.5	6.9373e-07	7.0724e-05	1.83465	0.369656	6.18514	1.02474	0.00326293	0.0166873	0.160712	0.160712
C03G6.15	WBGene00015400	cyp-35A2	2.6757e-07	3.01646e-05	1.83347	0.356363	7.33169	1.01103	0.00105323	0.00233676	0.15134	0.15134
T08A9.11b	WBGene00020339	ttr-59	5.43318e-07	5.70171e-05	1.79963	0.359183	6.79357	1.08475	0.00202541	0.148835	0.15279	0.15279
ZK909.3	WBGene00014148	ZK909.3	9.46921e-07	9.47232e-05	1.79301	0.365745	6.37107	1.02307	0.0028396	0.0752945	0.157683	0.157683
B0218.2	WBGene00015048	faah-2	0.000542468	0.0249641	1.7885	0.517079	7.27996	1.20026	0.00107701	0.319768	0.151217	0.319768
T28A11.19	WBGene00020881	T28A11.19	0.000730302	0.031563	1.7866	0.528902	4.52438	1.15258	0.0175137	0.242482	0.318171	0.318171
F21G4.5	WBGene00009026	F21G4.5	7.59276e-05	0.00468108	1.77351	0.448206	4.9636	1.08431	0.0105461	0.177064	0.23052	0.23052
F15B9.1	WBGene00001387	far-3	0.000628704	0.0283209	1.75177	0.512375	6.72773	1.15688	0.00170789	0.313325	0.153596	0.313325
W05B10.4	WBGene00012279	W05B10.4	0.00197539	0.0708579	1.7471	0.56469	4.36773	0.960178	0.0209881	0.0383101	0.361661	0.361661
Y54G2A.36.1	WBGene00021898	Y54G2A.36	0.000419379	0.0197546	1.74562	0.494849	5.47846	0.989174	0.106077	-0.00605119	0.187773	0.187773
T19C3.9	WBGene00020566	ttr-7	3.74036e-05	0.00257083	1.74306	0.422769	5.19985	1.02996	0.00899763	0.148986	0.205483	0.205483
F25E5.5	WBGene00017786	F25E5.5	0.00217791	0.0772126	1.73695	0.566735	5.4385	1.19416	0.0076266	0.377799	0.189816	0.377799
C11G10.1	WBGene00007525	C11G10.1	5.31101e-05	0.0034819	1.73683	0.429749	5.11821	1.01425	0.00885112	0.136845	0.21277	0.21277
F20D6.10	WBGene00017639	F20D6.10	0.00186434	0.0673278	1.71723	0.55198	4.41324	0.914213	0.0171356	0.0222673	0.348482	0.348482
C54G10.4b.2	WBGene00008320	slc-25A29	0.000108561	0.00626861	1.70817	0.441318	5.33444	0.935683	0.0379093	0.0425276	0.195805	0.195805
Y39C12A.1	WBGene00012704	mlt-3	3.65774e-05	0.00253037	1.70746	0.41362	5.31477	0.905257	0.00823163	0.0326026	0.197066	0.197066
C46H11.4a	WBGene00002979	lfe-2	0.000588693	0.0267447	1.70523	0.496171	4.83409	0.937135	0.0448482	0.041547	0.250574	0.250574
Y51A2D.13a	WBGene00013080	Y51A2D.13	0.00253408	0.0861142	1.70425	0.564462	7.34336	1.15809	0.000857275	0.381483	0.151371	0.381483
DY3.6	WBGene00008439	mfb-1	3.37594e-06	0.000291219	1.69782	0.365396	6.34857	0.917069	0.00223676	0.0674875	0.15798	0.15798
C33A12.19a	WBGene00007890	C33A12.19	1.23242e-05	0.000951021	1.69559	0.38785	5.77221	0.986299	0.00549461	0.159558	0.175019	0.175019
F17C11.11a	WBGene00008922	F17C11.11	3.01808e-06	0.00026355	1.67057	0.357755	7.34065	0.895116	0.00222245	0.074946	0.151364	0.151364
VK10D6R.1	WBGene00012152	cnc-10	0.00265579	0.0896986	1.66843	0.555218	6.1061	1.11254	0.00381965	0.366101	0.162536	0.366101
C04F12.8	WBGene00007302	C04F12.8	4.34587e-05	0.00295838	1.66511	0.407288	5.37997	0.837658	0.00600872	0.00183683	0.193051	0.193051
K02D10.4	WBGene00019304	K02D10.4	0.000238051	0.0123711	1.65786	0.451144	5.59779	1.00773	0.00661091	0.237626	0.182265	0.237626
F43C11.7	WBGene00018384	F43C11.7	2.17207e-05	0.00158494	1.64195	0.386667	5.78629	0.846496	0.00497383	0.0452851	0.174439	0.174439
M199.4	WBGene00010953	clec-190	5.49585e-06	0.000457422	1.61964	0.356364	7.31272	0.787774	0.00110306	-3.66852e-05	0.151292	0.151292
W06H8.2	WBGene00021066	W06H8.2	0.00139345	0.0538842	1.61953	0.506737	4.6234	0.898644	0.0144444	0.134592	0.293694	0.293694
K11G9.5	WBGene00019655	K11G9.5	0.00155812	0.0586788	1.61489	0.510455	4.61736	0.795643	0.0175636	0.00013891	0.295114	0.295114
Y32F6B.3	WBGene00012532	crp-1	3.02963e-05	0.00212343	1.61486	0.387142	5.76181	0.795866	0.00441026	0.0136366	0.175445	0.175445
F46C5.10	WBGene00009785	F46C5.10	5.12417e-05	0.0033907	1.61326	0.398348	5.54563	0.809504	0.0058361	0.0324525	0.184581	0.184581
F32A11.6	WBGene00003388	moe-3	0.000223169	0.011626	1.61201	0.436713	5.68228	0.951217	0.00537783	0.223484	0.178704	0.223484
C36E8.2	WBGene00007981	glb-11	0.00071889	0.0313204	1.60529	0.47462	4.79815	0.937908	0.013292	0.206465	0.257025	0.257025
H28G03.5	WBGene00023313	H28G03.5	0.00224963	0.0787373	1.58625	0.519208	4.63298	0.918435	0.0320301	0.186078	0.291462	0.291462
M163.1	WBGene00010935	M163.1	9.58883e-06	0.000753908	1.57664	0.356202	7.10653	0.758606	0.00116069	0.0160016	0.151095	0.151095
F15E6.3	WBGene00017484	F15E6.3	0.00183816	0.0670644	1.57181	0.504559	6.0605	0.970293	0.00304181	0.302454	0.163784	0.302454
E03H4.8	WBGene00008476	E03H4.8	4.32185e-05	0.00295838	1.56523	0.382737	5.85056	0.790047	0.00402823	0.0693924	0.171757	0.171757
ZC455.5a	WBGene00013905	ugt-4	0.00122893	0.0484902	1.56512	0.484247	5.46316	0.908372	0.092853	0.138463	0.188541	0.188541
C13C12.1a	WBGene00000285	cal-1	0.000344555	0.0169548	1.55669	0.434919	5.12253	0.80213	0.0146333	0.0855569	0.212352	0.212352
F08B1.1b.2	WBGene00006923	vhp-1	6.6378e-05	0.00420927	1.55644	0.390192	6.67105	0.863775	0.0213593	0.16134	0.154307	0.16134
F53F4.5a	WBGene00001479	fmo-4	3.33448e-05	0.00232182	1.55097	0.373787	6.43721	0.751243	0.010779	0.0286811	0.156881	0.156881
H32C10.2a	WBGene00003019	lin-33	0.00230109	0.0801134	1.54886	0.508099	6.01482	0.736647	0.144597	-0.121987	0.165201	0.165201
F43H9.4	WBGene00018400	F43H9.4	0.000111236	0.00638845	1.54258	0.39915	5.52887	0.743291	0.00583174	0.0333962	0.185353	0.185353
C08D8.2b	WBGene00006582	tmd-2	0.000207816	0.0109486	1.54231	0.415793	5.30089	0.805182	0.00947567	0.112612	0.197985	0.197985
T01G5.1	WBGene00011339	T01G5.1	0.00219853	0.0777333	1.53832	0.502389	4.65286	0.81039	0.0159601	0.117985	0.286914	0.286914
T28C12.4a.2	WBGene00020891	T28C12.4	0.000168856	0.00920157	1.5378	0.408821	5.98435	0.751659	0.0343131	0.021962	0.166248	0.166248
F58G1.7	WBGene00010269	F58G1.7	0.000349751	0.0170921	1.53273	0.428692	5.15892	0.82169	0.0115498	0.144337	0.208982	0.208982
CD4.2	WBGene00000795	crn-2	1.97479e-05	0.00147122	1.52657	0.3577	6.87714	0.739324	0.00151934	0.0520845	0.15202	0.15202
T14F9.4a	WBGene00003968	peb-1	0.00290357	0.0971216	1.52522	0.512203	4.8868	0.715822	0.0730169	-0.0491063	0.241805	0.241805
D1046.5a	WBGene00008366	tpra-1	0.00165476	0.0618445	1.51723	0.482262	5.48403	0.899917	0.0108752	0.268216	0.187497	0.268216
F16B4.4	WBGene00017506	F16B4.4	5.7586e-05	0.00369574	1.50968	0.375309	8.32483	0.810508	0.000387011	0.168641	0.160308	0.168641
ZK822.1	WBGene00014089	ZK822.1	0.00225048	0.0787373	1.48536	0.486203	4.72527	0.871305	0.0124073	0.266818	0.271265	0.271265
ZK84.1	WBGene00022649	ZK84.1	0.000188698	0.010102	1.48394	0.397448	5.5742	0.752299	0.00625958	0.115968	0.183298	0.183298
C25B8.6	WBGene00003710	nhr-120	0.00183239	0.0669687	1.48283	0.475855	4.7892	0.694872	0.013034	0.0339505	0.258692	0.258692
C15H9.1	WBGene00003778	nnt-1	0.00263496	0.0893997	1.47752	0.491297	4.69267	0.676024	0.0115184	0.016616	0.278128	0.278128
Y48B6A.6a.2	WBGene00012980	efhd-1	0.000419996	0.0197546	1.46076	0.414143	5.83005	0.689988	0.0331948	0.0332615	0.172622	0.172622
F18G5.6	WBGene00017582	F18G5.6	0.00285634	0.0959939	1.45781	0.48874	6.64012	0.85254	0.00175946	0.28488	0.154667	0.28488
T20D4.11	WBGene00020617	T20D4.11	0.00296041	0.0977947	1.45051	0.488089	4.72098	0.668982	0.0137266	0.0366553	0.27215	0.27215
D1005.3.2	WBGene00016997	cebp-1	0.000262293	0.0134021	1.45044	0.397388	5.86198	0.767879	0.0182302	0.164093	0.17127	0.17127
W01F3.2	WBGene00012185	W01F3.2	8.31618e-05	0.00501963	1.41829	0.360419	7.97789	0.642263	0.000453596	0.0512831	0.155429	0.155429
R13H4.5	WBGene00011263	R13H4.5	0.000909498	0.037923	1.41024	0.425138	5.15265	0.605909	0.00734601	0.00502628	0.209545	0.209545
W06A7.3g.1	WBGene00004336	ret-1	0.000162894	0.00896843	1.40246	0.371952	7.01337	0.644917	0.0147289	0.0584049	0.151289	0.151289
F46B6.8	WBGene00009773	lipl-2	0.000257177	0.013204	1.39885	0.382723	5.85304	0.715575	0.00412033	0.167264	0.171652	0.171652
F55A12.9c	WBGene00004131	pqn-44	0.00016731	0.00914071	1.39635	0.370989	7.38194	0.67376	0.0136755	0.104754	0.151484	0.151484
F56B6.4a	WBGene00006863	gyg-1	0.000721751	0.0313204	1.37296	0.406058	5.5553	0.698348	0.0137174	0.16341	0.184142	0.184142
C10H11.4	WBGene00015693	ugt-28	0.000241105	0.0124531	1.36208	0.370984	6.12562	0.673212	0.00310726	0.152407	0.162048	0.162048
T10H4.11	WBGene00011699	cyp-34A2	0.0028927	0.0969099	1.35714	0.455583	4.89673	0.589366	0.00882187	0.0402638	0.240245	0.240245
F08B12.4a	WBGene00008572	F08B12.4	0.000173437	0.00937922	1.34598	0.358464	7.10557	0.608036	0.00309985	0.0829469	0.151096	0.151096
F08B12.4b.1	WBGene00008572	F08B12.4	0.000173437	0.00937922	1.34598	0.358464	7.10557	0.608036	0.00309985	0.0829469	0.151096	0.151096
C18H9.6	WBGene00016004	C18H9.6	0.000192011	0.0102536	1.34245	0.359973	6.706	0.573151	0.00161931	0.0417144	0.153878	0.153878
C08F11.13c.1	WBGene00007460	C08F11.13	0.00303231	0.099706	1.33847	0.451507	5.33199	0.568666	0.048672	-0.00704897	0.195959	0.195959
C05E4.9a.1	WBGene00001564	icl-1	0.000259052	0.0132683	1.33808	0.366281	8.3345	0.586951	0.000520336	0.0659028	0.160474	0.160474
ZC581.1	WBGene00022631	nekl-2	0.0012527	0.0492459	1.31447	0.407385	5.39826	0.613527	0.00714878	0.119756	0.192006	0.192006
F46G10.2.1	WBGene00009797	F46G10.2	0.00124534	0.0490472	1.30481	0.404181	5.43508	0.589365	0.00603781	0.0987697	0.189997	0.189997
Y73F8A.6	WBGene00000370	ccg-1	0.000332012	0.0163754	1.29933	0.362035	8.09776	0.540023	0.000396868	0.044333	0.156887	0.156887
C33G8.3	WBGene00016361	drd-10	0.00111418	0.0446238	1.29349	0.396779	6.52188	0.643629	0.00205724	0.186863	0.15595	0.186863
T19B4.1	WBGene00020556	pamn-1	0.00155872	0.0586788	1.29229	0.408498	6.51494	0.651189	0.00211771	0.198127	0.156025	0.198127
W08D2.4a	WBGene00001395	fat-3	0.000921641	0.0383543	1.29107	0.389648	6.91078	0.631464	0.0304074	0.144804	0.151783	0.151783
C42D4.1.2	WBGene00016594	C42D4.1	0.000663281	0.0295659	1.2831	0.376902	8.76547	0.537227	0.000871329	0.0568975	0.169594	0.169594
C52A10.1	WBGene00016862	C52A10.1	0.000384372	0.0183996	1.28124	0.360853	6.64711	0.534989	0.0016705	0.0550194	0.154587	0.154587
Y57G11C.31	WBGene00013321	Y57G11C.31	0.000650291	0.02917	1.27816	0.374858	6.00012	0.508442	0.00292675	0.0215171	0.165696	0.165696
Y49G5A.1	WBGene00021731	Y49G5A.1	0.00102541	0.0417753	1.27778	0.389157	5.73132	0.564615	0.00503934	0.0946918	0.176692	0.176692
F28D1.5.1	WBGene00009215	thn-2	0.000686015	0.0302628	1.27347	0.375089	7.63274	0.613139	0.0016118	0.167218	0.152512	0.167218
W05H9.1a	WBGene00021048	W05H9.1	0.000410548	0.019439	1.27274	0.360221	7.93157	0.569042	0.000782825	0.109996	0.154928	0.154928
K07C11.5.1	WBGene00019478	cri-2	0.00102865	0.0418274	1.26263	0.384647	6.31655	0.606972	0.019114	0.152488	0.15843	0.15843
F40F8.7.1	WBGene00004096	pqm-1	0.00092555	0.0384419	1.26131	0.380803	6.10244	0.480694	0.0113825	-0.00681516	0.16263	0.16263
K01C8.1.2	WBGene00010456	K01C8.1	0.000413377	0.0195295	1.26042	0.356918	7.05484	0.572621	0.00169294	0.126342	0.151175	0.151175
F56D1.5	WBGene00000969	dhs-5	0.00241351	0.0833462	1.2409	0.409002	5.35879	0.467583	0.0064356	0.00107097	0.194304	0.194304
ZK1055.6b	WBGene00022847	ZK1055.6	0.00292433	0.0975631	1.19381	0.401203	5.51781	0.488753	0.00728595	0.0743103	0.18587	0.18587
T28H10.3	WBGene00012144	T28H10.3	0.00114384	0.0455548	1.17975	0.362717	8.14451	0.520498	0.000357084	0.136919	0.157519	0.157519
Y37A1A.2	WBGene00012535	Y37A1A.2	0.00200636	0.0717273	1.17658	0.380857	5.86342	0.462972	0.00285372	0.0607091	0.171209	0.171209
M79.2	WBGene00010902	M79.2	0.00143488	0.0552036	1.17269	0.367897	6.24457	0.499886	0.00283688	0.1136	0.159581	0.159581
B0457.6	WBGene00007180	B0457.6	0.00140473	0.0542219	1.17151	0.366822	6.25816	0.428601	0.00212343	0.0203688	0.159347	0.159347
C25E10.12	WBGene00016101	C25E10.12	0.00278676	0.0938032	1.16418	0.389315	5.70276	0.410205	0.00401808	0.000794806	0.177862	0.177862
K10G9.1	WBGene00010755	vglu-2	0.00147148	0.0564078	1.1458	0.360286	6.6713	0.440586	0.00146311	0.0608424	0.154304	0.154304
F28C10.3	WBGene00017898	F28C10.3	0.00174593	0.0644723	1.14426	0.365536	7.27238	0.513053	0.000833988	0.159506	0.151202	0.159506
C06B3.3	WBGene00007362	cyp-35C1	0.00186064	0.0673278	1.12512	0.361588	6.57791	0.43535	0.00154261	0.0725625	0.155352	0.155352
Y39A3CL.5a	WBGene00000545	clp-4	0.00217026	0.0770696	1.09445	0.356978	6.93775	0.427098	0.00129827	0.0890355	0.151621	0.151621
W01A11.4	WBGene00002273	lec-10	0.00264273	0.0895209	-1.07388	0.357187	7.63388	0.404299	0.000580945	0.0771931	0.152519	0.152519
T25F10.6a.2	WBGene00020808	clik-1	0.00293371	0.0976318	-1.09542	0.368259	8.26912	0.421861	0.00335082	0.0791499	0.159387	0.159387
B0310.5	WBGene00015141	ugt-46	0.00298043	0.0981516	-1.09746	0.369546	6.16592	0.404951	0.0027575	0.055411	0.161119	0.161119
T25B6.2	WBGene00020788	nep-22	0.00222453	0.0782111	-1.13839	0.372205	6.06807	0.435761	0.00267739	0.0599693	0.163566	0.163566
C32H11.12	WBGene00007875	dod-24	0.00127837	0.0501625	-1.16583	0.361969	6.55931	0.44569	0.00167442	0.0489179	0.155552	0.155552
M03B6.2	WBGene00010834	mct-3	0.00171672	0.0635038	-1.18863	0.37911	5.9	0.513608	0.00284828	0.116829	0.169621	0.169621
F44F4.11	WBGene00006530	tba-4	0.00106534	0.0431543	-1.19308	0.364557	6.36912	0.488729	0.00177389	0.0804901	0.157709	0.157709
D1054.8	WBGene00008375	D1054.8	0.00235365	0.0815435	-1.20685	0.396788	5.53547	0.467881	0.0038822	0.0373636	0.185047	0.185047
F56F10.1.2	WBGene00018984	F56F10.1	0.0018053	0.0663199	-1.20973	0.38767	6.39013	0.533798	0.0229035	0.103445	0.157442	0.157442
K08E7.9	WBGene00003995	pgp-1	0.00253222	0.0861142	-1.21136	0.401185	5.48448	0.529487	0.00566418	0.113356	0.187475	0.187475
C05E11.5	WBGene00000136	amt-4	0.00161397	0.0605436	-1.22907	0.389765	5.68642	0.502435	0.00376669	0.0618992	0.178533	0.178533
Y54G11A.7	WBGene00013216	Y54G11A.7	0.00131082	0.0511531	-1.23992	0.385836	5.78016	0.479618	0.00395196	0.0205736	0.174692	0.174692
K02G10.7b	WBGene00000176	aqp-8	0.00147195	0.0564078	-1.23995	0.389903	5.68951	0.575783	0.00402346	0.148693	0.178406	0.178406
Y106G6H.2a.5	WBGene00003902	pab-1	0.00289235	0.0969099	-1.2442	0.417663	9.24138	0.621406	0.00509409	0.204236	0.18406	0.204236
Y38F1A.6.1	WBGene00012608	hphd-1	0.00143534	0.0552036	-1.25463	0.393615	6.41077	0.527691	0.0287289	0.0452222	0.157191	0.157191
W05E7.1	WBGene00001692	grd-3	0.00037449	0.0180526	-1.27708	0.35899	6.74599	0.571098	0.00129386	0.107794	0.153354	0.153354
Y47G6A.33	WBGene00045399	Y47G6A.33	0.000702216	0.0308497	-1.2834	0.378726	5.90958	0.558921	0.00292021	0.0834669	0.1692	0.1692
M02F4.7.1	WBGene00019738	clec-265	0.0013178	0.0513314	-1.28415	0.39979	5.51895	0.532301	0.00598093	0.0441333	0.185817	0.185817
F55G11.4	WBGene00010124	F55G11.4	0.000492173	0.0228968	-1.32241	0.379458	5.90389	0.626704	0.00333746	0.132765	0.169449	0.169449
Y45G5AM.1b	WBGene00003704	nhr-114	0.000985475	0.0403023	-1.3258	0.40241	5.59723	0.66329	0.0120316	0.16926	0.182289	0.182289
F41H10.8	WBGene00001244	elo-6	0.000220494	0.0115432	-1.32906	0.359759	7.92246	0.610696	0.000477813	0.107227	0.154834	0.154834
C14C6.5a	WBGene00015759	C14C6.5	0.000876454	0.0366888	-1.33278	0.400542	6.35662	0.677284	0.00165766	0.190863	0.157873	0.190863
C11E4.1	WBGene00007516	gpx-5	0.000202146	0.0107142	-1.33702	0.359771	6.70757	0.558091	0.00146424	0.0276053	0.153858	0.153858
B0365.6.3	WBGene00007153	clec-41	0.00221818	0.0781201	-1.34125	0.438411	6.22171	0.712672	0.0107724	0.219873	0.159994	0.219873
C24H10.5	WBGene00006861	cal-5	0.000355156	0.017277	-1.34742	0.377287	5.93903	0.565761	0.00284589	0.0252842	0.167969	0.167969
F41H10.7	WBGene00001243	elo-5	0.000717913	0.0313204	-1.35549	0.400718	7.55259	0.695722	0.00164497	0.191045	0.152098	0.191045
C23H5.8a	WBGene00016027	C23H5.8	0.000140114	0.00785633	-1.35954	0.357026	6.98507	0.598359	0.0015675	0.0569037	0.151393	0.151393
W09C5.6b.5	WBGene00004445	rpl-31	0.000566837	0.0259611	-1.36389	0.395675	7.01847	0.698963	0.0018309	0.186039	0.151272	0.186039
C35A11.4	WBGene00016431	C35A11.4	0.00304433	0.0999469	-1.37446	0.46384	4.84364	0.630265	0.00925232	0.0754422	0.248925	0.248925
ZK512.7	WBGene00013986	ZK512.7	0.000131814	0.00743003	-1.40865	0.368463	6.58126	0.717477	0.00162141	0.161296	0.155316	0.161296
F54D11.1	WBGene00018811	pmt-2	8.98282e-05	0.00537632	-1.41347	0.360897	8.01826	0.651754	0.000402512	0.0694449	0.155894	0.155894
F22H10.6	WBGene00017730	F22H10.6	0.000861827	0.0363623	-1.50215	0.450808	5.37293	0.859844	0.00508936	0.238784	0.193463	0.238784
W07B8.1a	WBGene00021070	cpr-8	0.00190109	0.0685388	-1.51426	0.487642	4.76161	0.788234	0.0213809	0.112407	0.263973	0.263973
Y40D12A.2.1	WBGene00021503	ctsa-2	5.37535e-05	0.00351327	-1.5604	0.386365	6.1154	0.860778	0.0168335	0.156927	0.1623	0.1623
C47A10.1	WBGene00004003	pgp-9	0.00202313	0.0722057	-1.56294	0.506327	5.75056	0.963561	0.00583929	0.301801	0.175905	0.301801
F59A1.10	WBGene00010296	dgat-2	0.000117051	0.00666845	-1.58843	0.412341	5.3014	0.811925	0.00607934	0.0672423	0.197951	0.197951
F58G6.7	WBGene00010277	F58G6.7	0.000109045	0.0062795	-1.58963	0.410806	5.31297	0.789094	0.00532971	0.0360316	0.197184	0.197184
T05A1.2	WBGene00000696	col-122	0.000309698	0.0154176	-1.59183	0.44131	10.2389	0.893906	4.00315e-05	0.178269	0.233665	0.233665
Y37H2A.14	WBGene00045416	Y37H2A.14	0.000622026	0.0281153	-1.60777	0.469858	4.81088	0.876849	0.0102234	0.124938	0.254696	0.254696
F23B2.11.2	WBGene00003958	pcp-3	0.000364139	0.0176334	-1.62793	0.456669	5.99321	0.871767	0.0843214	0.017968	0.165935	0.165935
M02F4.8.2	WBGene00000175	aqp-7	1.23637e-05	0.000951021	-1.6408	0.375376	6.5168	0.934482	0.00648209	0.162607	0.156005	0.162607
F42A10.3	WBGene00018340	anmt-2	9.28982e-05	0.00548305	-1.64202	0.420123	5.70528	0.967724	0.00449797	0.207306	0.177758	0.207306
C34F6.2	WBGene00000751	col-178	2.46068e-05	0.00176531	-1.67865	0.397937	9.39686	0.952515	0.000102011	0.142772	0.189923	0.189923
Y116F11B.3	WBGene00003959	pcp-4	2.9983e-05	0.00210841	-1.72196	0.412585	5.31726	1.01355	0.00736778	0.157967	0.196904	0.196904
C15H9.7	WBGene00015802	kynu-1	2.37481e-06	0.000215319	-1.72698	0.365995	6.28911	0.931487	0.0018986	0.0471	0.158844	0.158844
F09E10.3	WBGene00000988	dhs-25	2.29629e-06	0.000209987	-1.73538	0.367244	6.25054	0.964875	0.00236452	0.0795128	0.159477	0.159477
F01F1.6.2	WBGene00000115	alh-9	7.52849e-05	0.00467666	-1.76676	0.446271	7.03233	1.11567	0.0317443	0.207245	0.151231	0.207245
T15B7.4	WBGene00000715	col-142	4.48732e-06	0.000380921	-1.77338	0.386573	5.76345	1.01337	0.0039487	0.0892596	0.175378	0.175378
D1025.2	WBGene00008354	gcsh-1	8.26029e-05	0.00500006	-1.78616	0.453718	4.91765	1.11387	0.00997387	0.199043	0.237058	0.237058
K10B2.2a.1	WBGene00019605	ctsa-1	2.68421e-06	0.000238301	-1.81857	0.387457	5.83487	1.07879	0.00772731	0.107771	0.17242	0.17242
C55B7.4a	WBGene00016943	acdh-1	0.000868052	0.0365525	-1.83138	0.549944	7.53936	1.27838	0.000846083	0.362079	0.152039	0.362079
F54E2.1	WBGene00018823	F54E2.1	1.78813e-07	2.09339e-05	-1.86053	0.356416	7.42781	1.09148	0.000808772	0.0698685	0.15163	0.15163
F58G6.9b.2	WBGene00044107	F58G6.9	0.000565211	0.0259546	-1.87621	0.544178	4.50439	1.22356	0.0319429	0.19141	0.323412	0.323412
C52D10.3b	WBGene00016877	C52D10.3	1.36706e-05	0.00104777	-1.91069	0.439331	5.03108	1.19766	0.00956466	0.127023	0.22205	0.22205
Y41C4A.16	WBGene00000670	col-95	5.14431e-05	0.00339349	-1.92182	0.474644	8.74096	1.31078	0.000220152	0.270125	0.16898	0.270125
W03G11.1b	WBGene00000754	col-181	0.000851718	0.0360535	-1.9522	0.585293	9.49791	1.45163	0.000842005	0.410239	0.194064	0.410239
F56B3.1	WBGene00000677	col-103	2.85858e-05	0.00202351	-1.9525	0.466608	8.17958	1.33962	0.000446538	0.260821	0.158018	0.260821
F11G11.11	WBGene00000609	col-20	7.26197e-05	0.00453756	-1.99218	0.50212	9.4421	1.41755	0.000102408	0.302447	0.191744	0.302447
T19H12.9	WBGene00020592	ugt-12	5.97444e-07	6.14963e-05	-2.00022	0.400682	5.48466	1.27894	0.00518903	0.0997099	0.187466	0.187466
C53B4.5	WBGene00000693	col-119	0.000164326	0.00902394	-2.00408	0.531819	9.89237	1.45945	8.57859e-05	0.339312	0.212968	0.339312
ZK6.11a.1	WBGene00022645	ZK6.11	0.00107333	0.0433957	-2.01611	0.616443	7.85521	1.56142	0.000852404	0.455149	0.154178	0.455149
C44C1.5a.2	WBGene00016644	abhd-3.2	0.000107065	0.00621453	-2.02203	0.52195	5.38273	1.47177	0.0113293	0.315589	0.192892	0.315589
F26F12.1	WBGene00000713	col-140	4.7224e-07	5.08183e-05	-2.04201	0.405381	9.56832	1.37044	8.9763e-05	0.159247	0.197111	0.197111
F57B1.4.1	WBGene00000733	col-160	0.000511204	0.0235762	-2.06678	0.594789	7.51947	1.59987	0.00394635	0.420582	0.151955	0.420582
T15B7.3	WBGene00000716	col-143	3.17744e-06	0.000276334	-2.08391	0.447287	8.98337	1.48287	0.000196057	0.239883	0.175601	0.239883
C35A5.3	WBGene00007947	C35A5.3	0.000135936	0.0076422	-2.15194	0.564007	4.37082	1.4163	0.0209717	0.0150883	0.360752	0.360752
C29E4.7	WBGene00016204	gsto-1	0.000570226	0.0259611	-2.19331	0.636593	4.53819	1.80791	0.0161482	0.470153	0.314606	0.470153
C49F5.1.2	WBGene00008205	sams-1	5.92666e-10	1.20266e-07	-2.20596	0.356239	7.29263	1.49023	0.00104304	0.039419	0.151244	0.151244
ZK6.10a	WBGene00022644	dod-19	0.00293966	0.0976318	-2.22073	0.74672	7.21346	1.98132	0.00493894	0.66417	0.15111	0.66417
F11H8.3	WBGene00000597	col-8	1.21182e-08	1.84431e-06	-2.22745	0.390913	9.2187	1.5998	0.000121289	0.148341	0.183255	0.183255
T10H9.5a	WBGene00004062	pmp-5	1.08605e-08	1.66478e-06	-2.24784	0.393205	5.64977	1.54193	0.00547822	0.0293133	0.180054	0.180054
T05E12.6a	WBGene00011487	T05E12.6	2.62349e-06	0.000233885	-2.44965	0.521391	6.03652	2.04489	0.00440438	0.321814	0.164506	0.321814
D1086.3	WBGene00008390	D1086.3	2.07109e-08	3.00195e-06	-2.48477	0.443238	6.45626	2.02904	0.00281716	0.232935	0.156665	0.232935
Y73B6BL.24	WBGene00022245	acp-6	1.73961e-06	0.000162569	-2.50611	0.524123	8.11094	2.13142	0.000669116	0.328977	0.157061	0.328977
W05B2.1	WBGene00000669	col-94	6.83569e-05	0.0042964	-2.54167	0.638301	6.58144	2.30471	0.00262362	0.48629	0.155314	0.48629
F11E6.3.2	WBGene00008707	F11E6.3	0.00063171	0.0283963	-2.59011	0.757871	6.99415	2.52954	0.0211197	0.668122	0.151357	0.668122
F37B4.7	WBGene00018138	folt-2	3.47267e-05	0.00241017	-2.60071	0.628187	7.33794	2.38427	0.00178385	0.471759	0.151357	0.471759
ZK1193.1	WBGene00000608	col-19	2.47459e-12	6.75976e-10	-2.62537	0.3748	8.40671	2.19421	0.00046494	0.168105	0.161762	0.168105
W10G11.3	WBGene00021136	W10G11.3	0.000294062	0.0147777	-2.71509	0.749925	4.25433	2.71765	0.0370162	0.637849	0.396064	0.637849
R193.2	WBGene00020128	R193.2	5.12015e-09	8.26477e-07	-2.7627	0.472805	6.17375	2.49095	0.00476519	0.263488	0.160951	0.263488
F22E5.1	WBGene00017703	F22E5.1	5.52082e-05	0.00356461	-2.78936	0.691736	4.19578	2.76481	0.0490881	0.525111	0.414495	0.525111
C15C8.3a	WBGene00007605	hrg-7	2.31351e-09	4.10783e-07	-2.84689	0.476538	7.581	2.63582	0.00189141	0.270615	0.152234	0.270615
B0024.2	WBGene00000723	col-150	0.000240096	0.012447	-2.87267	0.782191	3.60327	2.8958	0.0754191	0.484746	0.658768	0.658768
C32H11.10	WBGene00007873	dod-21	1.56206e-13	5.04286e-11	-2.91863	0.395384	5.71641	2.57506	0.0102923	0.0157631	0.177302	0.177302
T19C9.8	WBGene00011844	T19C9.8	1.44013e-06	0.000139476	-3.36651	0.698537	3.83856	3.46981	0.0414277	0.0516376	0.544117	0.544117
C15A11.5	WBGene00000596	col-7	0.00113912	0.0454519	-3.41611	1.04992	2.80768	3.8871	0.222034	0.292831	1.10076	1.10076
D2023.7	WBGene00000731	col-158	2.8992e-06	0.000255261	-3.44341	0.736112	3.8766	3.92721	0.122537	0.370914	0.527696	0.527696
C04F5.7	WBGene00015449	ugt-63	4.87697e-07	5.19568e-05	-3.44716	0.685171	3.93625	3.97386	0.0600589	0.485267	0.503292	0.503292
F46F2.3	WBGene00009787	F46F2.3	1.72299e-06	0.000161726	-3.45305	0.721872	6.27806	4.04605	0.00678808	0.61853	0.159019	0.61853
K08D12.6	WBGene00019540	K08D12.6	0.00108263	0.0436886	-3.7158	1.13698	6.36536	5.30559	0.00935165	1.54192	0.157757	1.54192
B0024.1	WBGene00000722	col-149	0.000952339	0.0393246	-3.74498	1.13338	2.29489	5.19862	0.119697	1.20186	1.42178	1.42178
T13F3.6.1	WBGene00011753	T13F3.6	3.18427e-21	3.08396e-18	-4.00784	0.423819	5.31863	4.96137	0.0187323	0.171309	0.196815	0.196815
C09G5.5	WBGene00000656	col-80	3.96065e-07	4.34998e-05	-4.03009	0.794759	7.65669	5.44097	0.00214373	0.755826	0.152655	0.755826
C34F6.3	WBGene00000752	col-179	1.47476e-05	0.00112224	-4.1153	0.949883	6.48658	5.89275	0.00849031	1.07424	0.15633	1.07424
F57B1.3	WBGene00000732	col-159	1.34834e-14	5.22347e-12	-4.18671	0.543646	4.63782	5.52455	0.0256388	0.329022	0.290346	0.329022
F41F3.4	WBGene00000712	col-139	2.15322e-10	4.58788e-08	-4.24074	0.667833	4.40484	5.79656	0.055917	0.479285	0.350884	0.479285
ZC513.8	WBGene00000620	col-43	7.35837e-07	7.46594e-05	-4.45843	0.900391	3.43294	6.27699	0.220954	0.197329	0.751891	0.751891
T13F3.6.2	WBGene00011753	T13F3.6	0.000318209	0.0158044	-4.66562	1.296	1.96952	7.55394	0.391383	0.973324	1.62417	1.62417
C15A11.6	WBGene00000638	col-62	2.66973e-05	0.00189613	-4.91903	1.17121	2.06297	8.49362	0.0640359	1.58205	1.56649	1.58205
F23B2.11.1	WBGene00003958	pcp-3	4.85483e-06	0.000405654	-4.96778	1.08681	3.27972	7.59049	0.579668	-0.330533	0.837722	0.837722
C01F6.6a	WBGene00006438	nrfl-1	0.00234928	0.0815246	-4.98144	1.6375	2.50478	9.85767	1.28486	1.93281	1.2889	1.93281
F38A3.1	WBGene00000657	col-81	0.000830248	0.0352392	-4.98347	1.49094	3.54765	9.45111	0.0240314	2.64345	0.688536	2.64345
C32H11.9	WBGene00007872	C32H11.9	0.00184497	0.0671979	-5.01106	1.60914	3.79299	9.86361	0.134497	2.97271	0.564631	2.97271
T19A5.2g	WBGene00001526	gck-1	0.00135387	0.0525019	-5.07545	1.58394	2.58775	9.7126	1.7742	0.871873	1.23646	1.23646
C24F3.6.1	WBGene00000698	col-124	1.19292e-18	7.94297e-16	-5.12011	0.580816	7.06207	8.16826	0.00441519	0.400401	0.15116	0.400401
M18.1a	WBGene00000703	col-129	0.00251206	0.0859142	-5.21099	1.72442	4.03556	10.8226	0.07641	3.49193	0.466491	3.49193
F45C12.15.3	WBGene00018446	ceh-83	0.00246718	0.0845147	-5.25177	1.73478	2.68728	10.9828	2.41936	1.19199	1.17427	1.19199
W05B2.5	WBGene00000668	col-93	2.79048e-14	1.02524e-11	-5.69289	0.748308	6.8206	10.2267	0.00968156	0.662276	0.152511	0.662276
T28D6.3	WBGene00012123	T28D6.3	2.84589e-11	6.59101e-09	-5.85371	0.879684	3.40532	10.8023	0.161228	0.5355	0.767384	0.767384
F52A8.6c.2	WBGene00009919	kbrl-1	0.00165748	0.0618445	-5.87422	1.86744	3.03634	13.4906	1.67153	2.51328	0.968647	2.51328
