# Supplementary material for: Infection of C. elegans by Haptoglossa Species Reveals Shared Features in the Host Response to Oomycete Detection
Source: Front Cell Infect Microbiol. 2021 Oct 14;11:733094. doi: 10.3389/fcimb.2021.733094 (PMC8552708; doi:10.3389/fcimb.2021.733094)
Supplement: Supplementary Table 3 — GSEA analysis of genes upregulated upon H. zoospora exposure. Gene sets showing significant intersection with up-regulated genes at 6 h (Sheet 1) and 12 h (Sheet 2) post MBAo1 exposure (NOM p-value<0.05, FDR q-value<0.25 are considered significant). Sheet 3 gives the list of gene sets used in GSEA analysis. Gene sets with overlap > 25 genes were included in the analysis. [file DataSheet_3.xlsx]

## Sheet: 6 hours
Summary of GSEA results (NOM p-value<0.05, FDR q-value<0.25 are considered significant and are highlighted in orange). Genesets with overlap > 15 genes were included in the analysis.
NAME	SIZE	ES	NES	NOM p-val	FDR q-val	FWER p-val	RANK AT MAX	LEADING EDGE
SARKIES ET AL 2013 (TABLE_S1)_ORSAY_N2_UP	16	0.839646	1.99122	0	0	0	214	tags=100%, list=17%, signal=119%
OSMAN ET AL 2018 (DATA_S2)_JU2519 12H	30	0.764179	1.95622	0	0	0	141	tags=67%, list=11%, signal=73%
BAKOWSKI ET AL 2014 (TABLE_S2)_16H_UP	41	0.751705	1.9528	0	0	0	263	tags=85%, list=21%, signal=104%
BAKOWSKI ET AL 2014 (TABLE_S2)_40H_UP	22	0.790537	1.94333	0	0	0	225	tags=86%, list=18%, signal=103%
OSMAN ET AL 2018 (DATA_S2)_JU2519 24H	77	0.708084	1.91992	0	0	0	279	tags=73%, list=22%, signal=88%
BAKOWSKI ET AL 2014 (TABLE_S2)_30H_UP	42	0.737847	1.91882	0	0	0	292	tags=86%, list=23%, signal=108%
REDDY ET AL 2019 IPR	42	0.736059	1.9149	0	0	0	292	tags=86%, list=23%, signal=108%
BAKOWSKI ET AL 2014 (TABLE_S2)_8H_UP	61	0.708601	1.89989	0	0	0	292	tags=79%, list=23%, signal=98%
OSMAN ET AL 2018 (DATA_S2)_N2 24H	49	0.709311	1.86618	0	0	0	199	tags=63%, list=16%, signal=72%
ENGELMANN ET AL 2011 (TABLE_S9)_CON_UP	88	0.646286	1.75577	0	0.000196364	0.002	429	tags=88%, list=34%, signal=124%
REDDY ET AL 2019 (TABLE_S4)_PALS-22 UP	256	0.577082	1.63066	0	0.00205785	0.023	376	tags=54%, list=30%, signal=61%
TROEMEL ET AL 2006 (TABLE_S5)_UP_8H	44	0.607084	1.58509	0	0.00344551	0.042	376	tags=73%, list=30%, signal=100%
YANG ET AL 2016, WORMEXP_12H_1:10_BT247_UP	222	0.538068	1.50243	0	0.0135666	0.163	386	tags=52%, list=31%, signal=62%
YANG ET AL 2016, WORMEXP_6H_1:2_BT247_UP	192	0.535658	1.49528	0	0.0137236	0.177	342	tags=47%, list=27%, signal=55%
ENGELMANN ET AL 2011 (TABLE_S9)_HARP_UP	47	0.567676	1.49215	0.003	0.0132681	0.184	376	tags=64%, list=30%, signal=88%
REDDY ET AL 2019 (TABLE_S4)_BTZ UP	216	0.524382	1.47593	0	0.016249	0.234	438	tags=54%, list=35%, signal=68%
BAKOWSKI ET AL 2014 (TABLE_S2)_64H_UP	25	0.588425	1.47555	0.0080402	0.0154087	0.236	353	tags=64%, list=28%, signal=87%
YANG ET AL 2016, WORMEXP_12H_1:2_BT247_UP	204	0.526207	1.47228	0	0.0155931	0.253	376	tags=50%, list=30%, signal=60%
ENGELMANN ET AL 2011 (TABLE_S18)_CON_UP	23	0.576962	1.4491	0.0231388	0.0195475	0.32	479	tags=87%, list=38%, signal=138%
YANG ET AL 2016, WORMEXP_6H_1:10_BT247_UP	216	0.515258	1.4488	0	0.0186192	0.321	441	tags=55%, list=35%, signal=70%
OSMAN ET AL 2018 (DATA_S2)_N2 12H	28	0.56739	1.42546	0.0171026	0.0259433	0.431	239	tags=43%, list=19%, signal=52%
TROEMEL ET AL 2006 (TABLE_S4)_P.AE_8H_UP	60	0.532548	1.41592	0.006	0.0283021	0.474	376	tags=58%, list=30%, signal=79%
TROEMEL ET AL 2006 (TABLE_S5)_PA14_UP_4H	65	0.522074	1.40029	0.002	0.0332328	0.539	432	tags=60%, list=34%, signal=87%
ENGELMANN ET AL 2011 (TABLE_S9)_P.LUMINESCENS_UP	267	0.484811	1.36747	0	0.046712	0.682	449	tags=51%, list=36%, signal=63%
ENGELMANN ET AL 2011 (TABLE_S2)_S. MARCESCENS_DOWN	125	0.497825	1.36742	0.002	0.0448436	0.682	429	tags=56%, list=34%, signal=77%
ENGELMANN ET AL 2011 (TABLE_S9)_E. FAECALIS_UP	179	0.462147	1.2865	0.003	0.106816	0.949	455	tags=52%, list=36%, signal=70%
ENGELMANN ET AL 2011 (TABLE_S9)_E. FAECALIS_DOWN	81	0.462481	1.26267	0.028	0.129021	0.978	358	tags=44%, list=28%, signal=58%
NAKAD ET AL 2016 (FILE S15)_UP BY PA14 24HOURS	120	0.435666	1.20578	0.047	0.207533	0.998	449	tags=52%, list=36%, signal=74%
TJAHJONO ET AL 2017 (TABLE_S1)_UP SLOW KILLING BY PA14	43	0.480934	1.2593	0.0810811	0.128921	0.978	427	tags=58%, list=34%, signal=85%
TJAHJONO ET AL 2017 (TABLE_S1)_UP LIQUID KILLING BY PA14	58	0.455567	1.20492	0.112	0.201962	0.999	430	tags=50%, list=34%, signal=72%
TROEMEL ET AL 2006 (TABLE_S4)_P.AE_4H_UP	88	0.427267	1.15875	0.116	0.294863	1	432	tags=48%, list=34%, signal=68%
BOND ET AL 2014 (DATASET_S1)_UP BY S. AUREUS	150	0.404998	1.12222	0.144	0.385373	1	579	tags=63%, list=46%, signal=103%
PUKKILA-WORLEY ET AL 2011 (TABLE_S1)_UP BY C. ALBICANS	46	0.414638	1.08453	0.347347	0.494166	1	427	tags=50%, list=34%, signal=73%
ENGELMANN ET AL 2011 (TABLE_S9)_P.LUMINESCENS_DOWN	88	0.385751	1.04612	0.387	0.622182	1	556	tags=59%, list=44%, signal=99%
BOND ET AL 2014 (DATASET_S1)_DOWN BY S. AUREUS	27	0.411086	1.04397	0.435176	0.613339	1	686	tags=85%, list=55%, signal=183%
TROEMEL ET AL 2006 (TABLE_S2)_PMK_UP	26	0.410968	1.03379	0.452811	0.633345	1	526	tags=65%, list=42%, signal=110%
IRAZOQUI ET AL 2010 (TABLE_S1)_S.AU_UP	73	0.372948	0.995081	0.524	0.762854	1	620	tags=67%, list=49%, signal=125%
PUKKILA-WORLEY ET AL 2011 (TABLE_S1)_UP BY HEAT-KILLED C. ALBICANS	43	0.378065	0.994931	0.512513	0.743194	1	335	tags=37%, list=27%, signal=49%
HEAD ET AL 2017 (TABLE_S5)_UP BY PA14 UP BY PA14(HEAD)	20	0.394806	0.96042	0.561866	0.842688	1	450	tags=50%, list=36%, signal=77%
TROEMEL ET AL 2006 (TABLE_S4)_P.AE_8H_DOWN	24	0.371901	0.922342	0.637007	0.93721	1	309	tags=29%, list=25%, signal=38%
PUKKILA-WORLEY ET AL 2011 (TABLE_S1)_DOWN BY C. ALBICANS	38	0.350983	0.913026	0.674675	0.940583	1	390	tags=39%, list=31%, signal=55%
BAKOWSKI ET AL 2014 (TABLE_S2)_64H_DOWN	66	0.335252	0.902118	0.742	0.945028	1	546	tags=50%, list=43%, signal=84%
REDDY ET AL 2019 (TABLE_S4)_PALS-22;PALS-25 UP	119	0.323837	0.890595	0.82	0.949477	1	575	tags=51%, list=46%, signal=86%
NAKAD ET AL 2016 (FILE S15)_UP BY PA14 12HOURS	68	0.330929	0.878122	0.783	0.954855	1	676	tags=68%, list=54%, signal=138%
MURPHY ET AL 2003 (TABLE_S1)_DAF-16_UP	66	0.325063	0.86685	0.811	0.95592	1	510	tags=42%, list=41%, signal=68%
TROEMEL ET AL 2006 (TABLE_S3)_SEK_UP	20	0.340844	0.834111	0.75428	0.989202	1	548	tags=55%, list=44%, signal=96%
BAKOWSKI ET AL 2014 (TABLE_S2)_40H_DOWN	52	0.289746	0.76979	0.886	1	1	660	tags=62%, list=53%, signal=124%
STEINBAUGH ET AL 2015, SKN-1_UP (GERMLINE FREE) SKN-1_UP (GERMLINE FREE)	21	0.308355	0.75865	0.830132	1	1	338	tags=29%, list=27%, signal=38%
OLIVEIRA ET AL 2009, SKN-1_UP(OLIVEIRA) SKN-1_UP(OLIVEIRA)	15	0.297626	0.713211	0.860825	1	1	680	tags=60%, list=54%, signal=129%
VISVIKIS ET AL 2014 (TABLE_S2)_UP BY S. AUREUS	238	0.239229	0.671813	1	1	1	646	tags=49%, list=51%, signal=82%
ENGELMANN ET AL 2011 (TABLE_S2)_S. MARCESCENS_UP	182	0.240255	0.667547	0.999	1	1	532	tags=38%, list=42%, signal=56%
STEINBAUGH ET AL 2015, SKN-1_UP(STEINBAUGH)	18	0.270644	0.654898	0.909184	1	1	777	tags=72%, list=62%, signal=186%
TROEMEL ET AL 2006 (TABLE_S5)_DOWN	28	0.238203	0.601348	0.961886	0.997914	1	728	tags=61%, list=58%, signal=141%
NAKAD ET AL 2016 (FILE S15)_DOWN BY PA14 24HOURS	61	0.160149	0.426788	1	0.998141	1	752	tags=52%, list=60%, signal=124%

## Sheet: 12 hours
Summary of GSEA results (NOM p-value<0.05, FDR q-value<0.25 are considered significant and are highlighted in orange). Genesets with overlap > 15 genes were included in the analysis.
NAME	SIZE	ES	NES	NOM p-val	FDR q-val	FWER p-val	RANK AT MAX	LEADING EDGE
REDDY ET AL 2019 IPR	38	0.545315	2.08848	0	0.00172727	0.002	240	tags=95%, list=47%, signal=165%
BAKOWSKI ET AL 2014 (TABLE_S2)_16H_UP	40	0.532097	2.03482	0	0.000863636	0.002	240	tags=93%, list=47%, signal=160%
BAKOWSKI ET AL 2014 (TABLE_S2)_30H_UP	39	0.530058	2.02765	0	0.000575758	0.002	240	tags=92%, list=47%, signal=160%
OSMAN ET AL 2018 (DATA_S2)_JU2519 24H	61	0.491592	1.99082	0	0.000868657	0.004	250	tags=85%, list=49%, signal=146%
BAKOWSKI ET AL 2014 (TABLE_S2)_8H_UP	53	0.488083	1.94219	0	0.00120927	0.007	240	tags=85%, list=47%, signal=143%
OSMAN ET AL 2018 (DATA_S2)_JU2519 12H	26	0.536529	1.92495	0	0.00100772	0.007	180	tags=77%, list=35%, signal=112%
BAKOWSKI ET AL 2014 (TABLE_S2)_40H_UP	20	0.537412	1.80921	0.00104493	0.00503453	0.041	178	tags=80%, list=35%, signal=118%
SARKIES ET AL 2013 (TABLE_S1)_ORSAY_N2_UP	16	0.548193	1.76639	0.0021645	0.00665798	0.061	240	tags=100%, list=47%, signal=182%
OSMAN ET AL 2018 (DATA_S2)_N2 24H	40	0.438722	1.68724	0.00603622	0.0169385	0.16	176	tags=63%, list=34%, signal=88%
BAKOWSKI ET AL 2014 (TABLE_S2)_64H_UP	16	0.49771	1.59898	0.0152505	0.0369335	0.342	137	tags=63%, list=27%, signal=83%
ENGELMANN ET AL 2011 (TABLE_S9)_CON_UP	62	0.37792	1.54052	0.00600601	0.054566	0.487	288	tags=82%, list=56%, signal=165%
REDDY ET AL 2019 (TABLE_S4)_PALS-22 UP	162	0.329426	1.42612	0.01	0.132591	0.85	271	tags=64%, list=53%, signal=93%
ENGELMANN ET AL 2011 (TABLE_S2)_S. MARCESCENS_DOWN	63	0.34727	1.39533	0.035	0.155974	0.921	252	tags=67%, list=49%, signal=115%
REDDY ET AL 2019 (TABLE_S4)_BTZ UP	134	0.314587	1.34994	0.024	0.204687	0.972	251	tags=58%, list=49%, signal=84%
ENGELMANN ET AL 2011 (TABLE_S18)_CON_UP	16	0.410793	1.31775	0.13412	0.238056	0.984	168	tags=56%, list=33%, signal=81%
YANG ET AL 2016, WORMEXP_12H_1:10_BT247_UP	155	0.295228	1.28325	0.051	0.280336	0.992	127	tags=33%, list=25%, signal=31%
ENGELMANN ET AL 2011 (TABLE_S9)_E. FAECALIS_DOWN	33	0.322773	1.19502	0.236493	0.452694	0.999	286	tags=76%, list=56%, signal=160%
OSMAN ET AL 2018 (DATA_S2)_N2 12H	15	0.358625	1.13943	0.290288	0.573201	1	287	tags=80%, list=56%, signal=176%
YANG ET AL 2016, WORMEXP_12H_1:2_BT247_UP	138	0.261479	1.13435	0.219	0.557047	1	127	tags=31%, list=25%, signal=30%
ENGELMANN ET AL 2011 (TABLE_S9)_HARP_UP	26	0.322408	1.12569	0.305015	0.552014	1	125	tags=38%, list=24%, signal=48%
TROEMEL ET AL 2006 (TABLE_S5)_UP_8H	41	0.288639	1.12076	0.317861	0.540705	1	314	tags=78%, list=61%, signal=185%
TJAHJONO ET AL 2017 (TABLE_S1)_UP LIQUID KILLING BY PA14	32	0.300859	1.11092	0.323171	0.542855	1	134	tags=38%, list=26%, signal=48%
ENGELMANN ET AL 2011 (TABLE_S9)_E. FAECALIS_UP	68	0.265089	1.0765	0.352352	0.60639	1	302	tags=71%, list=59%, signal=149%
YANG ET AL 2016, WORMEXP_6H_1:2_BT247_UP	145	0.243152	1.04372	0.414	0.664323	1	313	tags=67%, list=61%, signal=123%
ENGELMANN ET AL 2011 (TABLE_S9)_P.LUMINESCENS_UP	141	0.225413	0.981754	0.54	0.796127	1	125	tags=28%, list=24%, signal=27%
TROEMEL ET AL 2006 (TABLE_S4)_P.AE_8H_UP	50	0.241441	0.958835	0.561685	0.821305	1	316	tags=72%, list=61%, signal=169%
TROEMEL ET AL 2006 (TABLE_S5)_PA14_UP_4H	45	0.232645	0.905701	0.646169	0.912171	1	316	tags=71%, list=61%, signal=168%
YANG ET AL 2016, WORMEXP_6H_1:10_BT247_UP	157	0.208199	0.90188	0.711	0.888044	1	313	tags=64%, list=61%, signal=113%
ENGELMANN ET AL 2011 (TABLE_S9)_P.LUMINESCENS_DOWN	31	0.240268	0.884465	0.639144	0.891098	1	355	tags=84%, list=69%, signal=255%
TJAHJONO ET AL 2017 (TABLE_S1)_UP SLOW KILLING BY PA14	31	0.234922	0.860331	0.705584	0.907429	1	346	tags=81%, list=67%, signal=232%
HEAD ET AL 2017 (TABLE_S5)_UP BY PA14 UP	16	0.263461	0.846412	0.684211	0.901044	1	328	tags=81%, list=64%, signal=218%
BOND ET AL 2014 (DATASET_S1)_UP BY S. AUREUS	78	0.202026	0.840966	0.779	0.882101	1	273	tags=54%, list=53%, signal=97%
TROEMEL ET AL 2006 (TABLE_S4)_P.AE_4H_UP	57	0.194995	0.785682	0.836673	0.935815	1	316	tags=65%, list=61%, signal=150%
NAKAD ET AL 2016 (FILE S15)_UP BY PA14 24HOURS	74	0.192764	0.776117	0.867	0.920009	1	313	tags=64%, list=61%, signal=139%
NAKAD ET AL 2016 (FILE S15)_UP BY PA14 12HOURS	35	0.168323	0.627661	0.938071	1	1	328	tags=66%, list=64%, signal=169%
REDDY ET AL 2019 (TABLE_S4)_PALS-22;PALS-25 UP	37	0.16428	0.622263	0.93441	0.997789	1	153	tags=27%, list=30%, signal=36%
TROEMEL ET AL 2006 (TABLE_S2)_PMK_UP	16	0.177428	0.569311	0.949408	0.993986	1	338	tags=69%, list=66%, signal=195%
ENGELMANN ET AL 2011 (TABLE_S2)_S. MARCESCENS_UP	61	0.123578	0.496307	0.993982	0.986311	1	276	tags=48%, list=54%, signal=90%

## Sheet: Gene sets
Irazoqui et al 2010 (Table_S1)_S.au_UP	UP 8h on S. aureus	WBGene00001477	WBGene00022040	WBGene00016670	WBGene00021582	WBGene00013900	WBGene00019779	WBGene00008167	WBGene00019644	WBGene00010790	WBGene00010062	WBGene00011321	WBGene00014046	WBGene00006418	WBGene00016017	WBGene00016669	WBGene00009778	WBGene00009226	WBGene00011596	WBGene00001391	WBGene00002012	WBGene00013980	WBGene00020700	WBGene00015044	WBGene00008621	WBGene00020386	WBGene00015052	WBGene00001158	WBGene00008392	WBGene00007919	WBGene00000782	WBGene00000176	WBGene00013101	WBGene00003094	WBGene00007957	WBGene00018731	WBGene00021583	WBGene00021167	WBGene00007811	WBGene00018384	WBGene00020326	WBGene00001523	WBGene00018267	WBGene00021581	WBGene00009773	WBGene00003093	WBGene00016845	WBGene00016119	WBGene00012947
Irazoqui et al 2010 (Table_S1)_S.au_down	DOWN 8h on S. aureus	WBGene00011870	WBGene00000217	WBGene00017063	WBGene00012280	WBGene00008354	WBGene00001713	WBGene00000707	WBGene00000755	WBGene00011779	WBGene00000115	WBGene00019977	WBGene00001000	WBGene00012457	WBGene00008333	WBGene00019772	WBGene00014206	WBGene00003860	WBGene00000668	WBGene00011000	WBGene00022683	WBGene00018946	WBGene00003474	WBGene00000669	WBGene00007142	WBGene00004173	WBGene00009383	WBGene00012777	WBGene00000656	WBGene00021222	WBGene00016431	WBGene00003091	WBGene00003658	WBGene00013083	WBGene00008101	WBGene00021136	WBGene00020304	WBGene00007947	WBGene00001243	WBGene00000118	WBGene00004932	WBGene00012615	WBGene00008944	WBGene00001604	WBGene00018885	WBGene00010273	WBGene00010904	WBGene00015695	WBGene00010504
Troemel et al 2006 (Table_S4)_P.ae_4h_up	UP 4h on P. aeruginosa PA14	WBGene00000298	WBGene00000373	WBGene00000412	WBGene00000512	WBGene00000522	WBGene00000556	WBGene00000558	WBGene00000783	WBGene00000841	WBGene00000861	WBGene00000973	WBGene00000981	WBGene00000991	WBGene00001157	WBGene00001158	WBGene00001391	WBGene00001523	WBGene00001591	WBGene00001753	WBGene00001754	WBGene00001761	WBGene00001770	WBGene00001786	WBGene00001817	WBGene00001884	WBGene00002058	WBGene00002094	WBGene00002274	WBGene00003092	WBGene00003402	WBGene00003561	WBGene00003605	WBGene00003618	WBGene00003653	WBGene00003702	WBGene00003766	WBGene00003999	WBGene00004000	WBGene00004052	WBGene00004196	WBGene00004210	WBGene00005657	WBGene00005868	WBGene00006418	WBGene00006467	WBGene00006627	WBGene00006628	WBGene00006649
Troemel et al 2006 (Table_S4)_P.ae_4h_down	DOWN 4h on P. aeruginosa PA14	WBGene00009057	WBGene00007808	WBGene00015141	WBGene00007605	WBGene00021337	WBGene00021743	WBGene00018488	WBGene00021105	WBGene00021645	WBGene00007981	WBGene00016957	WBGene00011407	WBGene00000169	WBGene00003764	WBGene00008905	WBGene00044697	WBGene00008068	WBGene00001774	WBGene00016598	WBGene00018488	WBGene00019730	WBGene00009830	WBGene00008375	WBGene00007331	WBGene00002348	WBGene00010189	WBGene00016083	WBGene00018138	WBGene00016631	WBGene00020921	WBGene00009677	WBGene00009628	WBGene00004020	WBGene00003986	WBGene00007375	WBGene00009626	WBGene00007954	WBGene00020315	WBGene00019208	WBGene00015403	WBGene00006351	WBGene00016957	WBGene00020741	WBGene00018393	WBGene00020739	WBGene00018174	WBGene00017880	WBGene00013904
Troemel et al 2006 (Table_S4)_P.ae_8h_up	UP 8h on P. aeruginosa PA14	WBGene00015574	WBGene00021979	WBGene00020760	WBGene00013090	WBGene00018760	WBGene00009914	WBGene00013901	WBGene00021262	WBGene00003999	WBGene00012583	WBGene00007811	WBGene00007366	WBGene00010123	WBGene00007864	WBGene00019644	WBGene00015932	WBGene00016783	WBGene00020579	WBGene00011494	WBGene00011799	WBGene00016785	WBGene00018646	WBGene00009428	WBGene00010019	WBGene00018708	WBGene00001786	WBGene00021585	WBGene00019146	WBGene00019779	WBGene00007506	WBGene00018707	WBGene00012923	WBGene00008584	WBGene00019779	WBGene00021464	WBGene00008577	WBGene00015455	WBGene00019644	WBGene00019967	WBGene00016577	WBGene00019564	WBGene00018729	WBGene00022375	WBGene00019659	WBGene00018724	WBGene00010125	WBGene00003092	WBGene00018725
Troemel et al 2006 (Table_S4)_P.ae_8h_down	DOWN 8h on P. aeruginosa PA14	WBGene00017126	WBGene00008707	WBGene00015172	WBGene00012722	WBGene00000169	WBGene00001620	WBGene00016003	WBGene00010145	WBGene00020007	WBGene00008499	WBGene00011407	WBGene00012293	WBGene00003474	WBGene00000601	WBGene00015141	WBGene00008607	WBGene00001163	WBGene00009658	WBGene00018146	WBGene00020516	WBGene00008375	WBGene00016782	WBGene00008565	WBGene00004130	WBGene00016781	WBGene00000557	WBGene00015142	WBGene00010504	WBGene00009629	WBGene00009956	WBGene00018393	WBGene00003762	WBGene00021817	WBGene00015043	WBGene00011707	WBGene00006787	WBGene00016027	WBGene00012722	WBGene00000602	WBGene00005891	WBGene00012727	WBGene00008839	WBGene00003473	WBGene00020516	WBGene00012722	WBGene00012445	WBGene00020921	WBGene00015756
Troemel et al 2006 (Table_S2)_pmk_up	UPREG by PMK-1 (in daf-2(e1368))	WBGene00008584	WBGene00015660	WBGene00015933	WBGene00015660	WBGene00008495	WBGene00015933	WBGene00003091	WBGene00008492	WBGene00010128	WBGene00011979	WBGene00019090	WBGene00019388	WBGene00044642	WBGene00021872	WBGene00018971	WBGene00007875	WBGene00003767	WBGene00010124	WBGene00008493	WBGene00006418	WBGene00020156	WBGene00010659	WBGene00012778	WBGene00009429	WBGene00003736	WBGene00010659	WBGene00001387	WBGene00019311	WBGene00002088	WBGene00021518	WBGene00008494	WBGene00003528	WBGene00003769	WBGene00022644	WBGene00021290	WBGene00003530	WBGene00007954	WBGene00012535	WBGene00003099	WBGene00017041	WBGene00008960	WBGene00022644	WBGene00018268	WBGene00007460	WBGene00008113	WBGene00007460	WBGene00015362	WBGene00022645
Troemel et al 2006 (Table_S2)_pmk_down	DOWNREG by PMK-1 (in daf-2(e1368))	WBGene00015403	WBGene00005282	WBGene00007961	WBGene00012265	WBGene00016862	WBGene00005207	WBGene00016872	WBGene00017612	WBGene00020739	WBGene00007342	WBGene00013791	WBGene00017869	WBGene00005913	WBGene00009857	WBGene00012592	WBGene00010292	WBGene00019590	WBGene00017094	WBGene00013755	WBGene00005184	WBGene00020590	WBGene00010798	WBGene00168402	WBGene00005516	WBGene00021941	WBGene00020551	WBGene00009170	WBGene00021036	WBGene00003094	WBGene00001399	WBGene00010442	WBGene00009831	WBGene00014098	WBGene00001778	WBGene00014098	WBGene00012009	WBGene00015052	WBGene00012814	WBGene00014046	WBGene00021227	WBGene00021219	WBGene00044734	WBGene00021222	WBGene00021219	WBGene00006539
Troemel et al 2006 (Table_S3)_sek_up	UPREG by SEK-1 (in glp-4(bn2))	WBGene00009429	WBGene00007875	WBGene00018910	WBGene00015933	WBGene00010123	WBGene00003091	WBGene00008584	WBGene00010745	WBGene00011190	WBGene00010659	WBGene00019737	WBGene00007873	WBGene00010128	WBGene00011979	WBGene00007867	WBGene00011668	WBGene00015660	WBGene00010127	WBGene00017490	WBGene00018971	WBGene00007864	WBGene00010050	WBGene00009396	WBGene00007872	WBGene00007153	WBGene00018643	WBGene00008390	WBGene00018970	WBGene00001387	WBGene00017498	WBGene00022645	WBGene00011487	WBGene00009488	WBGene00011487	WBGene00009431	WBGene00021518	WBGene00015932	WBGene00008486	WBGene00002273	WBGene00022644	WBGene00008495	WBGene00011330	WBGene00014253	WBGene00010125	WBGene00021503	WBGene00007833	WBGene00014138	WBGene00009430
Troemel et al 2006 (Table_S5)_PA14_up_4h	UP 4h on PA14 vs gacA	WBGene00016845	WBGene00015574	WBGene00013090	WBGene00021979	WBGene00007864	WBGene00007366	WBGene00021585	WBGene00015932	WBGene00016783	WBGene00018707	WBGene00019564	WBGene00007506	WBGene00011494	WBGene00021262	WBGene00009914	WBGene00009428	WBGene00018725	WBGene00021977	WBGene00012583	WBGene00020578	WBGene00007228	WBGene00021464	WBGene00020760	WBGene00003999	WBGene00001754	WBGene00008477	WBGene00015455	WBGene00010790	WBGene00012923	WBGene00018646	WBGene00016785	WBGene00010019	WBGene00008602	WBGene00010126	WBGene00012661	WBGene00018707	WBGene00021796	WBGene00019146	WBGene00021876	WBGene00018708	WBGene00009724	WBGene00018729	WBGene00017726	WBGene00013898	WBGene00020579	WBGene00018760	WBGene00003653	WBGene00014063
Troemel et al 2006 (Table_S5)_PA14_down_4h	DOWN 4h on PA14 vs gacA	WBGene00004989	WBGene00015141	WBGene00001774	WBGene00018250	WBGene00004062	WBGene00013207	WBGene00000673	WBGene00011105	WBGene00013904	WBGene00016274	WBGene00007516	WBGene00000989	WBGene00010005	WBGene00007963	WBGene00019977	WBGene00002348	WBGene00001428	WBGene00009830	WBGene00004020	WBGene00008205	WBGene00003764	WBGene00011407	WBGene00011340	WBGene00015141	WBGene00011753	WBGene00006366	WBGene00008560	WBGene00012007	WBGene00011753	WBGene00017962	WBGene00021645	WBGene00001430	WBGene00017881	WBGene00012834	WBGene00020128	WBGene00006206	WBGene00008260	WBGene00009626	WBGene00001244	WBGene00008390	WBGene00008354	WBGene00008341	WBGene00001243	WBGene00016714	WBGene00021742	WBGene00019495	WBGene00001699	WBGene00021731
Troemel et al 2006 (Table_S5)_up_8h	UP 8h on PA14 vs gacA	WBGene00018708	WBGene00015574	WBGene00013090	WBGene00021979	WBGene00012583	WBGene00003999	WBGene00016845	WBGene00011799	WBGene00007366	WBGene00009428	WBGene00011494	WBGene00018343	WBGene00021464	WBGene00016783	WBGene00017673	WBGene00020760	WBGene00016785	WBGene00015695	WBGene00008577	WBGene00010790	WBGene00009914	WBGene00019146	WBGene00004000	WBGene00019659	WBGene00012923	WBGene00010019	WBGene00020579	WBGene00022375	WBGene00021585	WBGene00011330	WBGene00021709	WBGene00018725	WBGene00016845	WBGene00007506	WBGene00021262	WBGene00012451	WBGene00018760	WBGene00018729	WBGene00016845	WBGene00019660	WBGene00021978	WBGene00017093	WBGene00020578	WBGene00013901	WBGene00018724	WBGene00018707	WBGene00011801	WBGene00015932
Troemel et al 2006 (Table_S5)_down	DOWN 8h on PA14 vs gacA	WBGene00000669	WBGene00012445	WBGene00008802	WBGene00010135	WBGene00018206	WBGene00008953	WBGene00001713	WBGene00018174	WBGene00007536	WBGene00022591	WBGene00006928	WBGene00014030	WBGene00001428	WBGene00015449	WBGene00020527	WBGene00019731	WBGene00008596	WBGene00008707	WBGene00000628	WBGene00008186	WBGene00001784	WBGene00020315	WBGene00019097	WBGene00010189	WBGene00001604	WBGene00022499	WBGene00005506	WBGene00020674	WBGene00004932	WBGene00003983	WBGene00000602	WBGene00022245	WBGene00000601	WBGene00020078	WBGene00005256	WBGene00022642	WBGene00020022	WBGene00008333	WBGene00011000	WBGene00018811	WBGene00000683	WBGene00001633	WBGene00008963	WBGene00012428	WBGene00000557	WBGene00001478	WBGene00005292	WBGene00019655
Engelmann et al 2011 (Table_S9)_harp_up	UP 24h on Harposporium	WBGene00010289	WBGene00018822	WBGene00010003	WBGene00019160	WBGene00017466	WBGene00010422	WBGene00017361	WBGene00022578	WBGene00011456	WBGene00021709	WBGene00044457	WBGene00044482	WBGene00021718	WBGene00009398	WBGene00000656	WBGene00018562	WBGene00012668	WBGene00018182	WBGene00018569	WBGene00017091	WBGene00014082	WBGene00011822	WBGene00018347	WBGene00017762	WBGene00022256	WBGene00007156	WBGene00020373	WBGene00022652	WBGene00020363	WBGene00003237	WBGene00016785	WBGene00012042	WBGene00015376	WBGene00007551	WBGene00010526	WBGene00006288	WBGene00015896	WBGene00021279	WBGene00019565	WBGene00016215	WBGene00018517	WBGene00013120	WBGene00018380	WBGene00010183	WBGene00012965	WBGene00021136	WBGene00008478	WBGene00015421
Engelmann et al 2011 (Table_S9)_harp_down	DOWN 24h on Harposporium	WBGene00012246	WBGene00020532	WBGene00009950	WBGene00013648	WBGene00013954	WBGene00019961	WBGene00019961	WBGene00010775	WBGene00018651	WBGene00007992	WBGene00007181	WBGene00017729	WBGene00009826	WBGene00011669	WBGene00020069	WBGene00008972	WBGene00000185	WBGene00001984	WBGene00011700	WBGene00009039	WBGene00000185	WBGene00001122	WBGene00013152	WBGene00022567	WBGene00015142	WBGene00020069	WBGene00017650	WBGene00018649	WBGene00013754	WBGene00013754	WBGene00013555	WBGene00006526	WBGene00019038	WBGene00003551	WBGene00001147	WBGene00013495	WBGene00020078	WBGene00013479	WBGene00000742	WBGene00000631	WBGene00020141	WBGene00006960	WBGene00010880	WBGene00009022	WBGene00020802	WBGene00019793	WBGene00020045	WBGene00012455
Engelmann et al 2011 (Table_S9)_con_up	UP 12h on D. coniospora	WBGene00000555	WBGene00017695	WBGene00012598	WBGene00005597	WBGene00005735	WBGene00018272	WBGene00018601	WBGene00044900	WBGene00015046	WBGene00015046	WBGene00000558	WBGene00000560	WBGene00002103	WBGene00002094	WBGene00010069	WBGene00007682	WBGene00018727	WBGene00022528	WBGene00020325	WBGene00003879	WBGene00020250	WBGene00014173	WBGene00005082	WBGene00013655	WBGene00018111	WBGene00003770	WBGene00020888	WBGene00044293	WBGene00000556	WBGene00000556	WBGene00009964	WBGene00009969	WBGene00017509	WBGene00018608	WBGene00011549	WBGene00018600	WBGene00007804	WBGene00010005	WBGene00010005	WBGene00044687	WBGene00009963	WBGene00006208	WBGene00016300	WBGene00008243	WBGene00008960	WBGene00010931	WBGene00016527	WBGene00010931
Engelmann et al 2011 (Table_S9)_con_down	DOWN 12h on D. coniospora	WBGene00006224	WBGene00023499	WBGene00009363	WBGene00001765	WBGene00010683	WBGene00020863	WBGene00009467	WBGene00012415	WBGene00022225	WBGene00018028	WBGene00012473	WBGene00012914	WBGene00011874	WBGene00013007	WBGene00013007	WBGene00019908	WBGene00006139	WBGene00021974	WBGene00005999	WBGene00005189	WBGene00012597	WBGene00013054	WBGene00006224	WBGene00006109	WBGene00016855	WBGene00012346	WBGene00009248	WBGene00018810	WBGene00010753	WBGene00008798	WBGene00013929	WBGene00013972	WBGene00013930	WBGene00006080	WBGene00005893	WBGene00005324	WBGene00002096	WBGene00007672	WBGene00013589	WBGene00022747	WBGene00021230	WBGene00008303	WBGene00015387	WBGene00044406	WBGene00009359	WBGene00016517	WBGene00015260	WBGene00015416
Engelmann et al 2011 (Table_S18)_con_up	UP on D. coniospora detected by at least 2 techniques	WBGene00003767	WBGene00005000	WBGene00001990	WBGene00000556	WBGene00000557	WBGene00011831	WBGene00003771	WBGene00012185	WBGene00013691	WBGene00012483	WBGene00013008	WBGene00003080	WBGene00015046	WBGene00003766	WBGene00007499	WBGene00015755	WBGene00007608	WBGene00015907	WBGene00015918	WBGene00007658	WBGene00016299	WBGene00001910	WBGene00008591	WBGene00017305	WBGene00017340	WBGene00017695	WBGene00045392	WBGene00045393	WBGene00017838	WBGene00018724	WBGene00018731	WBGene00010005	WBGene00010135	WBGene00010596	WBGene00010790	WBGene00011134	WBGene00011446	WBGene00020943	WBGene00012831	WBGene00021710	WBGene00014173	WBGene00015150	WBGene00007430	WBGene00007554	WBGene00016250	WBGene00006353	WBGene00008825	WBGene00018013
Murphy et al 2003 (Table_S1)_DAF-16_up	DAF-16 upregulated	WBGene00007072	WBGene00015042	WBGene00015044	WBGene00015052	WBGene00015067	WBGene00002048	WBGene00015116	WBGene00003096	WBGene00007336	WBGene00004927	WBGene00001564	WBGene00007363	WBGene00004932	WBGene00007425	WBGene00015596	WBGene00015598	WBGene00007440	WBGene00007458	WBGene00007452	WBGene00000424	WBGene00003778	WBGene00007651	WBGene00003097	WBGene00015947	WBGene00007677	WBGene00016052	WBGene00016097	WBGene00023417	WBGene00003552	WBGene00016172	WBGene00001852	WBGene00016296	WBGene00007919	WBGene00016407	WBGene00016506	WBGene00008040	WBGene00043187	WBGene00008100	WBGene00000981	WBGene00016670	WBGene00016716	WBGene00016728	WBGene00016848	WBGene00000551	WBGene00016845	WBGene00016875	WBGene00000781	WBGene00016894
Murphy et al 2003 (Table_S1)_DAF-16_down	DAF-16 downregulated	WBGene00001533	WBGene00000099	WBGene00015028	WBGene00015112	WBGene00007153	WBGene00002178	WBGene00015259	WBGene00007215	WBGene00006342	WBGene00015400	WBGene00004795	WBGene00006929	WBGene00007319	WBGene00007320	WBGene00015469	WBGene00007362	WBGene00000479	WBGene00003813	WBGene00007430	WBGene00007455	WBGene00007447	WBGene00000522	WBGene00004103	WBGene00003224	WBGene00007508	WBGene00007509	WBGene00007533	WBGene00015710	WBGene00007602	WBGene00015802	WBGene00015814	WBGene00007626	WBGene00006126	WBGene00007656	WBGene00015933	WBGene00015940	WBGene00016061	WBGene00007717	WBGene00016103	WBGene00016120	WBGene00016118	WBGene00007833	WBGene00016326	WBGene00007864	WBGene00007873	WBGene00007875	WBGene00007876	WBGene00007867
Sarkies et al 2012 (Table_S4)_orsay_up	Orsay UP in N2 and rde-1 but unaltered in JU1580	WBGene00007134	WBGene00007658	WBGene00007659	WBGene00008067	WBGene00008068	WBGene00008069	WBGene00008267	WBGene00008269	WBGene00009166	WBGene00009167	WBGene00009168	WBGene00009169	WBGene00009170	WBGene00012091	WBGene00013634	WBGene00015225	WBGene00016281	WBGene00018345	WBGene00020228	WBGene00021979	WBGene00022375	WBGene00022476	WBGene00044708
Sarkies et al 2013 (Table_S1)_orsay_N2_up	Orsay UP in N2	WBGene00003222	WBGene00004622	WBGene00007097	WBGene00007134	WBGene00007658	WBGene00007659	WBGene00007660	WBGene00008067	WBGene00008068	WBGene00008069	WBGene00008267	WBGene00009166	WBGene00009167	WBGene00009168	WBGene00009169	WBGene00009170	WBGene00011604	WBGene00012591	WBGene00015225	WBGene00015227	WBGene00015602	WBGene00016281	WBGene00017031	WBGene00018345	WBGene00020228	WBGene00021081	WBGene00021979	WBGene00022375	WBGene00022476	WBGene00023483	WBGene00044708	WBGene00045401
Bakowski et al 2014 (Table_S2)_64h_UP	UP on 64h Nematocida Parisii	WBGene00050899	WBGene00045207	WBGene00044237	WBGene00017214	WBGene00007659	WBGene00008519	WBGene00018997	WBGene00010262	WBGene00011954	WBGene00020228	WBGene00009842	WBGene00008758	WBGene00002067	WBGene00000704	WBGene00006628	WBGene00045457	WBGene00017270	WBGene00001890	WBGene00001917	WBGene00001886	WBGene00001477	WBGene00006627	WBGene00008843	WBGene00015598	WBGene00009166	WBGene00021601	WBGene00019644	WBGene00001885	WBGene00001918	WBGene00001889	WBGene00020579	WBGene00007657	WBGene00016281	WBGene00018730	WBGene00012137	WBGene00004231	WBGene00012961	WBGene00010822	WBGene00020700	WBGene00007203	WBGene00022096	WBGene00015476	WBGene00011130	WBGene00004120	WBGene00017667	WBGene00017681	WBGene00007682	WBGene00045401
Bakowski et al 2014 (Table_S2)_64h_DOWN	DOWN on 64h Nematocida Parisii	WBGene00000693	WBGene00000608	WBGene00006928	WBGene00003828	WBGene00017892	WBGene00000609	WBGene00013035	WBGene00004999	WBGene00019958	WBGene00000217	WBGene00000751	WBGene00006927	WBGene00020662	WBGene00016769	WBGene00012176	WBGene00019895	WBGene00000757	WBGene00013986	WBGene00044292	WBGene00006926	WBGene00010793	WBGene00000713	WBGene00019730	WBGene00001240	WBGene00015389	WBGene00010050	WBGene00009192	WBGene00018877	WBGene00001819	WBGene00012664	WBGene00002269	WBGene00000118	WBGene00015514	WBGene00003658	WBGene00011733	WBGene00008194	WBGene00003485	WBGene00003577	WBGene00001633	WBGene00000696	WBGene00017691	WBGene00010070	WBGene00000781	WBGene00000754	WBGene00044696	WBGene00020369	WBGene00019957	WBGene00018984
Bakowski et al 2014 (Table_S2)_40h_UP	UP on 40h Nematocida Parisii	WBGene00009167	WBGene00007659	WBGene00012091	WBGene00007657	WBGene00009169	WBGene00022476	WBGene00018345	WBGene00002094	WBGene00007134	WBGene00044708	WBGene00012400	WBGene00202498	WBGene00018997	WBGene00022550	WBGene00017214	WBGene00044794	WBGene00021601	WBGene00015602	WBGene00014193	WBGene00009166	WBGene00006627	WBGene00045416	WBGene00001884	WBGene00001888	WBGene00001900	WBGene00015598	WBGene00009061	WBGene00008301	WBGene00044237	WBGene00017270	WBGene00015227	WBGene00001885	WBGene00001918	WBGene00001889	WBGene00009168	WBGene00012137	WBGene00015455	WBGene00012757	WBGene00015225	WBGene00017667	WBGene00015605	WBGene00045457	WBGene00022713	WBGene00045401	WBGene00008302	WBGene00021081	WBGene00018646	WBGene00009898
Bakowski et al 2014 (Table_S2)_40h_DOWN	DOWN on 40h Nematocida Parisii	WBGene00019978	WBGene00019730	WBGene00000712	WBGene00003091	WBGene00000118	WBGene00004993	WBGene00016027	WBGene00017964	WBGene00003786	WBGene00003956	WBGene00000989	WBGene00000657	WBGene00014000	WBGene00018138	WBGene00019368	WBGene00000703	WBGene00008390	WBGene00010943	WBGene00018400	WBGene00017881	WBGene00001397	WBGene00018602	WBGene00000212	WBGene00019565	WBGene00011487	WBGene00001156	WBGene00000967	WBGene00015141	WBGene00021160	WBGene00022642	WBGene00008565	WBGene00003778	WBGene00014669	WBGene00000652	WBGene00001761	WBGene00001387	WBGene00007112	WBGene00011222	WBGene00008669	WBGene00007565	WBGene00013947	WBGene00007228	WBGene00015052	WBGene00018146	WBGene00017660	WBGene00014251	WBGene00010659	WBGene00000602
Bakowski et al 2014 (Table_S2)_30h_UP	UP on 30h Nematocida Parisii	WBGene00009168	WBGene00044708	WBGene00007659	WBGene00044237	WBGene00022781	WBGene00009167	WBGene00007657	WBGene00021081	WBGene00012091	WBGene00008267	WBGene00015223	WBGene00009908	WBGene00022476	WBGene00009169	WBGene00007134	WBGene00007656	WBGene00015602	WBGene00008067	WBGene00195165	WBGene00008269	WBGene00018911	WBGene00012400	WBGene00022550	WBGene00012726	WBGene00015455	WBGene00007661	WBGene00023483	WBGene00013294	WBGene00050959	WBGene00015839	WBGene00015600	WBGene00020228	WBGene00021233	WBGene00044709	WBGene00015834	WBGene00017214	WBGene00015224	WBGene00045393	WBGene00044787	WBGene00009170	WBGene00022713	WBGene00021179	WBGene00004811	WBGene00015226	WBGene00077773	WBGene00015225	WBGene00009166	WBGene00007658
Bakowski et al 2014 (Table_S2)_30h_DOWN	DOWN on 30h Nematocida Parisii	WBGene00007422	WBGene00008567	WBGene00007963	WBGene00020182	WBGene00014669	WBGene00000213	WBGene00018885	WBGene00015756	WBGene00015759	WBGene00015623	WBGene00009877	WBGene00017500	WBGene00017490	WBGene00020938	WBGene00007833	WBGene00012404	WBGene00001330	WBGene00008495	WBGene00007875	WBGene00017501	WBGene00021236	WBGene00017499	WBGene00017093	WBGene00007867	WBGene00018708	WBGene00011418
Bakowski et al 2014 (Table_S2)_16h_UP	UP on 16h Nematocida Parisii	WBGene00008267	WBGene00044708	WBGene00007657	WBGene00012726	WBGene00022550	WBGene00007662	WBGene00007134	WBGene00022476	WBGene00007661	WBGene00015834	WBGene00009167	WBGene00044237	WBGene00044709	WBGene00013294	WBGene00008067	WBGene00008269	WBGene00044014	WBGene00008873	WBGene00004149	WBGene00008872	WBGene00015835	WBGene00015224	WBGene00020228	WBGene00009169	WBGene00044013	WBGene00012910	WBGene00015225	WBGene00009168	WBGene00195165	WBGene00015227	WBGene00012091	WBGene00008302	WBGene00009166	WBGene00007659	WBGene00020357	WBGene00045401	WBGene00008301	WBGene00009061	WBGene00021081	WBGene00022547	WBGene00007656	WBGene00018345	WBGene00138721	WBGene00007131	WBGene00007658	WBGene00022375	WBGene00012400	WBGene00007660
Bakowski et al 2014 (Table_S2)_8h_UP	UP on 8h Nematocida Parisii	WBGene00012726	WBGene00007657	WBGene00195165	WBGene00012091	WBGene00007662	WBGene00009167	WBGene00022550	WBGene00007659	WBGene00007134	WBGene00044708	WBGene00044014	WBGene00022476	WBGene00008067	WBGene00009898	WBGene00015834	WBGene00022547	WBGene00044709	WBGene00008068	WBGene00045475	WBGene00023483	WBGene00008873	WBGene00015224	WBGene00008269	WBGene00012400	WBGene00012067	WBGene00015835	WBGene00009169	WBGene00050959	WBGene00008872	WBGene00044427	WBGene00010821	WBGene00045415	WBGene00014189	WBGene00019699	WBGene00010206	WBGene00015114	WBGene00021193	WBGene00018461	WBGene00018460	WBGene00004402	WBGene00015226	WBGene00021964	WBGene00020637	WBGene00012822	WBGene00020228	WBGene00011168	WBGene00194902	WBGene00018102
Engelmann et al 2011 (Table_S9)_E. faecalis_up	UP E. faecalis 24h	WBGene00018004	WBGene00015562	WBGene00018001	WBGene00009386	WBGene00009384	WBGene00009383	WBGene00015568	WBGene00011515	WBGene00007733	WBGene00008490	WBGene00008912	WBGene00008497	WBGene00018002	WBGene00003620	WBGene00010864	WBGene00003625	WBGene00015963	WBGene00003629	WBGene00008162	WBGene00015964	WBGene00017225	WBGene00005481	WBGene00005482	WBGene00011192	WBGene00009708	WBGene00018310	WBGene00018641	WBGene00018640	WBGene00013911	WBGene00013913	WBGene00012421	WBGene00016491	WBGene00012425	WBGene00004285	WBGene00009948	WBGene00007735	WBGene00015364	WBGene00015367	WBGene00005937	WBGene00005932	WBGene00011422	WBGene00019866	WBGene00022180	WBGene00008383	WBGene00011425	WBGene00010917	WBGene00003714	WBGene00008015
Engelmann et al 2011 (Table_S9)_E. faecalis_down	Down E. faecalis 24h	WBGene00021308	WBGene00019194	WBGene00043996	WBGene00021301	WBGene00016308	WBGene00009382	WBGene00021731	WBGene00006189	WBGene00006025	WBGene00003765	WBGene00009069	WBGene00009514	WBGene00017718	WBGene00009652	WBGene00009067	WBGene00017360	WBGene00044352	WBGene00020738	WBGene00010538	WBGene00018095	WBGene00005324	WBGene00018644	WBGene00011190	WBGene00044359	WBGene00020736	WBGene00009662	WBGene00012852	WBGene00012853	WBGene00020397	WBGene00003018	WBGene00019804	WBGene00013527	WBGene00017148	WBGene00016082	WBGene00012038	WBGene00021548	WBGene00015046	WBGene00017093	WBGene00022261	WBGene00001878	WBGene00001879	WBGene00002013	WBGene00001876	WBGene00001877	WBGene00015913	WBGene00050885	WBGene00016464	WBGene00016721
Engelmann et al 2011 (Table_S9)_P.luminescens_up	UP P.luminescens 24h	WBGene00018004	WBGene00015562	WBGene00012648	WBGene00009384	WBGene00004123	WBGene00015568	WBGene00008490	WBGene00008493	WBGene00008492	WBGene00008495	WBGene00008494	WBGene00008497	WBGene00008496	WBGene00003622	WBGene00003627	WBGene00003625	WBGene00015963	WBGene00008162	WBGene00008167	WBGene00015964	WBGene00017225	WBGene00018648	WBGene00003091	WBGene00008215	WBGene00009708	WBGene00018310	WBGene00018641	WBGene00018640	WBGene00018643	WBGene00019769	WBGene00012429	WBGene00004944	WBGene00012425	WBGene00015361	WBGene00015364	WBGene00015367	WBGene00017335	WBGene00005932	WBGene00011422	WBGene00014023	WBGene00022180	WBGene00011426	WBGene00008383	WBGene00011425	WBGene00010917	WBGene00003714	WBGene00003713	WBGene00008547
Engelmann et al 2011 (Table_S9)_P.luminescens_down	Down P.luminescens 24h	WBGene00021308	WBGene00012724	WBGene00015854	WBGene00019194	WBGene00021301	WBGene00019804	WBGene00019805	WBGene00018360	WBGene00013728	WBGene00010982	WBGene00002012	WBGene00009069	WBGene00009514	WBGene00011296	WBGene00008163	WBGene00007611	WBGene00009067	WBGene00017360	WBGene00009849	WBGene00018091	WBGene00008242	WBGene00044356	WBGene00018095	WBGene00018096	WBGene00018644	WBGene00020638	WBGene00044451	WBGene00018315	WBGene00009662	WBGene00012852	WBGene00012853	WBGene00020393	WBGene00020397	WBGene00012589	WBGene00005408	WBGene00020016	WBGene00012424	WBGene00009005	WBGene00003750	WBGene00012036	WBGene00015366	WBGene00012039	WBGene00015044	WBGene00015045	WBGene00017099	WBGene00010603	WBGene00022261	WBGene00022266
Yang et al 2016, WormExp_12h_1:2_BT247_UP	UP by B. thuringiensis at 12h (BT247, 1:2) (Yang)	WBGene00001059	WBGene00015560	WBGene00016265	WBGene00009383	WBGene00018360	WBGene00016262	WBGene00002016	WBGene00002013	WBGene00007633	WBGene00010980	WBGene00007511	WBGene00007512	WBGene00008020	WBGene00200802	WBGene00013031	WBGene00009061	WBGene00189951	WBGene00017361	WBGene00189953	WBGene00009702	WBGene00019525	WBGene00004236	WBGene00008797	WBGene00016762	WBGene00009705	WBGene00014116	WBGene00012923	WBGene00018311	WBGene00009842	WBGene00012926	WBGene00019931	WBGene00017146	WBGene00012583	WBGene00000370	WBGene00007159	WBGene00000372	WBGene00012587	WBGene00012589	WBGene00016946	WBGene00009486	WBGene00004052	WBGene00016866	WBGene00016865	WBGene00011748	WBGene00001577	WBGene00015878	WBGene00016785	WBGene00016783
Yang et al 2016, WormExp_6h_1:10_BT247_UP	UP by B. thuringiensis at 6h (BT247, 1:10) (Yang)	WBGene00000503	WBGene00004123	WBGene00016265	WBGene00011517	WBGene00008497	WBGene00000969	WBGene00195179	WBGene00003625	WBGene00009061	WBGene00017361	WBGene00004236	WBGene00020637	WBGene00044458	WBGene00018096	WBGene00018097	WBGene00012923	WBGene00018311	WBGene00012921	WBGene00019931	WBGene00017146	WBGene00012583	WBGene00000370	WBGene00004758	WBGene00020546	WBGene00004052	WBGene00015048	WBGene00015362	WBGene00016862	WBGene00001577	WBGene00015040	WBGene00045515	WBGene00016785	WBGene00016783	WBGene00001477	WBGene00045457	WBGene00022181	WBGene00194713	WBGene00014173	WBGene00022189	WBGene00008389	WBGene00020945	WBGene00003653	WBGene00000977	WBGene00003574	WBGene00003573	WBGene00000562	WBGene00003473	WBGene00008944
Yang et al 2016, WormExp_6h_1:2_BT247_UP	UP by B. thuringiensis at 6h (BT247, 1:2) (Yang)	WBGene00000503	WBGene00015560	WBGene00016265	WBGene00011517	WBGene00000969	WBGene00011174	WBGene00009061	WBGene00017361	WBGene00004236	WBGene00044458	WBGene00016763	WBGene00012923	WBGene00044457	WBGene00009842	WBGene00019931	WBGene00003640	WBGene00017146	WBGene00012583	WBGene00000370	WBGene00004758	WBGene00020546	WBGene00004052	WBGene00015048	WBGene00015362	WBGene00016862	WBGene00001577	WBGene00045515	WBGene00016785	WBGene00016783	WBGene00045511	WBGene00001477	WBGene00045457	WBGene00022181	WBGene00194713	WBGene00006533	WBGene00022189	WBGene00008389	WBGene00003653	WBGene00000977	WBGene00022843	WBGene00009805	WBGene00003574	WBGene00004400	WBGene00000562	WBGene00003473	WBGene00008944	WBGene00008969	WBGene00009403
Yang et al 2016, WormExp_12h_1:10_BT247_UP	UP by B. thuringiensis at 12h (BT247, 1:10) (Yang)	WBGene00018004	WBGene00009383	WBGene00011517	WBGene00008168	WBGene00010869	WBGene00189951	WBGene00189952	WBGene00009702	WBGene00009705	WBGene00011190	WBGene00012374	WBGene00018315	WBGene00004758	WBGene00012425	WBGene00009948	WBGene00194658	WBGene00015362	WBGene00009941	WBGene00194654	WBGene00045456	WBGene00045457	WBGene00010919	WBGene00008383	WBGene00011428	WBGene00008389	WBGene00008541	WBGene00007633	WBGene00003573	WBGene00018841	WBGene00022162	WBGene00015215	WBGene00015216	WBGene00044674	WBGene00007977	WBGene00011737	WBGene00007125	WBGene00007659	WBGene00194788	WBGene00006650	WBGene00021081	WBGene00003884	WBGene00013771	WBGene00019660	WBGene00019662	WBGene00044078	WBGene00019461	WBGene00019468	WBGene00006470
Engelmann et al 2011 (Table_S2)_S. marcescens_up	UP S. marcescens 24h	WBGene00012648	WBGene00008493	WBGene00008492	WBGene00008495	WBGene00008494	WBGene00008496	WBGene00010864	WBGene00003625	WBGene00015963	WBGene00015965	WBGene00015148	WBGene00017225	WBGene00015141	WBGene00018647	WBGene00018646	WBGene00018316	WBGene00018643	WBGene00012429	WBGene00012422	WBGene00015362	WBGene00005931	WBGene00016026	WBGene00011422	WBGene00011425	WBGene00010917	WBGene00003714	WBGene00003713	WBGene00003711	WBGene00022612	WBGene00008545	WBGene00022346	WBGene00008541	WBGene00008019	WBGene00008548	WBGene00007632	WBGene00003572	WBGene00003571	WBGene00003570	WBGene00013356	WBGene00022160	WBGene00008944	WBGene00044679	WBGene00021886	WBGene00013594	WBGene00044672	WBGene00012518	WBGene00003402	WBGene00022504
Engelmann et al 2011 (Table_S2)_S. marcescens_down	Down S. marcescens 24h	WBGene00000503	WBGene00018005	WBGene00012720	WBGene00012721	WBGene00016305	WBGene00016016	WBGene00019804	WBGene00018363	WBGene00021307	WBGene00015769	WBGene00011103	WBGene00016488	WBGene00002013	WBGene00002012	WBGene00002011	WBGene00007517	WBGene00007511	WBGene00018476	WBGene00009069	WBGene00015968	WBGene00008287	WBGene00021259	WBGene00009067	WBGene00017249	WBGene00011199	WBGene00018766	WBGene00018767	WBGene00008794	WBGene00009705	WBGene00008248	WBGene00018768	WBGene00018310	WBGene00020736	WBGene00009844	WBGene00017146	WBGene00012428	WBGene00016948	WBGene00020548	WBGene00000478	WBGene00017802	WBGene00012589	WBGene00020469	WBGene00020017	WBGene00020016	WBGene00004052	WBGene00009948	WBGene00001828	WBGene00020986
Osman et al 2018 (Data_S2)_N2 12h	N2 12h	WBGene00000740	WBGene00000699	WBGene00001067	WBGene00000649	WBGene00000691	WBGene00001074	WBGene00015227	WBGene00000665	WBGene00000741	WBGene00000594	WBGene00015225	WBGene00021625	WBGene00000717	WBGene00000606	WBGene00000599	WBGene00000031	WBGene00022679	WBGene00000681	WBGene00000742	WBGene00009983	WBGene00004174	WBGene00000743	WBGene00000672	WBGene00004300	WBGene00001066	WBGene00000704	WBGene00022189	WBGene00018297	WBGene00000738	WBGene00000618	WBGene00000678	WBGene00000616	WBGene00000641	WBGene00000603	WBGene00000650	WBGene00000739	WBGene00001725	WBGene00000625	WBGene00009724	WBGene00017484	WBGene00001716	WBGene00016659	WBGene00020242	WBGene00000653	WBGene00015339	WBGene00015660	WBGene00016274	WBGene00044901
Osman et al 2018 (Data_S2)_N2 24h	N2 24h	WBGene00019314	WBGene00014173	WBGene00020613	WBGene00015227	WBGene00000928	WBGene00007131	WBGene00022550	WBGene00000720	WBGene00003879	WBGene00015046	WBGene00008301	WBGene00016422	WBGene00044901	WBGene00016281	WBGene00022816	WBGene00003934	WBGene00015223	WBGene00008842	WBGene00009926	WBGene00012256	WBGene00000558	WBGene00012255	WBGene00011848	WBGene00044379	WBGene00007142	WBGene00001068	WBGene00020546	WBGene00018418	WBGene00013263	WBGene00009621	WBGene00018345	WBGene00016534	WBGene00011860	WBGene00006366	WBGene00003769	WBGene00001387	WBGene00021979	WBGene00012257	WBGene00010492	WBGene00007196	WBGene00044427	WBGene00021197	WBGene00007134	WBGene00004423	WBGene00017506	WBGene00000675	WBGene00000882	WBGene00007132
Osman et al 2018 (Data_S2)_JU2519 12h	JU2519 12h	WBGene00015227	WBGene00015225	WBGene00000606	WBGene00019314	WBGene00008842	WBGene00005016	WBGene00021197	WBGene00018345	WBGene00022550	WBGene00005017	WBGene00019540	WBGene00007131	WBGene00007297	WBGene00000373	WBGene00020546	WBGene00004397	WBGene00044427	WBGene00012268	WBGene00000672	WBGene00015223	WBGene00011848	WBGene00003863	WBGene00008301	WBGene00000625	WBGene00000678	WBGene00008858	WBGene00012399	WBGene00009628	WBGene00000752	WBGene00006894	WBGene00000603	WBGene00008671	WBGene00013754	WBGene00000683	WBGene00022548	WBGene00007055	WBGene00021977	WBGene00012381	WBGene00004398	WBGene00001725	WBGene00002077	WBGene00006986	WBGene00010686	WBGene00021978	WBGene00000754	WBGene00012185	WBGene00000755
Osman et al 2018 (Data_S2)_JU2519 24h	JU2519 24h	WBGene00015225	WBGene00015227	WBGene00019314	WBGene00010314	WBGene00022550	WBGene00008842	WBGene00011848	WBGene00044427	WBGene00020546	WBGene00013076	WBGene00010885	WBGene00006894	WBGene00007131	WBGene00015223	WBGene00013754	WBGene00044203	WBGene00018345	WBGene00003863	WBGene00003470	WBGene00008030	WBGene00012399	WBGene00008175	WBGene00003457	WBGene00008231	WBGene00011929	WBGene00022007	WBGene00013473	WBGene00045242	WBGene00009959	WBGene00010254	WBGene00011961	WBGene00001603	WBGene00008541	WBGene00008301	WBGene00011168	WBGene00021743	WBGene00012965	WBGene00012268	WBGene00010377	WBGene00044901	WBGene00021969	WBGene00011795	WBGene00021742	WBGene00007467	WBGene00021118	WBGene00007134	WBGene00012381	WBGene00009344
Reddy et al 2019 IPR	IPR	WBGene00001885	WBGene00001889	WBGene00001918	WBGene00002021	WBGene00004002	WBGene00004810	WBGene00004811	WBGene00007131	WBGene00007132	WBGene00007134	WBGene00007656	WBGene00007657	WBGene00007658	WBGene00007659	WBGene00007660	WBGene00007661	WBGene00007662	WBGene00008067	WBGene00008267	WBGene00008269	WBGene00008301	WBGene00008302	WBGene00008850	WBGene00009061	WBGene00009166	WBGene00009169	WBGene00009898	WBGene00009908	WBGene00010822	WBGene00012091	WBGene00012399	WBGene00012400	WBGene00012726	WBGene00012757	WBGene00012910	WBGene00012961	WBGene00013294	WBGene00014046	WBGene00015223	WBGene00015224	WBGene00015225	WBGene00015226	WBGene00015227	WBGene00015600	WBGene00015602	WBGene00015605	WBGene00015828	WBGene00015834
Reddy et al 2019 (Table_S4)_BTZ UP	BTZ UP	WBGene00007656	WBGene00015225	WBGene00008301	WBGene00009168	WBGene00045401	WBGene00002018	WBGene00018345	WBGene00009166	WBGene00012091	WBGene00007657	WBGene00007134	WBGene00002026	WBGene00044237	WBGene00022550	WBGene00194645	WBGene00015227	WBGene00022476	WBGene00002016	WBGene00002020	WBGene00002019	WBGene00012910	WBGene00007660	WBGene00009061	WBGene00008302	WBGene00008269	WBGene00138721	WBGene00017214	WBGene00008069	WBGene00020357	WBGene00007659	WBGene00020080	WBGene00008067	WBGene00002017	WBGene00002015	WBGene00004149	WBGene00015834	WBGene00044709	WBGene00008068	WBGene00045457	WBGene00007661	WBGene00045393	WBGene00008267	WBGene00044708	WBGene00007131	WBGene00009169	WBGene00044787	WBGene00009691	WBGene00009692
Reddy et al 2019 (Table_S4)_pals-22 UP	pals-22 UP	WBGene00000006	WBGene00000013	WBGene00000019	WBGene00000068	WBGene00000088	WBGene00000133	WBGene00000170	WBGene00000190	WBGene00000252	WBGene00000285	WBGene00000367	WBGene00000397	WBGene00000402	WBGene00000458	WBGene00000476	WBGene00000510	WBGene00000512	WBGene00000541	WBGene00000546	WBGene00000562	WBGene00000594	WBGene00000596	WBGene00000599	WBGene00000601	WBGene00000602	WBGene00000603	WBGene00000606	WBGene00000615	WBGene00000616	WBGene00000625	WBGene00000626	WBGene00000638	WBGene00000639	WBGene00000641	WBGene00000645	WBGene00000647	WBGene00000649	WBGene00000653	WBGene00000663	WBGene00000665	WBGene00000666	WBGene00000667	WBGene00000671	WBGene00000672	WBGene00000678	WBGene00000681	WBGene00000683	WBGene00000687
Reddy et al 2019 (Table_S4)_pals-22;pals-25 UP	pals-22;pals-25 UP	WBGene00000003	WBGene00000006	WBGene00000036	WBGene00000066	WBGene00000068	WBGene00000081	WBGene00000138	WBGene00000169	WBGene00000170	WBGene00000175	WBGene00000176	WBGene00000212	WBGene00000225	WBGene00000228	WBGene00000256	WBGene00000266	WBGene00000273	WBGene00000281	WBGene00000286	WBGene00000298	WBGene00000370	WBGene00000516	WBGene00000594	WBGene00000596	WBGene00000599	WBGene00000601	WBGene00000602	WBGene00000603	WBGene00000606	WBGene00000608	WBGene00000609	WBGene00000616	WBGene00000626	WBGene00000636	WBGene00000638	WBGene00000639	WBGene00000641	WBGene00000649	WBGene00000653	WBGene00000655	WBGene00000656	WBGene00000657	WBGene00000663	WBGene00000665	WBGene00000666	WBGene00000667	WBGene00000668	WBGene00000669
Oliveira et al 2009, skn-1_up(oliveira)	skn-1_up(oliveira)	WBGene00018465	WBGene00000040	WBGene00000067	WBGene00000116	WBGene00000133	WBGene00000172	WBGene00000179	WBGene00000212	WBGene00000239	WBGene00000240	WBGene00000298	WBGene00000302	WBGene00000412	WBGene00000972	WBGene00000986	WBGene00001331	WBGene00001399	WBGene00001465	WBGene00001468	WBGene00001520	WBGene00001674	WBGene00001749	WBGene00001752	WBGene00001754	WBGene00001755	WBGene00001756	WBGene00001758	WBGene00001760	WBGene00001761	WBGene00001762	WBGene00001783	WBGene00001784	WBGene00001786	WBGene00001790	WBGene00001882	WBGene00001940	WBGene00001993	WBGene00002021	WBGene00002058	WBGene00002067	WBGene00002137	WBGene00002234	WBGene00002272	WBGene00002273	WBGene00003235	WBGene00003957	WBGene00003958	WBGene00003959
Steinbaugh et al 2015, skn-1_up(steinbaugh)	skn-1_up(steinbaugh)	WBGene00010148	WBGene00001764	WBGene00001752	WBGene00014206	WBGene00021796	WBGene00001761	WBGene00010705	WBGene00010759	WBGene00007533	WBGene00015479	WBGene00001786	WBGene00007254	WBGene00018146	WBGene00017154	WBGene00017937	WBGene00020016	WBGene00013101	WBGene00002260	WBGene00008334	WBGene00001841	WBGene00008779	WBGene00011725	WBGene00011321	WBGene00012324	WBGene00019232	WBGene00019233	WBGene00019580	WBGene00018984	WBGene00006416	WBGene00007691	WBGene00004092	WBGene00001099	WBGene00015965	WBGene00008205	WBGene00007833	WBGene00015141	WBGene00019477	WBGene00013904	WBGene00008485	WBGene00008451	WBGene00017515	WBGene00001244	WBGene00022683	WBGene00004235	WBGene00003561	WBGene00003922	WBGene00004506	WBGene00004501
Steinbaugh et al 2015, skn-1_up (germline free)	skn-1_up (germline free)	WBGene00001764	WBGene00014206	WBGene00001752	WBGene00001761	WBGene00009554	WBGene00010759	WBGene00001786	WBGene00001755	WBGene00001749	WBGene00001768	WBGene00021200	WBGene00020016	WBGene00007833	WBGene00008602	WBGene00008583	WBGene00011517	WBGene00008485	WBGene00016844	WBGene00009186	WBGene00015965	WBGene00004468	WBGene00003925	WBGene00003952	WBGene00003950	WBGene00004460	WBGene00003926	WBGene00004504	WBGene00004463	WBGene00003953	WBGene00003928	WBGene00004502	WBGene00003923	WBGene00003948	WBGene00004465	WBGene00004503	WBGene00004466	WBGene00004505	WBGene00004458	WBGene00003949	WBGene00004467	WBGene00004506	WBGene00003947	WBGene00019619	WBGene00000753	WBGene00007488	WBGene00007352	WBGene00004737	WBGene00010093
Pukkila-Worley et al 2011 (Table_S1)_UP by C. albicans	UP by C. albicans	WBGene00000503	WBGene00017644	WBGene00008964	WBGene00018803	WBGene00022597	WBGene00011596	WBGene00019435	WBGene00017361	WBGene00004236	WBGene00044356	WBGene00010290	WBGene00044280	WBGene00006616	WBGene00019547	WBGene00016866	WBGene00001366	WBGene00013996	WBGene00019404	WBGene00008425	WBGene00008389	WBGene00007287	WBGene00014000	WBGene00015449	WBGene00016670	WBGene00020722	WBGene00011839	WBGene00016677	WBGene00011894	WBGene00010222	WBGene00011330	WBGene00021369	WBGene00000712	WBGene00015197	WBGene00019060	WBGene00009895	WBGene00000013	WBGene00009724	WBGene00011801	WBGene00009008	WBGene00017659	WBGene00019717	WBGene00009805	WBGene00022013	WBGene00012190	WBGene00009803	WBGene00012198	WBGene00011522	WBGene00022872
Pukkila-Worley et al 2011 (Table_S1)_Down by C. albicans	Down by C. albicans	WBGene00006438	WBGene00007455	WBGene00019803	WBGene00014562	WBGene00016786	WBGene00017975	WBGene00002011	WBGene00001752	WBGene00022593	WBGene00009971	WBGene00009787	WBGene00013037	WBGene00017247	WBGene00003625	WBGene00015085	WBGene00002259	WBGene00010904	WBGene00012323	WBGene00010595	WBGene00008167	WBGene00021503	WBGene00018760	WBGene00020954	WBGene00019249	WBGene00018645	WBGene00018647	WBGene00010062	WBGene00021128	WBGene00010064	WBGene00007848	WBGene00004058	WBGene00000646	WBGene00000641	WBGene00016943	WBGene00015949	WBGene00018971	WBGene00018905	WBGene00019017	WBGene00016027	WBGene00007685	WBGene00016782	WBGene00003095	WBGene00003096	WBGene00016781	WBGene00006915	WBGene00008621	WBGene00021814	WBGene00004989
Pukkila-Worley et al 2011 (Table_S1)_UP by heat-killed C. albicans	UP by heat-killed C. albicans	WBGene00000503	WBGene00017151	WBGene00012531	WBGene00022597	WBGene00022196	WBGene00020801	WBGene00011596	WBGene00019435	WBGene00017361	WBGene00044280	WBGene00016769	WBGene00009215	WBGene00019547	WBGene00005228	WBGene00019717	WBGene00010125	WBGene00001366	WBGene00013996	WBGene00001477	WBGene00019404	WBGene00017312	WBGene00001162	WBGene00014000	WBGene00013763	WBGene00016670	WBGene00020722	WBGene00021491	WBGene00011894	WBGene00010222	WBGene00011330	WBGene00018343	WBGene00003473	WBGene00018101	WBGene00009956	WBGene00015197	WBGene00019060	WBGene00015216	WBGene00019411	WBGene00019146	WBGene00011733	WBGene00011801	WBGene00009008	WBGene00017659	WBGene00019546	WBGene00003402	WBGene00022013	WBGene00012190	WBGene00017947
Head et al 2017 (Table_S5)_UP by PA14	UP by PA14(Head)	WBGene00016577	WBGene00007599	WBGene00001754	WBGene00001753	WBGene00008493	WBGene00009971	WBGene00020760	WBGene00010750	WBGene00001786	WBGene00010998	WBGene00018760	WBGene00005657	WBGene00018647	WBGene00018646	WBGene00019738	WBGene00017764	WBGene00010123	WBGene00010125	WBGene00010126	WBGene00010128	WBGene00009397	WBGene00021253	WBGene00001761	WBGene00018971	WBGene00015362	WBGene00014771	WBGene00016783	WBGene00019404	WBGene00007811	WBGene00019644	WBGene00006627	WBGene00002094	WBGene00006628	WBGene00020578	WBGene00021491	WBGene00014063	WBGene00001817	WBGene00015198	WBGene00012518	WBGene00008229	WBGene00015859	WBGene00017226	WBGene00019547	WBGene00003402	WBGene00015455	WBGene00002274	WBGene00012961	WBGene00000412
Head et al 2017 (Table_S5)_Down by PA14	Down by PA14(Head)	WBGene00004062	WBGene00017962	WBGene00016957	WBGene00017567	WBGene00016595	WBGene00011694	WBGene00008905	WBGene00077701	WBGene00011753	WBGene00017485	WBGene00016875	WBGene00007422	WBGene00014761	WBGene00008205	WBGene00021743	WBGene00000169	WBGene00016013	WBGene00008068	WBGene00008436	WBGene00003704	WBGene00016644	WBGene00007947	WBGene00020182	WBGene00016664	WBGene00019495	WBGene00018174	WBGene00019978	WBGene00011487	WBGene00005444	WBGene00001156	WBGene00021335	WBGene00012633	WBGene00021337	WBGene00009626	WBGene00006404	WBGene00016942	WBGene00018138	WBGene00011112	WBGene00016943	WBGene00017881	WBGene00002055	WBGene00010189	WBGene00001243	WBGene00021742	WBGene00011407	WBGene00020315	WBGene00013073	WBGene00001244
Tjahjono et al 2017 (Table_S1)_UP slow killing by PA14	PA14 slow killing	WBGene00008886	WBGene00016577	WBGene00007599	WBGene00009978	WBGene00008495	WBGene00020760	WBGene00008392	WBGene00020801	WBGene00013236	WBGene00013090	WBGene00019435	WBGene00003702	WBGene00005657	WBGene00014194	WBGene00012923	WBGene00018311	WBGene00018646	WBGene00012583	WBGene00010125	WBGene00010126	WBGene00017806	WBGene00021253	WBGene00015362	WBGene00001764	WBGene00001577	WBGene00003092	WBGene00014771	WBGene00018874	WBGene00008389	WBGene00019644	WBGene00007833	WBGene00006627	WBGene00003653	WBGene00001391	WBGene00006628	WBGene00020578	WBGene00020579	WBGene00011330	WBGene00015350	WBGene00006649	WBGene00009957	WBGene00015216	WBGene00012101	WBGene00012451	WBGene00017308	WBGene00000480	WBGene00019146	WBGene00015859
Tjahjono et al 2017 (Table_S1)_UP liquid killing by PA14	PA14 liquid killing	WBGene00015776	WBGene00004258	WBGene00003388	WBGene00002016	WBGene00002015	WBGene00002020	WBGene00001564	WBGene00002010	WBGene00012531	WBGene00002019	WBGene00002018	WBGene00008476	WBGene00010759	WBGene00012323	WBGene00012324	WBGene00012923	WBGene00009706	WBGene00003705	WBGene00014013	WBGene00022115	WBGene00009666	WBGene00012988	WBGene00021709	WBGene00016250	WBGene00005228	WBGene00022326	WBGene00018370	WBGene00001479	WBGene00000762	WBGene00015369	WBGene00016785	WBGene00016783	WBGene00001477	WBGene00019404	WBGene00194713	WBGene00017093	WBGene00018966	WBGene00007833	WBGene00009142	WBGene00003655	WBGene00020947	WBGene00023503	WBGene00018164	WBGene00017565	WBGene00015295	WBGene00011231	WBGene00011230	WBGene00004744
Nakad et al 2016 (File S15)_UP by PA14 12hours	UP PA14 12h	WBGene00009778	WBGene00010790	WBGene00007228	WBGene00001591	WBGene00016319	WBGene00017060	WBGene00017199	WBGene00004196	WBGene00007957	WBGene00012961	WBGene00010125	WBGene00007833	WBGene00022142	WBGene00006628	WBGene00014063	WBGene00008944	WBGene00019215	WBGene00008988	WBGene00022644	WBGene00019564	WBGene00077593	WBGene00016788	WBGene00017660	WBGene00011799	WBGene00011800	WBGene00008167	WBGene00003957	WBGene00005657	WBGene00021518	WBGene00044468	WBGene00016004	WBGene00044492	WBGene00017041	WBGene00019273	WBGene00044206	WBGene00009488	WBGene00021322	WBGene00021895	WBGene00010998	WBGene00007506	WBGene00018760	WBGene00009432	WBGene00013838	WBGene00010357	WBGene00017764	WBGene00007807	WBGene00002274	WBGene00010475
Nakad et al 2016 (File S15)_Down by PA14 12hours	Down PA14 12h	WBGene00008027	WBGene00045095	WBGene00009590	WBGene00016013	WBGene00004567	WBGene00011046	WBGene00009982	WBGene00000753	WBGene00000699	WBGene00003844	WBGene00012812	WBGene00007344	WBGene00000221	WBGene00012633	WBGene00014057	WBGene00008436	WBGene00008205	WBGene00045316	WBGene00000133	WBGene00015043	WBGene00013073	WBGene00007422	WBGene00015141	WBGene00017082	WBGene00044922	WBGene00016943	WBGene00005444	WBGene00016875	WBGene00009215	WBGene00007565	WBGene00017874	WBGene00016797	WBGene00011128	WBGene00007330	WBGene00020182	WBGene00000785	WBGene00021070	WBGene00013083	WBGene00010274	WBGene00015623	WBGene00008560	WBGene00012130	WBGene00000988	WBGene00020962	WBGene00018138	WBGene00000657	WBGene00008341	WBGene00006588
Nakad et al 2016 (File S15)_UP by PA14 24hours	UP PA14 24h	WBGene00020325	WBGene00019436	WBGene00012449	WBGene00009466	WBGene00001852	WBGene00016598	WBGene00043053	WBGene00021339	WBGene00194815	WBGene00012712	WBGene00012573	WBGene00010453	WBGene00013009	WBGene00010150	WBGene00009778	WBGene00011213	WBGene00005833	WBGene00016180	WBGene00016719	WBGene00009433	WBGene00017785	WBGene00007694	WBGene00044403	WBGene00014836	WBGene00018346	WBGene00017340	WBGene00019840	WBGene00008490	WBGene00001577	WBGene00016111	WBGene00077594	WBGene00012819	WBGene00003652	WBGene00011727	WBGene00010935	WBGene00022083	WBGene00021579	WBGene00044661	WBGene00012081	WBGene00015259	WBGene00010072	WBGene00007807	WBGene00010752	WBGene00020774	WBGene00020449	WBGene00020448	WBGene00045412	WBGene00044654
Nakad et al 2016 (File S15)_Down by PA14 24hours	Down PA14 24h	WBGene00013424	WBGene00001390	WBGene00000670	WBGene00017736	WBGene00008007	WBGene00020992	WBGene00004960	WBGene00014103	WBGene00010473	WBGene00021581	WBGene00014158	WBGene00003431	WBGene00003452	WBGene00019021	WBGene00012786	WBGene00022849	WBGene00011376	WBGene00020516	WBGene00219849	WBGene00008157	WBGene00010960	WBGene00017446	WBGene00005040	WBGene00000639	WBGene00000626	WBGene00011554	WBGene00006670	WBGene00021791	WBGene00003375	WBGene00003664	WBGene00000711	WBGene00012900	WBGene00016523	WBGene00004394	WBGene00000723	WBGene00206386	WBGene00000602	WBGene00022776	WBGene00014057	WBGene00017933	WBGene00008436	WBGene00008205	WBGene00010467	WBGene00008537	WBGene00002183	WBGene00022854	WBGene00001694	WBGene00006528
Visvikis et al 2014 (Table_S2)_UP by S. aureus	UP S. aureus	WBGene00015776	WBGene00004825	WBGene00014164	WBGene00007055	WBGene00010440	WBGene00019801	WBGene00006431	WBGene00006789	WBGene00007992	WBGene00002016	WBGene00002015	WBGene00003691	WBGene00002013	WBGene00002012	WBGene00001752	WBGene00003388	WBGene00020326	WBGene00018803	WBGene00003092	WBGene00002019	WBGene00014165	WBGene00016669	WBGene00003620	WBGene00010115	WBGene00019636	WBGene00017364	WBGene00006825	WBGene00012928	WBGene00005657	WBGene00008415	WBGene00015046	WBGene00007007	WBGene00017054	WBGene00006611	WBGene00003528	WBGene00020886	WBGene00001918	WBGene00004037	WBGene00001591	WBGene00001602	WBGene00015767	WBGene00000370	WBGene00003755	WBGene00001604	WBGene00004933	WBGene00004758	WBGene00016500	WBGene00005833
Bond et al 2014 (Dataset_S1)_UP by S. aureus	UP S. aureus(Bond)	WBGene00000503	WBGene00018005	WBGene00012727	WBGene00017396	WBGene00009387	WBGene00006431	WBGene00009383	WBGene00007992	WBGene00002013	WBGene00002012	WBGene00008490	WBGene00003620	WBGene00003837	WBGene00017364	WBGene00189950	WBGene00017361	WBGene00009700	WBGene00004236	WBGene00008247	WBGene00008248	WBGene00018311	WBGene00018643	WBGene00200244	WBGene00016417	WBGene00020546	WBGene00017806	WBGene00017804	WBGene00016866	WBGene00001577	WBGene00015042	WBGene00015044	WBGene00008538	WBGene00001476	WBGene00001477	WBGene00011420	WBGene00017654	WBGene00011424	WBGene00008388	WBGene00001878	WBGene00001879	WBGene00001875	WBGene00001876	WBGene00015912	WBGene00020121	WBGene00010788	WBGene00010789	WBGene00009804	WBGene00007638
Bond et al 2014 (Dataset_S1)_Down by S. aureus	Down S. aureus(Bond)	WBGene00004120	WBGene00010034	WBGene00017719	WBGene00017716	WBGene00007455	WBGene00015270	WBGene00008091	WBGene00019654	WBGene00020243	WBGene00001757	WBGene00010983	WBGene00008560	WBGene00008809	WBGene00012273	WBGene00000067	WBGene00001758	WBGene00010988	WBGene00018393	WBGene00001240	WBGene00000930	WBGene00011450	WBGene00017594	WBGene00022517	WBGene00015965	WBGene00020315	WBGene00019089	WBGene00018885	WBGene00020528	WBGene00009706	WBGene00021236	WBGene00017577	WBGene00010123	WBGene00020394	WBGene00016502	WBGene00015281	WBGene00019756	WBGene00007331	WBGene00017703	WBGene00020484	WBGene00012032	WBGene00017499	WBGene00017498	WBGene00017962	WBGene00016786	WBGene00020311	WBGene00010850	WBGene00008810	WBGene00019154
[truncated: 3,074 more columns]
